# Supplementary material
Source: PubMed Central journal article supplement (PMC4524223)
Supplement: JVI.00628-15_zjv999090648so1.pdf [file JVI.00628-15_zjv999090648so1.pdf]

**Table S1A. N- and O-linked glycopeptide compositions of membrane-anchored Env(-) $\Delta$ 712 obtained from preparation 1**

| CS | Experimental <i>m/z</i> | Theoretical <i>m/z</i> | Mass Error (ppm) | Peptide Sequence                       | Glycan                        |
|----|-------------------------|------------------------|------------------|----------------------------------------|-------------------------------|
| 3+ | 1218.1958               | 1218.1958              | 0                | ACVPTDPNPQEVVLENVTEHF                  | [Hex]4[HexNAc]3               |
| 3+ | 1266.8880               | 1266.8817              | 5                | ACVPTDPNPQEVVLENVTEHF                  | [Hex]4[HexNAc]3[Fuc]1         |
| 3+ | 1363.9077               | 1363.9135              | 4                | ACVPTDPNPQEVVLENVTEHF                  | [Hex]4[HexNAc]3[Fuc]1[NeuAc]1 |
| 3+ | 1320.9020               | 1320.8993              | 2                | ACVPTDPNPQEVVLENVTEHF                  | [Hex]5[HexNAc]3[Fuc]1         |
| 3+ | 1456.2904               | 1456.2856              | 3                | ACVPTDPNPQEVVLENVTEHF                  | [Hex]5[HexNAc]5[Fuc]1         |
| 3+ | 1528.6179               | 1528.6259              | 5                | ACVPTDPNPQEVVLENVTEHF                  | [Hex]11[HexNAc]2              |
|    |                         |                        |                  |                                        |                               |
| 4+ | 924.1640                | 924.1553               | 9                | ACVPTDPNPQEVVLENVTEHF                  | [Hex]3[HexNAc]4               |
| 4+ | 964.6755                | 964.6685               | 7                | ACVPTDPNPQEVVLENVTEHF                  | [Hex]4[HexNAc]4               |
| 4+ | 1183.7579               | 1183.7491              | 7                | ACVPTDPNPQEVVLENVTEHF                  | [Hex]6[HexNAc]6[Fuc]1         |
| 4+ | 1297.0415               | 1297.0361              | 4                | ACVPTDPNPQEVVLENVTEHF                  | [Hex]7[HexNAc]6[Fuc]1[NeuAc]1 |
|    |                         |                        |                  |                                        |                               |
| 4+ | 1139.5008               | 1139.4954              | 5                | ATHACVPTDPNPQEVVLENVTEHF               | [Hex]3[HexNAc]6[Fuc]1         |
| 4+ | 1078.4762               | 1078.4689              | 7                | ATHACVPTDPNPQEVVLENVTEHF               | [Hex]4[HexNAc]4[Fuc]1         |
| 4+ | 1151.2442               | 1151.2428              | 1                | ATHACVPTDPNPQEVVLENVTEHF               | [Hex]4[HexNAc]4[Fuc]1[NeuAc]1 |
| 4+ | 1242.5140               | 1242.5258              | 9                | ATHACVPTDPNPQEVVLENVTEHF               | [Hex]5[HexNAc]5[Fuc]1[NeuAc]1 |
| 4+ | 1210.2646               | 1210.2652              | 0.5              | ATHACVPTDPNPQEVVLENVTEHF               | [Hex]6[HexNAc]5[Fuc]1         |
| 4+ | 1183.4964               | 1183.4940              | 2                | ATHACVPTDPNPQEVVLENVTEHF               | [Hex]10[HexNAc]2              |
|    |                         |                        |                  |                                        |                               |
| 4+ | 1171.0432               | 1171.0390              | 4                | AYDTEVHNVWATHACVPTDPNPQEVVLENVTEHFNMWK | [HexNAc]                      |
| 4+ | 1221.8007               | 1221.8103              | 8                | AYDTEVHNVWATHACVPTDPNPQEVVLENVTEHFNMWK | [HexNAc]2                     |
| 4+ | 1262.3183               | 1262.3234              | 4                | AYDTEVHNVWATHACVPTDPNPQEVVLENVTEHFNMWK | [Hex]1[HexNAc]2               |
| 4+ | 1302.8295               | 1302.8367              | 6                | AYDTEVHNVWATHACVPTDPNPQEVVLENVTEHFNMWK | [Hex]2[HexNAc]2               |
| 4+ | 1394.1139               | 1394.1197              | 4                | AYDTEVHNVWATHACVPTDPNPQEVVLENVTEHFNMWK | [Hex]3[HexNAc]3               |
| 4+ | 1430.6406               | 1430.6342              | 4                | AYDTEVHNVWATHACVPTDPNPQEVVLENVTEHFNMWK | [Hex]3[HexNAc]3[Fuc]1         |
| 4+ | 1383.8683               | 1383.8631              | 4                | AYDTEVHNVWATHACVPTDPNPQEVVLENVTEHFNMWK | [Hex]4[HexNAc]2               |
| 4+ | 1464.8940               | 1464.8895              | 3                | AYDTEVHNVWATHACVPTDPNPQEVVLENVTEHFNMWK | [Hex]6[HexNAc]2               |
| 4+ | 1505.4130               | 1505.4027              | 7                | AYDTEVHNVWATHACVPTDPNPQEVVLENVTEHFNMWK | [Hex]7[HexNAc]2               |
| 4+ | 1545.9117               | 1545.9159              | 3                | AYDTEVHNVWATHACVPTDPNPQEVVLENVTEHFNMWK | [Hex]8[HexNAc]2               |
| 4+ | 1586.4367               | 1586.4291              | 5                | AYDTEVHNVWATHACVPTDPNPQEVVLENVTEHFNMWK | [Hex]9[HexNAc]2               |
|    |                         |                        |                  |                                        |                               |
| 5+ | 1074.8855               | 1074.8813              | 4                | AYDTEVHNVWATHACVPTDPNPQEVVLENVTEHFNMWK | [Hex]3[HexNAc]2               |
| 5+ | 1185.3304               | 1185.3247              | 5                | AYDTEVHNVWATHACVPTDPNPQEVVLENVTEHFNMWK | [Hex]3[HexNAc]4[Fuc]1         |
| 5+ | 1225.9348               | 1225.9406              | 5                | AYDTEVHNVWATHACVPTDPNPQEVVLENVTEHFNMWK | [Hex]3[HexNAc]5[Fuc]1         |
| 5+ | 1139.7091               | 1139.7025              | 6                | AYDTEVHNVWATHACVPTDPNPQEVVLENVTEHFNMWK | [Hex]5[HexNAc]2               |
| 5+ | 1220.9332               | 1220.9342              | 1                | AYDTEVHNVWATHACVPTDPNPQEVVLENVTEHFNMWK | [Hex]5[HexNAc]4               |
| 5+ | 1250.1411               | 1250.1458              | 4                | AYDTEVHNVWATHACVPTDPNPQEVVLENVTEHFNMWK | [Hex]5[HexNAc]4[Fuc]1         |
| 5+ | 1308.3713               | 1308.3649              | 5                | AYDTEVHNVWATHACVPTDPNPQEVVLENVTEHFNMWK | [Hex]5[HexNAc]4[Fuc]1[NeuAc]1 |
| 5+ | 1279.1549               | 1279.1533              | 1                | AYDTEVHNVWATHACVPTDPNPQEVVLENVTEHFNMWK | [Hex]5[HexNAc]4[NeuAc]1       |
| 5+ | 1311.5583               | 1311.5639              | 4                | AYDTEVHNVWATHACVPTDPNPQEVVLENVTEHFNMWK | [Hex]6[HexNAc]4[NeuAc]1       |
| 5+ | 1381.3930               | 1381.3913              | 1                | AYDTEVHNVWATHACVPTDPNPQEVVLENVTEHFNMWK | [Hex]6[HexNAc]5[Fuc]1[NeuAc]1 |
| 5+ | 1497.8365               | 1497.8295              | 5                | AYDTEVHNVWATHACVPTDPNPQEVVLENVTEHFNMWK | [Hex]6[HexNAc]5[Fuc]1[NeuAc]3 |
| 5+ | 1570.8641               | 1570.8559              | 5                | AYDTEVHNVWATHACVPTDPNPQEVVLENVTEHFNMWK | [Hex]7[HexNAc]6[Fuc]1[NeuAc]3 |
| 5+ | 1629.0784               | 1629.0750              | 2                | AYDTEVHNVWATHACVPTDPNPQEVVLENVTEHFNMWK | [Hex]7[HexNAc]6[Fuc]1[NeuAc]4 |
|    |                         |                        |                  |                                        |                               |
| 4+ | 1120.2757               | 1120.2706              | 5                | AYDTEVHNVWATHACVPTDPNPQEVVLENVTEHFNMWK | non-glycosylated              |
|    |                         |                        |                  |                                        |                               |
| 3+ | 1321.8367               | 1321.8439              | 5                | DVNATNTTNDSEGTMER                      | [Hex]8[HexNAc]4               |
| 3+ | 1375.8591               | 1375.8615              | 2                | DVNATNTTNDSEGTMER                      | [Hex]9[HexNAc]4               |
| 3+ | 1429.8766               | 1429.8791              | 2                | DVNATNTTNDSEGTMER                      | [Hex]10[HexNAc]4              |
| 3+ | 1483.8897               | 1483.8967              | 5                | DVNATNTTNDSEGTMER                      | [Hex]11[HexNAc]4              |
| 3+ | 1537.9281               | 1537.9143              | 9                | DVNATNTTNDSEGTMER                      | [Hex]12[HexNAc]4              |
| 3+ | 1591.9308               | 1591.9319              | 1                | DVNATNTTNDSEGTMER                      | [Hex]13[HexNAc]4              |

| CS | Experimental m/z | Theoretical m/z | Mass Error (ppm) | Peptide Sequence  | Glycan                         |
|----|------------------|-----------------|------------------|-------------------|--------------------------------|
| 3+ | 1645.9437        | 1645.9495       | 4                | DVNATNTTNDSEGTMER | [Hex]14[HexNAc]4               |
| 3+ | 1699.9697        | 1699.9671       | 2                | DVNATNTTNDSEGTMER | [Hex]15[HexNAc]4               |
| 3+ | 1753.9903        | 1753.9847       | 3                | DVNATNTTNDSEGTMER | [Hex]16[HexNAc]4               |
| 3+ | 1808.0186        | 1808.0023       | 9                | DVNATNTTNDSEGTMER | [Hex]17[HexNAc]4               |
| 3+ | 1862.0086        | 1862.0199       | 6                | DVNATNTTNDSEGTMER | [Hex]18[HexNAc]4               |
| 3+ | 1916.0539        | 1916.0501       | 2                | DVNATNTTNDSEGTMER | [Hex]19[HexNAc]4               |
|    |                  |                 |                  |                   |                                |
| 2+ | 1029.4314        | 1029.4291       | 2                | DVNATNTTNDSEGTMER | [HexNAc]                       |
| 2+ | 1130.9698        | 1130.9716       | 2                | DVNATNTTNDSEGTMER | [HexNAc]2                      |
| 3+ | 862.3536         | 862.3520        | 2                | DVNATNTTNDSEGTMER | [Hex]2[HexNAc]2                |
| 3+ | 916.3705         | 916.3696        | 1                | DVNATNTTNDSEGTMER | [Hex]3[HexNAc]2                |
| 2+ | 1475.6009        | 1475.5905       | 7                | DVNATNTTNDSEGTMER | [Hex]3[HexNAc]3                |
| 3+ | 1100.4502        | 1100.4418       | 8                | DVNATNTTNDSEGTMER | [Hex]3[HexNAc]4[Fuc]1          |
| 3+ | 1168.1387        | 1168.1350       | 3                | DVNATNTTNDSEGTMER | [Hex]3[HexNAc]5[Fuc]1          |
| 2+ | 1455.0785        | 1455.0772       | 1                | DVNATNTTNDSEGTMER | [Hex]4[HexNAc]2                |
| 2+ | 1556.6168        | 1556.6169       | 0.1              | DVNATNTTNDSEGTMER | [Hex]4[HexNAc]3                |
| 3+ | 1086.7683        | 1086.7663       | 2                | DVNATNTTNDSEGTMER | [Hex]4[HexNAc]3[Fuc]1          |
| 3+ | 1024.4042        | 1024.4048       | 1                | DVNATNTTNDSEGTMER | [Hex]5[HexNAc]2                |
| 3+ | 1092.0950        | 1092.0979       | 3                | DVNATNTTNDSEGTMER | [Hex]5[HexNAc]3                |
| 3+ | 1078.4232        | 1078.4224       | 1                | DVNATNTTNDSEGTMER | [Hex]6[HexNAc]2                |
| 2+ | 1718.6659        | 1718.6697       | 2                | DVNATNTTNDSEGTMER | [Hex]6[HexNAc]3                |
| 2+ | 1698.1510        | 1698.1564       | 3                | DVNATNTTNDSEGTMER | [Hex]7[HexNAc]2                |
| 3+ | 1200.1336        | 1200.1331       | 0.4              | DVNATNTTNDSEGTMER | [Hex]7[HexNAc]3                |
| 2+ | 1779.1798        | 1779.1828       | 2                | DVNATNTTNDSEGTMER | [Hex]8[HexNAc]2                |
| 2+ | 1860.2111        | 1860.2092       | 1                | DVNATNTTNDSEGTMER | [Hex]9[HexNAc]2                |
|    |                  |                 |                  |                   |                                |
| 2+ | 928.3893         | 928.3842        | 5                | DVNATNTTNDSEGTMER | non-glycosylated               |
|    |                  |                 |                  |                   |                                |
| 3+ | 1033.0933        | 1033.0934       | 0.1              | NCSFNITTSIR       | [Hex]6[HexNAc]4                |
| 3+ | 1087.1145        | 1087.1110       | 3                | NCSFNITTSIR       | [Hex]7[HexNAc]4                |
| 3+ | 1141.1318        | 1141.1286       | 3                | NCSFNITTSIR       | [Hex]8[HexNAc]4                |
| 3+ | 1698.6675        | 1698.6769       | 6                | NCSFNITTSIR       | [Hex]9[HexNAc]10[Fuc]2         |
| 3+ | 1195.1445        | 1195.1463       | 2                | NCSFNITTSIR       | [Hex]9[HexNAc]4                |
| 3+ | 1249.1684        | 1249.1639       | 4                | NCSFNITTSIR       | [Hex]10[HexNAc]4               |
| 3+ | 1500.9266        | 1500.9292       | 2                | NCSFNITTSIR       | [Hex]10[HexNAc]7[Fuc]1         |
| 3+ | 1303.1820        | 1303.1815       | 0.4              | NCSFNITTSIR       | [Hex]11[HexNAc]4               |
| 3+ | 1613.6316        | 1613.6242       | 5                | NCSFNITTSIR       | [Hex]11[HexNAc]5[Fuc]1[NeuAc]2 |
| 3+ | 1487.2573        | 1487.2537       | 2                | NCSFNITTSIR       | [Hex]11[HexNAc]6[Fuc]1         |
| 3+ | 1632.6259        | 1632.6313       | 3                | NCSFNITTSIR       | [Hex]11[HexNAc]6[NeuAc]2       |
| 3+ | 1554.9466        | 1554.9468       | 0.1              | NCSFNITTSIR       | [Hex]11[HexNAc]7[Fuc]1         |
| 3+ | 1749.0076        | 1749.0104       | 2                | NCSFNITTSIR       | [Hex]11[HexNAc]7[Fuc]1[NeuAc]2 |
| 3+ | 1357.2008        | 1357.1991       | 1                | NCSFNITTSIR       | [Hex]12[HexNAc]4               |
| 3+ | 1667.6487        | 1667.6418       | 4                | NCSFNITTSIR       | [Hex]12[HexNAc]5[Fuc]1[NeuAc]2 |
| 3+ | 1541.2748        | 1541.2713       | 2                | NCSFNITTSIR       | [Hex]12[HexNAc]6[Fuc]1         |
| 3+ | 1411.2146        | 1411.2167       | 1                | NCSFNITTSIR       | [Hex]13[HexNAc]4               |
| 3+ | 1721.6649        | 1721.6594       | 3                | NCSFNITTSIR       | [Hex]13[HexNAc]5[Fuc]1[NeuAc]2 |
| 3+ | 1730.6728        | 1730.6751       | 1                | NCSFNITTSIR       | [Hex]13[HexNAc]8[Fuc]1         |
| 3+ | 1465.2334        | 1465.2343       | 1                | NCSFNITTSIR       | [Hex]14[HexNAc]4               |
| 3+ | 1519.2493        | 1519.2519       | 2                | NCSFNITTSIR       | [Hex]15[HexNAc]4               |
| 3+ | 1573.2673        | 1573.2695       | 1                | NCSFNITTSIR       | [Hex]16[HexNAc]4               |
| 3+ | 1627.2903        | 1627.2871       | 2                | NCSFNITTSIR       | [Hex]17[HexNAc]4               |
| 3+ | 1681.3093        | 1681.3047       | 3                | NCSFNITTSIR       | [Hex]18[HexNAc]4               |
| 3+ | 1735.3241        | 1735.3223       | 1                | NCSFNITTSIR       | [Hex]19[HexNAc]4               |
| 3+ | 1789.3431        | 1789.3399       | 2                | NCSFNITTSIR       | [Hex]20[HexNAc]4               |
|    |                  |                 |                  |                   |                                |
| 4+ | 1075.1803        | 1075.1789       | 1                | NCSFNITTSIR       | [Hex]10[HexNAc]6[Fuc]1         |

| CS | Experimental m/z | Theoretical m/z | Mass Error (ppm) | Peptide Sequence | Glycan                         |
|----|------------------|-----------------|------------------|------------------|--------------------------------|
| 4+ | 1228.9814        | 1228.9791       | 2                | NCSFNITTSIR      | [Hex]12[HexNAc]6[Fuc]1[NeuAc]1 |
| 2+ | 758.3615         | 758.3563        | 7                | NCSFNITTSIR      | [HexNAc]                       |
| 2+ | 940.9258         | 940.9251        | 1                | NCSFNITTSIR      | [Hex]1[HexNAc]2                |
| 2+ | 1102.9785        | 1102.9779       | 1                | NCSFNITTSIR      | [Hex]3[HexNAc]2                |
| 2+ | 1306.0652        | 1306.0573       | 6                | NCSFNITTSIR      | [Hex]3[HexNAc]4                |
| 2+ | 1379.0852        | 1379.0862       | 1                | NCSFNITTSIR      | [Hex]3[HexNAc]4[Fuc]1          |
| 2+ | 1480.6290        | 1480.6260       | 2                | NCSFNITTSIR      | [Hex]3[HexNAc]5[Fuc]1          |
| 3+ | 1055.1169        | 1055.1129       | 4                | NCSFNITTSIR      | [Hex]3[HexNAc]6[Fuc]1          |
| 2+ | 1184.0084        | 1184.0044       | 3                | NCSFNITTSIR      | [Hex]4[HexNAc]2                |
| 2+ | 1460.1070        | 1460.1127       | 4                | NCSFNITTSIR      | [Hex]4[HexNAc]4 [Fuc]1         |
| 2+ | 1605.6487        | 1605.6604       | 7                | NCSFNITTSIR      | [Hex]4[HexNAc]4[Fuc]1[NeuAc]1  |
| 2+ | 1561.6498        | 1561.6523       | 2                | NCSFNITTSIR      | [Hex]4[HexNAc]5[Fuc]1          |
| 2+ | 1707.2036        | 1707.2001       | 2                | NCSFNITTSIR      | [Hex]4[HexNAc]5[Fuc]1[NeuAc]1  |
| 3+ | 1235.5073        | 1235.5009       | 5                | NCSFNITTSIR      | [Hex]4[HexNAc]5[Fuc]1[NeuAc]2  |
| 2+ | 1265.0347        | 1265.0307       | 3                | NCSFNITTSIR      | [Hex]5[HexNAc]2                |
| 2+ | 1569.6475        | 1569.6498       | 1                | NCSFNITTSIR      | [Hex]5[HexNAc]5                |
| 2+ | 1642.6829        | 1642.6788       | 2                | NCSFNITTSIR      | [Hex]5[HexNAc]5[Fuc]1          |
| 3+ | 1192.4826        | 1192.4867       | 3                | NCSFNITTSIR      | [Hex]5[HexNAc]5[Fuc]1[NeuAc]1  |
| 3+ | 1289.5173        | 1289.5185       | 1                | NCSFNITTSIR      | [Hex]5[HexNAc]5[Fuc]1[NeuAc]2  |
| 3+ | 1163.1555        | 1163.1480       | 6                | NCSFNITTSIR      | [Hex]5[HexNAc]6[Fuc]1          |
| 3+ | 1260.1875        | 1260.1798       | 6                | NCSFNITTSIR      | [Hex]5[HexNAc]6[Fuc]1[NeuAc]1  |
| 2+ | 1346.0628        | 1346.0572       | 4                | NCSFNITTSIR      | [Hex]6[HexNAc]2                |
| 3+ | 1246.5087        | 1246.5043       | 4                | NCSFNITTSIR      | [Hex]6[HexNAc]5[Fuc]1[NeuAc]1  |
| 3+ | 1343.5382        | 1343.5361       | 2                | NCSFNITTSIR      | [Hex]6[HexNAc]5[Fuc]1[NeuAc]2  |
| 3+ | 1314.2022        | 1314.1975       | 4                | NCSFNITTSIR      | [Hex]6[HexNAc]6[Fuc]1[NeuAc]1  |
| 3+ | 1411.2267        | 1411.2293       | 2                | NCSFNITTSIR      | [Hex]6[HexNAc]6[Fuc]1[NeuAc]2  |
| 2+ | 1427.0894        | 1427.0836       | 4                | NCSFNITTSIR      | [Hex]7[HexNAc]2                |
| 3+ | 1465.2465        | 1465.2469       | 0.3              | NCSFNITTSIR      | [Hex]7[HexNAc]6[Fuc]1[NeuAc]2  |
| 3+ | 1532.9405        | 1532.9400       | 0.3              | NCSFNITTSIR      | [Hex]7[HexNAc]7[Fuc]1[NeuAc]2  |
| 2+ | 1508.1190        | 1508.1100       | 6                | NCSFNITTSIR      | [Hex]8[HexNAc]2                |
| 2+ | 1589.1449        | 1589.1364       | 5                | NCSFNITTSIR      | [Hex]9[HexNAc]2                |
| 3+ | 1113.7786        | 1113.7776       | 1                | NCSFNITTSIR      | [Hex]10[HexNAc]2               |
| 2+ | 758.3615         | 758.3563        | 7                | NCSFNITTSIR      | [HexNAc]                       |
| 2+ | 940.9258         | 940.9251        | 1                | NCSFNITTSIR      | [Hex]1[HexNAc]2                |
| 2+ | 1102.9785        | 1102.9779       | 1                | NCSFNITTSIR      | [Hex]3[HexNAc]2                |
| 2+ | 1184.0084        | 1184.0044       | 3                | NCSFNITTSIR      | [Hex]4[HexNAc]2                |
| 2+ | 1265.0347        | 1265.0307       | 3                | NCSFNITTSIR      | [Hex]5[HexNAc]2                |
| 2+ | 1346.0628        | 1346.0572       | 4                | NCSFNITTSIR      | [Hex]6[HexNAc]2                |
| 2+ | 1427.0894        | 1427.0836       | 4                | NCSFNITTSIR      | [Hex]7[HexNAc]2                |
| 2+ | 1508.1190        | 1508.1100       | 6                | NCSFNITTSIR      | [Hex]8[HexNAc]2                |
| 2+ | 1589.1449        | 1589.1364       | 5                | NCSFNITTSIR      | [Hex]9[HexNAc]2                |
| 3+ | 1235.5073        | 1235.5009       | 5                | NCSFNITTSIR      | [Hex]4[HexNAc]5[Fuc]1[NeuAc]2  |
| 3+ | 1289.5255        | 1289.5185       | 5                | NCSFNITTSIR      | [Hex]5[HexNAc]5[Fuc]1[NeuAc]2  |
| 3+ | 1465.2465        | 1465.2469       | 0.3              | NCSFNITTSIR      | [Hex]7[HexNAc]6[Fuc]1[NeuAc]2  |
| 3+ | 1113.7786        | 1113.7776       | 1                | NCSFNITTSIR      | [Hex]10[HexNAc]2               |
| 2+ | 656.8192         | 656.8193        | 0.2              | NCSFNITTSIR      | non-glycosylated               |
| 2+ | 791.2907         | 791.2846        | 8                | NCSF             | [Hex]4[HexNAc]2                |
| 2+ | 872.3170         | 872.3110        | 7                | NCSF             | [Hex]5[HexNAc]2                |
| 2+ | 953.3429         | 953.3374        | 6                | NCSF             | [Hex]6[HexNAc]2                |
| 2+ | 1034.3678        | 1034.3638       | 4                | NCSF             | [Hex]7[HexNAc]2                |
| 2+ | 1115.3963        | 1115.3902       | 5                | NCSF             | [Hex]8[HexNAc]2                |

| CS | Experimental m/z | Theoretical m/z | Mass Error (ppm) | Peptide Sequence | Glycan                        |
|----|------------------|-----------------|------------------|------------------|-------------------------------|
| 2+ | 1196.4178        | 1196.4166       | 1                | NCSF             | [Hex]9[HexNAc]2               |
| 2+ | 1277.4476        | 1277.4430       | 4                | NCSF             | [Hex]10[HexNAc]2              |
| 1+ | 527.1960         | 527.1919        | 8                | NCSF             | non-glycosylated              |
| 2+ | 1051.9783        | 1051.9703       | 8                | NITTSIR          | [Hex]3[HexNAc]4               |
| 2+ | 1125.0069        | 1124.9993       | 7                | NITTSIR          | [Hex]3[HexNAc]4[Fuc]1         |
| 2+ | 1226.5451        | 1226.5390       | 5                | NITTSIR          | [Hex]3[HexNAc]5[Fuc]1         |
| 2+ | 1328.0870        | 1328.0787       | 6                | NITTSIR          | [Hex]3[HexNAc]6[Fuc]1         |
| 3+ | 674.3023         | 674.2983        | 6                | NITTSIR          | [Hex]5[HexNAc]2               |
| 2+ | 1287.0627        | 1287.0521       | 8                | NITTSIR          | [Hex]5[HexNAc]4[Fuc]1         |
| 2+ | 1091.9772        | 1091.9702       | 6                | NITTSIR          | [Hex]6[HexNAc]2               |
| 2+ | 1173.0033        | 1172.9966       | 6                | NITTSIR          | [Hex]7[HexNAc]2               |
| 2+ | 1254.0305        | 1254.0230       | 6                | NITTSIR          | [Hex]8[HexNAc]2               |
| 2+ | 1335.0572        | 1335.0494       | 6                | NITTSIR          | [Hex]9[HexNAc]2               |
| 2+ | 1416.0683        | 1416.0758       | 5                | NITTSIR          | [Hex]10[HexNAc]2              |
| 2+ | 702.3825         | 702.3781        | 6                | NITTSIRDEVQK     | non-glycosylated              |
| 2+ | 911.9465         | 911.9418        | 5                | LDVVPIDNNNTSYR   | [HexNAc]                      |
| 2+ | 1013.4835        | 1013.4842       | 1                | LDVVPIDNNNTSYR   | [HexNAc]2                     |
| 2+ | 1094.5100        | 1094.5106       | 1                | LDVVPIDNNNTSYR   | [Hex]1[HexNAc]2               |
| 2+ | 1175.5360        | 1175.5370       | 1                | LDVVPIDNNNTSYR   | [Hex]2[HexNAc]2               |
| 2+ | 1256.5624        | 1256.5634       | 1                | LDVVPIDNNNTSYR   | [Hex]3[HexNAc]2               |
| 2+ | 1431.1334        | 1431.1321       | 1                | LDVVPIDNNNTSYR   | [Hex]3[HexNAc]3[Fuc]1         |
| 2+ | 1532.6757        | 1532.6717       | 3                | LDVVPIDNNNTSYR   | [Hex]3[HexNAc]4[Fuc]1         |
| 2+ | 1634.2160        | 1634.2115       | 3                | LDVVPIDNNNTSYR   | [Hex]3[HexNAc]5[Fuc]1         |
| 2+ | 1613.7015        | 1613.6982       | 2                | LDVVPIDNNNTSYR   | [Hex]4[HexNAc]4 [Fuc]1        |
| 2+ | 1759.2485        | 1759.2459       | 1                | LDVVPIDNNNTSYR   | [Hex]4[HexNAc]4[Fuc]1[NeuAc]1 |
| 2+ | 1877.2899        | 1877.2907       | 0.4              | LDVVPIDNNNTSYR   | [Hex]6[HexNAc]5[Fuc]1         |
| 2+ | 1823.7480        | 1823.7483       | 0.2              | LDVVPIDNNNTSYR   | [Hex]10[HexNAc]2              |
| 3+ | 1157.5072        | 1157.5032       | 3                | LDVVPIDNNNTSYR   | [Hex]3[HexNAc]6[Fuc]1         |
| 3+ | 892.0626         | 892.0623        | 0.3              | LDVVPIDNNNTSYR   | [Hex]4[HexNAc]2               |
| 3+ | 1143.8367        | 1143.8276       | 8                | LDVVPIDNNNTSYR   | [Hex]4[HexNAc]5[Fuc]1         |
| 3+ | 1240.8681        | 1240.8595       | 7                | LDVVPIDNNNTSYR   | [Hex]4[HexNAc]5[Fuc]1[NeuAc]1 |
| 3+ | 1211.5252        | 1211.5208       | 4                | LDVVPIDNNNTSYR   | [Hex]4[HexNAc]6[Fuc]1         |
| 3+ | 1308.5599        | 1308.5526       | 6                | LDVVPIDNNNTSYR   | [Hex]4[HexNAc]6[Fuc]1[NeuAc]1 |
| 3+ | 946.0805         | 946.0799        | 1                | LDVVPIDNNNTSYR   | [Hex]5[HexNAc]2               |
| 3+ | 1130.1493        | 1130.1521       | 2                | LDVVPIDNNNTSYR   | [Hex]5[HexNAc]4[Fuc]1         |
| 3+ | 1227.1890        | 1227.1839       | 4                | LDVVPIDNNNTSYR   | [Hex]5[HexNAc]4[Fuc]1[NeuAc]1 |
| 3+ | 1324.2160        | 1324.2157       | 0.2              | LDVVPIDNNNTSYR   | [Hex]5[HexNAc]4[Fuc]1[NeuAc]2 |
| 3+ | 1294.8812        | 1294.8771       | 3                | LDVVPIDNNNTSYR   | [Hex]5[HexNAc]5[Fuc]1[NeuAc]1 |
| 3+ | 1391.9140        | 1391.9089       | 4                | LDVVPIDNNNTSYR   | [Hex]5[HexNAc]5[Fuc]1[NeuAc]2 |
| 3+ | 1265.5484        | 1265.5384       | 8                | LDVVPIDNNNTSYR   | [Hex]5[HexNAc]6[Fuc]1         |
| 3+ | 1362.5726        | 1362.5702       | 2                | LDVVPIDNNNTSYR   | [Hex]5[HexNAc]6[Fuc]1[NeuAc]1 |
| 3+ | 1459.5962        | 1459.6020       | 4                | LDVVPIDNNNTSYR   | [Hex]5[HexNAc]6[Fuc]1[NeuAc]2 |
| 3+ | 1000.0972        | 1000.0975       | 0.3              | LDVVPIDNNNTSYR   | [Hex]6[HexNAc]2               |
| 3+ | 1348.8992        | 1348.8947       | 3                | LDVVPIDNNNTSYR   | [Hex]6[HexNAc]5[Fuc]1[NeuAc]1 |
| 3+ | 1445.9361        | 1445.9265       | 7                | LDVVPIDNNNTSYR   | [Hex]6[HexNAc]5[Fuc]1[NeuAc]2 |
| 3+ | 1542.9567        | 1542.9583       | 1                | LDVVPIDNNNTSYR   | [Hex]6[HexNAc]5[Fuc]1[NeuAc]3 |
| 3+ | 1513.6183        | 1513.6196       | 1                | LDVVPIDNNNTSYR   | [Hex]6[HexNAc]6[Fuc]1[NeuAc]2 |
| 3+ | 1610.6531        | 1610.6514       | 1                | LDVVPIDNNNTSYR   | [Hex]6[HexNAc]6[Fuc]1[NeuAc]3 |
| 3+ | 1054.1142        | 1054.1151       | 1                | LDVVPIDNNNTSYR   | [Hex]7[HexNAc]2               |
| 3+ | 1373.5759        | 1373.5736       | 2                | LDVVPIDNNNTSYR   | [Hex]7[HexNAc]6[Fuc]1         |

| CS | Experimental <i>m/z</i> | Theoretical <i>m/z</i> | Mass Error (ppm) | Peptide Sequence | Glycan                           |
|----|-------------------------|------------------------|------------------|------------------|----------------------------------|
| 3+ | 1470.6108               | 1470.6054              | 4                | LDVVPIDNNNTSYR   | [Hex]7[HexNAc]6[Fuc]1[NeuAc]1    |
| 3+ | 1567.6227               | 1567.6372              | 9                | LDVVPIDNNNTSYR   | [Hex]7[HexNAc]6[Fuc]1[NeuAc]2    |
| 3+ | 1664.6800               | 1664.6690              | 7                | LDVVPIDNNNTSYR   | [Hex]7[HexNAc]6[Fuc]1[NeuAc]3    |
| 3+ | 1689.3513               | 1689.3479              | 2                | LDVVPIDNNNTSYR   | [Hex]8 [HexNAc]7 [Fuc]1 [NeuAc]2 |
| 3+ | 1108.1326               | 1108.1327              | 0.1              | LDVVPIDNNNTSYR   | [Hex]8[HexNAc]2                  |
| 3+ | 1592.3217               | 1592.3161              | 4                | LDVVPIDNNNTSYR   | [Hex]8[HexNAc]7[Fuc]1[NeuAc]1    |
| 3+ | 1786.3764               | 1786.3797              | 2                | LDVVPIDNNNTSYR   | [Hex]8[HexNAc]7[Fuc]1[NeuAc]3    |
| 3+ | 1162.1499               | 1162.1503              | 0.3              | LDVVPIDNNNTSYR   | [Hex]9[HexNAc]2                  |
| 3+ | 1908.0919               | 1908.0905              | 1                | LDVVPIDNNNTSYR   | [Hex]9[HexNAc]8[Fuc]1[NeuAc]3    |
|    |                         |                        |                  |                  |                                  |
| 2+ | 1458.5940               | 1458.5994              | 4                | LDVVPIDNNNTSYR   | [Hex]5[HexNAc]2[PO3]1            |
|    |                         |                        |                  |                  |                                  |
| 2+ | 810.8993                | 810.8968               | 3                | LDVVPIDNNNTSYR   | non-glycosylated                 |
|    |                         |                        |                  |                  |                                  |
| 1+ | 1213.5349               | 1213.5331              | 1                | SDNFTNNAK        | [HexNAc]1                        |
|    |                         |                        |                  |                  |                                  |
| 2+ | 870.8643                | 870.8627               | 2                | SDNFTNNAK        | [Hex]2[HexNAc]2                  |
| 2+ | 951.8919                | 951.8891               | 3                | SDNFTNNAK        | [Hex]3[HexNAc]2                  |
| 2+ | 1053.4351               | 1053.4288              | 6                | SDNFTNNAK        | [Hex]3[HexNAc]3                  |
| 2+ | 1126.4588               | 1126.4578              | 1                | SDNFTNNAK        | [Hex]3[HexNAc]3[Fuc]1            |
| 2+ | 1154.9763               | 1154.9685              | 7                | SDNFTNNAK        | [Hex]3[HexNAc]4                  |
| 2+ | 1228.0008               | 1227.9974              | 3                | SDNFTNNAK        | [Hex]3[HexNAc]4[Fuc]1            |
| 2+ | 1329.5347               | 1329.5372              | 2                | SDNFTNNAK        | [Hex]3[HexNAc]5[Fuc]1            |
| 2+ | 1431.1002               | 1431.0769              | 16               | SDNFTNNAK        | [Hex]3[HexNAc]6[Fuc]1            |
| 2+ | 1280.0069               | 1280.0029              | 3                | SDNFTNNAK        | [Hex]4 [HexNAc]3 [NeuAc]1        |
| 2+ | 1032.9179               | 1032.9156              | 2                | SDNFTNNAK        | [Hex]4[HexNAc]2                  |
| 2+ | 1134.4586               | 1134.4552              | 3                | SDNFTNNAK        | [Hex]4[HexNAc]3                  |
| 2+ | 1235.9945               | 1235.9949              | 0.3              | SDNFTNNAK        | [Hex]4[HexNAc]4                  |
| 2+ | 1309.0287               | 1309.0239              | 4                | SDNFTNNAK        | [Hex]4[HexNAc]4 [Fuc]1           |
| 2+ | 1454.5605               | 1454.5716              | 8                | SDNFTNNAK        | [Hex]4[HexNAc]4[Fuc]1[NeuAc]1    |
| 2+ | 1381.5391               | 1381.5426              | 3                | SDNFTNNAK        | [Hex]4[HexNAc]4[NeuAc]1          |
| 2+ | 1337.5350               | 1337.5346              | 0.3              | SDNFTNNAK        | [Hex]4[HexNAc]5                  |
| 2+ | 1410.5808               | 1410.5635              | 12               | SDNFTNNAK        | [Hex]4[HexNAc]5[Fuc]1            |
| 2+ | 1512.1082               | 1512.1032              | 3                | SDNFTNNAK        | [Hex]4[HexNAc]6[Fuc]1            |
| 2+ | 1113.9462               | 1113.9419              | 4                | SDNFTNNAK        | [Hex]5[HexNAc]2                  |
| 2+ | 1361.0313               | 1361.0293              | 1                | SDNFTNNAK        | [Hex]5[HexNAc]3 [NeuAc]1         |
| 2+ | 1317.0257               | 1317.0213              | 3                | SDNFTNNAK        | [Hex]5[HexNAc]4                  |
| 2+ | 1462.5743               | 1462.5690              | 4                | SDNFTNNAK        | [Hex]5 [HexNAc]4 [NeuAc]1        |
| 2+ | 1390.0546               | 1390.0503              | 3                | SDNFTNNAK        | [Hex]5[HexNAc]4[Fuc]1            |
| 2+ | 1535.6021               | 1535.5980              | 3                | SDNFTNNAK        | [Hex]5[HexNAc]4[Fuc]1[NeuAc]1    |
| 2+ | 1462.5760               | 1462.5690              | 5                | SDNFTNNAK        | [Hex]5[HexNAc]4[NeuAc]1          |
| 2+ | 1418.5547               | 1418.5610              | 4                | SDNFTNNAK        | [Hex]5[HexNAc]5                  |
| 2+ | 1491.5840               | 1491.5900              | 4                | SDNFTNNAK        | [Hex]5[HexNAc]5[Fuc]1            |
| 2+ | 1637.1362               | 1637.1377              | 1                | SDNFTNNAK        | [Hex]5[HexNAc]5[Fuc]1[NeuAc]1    |
| 2+ | 1593.1272               | 1593.1296              | 2                | SDNFTNNAK        | [Hex]5[HexNAc]6[Fuc]1            |
| 2+ | 1194.9694               | 1194.9684              | 1                | SDNFTNNAK        | [Hex]6[HexNAc]2                  |
| 2+ | 1515.0779               | 1515.0847              | 4                | SDNFTNNAK        | [Hex]6[HexNAc]3[Fuc]1[NeuAc]1    |
| 2+ | 1499.5854               | 1499.5874              | 1                | SDNFTNNAK        | [Hex]6[HexNAc]5                  |
| 2+ | 1572.6115               | 1572.6164              | 3                | SDNFTNNAK        | [Hex]6[HexNAc]5[Fuc]1            |
| 2+ | 1645.1275               | 1645.1351              | 5                | SDNFTNNAK        | [Hex]6[HexNAc]5[NeuAc]1          |
| 2+ | 1275.9958               | 1275.9948              | 1                | SDNFTNNAK        | [Hex]7[HexNAc]2                  |
| 2+ | 1827.6898               | 1827.7012              | 6                | SDNFTNNAK        | [Hex]7[HexNAc]6[NeuAc]1          |
| 2+ | 1357.0218               | 1357.0212              | 0.4              | SDNFTNNAK        | [Hex]8[HexNAc]2                  |
| 2+ | 1438.0498               | 1438.0476              | 2                | SDNFTNNAK        | [Hex]9[HexNAc]2                  |
|    |                         |                        |                  |                  |                                  |
| 3+ | 1121.0915               | 1121.0995              | 7                | SDNFTNNAK        | [Hex]5[HexNAc]4[Fuc]1[NeuAc]2    |

| CS | Experimental m/z | Theoretical m/z | Mass Error (ppm) | Peptide Sequence        | Glycan                        |
|----|------------------|-----------------|------------------|-------------------------|-------------------------------|
| 3+ | 1145.7786        | 1145.7785       | 0.1              | SDNFTNNAK               | [Hex]6[HexNAc]5[Fuc]1[NeuAc]1 |
| 3+ | 1242.8008        | 1242.8103       | 8                | SDNFTNNAK               | [Hex]6[HexNAc]5[Fuc]1[NeuAc]2 |
| 3+ | 1194.1199        | 1194.1243       | 4                | SDNFTNNAK               | [Hex]6[HexNAc]5[NeuAc]2       |
| 3+ | 1310.5031        | 1310.5034       | 0.2              | SDNFTNNAK               | [Hex]6[HexNAc]6[Fuc]1[NeuAc]2 |
| 3+ | 1364.5260        | 1364.5210       | 4                | SDNFTNNAK               | [Hex]7[HexNAc]6[Fuc]1[NeuAc]2 |
| 3+ | 1461.5414        | 1461.5528       | 8                | SDNFTNNAK               | [Hex]7[HexNAc]6[Fuc]1[NeuAc]3 |
| 3+ | 1315.8274        | 1315.8351       | 6                | SDNFTNNAK               | [Hex]7[HexNAc]6[NeuAc]2       |
|    |                  |                 |                  |                         |                               |
| 1+ | 1010.4572        | 1010.4538       | 3                | SDNFTNNAK               | non-glycosylated              |
|    |                  |                 |                  |                         |                               |
| 2+ | 807.3475         | 807.3459        | 2                | NVSTVQCTH               | [Hex]1[HexNAc]2               |
| 2+ | 888.3730         | 888.3724        | 1                | NVSTVQCTH               | [Hex]2[HexNAc]2               |
| 2+ | 969.4025         | 969.3988        | 4                | NVSTVQCTH               | [Hex]3[HexNAc]2               |
| 2+ | 1050.4296        | 1050.4252       | 4                | NVSTVQCTH               | [Hex]4[HexNAc]2               |
| 2+ | 1131.4544        | 1131.4516       | 2                | NVSTVQCTH               | [Hex]5[HexNAc]2               |
| 2+ | 1212.4797        | 1212.4780       | 1                | NVSTVQCTH               | [Hex]6[HexNAc]2               |
| 2+ | 1293.5068        | 1293.5044       | 2                | NVSTVQCTH               | [Hex]7[HexNAc]2               |
| 2+ | 1374.5324        | 1374.5308       | 1                | NVSTVQCTH               | [Hex]8[HexNAc]2               |
| 2+ | 1455.5615        | 1455.5572       | 3                | NVSTVQCTH               | [Hex]9[HexNAc]2               |
|    |                  |                 |                  |                         |                               |
| 2+ | 787.8845         | 787.8805        | 5                | NVSTVQCTHGIR            | [HexNAc]                      |
| 2+ | 889.4242         | 889.4229        | 1                | NVSTVQCTHGIR            | [HexNAc]2                     |
| 2+ | 970.4512         | 970.4493        | 2                | NVSTVQCTHGIR            | [Hex]1[HexNAc]2               |
| 2+ | 1051.4772        | 1051.4757       | 1                | NVSTVQCTHGIR            | [Hex]2[HexNAc]2               |
| 2+ | 1132.5036        | 1132.5021       | 1                | NVSTVQCTHGIR            | [Hex]3[HexNAc]2               |
| 2+ | 1213.5313        | 1213.5286       | 2                | NVSTVQCTHGIR            | [Hex]4[HexNAc]2               |
| 2+ | 1294.5563        | 1294.5549       | 1                | NVSTVQCTHGIR            | [Hex]5[HexNAc]2               |
| 2+ | 1375.5828        | 1375.5814       | 1                | NVSTVQCTHGIR            | [Hex]6[HexNAc]2               |
| 2+ | 1456.6107        | 1456.6078       | 2                | NVSTVQCTHGIR            | [Hex]7[HexNAc]2               |
| 2+ | 1537.6320        | 1537.6342       | 1                | NVSTVQCTHGIR            | [Hex]8[HexNAc]2               |
| 2+ | 1618.6602        | 1618.6606       | 0.2              | NVSTVQCTHGIR            | [Hex]9[HexNAc]2               |
|    |                  |                 |                  |                         |                               |
| 3+ | 939.4128         | 939.4094        | 4                | NVSTVQCTHGIR            | [Hex]3[HexNAc]4[Fuc]1         |
| 3+ | 1007.1070        | 1007.1025       | 4                | NVSTVQCTHGIR            | [Hex]3[HexNAc]5[Fuc]1         |
| 3+ | 944.7434         | 944.7410        | 3                | NVSTVQCTHGIR            | [Hex]4[HexNAc]4               |
| 3+ | 993.4345         | 993.4270        | 8                | NVSTVQCTHGIR            | [Hex]4[HexNAc]4 [Fuc]1        |
| 3+ | 1206.4971        | 1206.4978       | 1                | NVSTVQCTHGIR            | [Hex]4[HexNAc]5[NeuAc]2       |
| 3+ | 1095.7978        | 1095.7904       | 7                | NVSTVQCTHGIR            | [Hex]5 [HexNAc]4 [NeuAc]1     |
| 3+ | 998.7639         | 998.7586        | 5                | NVSTVQCTHGIR            | [Hex]5[HexNAc]4               |
| 3+ | 1047.4498        | 1047.4446       | 5                | NVSTVQCTHGIR            | [Hex]5[HexNAc]4[Fuc]1         |
| 3+ | 1066.4586        | 1066.4518       | 6                | NVSTVQCTHGIR            | [Hex]5[HexNAc]5               |
| 3+ | 1266.1912        | 1266.1871       | 3                | NVSTVQCTHGIR            | [Hex]6[HexNAc]5[Fuc]1[NeuAc]1 |
| 3+ | 1363.2238        | 1363.2189       | 4                | NVSTVQCTHGIR            | [Hex]6[HexNAc]5[Fuc]1[NeuAc]2 |
|    |                  |                 |                  |                         |                               |
| 2+ | 686.3451         | 686.3435        | 2                | NVSTVQCTHGIR            | non-glycosylated              |
|    |                  |                 |                  |                         |                               |
| 3+ | 932.5256         | 932.5201        | 6                | GIRPVVSTQLLNGLSLAEEVVIR | [HexNAc]                      |
| 3+ | 1000.2188        | 1000.2151       | 4                | GIRPVVSTQLLNGLSLAEEVVIR | [HexNAc]2                     |
| 3+ | 1054.2381        | 1054.2327       | 5                | GIRPVVSTQLLNGLSLAEEVVIR | [Hex]1[HexNAc]2               |
| 4+ | 831.4454         | 831.4395        | 7                | GIRPVVSTQLLNGLSLAEEVVIR | [Hex]2[HexNAc]2               |
| 4+ | 871.9611         | 871.9527        | 10               | GIRPVVSTQLLNGLSLAEEVVIR | [Hex]3[HexNAc]2               |
| 4+ | 912.4717         | 912.4660        | 6                | GIRPVVSTQLLNGLSLAEEVVIR | [Hex]4[HexNAc]2               |
| 4+ | 952.9835         | 952.9791        | 5                | GIRPVVSTQLLNGLSLAEEVVIR | [Hex]5[HexNAc]2               |
| 4+ | 993.4974         | 993.4924        | 5                | GIRPVVSTQLLNGLSLAEEVVIR | [Hex]6[HexNAc]2               |
| 4+ | 1034.0096        | 1034.0056       | 4                | GIRPVVSTQLLNGLSLAEEVVIR | [Hex]7[HexNAc]2               |
| 4+ | 1074.5217        | 1074.5188       | 3                | GIRPVVSTQLLNGLSLAEEVVIR | [Hex]8[HexNAc]2               |



| CS | Experimental m/z | Theoretical m/z | Mass Error (ppm) | Peptide Sequence                 | Glycan                         |
|----|------------------|-----------------|------------------|----------------------------------|--------------------------------|
| 4+ | 1115.0345        | 1115.0320       | 2                | GIRPVVSTQLLLNGSLAEEVVIR          | [Hex]9[HexNAc]2                |
| 2+ | 1296.7440        | 1296.7396       | 3                | GIRPVVSTQLLLNGSLAEEVVIR          | non-glycosylated               |
| 5+ | 1178.7583        | 1178.7498       | 7                | NVSTVQCTHGIRPVVSTQLLLNGSLAEEVVIR | [Hex]9[HexNAc]4                |
| 5+ | 1211.1620        | 1211.1604       | 1                | NVSTVQCTHGIRPVVSTQLLLNGSLAEEVVIR | [Hex]10[HexNAc]4               |
| 5+ | 1308.4038        | 1308.3921       | 9                | NVSTVQCTHGIRPVVSTQLLLNGSLAEEVVIR | [Hex]13[HexNAc]4               |
| 5+ | 1340.8097        | 1340.8026       | 5                | NVSTVQCTHGIRPVVSTQLLLNGSLAEEVVIR | [Hex]14[HexNAc]4               |
| 5+ | 1373.2241        | 1373.2132       | 8                | NVSTVQCTHGIRPVVSTQLLLNGSLAEEVVIR | [Hex]15[HexNAc]4               |
| 5+ | 1405.6309        | 1405.6238       | 5                | NVSTVQCTHGIRPVVSTQLLLNGSLAEEVVIR | [Hex]16[HexNAc]4               |
| 5+ | 1438.0409        | 1438.0343       | 5                | NVSTVQCTHGIRPVVSTQLLLNGSLAEEVVIR | [Hex]17[HexNAc]4               |
| 5+ | 1470.4566        | 1470.4449       | 8                | NVSTVQCTHGIRPVVSTQLLLNGSLAEEVVIR | [Hex]18[HexNAc]4               |
| 2+ | 1105.5013        | 1105.5031       | 2                | ESVEINTRPNNNTR                   | [HexNAc]2                      |
| 3+ | 1237.1804        | 1237.1718       | 7                | ESVEINTRPNNNTR                   | [Hex]8[HexNAc]3                |
| 3+ | 1358.8745        | 1358.8826       | 6                | ESVEINTRPNNNTR                   | [Hex]9[HexNAc]4                |
| 3+ | 1412.8923        | 1412.9002       | 6                | ESVEINTRPNNNTR                   | [Hex]10[HexNAc]4               |
| 3+ | 1466.9145        | 1466.9178       | 2                | ESVEINTRPNNNTR                   | [Hex]11[HexNAc]4               |
| 3+ | 1651.0014        | 1650.9900       | 7                | ESVEINTRPNNNTR                   | [Hex]11[HexNAc]6[Fuc]1         |
| 3+ | 1520.9293        | 1520.9354       | 4                | ESVEINTRPNNNTR                   | [Hex]12[HexNAc]4               |
| 3+ | 1588.6278        | 1588.6285       | 0.4              | ESVEINTRPNNNTR                   | [Hex]12[HexNAc]5               |
| 3+ | 1637.3147        | 1637.3145       | 0.1              | ESVEINTRPNNNTR                   | [Hex]12[HexNAc]5[Fuc]1         |
| 3+ | 1705.0170        | 1705.0076       | 6                | ESVEINTRPNNNTR                   | [Hex]12[HexNAc]6[Fuc]1         |
| 3+ | 1574.9524        | 1574.9530       | 0.4              | ESVEINTRPNNNTR                   | [Hex]13[HexNAc]4               |
| 3+ | 1642.6507        | 1642.6461       | 3                | ESVEINTRPNNNTR                   | [Hex]13[HexNAc]5               |
| 3+ | 1759.0305        | 1759.0252       | 3                | ESVEINTRPNNNTR                   | [Hex]13[HexNAc]6[Fuc]1         |
| 3+ | 1628.9659        | 1628.9706       | 3                | ESVEINTRPNNNTR                   | [Hex]14[HexNAc]4               |
| 3+ | 1813.0479        | 1813.0428       | 3                | ESVEINTRPNNNTR                   | [Hex]14[HexNAc]6[Fuc]1         |
| 3+ | 1910.0688        | 1910.0746       | 3                | ESVEINTRPNNNTR                   | [Hex]14[HexNAc]6[Fuc]1[NeuAc]1 |
| 3+ | 1682.9887        | 1682.9882       | 0.3              | ESVEINTRPNNNTR                   | [Hex]15[HexNAc]4               |
| 3+ | 1737.0086        | 1737.0058       | 2                | ESVEINTRPNNNTR                   | [Hex]16[HexNAc]4               |
| 3+ | 1791.0264        | 1791.0234       | 2                | ESVEINTRPNNNTR                   | [Hex]17[HexNAc]4               |
| 3+ | 1845.0404        | 1845.0410       | 0.3              | ESVEINTRPNNNTR                   | [Hex]18[HexNAc]4               |
| 3+ | 1899.0590        | 1899.0586       | 0.2              | ESVEINTRPNNNTR                   | [Hex]19[HexNAc]4               |
| 3+ | 1953.0818        | 1953.0762       | 3                | ESVEINTRPNNNTR                   | [Hex]20[HexNAc]4               |
| 4+ | 1424.5625        | 1424.5552       | 5                | ESVEINTRPNNNTR                   | [Hex]12[HexNAc]6[Fuc]1[NeuAc]2 |
| 4+ | 1465.0822        | 1465.0684       | 9                | ESVEINTRPNNNTR                   | [Hex]13[HexNAc]6[Fuc]1[NeuAc]2 |
| 4+ | 1382.0380        | 1382.0379       | 0.1              | ESVEINTRPNNNTR                   | [Hex]14[HexNAc]5[Fuc]1[NeuAc]1 |
| 4+ | 1546.0968        | 1546.0854       | 7                | ESVEINTRPNNNTR                   | [Hex]22[HexNAc]4               |
| 2+ | 1105.5013        | 1105.5031       | 2                | ESVEINTRPNNNTR                   | [HexNAc]2                      |
| 3+ | 1358.8745        | 1358.8826       | 6                | ESVEINTRPNNNTR                   | [Hex]9[HexNAc]4                |
| 3+ | 1412.8923        | 1412.9002       | 6                | ESVEINTRPNNNTR                   | [Hex]10[HexNAc]4               |
| 3+ | 1466.9145        | 1466.9178       | 2                | ESVEINTRPNNNTR                   | [Hex]11[HexNAc]4               |
| 3+ | 1520.9293        | 1520.9354       | 4                | ESVEINTRPNNNTR                   | [Hex]12[HexNAc]4               |
| 3+ | 1574.9524        | 1574.9530       | 0.4              | ESVEINTRPNNNTR                   | [Hex]13[HexNAc]4               |
| 3+ | 1628.9659        | 1628.9706       | 3                | ESVEINTRPNNNTR                   | [Hex]14[HexNAc]4               |
| 3+ | 1637.3147        | 1637.3145       | 0                | ESVEINTRPNNNTR                   | [Hex]12[HexNAc]5[Fuc]1         |
| 3+ | 1682.9828        | 1682.9882       | 3                | ESVEINTRPNNNTR                   | [Hex]15[HexNAc]4               |
| 3+ | 1704.9951        | 1705.0076       | 7                | ESVEINTRPNNNTR                   | [Hex]12[HexNAc]6[Fuc]1         |
| 3+ | 1737.0000        | 1737.0058       | 3                | ESVEINTRPNNNTR                   | [Hex]16[HexNAc]4               |
| 3+ | 1759.0404        | 1759.0252       | 9                | ESVEINTRPNNNTR                   | [Hex]13[HexNAc]6[Fuc]1         |
| 3+ | 1791.0201        | 1791.0234       | 2                | ESVEINTRPNNNTR                   | [Hex]17[HexNAc]4               |

| CS | Experimental<br><i>m/z</i> | Theoretical<br><i>m/z</i> | Mass<br>Error<br>(ppm) | Peptide Sequence | Glycan                         |
|----|----------------------------|---------------------------|------------------------|------------------|--------------------------------|
| 3+ | 1813.0479                  | 1813.0428                 | 3                      | ESVEINCTRPNNNTR  | [Hex]14[HexNAc]6[Fuc]1         |
| 3+ | 1845.0404                  | 1845.0410                 | 0.3                    | ESVEINCTRPNNNTR  | [Hex]18[HexNAc]4               |
| 3+ | 1910.0688                  | 1910.0746                 | 3                      | ESVEINCTRPNNNTR  | [Hex]14[HexNAc]6[Fuc]1[NeuAc]1 |
|    |                            |                           |                        |                  |                                |
| 3+ | 1628.9687                  | 1628.9706                 | 1                      | ESVEINCTRPNNNTR  | [Hex]14[HexNAc]4               |
| 3+ | 1682.9887                  | 1682.9882                 | 0.3                    | ESVEINCTRPNNNTR  | [Hex]15[HexNAc]4               |
| 3+ | 1737.0086                  | 1737.0058                 | 2                      | ESVEINCTRPNNNTR  | [Hex]16[HexNAc]4               |
| 3+ | 1791.0264                  | 1791.0234                 | 2                      | ESVEINCTRPNNNTR  | [Hex]17[HexNAc]4               |
| 3+ | 1845.0421                  | 1845.0410                 | 1                      | ESVEINCTRPNNNTR  | [Hex]18[HexNAc]4               |
| 3+ | 1899.0601                  | 1899.0586                 | 1                      | ESVEINCTRPNNNTR  | [Hex]19[HexNAc]4               |
| 3+ | 1953.0818                  | 1953.0762                 | 3                      | ESVEINCTRPNNNTR  | [Hex]20[HexNAc]4               |
|    |                            |                           |                        |                  |                                |
| 2+ | 1081.4450                  | 1081.4436                 | 1                      | ESVEINCTR        | [Hex]4[HexNAc]2                |
| 2+ | 1162.4732                  | 1162.4700                 | 3                      | ESVEINCTR        | [Hex]5[HexNAc]2                |
| 2+ | 1243.4973                  | 1243.4964                 | 1                      | ESVEINCTR        | [Hex]6[HexNAc]2                |
| 2+ | 1324.5201                  | 1324.5228                 | 2                      | ESVEINCTR        | [Hex]7[HexNAc]2                |
| 2+ | 1405.5474                  | 1405.5492                 | 1                      | ESVEINCTR        | [Hex]8[HexNAc]2                |
| 2+ | 1486.5741                  | 1486.5756                 | 1                      | ESVEINCTR        | [Hex]9[HexNAc]2                |
|    |                            |                           |                        |                  |                                |
| 3+ | 1075.1211                  | 1075.1190                 | 2                      | ESVEINCTRPNNNTR  | [Hex]5[HexNAc]3                |
| 3+ | 1356.2307                  | 1356.2230                 | 6                      | ESVEINCTRPNNNTR  | [Hex]5[HexNAc]5[Fuc]1[NeuAc]1  |
| 3+ | 1129.1393                  | 1129.1366                 | 2                      | ESVEINCTRPNNNTR  | [Hex]6[HexNAc]3                |
| 3+ | 1183.1530                  | 1183.1542                 | 1                      | ESVEINCTRPNNNTR  | [Hex]7[HexNAc]3                |
|    |                            |                           |                        |                  |                                |
| 2+ | 1442.1303                  | 1442.1245                 | 4                      | ESVEINCTRPNNNTR* | [Hex]2[HexNAc]3[Fuc]1          |
| 2+ | 1543.6719                  | 1543.6643                 | 5                      | ESVEINCTRPNNNTR* | [Hex]2[HexNAc]4[Fuc]1          |
| 2+ | 1523.1530                  | 1523.1510                 | 1                      | ESVEINCTRPNNNTR* | [Hex]3[HexNAc]3[Fuc]1          |
| 2+ | 1551.6601                  | 1551.6617                 | 1                      | ESVEINCTRPNNNTR* | [Hex]3[HexNAc]4                |
| 2+ | 1726.2296                  | 1726.2304                 | 0.5                    | ESVEINCTRPNNNTR* | [Hex]3[HexNAc]5[Fuc]1          |
|    |                            |                           |                        |                  |                                |
| 3+ | 718.3303                   | 718.3307                  | 1                      | ESVEINCTRPNNNTR* | [HexNAc][Fuc]                  |
| 3+ | 1083.4655                  | 1083.4629                 | 2                      | ESVEINCTRPNNNTR* | [Hex]3[HexNAc]4[Fuc]1          |
| 3+ | 1218.8523                  | 1218.8492                 | 3                      | ESVEINCTRPNNNTR* | [Hex]3[HexNAc]6[Fuc]1          |
| 3+ | 1137.4861                  | 1137.4805                 | 5                      | ESVEINCTRPNNNTR* | [Hex]4[HexNAc]4 [Fuc]1         |
| 3+ | 1234.5158                  | 1234.5123                 | 3                      | ESVEINCTRPNNNTR* | [Hex]4[HexNAc]4[Fuc]1[NeuAc]1  |
| 3+ | 1205.1735                  | 1205.1736                 | 0.1                    | ESVEINCTRPNNNTR* | [Hex]4[HexNAc]5[Fuc]1          |
| 3+ | 1302.2079                  | 1302.2054                 | 2                      | ESVEINCTRPNNNTR* | [Hex]4[HexNAc]5[Fuc]1[NeuAc]1  |
| 3+ | 1272.8679                  | 1272.8667                 | 1                      | ESVEINCTRPNNNTR* | [Hex]4[HexNAc]6[Fuc]1          |
| 3+ | 1075.1228                  | 1075.1190                 | 4                      | ESVEINCTRPNNNTR* | [Hex]5[HexNAc]3                |
| 3+ | 1210.5119                  | 1210.5053                 | 5                      | ESVEINCTRPNNNTR* | [Hex]5[HexNAc]5                |
| 3+ | 1259.1958                  | 1259.1912                 | 4                      | ESVEINCTRPNNNTR* | [Hex]5[HexNAc]5[Fuc]1          |
| 3+ | 1356.2244                  | 1356.2230                 | 1                      | ESVEINCTRPNNNTR* | [Hex]5[HexNAc]5[Fuc]1[NeuAc]1  |
| 3+ | 1453.2557                  | 1453.2548                 | 1                      | ESVEINCTRPNNNTR* | [Hex]5[HexNAc]5[Fuc]1[NeuAc]2  |
| 3+ | 1404.5699                  | 1404.5689                 | 1                      | ESVEINCTRPNNNTR* | [Hex]5[HexNAc]5[NeuAc]2        |
| 3+ | 1326.8855                  | 1326.8843                 | 1                      | ESVEINCTRPNNNTR* | [Hex]5[HexNAc]6[Fuc]1          |
| 3+ | 1423.9194                  | 1423.9161                 | 2                      | ESVEINCTRPNNNTR* | [Hex]5[HexNAc]6[Fuc]1[NeuAc]1  |
| 3+ | 1520.9511                  | 1520.9480                 | 2                      | ESVEINCTRPNNNTR* | [Hex]5[HexNAc]6[Fuc]1[NeuAc]2  |
| 3+ | 1313.2102                  | 1313.2088                 | 1                      | ESVEINCTRPNNNTR* | [Hex]6[HexNAc]5[Fuc]1          |
| 3+ | 1410.2426                  | 1410.2406                 | 1                      | ESVEINCTRPNNNTR* | [Hex]6[HexNAc]5[Fuc]1[NeuAc]1  |
| 3+ | 1507.2742                  | 1507.2724                 | 1                      | ESVEINCTRPNNNTR* | [Hex]6[HexNAc]5[Fuc]1[NeuAc]2  |
| 3+ | 1604.2951                  | 1604.3042                 | 6                      | ESVEINCTRPNNNTR* | [Hex]6[HexNAc]5[Fuc]1[NeuAc]3  |
| 3+ | 1380.9088                  | 1380.9020                 | 5                      | ESVEINCTRPNNNTR* | [Hex]6[HexNAc]6[Fuc]1          |
| 3+ | 1477.9307                  | 1477.9338                 | 2                      | ESVEINCTRPNNNTR* | [Hex]6[HexNAc]6[Fuc]1[NeuAc]1  |
| 3+ | 1574.9668                  | 1574.9656                 | 1                      | ESVEINCTRPNNNTR* | [Hex]6[HexNAc]6[Fuc]1[NeuAc]2  |
| 3+ | 1671.9986                  | 1671.9974                 | 1                      | ESVEINCTRPNNNTR* | [Hex]6[HexNAc]6[Fuc]1[NeuAc]3  |
| 3+ | 1531.9545                  | 1531.9514                 | 2                      | ESVEINCTRPNNNTR* | [Hex]7[HexNAc]6[Fuc]1[NeuAc]1  |



| CS | Experimental m/z | Theoretical m/z | Mass Error (ppm) | Peptide Sequence | Glycan                        |
|----|------------------|-----------------|------------------|------------------|-------------------------------|
| 3+ | 1599.6515        | 1599.6444       | 4                | ESVEINCTRPNNNTR* | [Hex]7[HexNAc]7[Fuc]1[NeuAc]1 |
| 3+ | 1696.6853        | 1696.6763       | 5                | ESVEINCTRPNNNTR* | [Hex]7[HexNAc]7[Fuc]1[NeuAc]2 |
| 3+ | 1793.7148        | 1793.7080       | 4                | ESVEINCTRPNNNTR* | [Hex]7[HexNAc]7[Fuc]1[NeuAc]3 |
|    |                  |                 |                  |                  |                               |
| 2+ | 902.4217         | 902.4237        | 2                | ESVEINCTRPNNNTR  | non-glycosylated              |
|    |                  |                 |                  |                  |                               |
| 2+ | 1306.0652        | 1306.0573       | 6                | NCSFNITTSIR*     | [Hex]3[HexNAc]4               |
| 2+ | 1379.0852        | 1379.0862       | 1                | NCSFNITTSIR*     | [Hex]3[HexNAc]4[Fuc]1         |
| 2+ | 1480.6290        | 1480.6260       | 2                | NCSFNITTSIR*     | [Hex]3[HexNAc]5[Fuc]1         |
| 3+ | 1055.1169        | 1055.1129       | 4                | NCSFNITTSIR*     | [Hex]3[HexNAc]6[Fuc]1         |
| 2+ | 1460.1070        | 1460.1127       | 4                | NCSFNITTSIR*     | [Hex]4[HexNAc]4 [Fuc]1        |
| 2+ | 1605.6487        | 1605.6604       | 7                | NCSFNITTSIR*     | [Hex]4[HexNAc]4[Fuc]1[NeuAc]1 |
| 2+ | 1561.6498        | 1561.6523       | 2                | NCSFNITTSIR*     | [Hex]4[HexNAc]5[Fuc]1         |
| 2+ | 1707.2036        | 1707.2001       | 2                | NCSFNITTSIR*     | [Hex]4[HexNAc]5[Fuc]1[NeuAc]1 |
| 2+ | 1569.6475        | 1569.6498       | 1                | NCSFNITTSIR*     | [Hex]5[HexNAc]5               |
| 2+ | 1642.6829        | 1642.6788       | 2                | NCSFNITTSIR*     | [Hex]5[HexNAc]5[Fuc]1         |
|    |                  |                 |                  |                  |                               |
| 3+ | 1192.4826        | 1192.4867       | 3                | NCSFNITTSIR*     | [Hex]5[HexNAc]5[Fuc]1[NeuAc]1 |
| 3+ | 1289.5173        | 1289.5185       | 1                | NCSFNITTSIR*     | [Hex]5[HexNAc]5[Fuc]1[NeuAc]2 |
| 3+ | 1163.1555        | 1163.1480       | 6                | NCSFNITTSIR*     | [Hex]5[HexNAc]6[Fuc]1         |
| 3+ | 1260.1875        | 1260.1798       | 6                | NCSFNITTSIR*     | [Hex]5[HexNAc]6[Fuc]1[NeuAc]1 |
| 3+ | 1246.5087        | 1246.5043       | 4                | NCSFNITTSIR*     | [Hex]6[HexNAc]5[Fuc]1[NeuAc]1 |
| 3+ | 1343.5382        | 1343.5361       | 2                | NCSFNITTSIR*     | [Hex]6[HexNAc]5[Fuc]1[NeuAc]2 |
| 3+ | 1314.2022        | 1314.1975       | 4                | NCSFNITTSIR*     | [Hex]6[HexNAc]6[Fuc]1[NeuAc]1 |
| 3+ | 1411.2313        | 1411.2293       | 1                | NCSFNITTSIR*     | [Hex]6[HexNAc]6[Fuc]1[NeuAc]2 |
| 3+ | 1532.9405        | 1532.9400       | 0.3              | NCSFNITTSIR*     | [Hex]7[HexNAc]7[Fuc]1[NeuAc]2 |

|    |           |           |     |          |                               |
|----|-----------|-----------|-----|----------|-------------------------------|
| 2+ | 939.3958  | 939.3938  | 2   | QAHCNISR | [Hex]3[HexNAc]2               |
| 2+ | 1020.4194 | 1020.4203 | 1   | QAHCNISR | [Hex]4[HexNAc]2               |
| 2+ | 1101.4483 | 1101.4466 | 2   | QAHCNISR | [Hex]5[HexNAc]2               |
| 2+ | 1182.4740 | 1182.4731 | 1   | QAHCNISR | [Hex]6[HexNAc]2               |
| 2+ | 1263.5016 | 1263.4995 | 1.7 | QAHCNISR | [Hex]7[HexNAc]2               |
| 2+ | 1344.5254 | 1344.5259 | 0.4 | QAHCNISR | [Hex]8[HexNAc]2               |
| 2+ | 1425.5496 | 1425.5523 | 2   | QAHCNISR | [Hex]9[HexNAc]2               |
|    |           |           |     |          |                               |
| 1+ | 968.4403  | 968.4366  | 4   | QAHCNISR | non-glycosylated              |
|    |           |           |     |          |                               |
| 2+ | 591.7826  | 591.7799  | 5   | WNDTLK   | [HexNAc]2                     |
| 2+ | 672.8093  | 672.8063  | 4   | WNDTLK   | [Hex]1[HexNAc]2               |
| 2+ | 753.8358  | 753.8327  | 4   | WNDTLK   | [Hex]2[HexNAc]2               |
| 2+ | 834.8638  | 834.8591  | 6   | WNDTLK   | [Hex]3[HexNAc]2               |
| 2+ | 1037.9438 | 1037.9385 | 5   | WNDTLK   | [Hex]3[HexNAc]4               |
| 2+ | 1110.9713 | 1110.9674 | 4   | WNDTLK   | [Hex]3[HexNAc]4[Fuc]1         |
| 2+ | 1212.5127 | 1212.5072 | 5   | WNDTLK   | [Hex]3[HexNAc]5[Fuc]1         |
| 2+ | 1314.0550 | 1314.0469 | 6   | WNDTLK   | [Hex]3[HexNAc]6[Fuc]1         |
| 2+ | 915.8904  | 915.8856  | 5   | WNDTLK   | [Hex]4[HexNAc]2               |
| 2+ | 1017.4333 | 1017.4252 | 8   | WNDTLK   | [Hex]4[HexNAc]3               |
| 2+ | 1191.9958 | 1191.9939 | 2   | WNDTLK   | [Hex]4[HexNAc]4 [Fuc]1        |
| 2+ | 1337.5592 | 1337.5416 | 13  | WNDTLK   | [Hex]4[HexNAc]4[Fuc]1[NeuAc]1 |
| 2+ | 1439.0817 | 1439.0813 | 0.3 | WNDTLK   | [Hex]4[HexNAc]5[Fuc]1[NeuAc]1 |
| 2+ | 996.9178  | 996.9119  | 6   | WNDTLK   | [Hex]5[HexNAc]2               |
| 2+ | 1098.4544 | 1098.4516 | 3   | WNDTLK   | [Hex]5[HexNAc]3               |
| 2+ | 1418.5864 | 1418.5680 | 13  | WNDTLK   | [Hex]5[HexNAc]4[Fuc]1[NeuAc]1 |
| 2+ | 1564.1173 | 1564.1157 | 1   | WNDTLK   | [Hex]5[HexNAc]4[Fuc]1[NeuAc]2 |
| 2+ | 1077.9443 | 1077.9384 | 5   | WNDTLK   | [Hex]6[HexNAc]2               |
| 2+ | 1746.6846 | 1746.6818 | 2   | WNDTLK   | [Hex]6[HexNAc]5[Fuc]1[NeuAc]2 |

| CS | Experimental m/z | Theoretical m/z | Mass Error (ppm) | Peptide Sequence | Glycan                        |
|----|------------------|-----------------|------------------|------------------|-------------------------------|
| 2+ | 1158.9716        | 1158.9648       | 6                | WNDTLK           | [Hex]7[HexNAc]2               |
| 2+ | 1239.9947        | 1239.9912       | 3                | WNDTLK           | [Hex]8[HexNAc]2               |
| 2+ | 1321.0201        | 1321.0176       | 2                | WNDTLK           | [Hex]9[HexNAc]2               |
| 2+ | 1402.0559        | 1402.0440       | 8                | WNDTLK           | [Hex]10[HexNAc]2              |
| 3+ | 1286.5018        | 1286.5010       | 1                | WNDTLK           | [Hex]7[HexNAc]6[Fuc]1[NeuAc]2 |
|    |                  |                 |                  |                  |                               |
| 3+ | 1383.5349        | 1383.5328       | 2                | WNDTLK           | [Hex]7[HexNAc]6[Fuc]1[NeuAc]3 |
|    |                  |                 |                  |                  |                               |
| 1+ | 776.3958         | 776.3937        | 3                | WNDTLK           | non-glycosylated              |
| 2+ | 388.7006         | 388.7005        | 0.3              | WNDTLK           | non-glycosylated              |
|    |                  |                 |                  |                  |                               |
| 2+ | 1005.8993        | 1005.8990       | 0.3              | EQFENK           | [Hex]5[HexNAc]2               |
| 2+ | 1086.9264        | 1086.9255       | 1                | EQFENK           | [Hex]6[HexNAc]2               |
| 2+ | 1167.9502        | 1167.9519       | 1                | EQFENK           | [Hex]7[HexNAc]2               |
| 2+ | 1248.9779        | 1248.9783       | 0.3              | EQFENK           | [Hex]8[HexNAc]2               |
|    |                  |                 |                  |                  |                               |
| 2+ | 633.8193         | 633.8171        | 3                | LREQFENK         | [HexNAc]                      |
| 2+ | 706.8488         | 706.8488        | 0                | LREQFENK         | [HexNAc][Fuc]                 |
| 2+ | 735.3611         | 735.3596        | 2                | LREQFENK         | [HexNAc]2                     |
| 2+ | 816.3876         | 816.3859        | 2                | LREQFENK         | [Hex]1[HexNAc]2               |
| 2+ | 1071.9799        | 1071.9810       | 1                | LREQFENK         | [Hex]2[HexNAc]3[Fuc]1         |
| 2+ | 897.4148         | 897.4124        | 3                | LREQFENK         | [Hex]2[HexNAc]2               |
| 2+ | 978.4415         | 978.4388        | 3                | LREQFENK         | [Hex]3[HexNAc]2               |
| 2+ | 1051.4772        | 1051.4677       | 9                | LREQFENK         | [Hex]3[HexNAc]2[Fuc]1         |
| 2+ | 1153.0062        | 1153.0074       | 1                | LREQFENK         | [Hex]3[HexNAc]3[Fuc]1         |
| 2+ | 1254.5480        | 1254.5471       | 1                | LREQFENK         | [Hex]3[HexNAc]4[Fuc]1         |
| 2+ | 1356.0876        | 1356.0868       | 1                | LREQFENK         | [Hex]3[HexNAc]5[Fuc]1         |
| 2+ | 1457.6354        | 1457.6265       | 6                | LREQFENK         | [Hex]3[HexNAc]6[Fuc]1         |
| 2+ | 1059.4678        | 1059.4652       | 2                | LREQFENK         | [Hex]4[HexNAc]2               |
| 2+ | 1132.5036        | 1132.4941       | 8                | LREQFENK         | [Hex]4[HexNAc]2[Fuc]1         |
| 2+ | 1234.0338        | 1234.0338       | 0                | LREQFENK         | [Hex]4[HexNAc]3[Fuc]1         |
| 2+ | 1379.5782        | 1379.5815       | 2                | LREQFENK         | [Hex]4[HexNAc]3[Fuc]1[NeuAc]1 |
| 2+ | 1335.5745        | 1335.5735       | 1                | LREQFENK         | [Hex]4[HexNAc]4[Fuc]1         |
| 2+ | 1481.1233        | 1481.1212       | 1                | LREQFENK         | [Hex]4[HexNAc]4[Fuc]1[NeuAc]1 |
| 2+ | 1437.1122        | 1437.1132       | 1                | LREQFENK         | [Hex]4[HexNAc]5[Fuc]1         |
| 2+ | 1416.5988        | 1416.5999       | 1                | LREQFENK         | [Hex]5[HexNAc]4[Fuc]1         |
| 2+ | 1562.1500        | 1562.1476       | 2                | LREQFENK         | [Hex]5[HexNAc]4[Fuc]1[NeuAc]1 |
| 2+ | 1707.6973        | 1707.6953       | 1                | LREQFENK         | [Hex]5[HexNAc]4[Fuc]1[NeuAc]2 |
| 2+ | 1744.7140        | 1744.7137       | 0.2              | LREQFENK         | [Hex]6[HexNAc]5[Fuc]1[NeuAc]1 |
| 2+ | 1464.6004        | 1464.5972       | 2                | LREQFENK         | [Hex]9[HexNAc]2               |
| 2+ | 1545.6256        | 1545.6236       | 1                | LREQFENK         | [Hex]10[HexNAc]2              |
|    |                  |                 |                  |                  |                               |
| 3+ | 788.0146         | 788.0145        | 0.1              | LREQFENK         | [Hex]3[HexNAc]4               |
| 3+ | 871.3785         | 871.3708        | 9                | LREQFENK         | [Hex]4[HexNAc]3[NeuAc]1       |
| 3+ | 1055.4416        | 1055.4431       | 1                | LREQFENK         | [Hex]4[HexNAc]5[Fuc]1[NeuAc]1 |
| 3+ | 1123.1386        | 1123.1362       | 2                | LREQFENK         | [Hex]4[HexNAc]6[Fuc]1[NeuAc]1 |
| 3+ | 993.0828         | 993.0816        | 1                | LREQFENK         | [Hex]5[HexNAc]4[NeuAc]1       |
| 3+ | 828.3507         | 828.3566        | 7                | LREQFENK         | [Hex]5[HexNAc]3               |
| 3+ | 877.0424         | 877.0426        | 0.2              | LREQFENK         | [Hex]5[HexNAc]3[Fuc]1         |
| 3+ | 1012.4342        | 1012.4289       | 5                | LREQFENK         | [Hex]5[HexNAc]5[Fuc]1         |
| 3+ | 1109.4621        | 1109.4607       | 1                | LREQFENK         | [Hex]5[HexNAc]5[Fuc]1[NeuAc]1 |
| 3+ | 1206.4953        | 1206.4925       | 2                | LREQFENK         | [Hex]5[HexNAc]5[Fuc]1[NeuAc]2 |
| 3+ | 1177.1613        | 1177.1538       | 6                | LREQFENK         | [Hex]5[HexNAc]6[Fuc]1[NeuAc]1 |
| 3+ | 1274.1980        | 1274.1856       | 10               | LREQFENK         | [Hex]5[HexNAc]6[Fuc]1[NeuAc]2 |
| 3+ | 1028.0894        | 1028.0920       | 3                | LREQFENK         | [Hex]6[HexNAc]3[Fuc]1[NeuAc]1 |
| 3+ | 1260.5123        | 1260.5101       | 2                | LREQFENK         | [Hex]6[HexNAc]5[Fuc]1[NeuAc]2 |

| CS | Experimental m/z | Theoretical m/z | Mass Error (ppm) | Peptide Sequence  | Glycan                        |
|----|------------------|-----------------|------------------|-------------------|-------------------------------|
| 3+ | 1357.5410        | 1357.5419       | 1                | LREQFENK          | [Hex]6[HexNAc]5[Fuc]1[NeuAc]3 |
| 3+ | 1231.1733        | 1231.1714       | 2                | LREQFENK          | [Hex]6[HexNAc]6[Fuc]1[NeuAc]1 |
| 3+ | 1328.2029        | 1328.2032       | 0.2              | LREQFENK          | [Hex]6[HexNAc]6[Fuc]1[NeuAc]2 |
| 3+ | 1425.2314        | 1425.2350       | 3                | LREQFENK          | [Hex]6[HexNAc]6[Fuc]1[NeuAc]3 |
| 3+ | 1285.1889        | 1285.1890       | 0.1              | LREQFENK          | [Hex]7[HexNAc]6[Fuc]1[NeuAc]1 |
| 3+ | 1382.2235        | 1382.2208       | 2                | LREQFENK          | [Hex]7[HexNAc]6[Fuc]1[NeuAc]2 |
| 3+ | 1479.2551        | 1479.2526       | 2                | LREQFENK          | [Hex]7[HexNAc]6[Fuc]1[NeuAc]3 |
| 3+ | 1576.2725        | 1576.2844       | 8                | LREQFENK          | [Hex]7[HexNAc]6[Fuc]1[NeuAc]4 |
| 3+ | 1546.9455        | 1546.9457       | 0.1              | LREQFENK          | [Hex]7[HexNAc]7[Fuc]1[NeuAc]3 |
| 3+ | 1406.9018        | 1406.8997       | 1                | LREQFENK          | [Hex]8[HexNAc]7[Fuc]1[NeuAc]1 |
| 3+ | 1503.9365        | 1503.9315       | 3                | LREQFENK          | [Hex]8[HexNAc]7[Fuc]1[NeuAc]2 |
| 3+ | 1600.9632        | 1600.9633       | 0.1              | LREQFENK          | [Hex]8[HexNAc]7[Fuc]1[NeuAc]3 |
| 3+ | 1697.9963        | 1697.9951       | 1                | LREQFENK          | [Hex]8[HexNAc]7[Fuc]1[NeuAc]4 |
| 3+ | 1625.6362        | 1625.6423       | 4                | LREQFENK          | [Hex]9[HexNAc]8[Fuc]1[NeuAc]2 |
| 3+ | 1722.6869        | 1722.6741       | 7                | LREQFENK          | [Hex]9[HexNAc]8[Fuc]1[NeuAc]3 |
| 3+ | 1819.6970        | 1819.7059       | 5                | LREQFENK          | [Hex]9[HexNAc]8[Fuc]1[NeuAc]4 |
|    |                  |                 |                  |                   |                               |
| 2+ | 532.2806         | 532.2802        | 1                | LREQFENK          | non-glycosylated              |
|    |                  |                 |                  |                   |                               |
| 2+ | 892.8880         | 892.8828        | 6                | TIVFNH            | [Hex]4[HexNAc]2               |
| 2+ | 973.9144         | 973.9092        | 5                | TIVFNH            | [Hex]5[HexNAc]2               |
| 2+ | 1054.9410        | 1054.9356       | 5                | TIVFNH            | [Hex]6[HexNAc]2               |
| 2+ | 1135.9688        | 1135.9620       | 6                | TIVFNH            | [Hex]7[HexNAc]2               |
| 2+ | 1216.9930        | 1216.9884       | 4                | TIVFNH            | [Hex]8[HexNAc]2               |
| 2+ | 1298.0225        | 1298.0148       | 6                | TIVFNH            | [Hex]9[HexNAc]2               |
| 2+ | 1379.0458        | 1379.0412       | 3                | TIVFNH            | [Hex]10[HexNAc]2              |
|    |                  |                 |                  |                   |                               |
| 3+ | 942.0515         | 942.0497        | 2                | NHSSGGDPEIVMH     | [Hex]3[HexNAc]4[Fuc]1         |
| 3+ | 933.7140         | 933.7059        | 9                | NHSSGGDPEIVMH     | [Hex]5[HexNAc]3               |
|    |                  |                 |                  |                   |                               |
| 2+ | 1447.6274        | 1447.6234       | 3                | TIVFNHSSGGDPEIVMH | [Hex]4[HexNAc]2               |
| 2+ | 1528.6542        | 1528.6497       | 3                | TIVFNHSSGGDPEIVMH | [Hex]5[HexNAc]2               |
| 2+ | 1609.6811        | 1609.6762       | 3                | TIVFNHSSGGDPEIVMH | [Hex]6[HexNAc]2               |
| 2+ | 1690.6980        | 1690.7026       | 3                | TIVFNHSSGGDPEIVMH | [Hex]7[HexNAc]2               |
| 2+ | 1852.7577        | 1852.7554       | 1                | TIVFNHSSGGDPEIVMH | [Hex]9[HexNAc]2               |
|    |                  |                 |                  |                   |                               |
| 3+ | 681.6563         | 681.6526        | 5                | TIVFNHSSGGDPEIVMH | [HexNAc]                      |
| 3+ | 749.3499         | 749.3476        | 3                | TIVFNHSSGGDPEIVMH | [HexNAc]2                     |
| 3+ | 803.3681         | 803.3652        | 4                | TIVFNHSSGGDPEIVMH | [Hex]1[HexNAc]2               |
| 3+ | 857.3854         | 857.3828        | 3                | TIVFNHSSGGDPEIVMH | [Hex]2[HexNAc]2               |
| 3+ | 911.4041         | 911.4004        | 4                | TIVFNHSSGGDPEIVMH | [Hex]3[HexNAc]2               |
| 3+ | 1181.4906        | 1181.4884       | 2                | TIVFNHSSGGDPEIVMH | [Hex]8[HexNAc]2               |
| 3+ | 1289.5254        | 1289.5236       | 1                | TIVFNHSSGGDPEIVMH | [Hex]10[HexNAc]2              |
| 3+ | 1343.5359        | 1343.5413       | 4                | TIVFNHSSGGDPEIVMH | [Hex]11[HexNAc]2              |
|    |                  |                 |                  |                   |                               |
| 2+ | 920.4404         | 920.4383        | 2                | TIVFNHSSGGDPEIVMH | non-glycosylated              |
|    |                  |                 |                  |                   |                               |
| 2+ | 1043.9177        | 1043.9114       | 6                | YCNSTQLF          | [Hex]4[HexNAc]2               |
| 2+ | 1124.9413        | 1124.9378       | 3                | YCNSTQLF          | [Hex]5[HexNAc]2               |
| 2+ | 1205.9699        | 1205.9642       | 5                | YCNSTQLF          | [Hex]6[HexNAc]2               |
| 2+ | 1286.9954        | 1286.9906       | 4                | YCNSTQLF          | [Hex]7[HexNAc]2               |
| 2+ | 1368.0212        | 1368.0170       | 3                | YCNSTQLF          | [Hex]8[HexNAc]2               |
| 2+ | 1449.0477        | 1449.0434       | 3                | YCNSTQLF          | [Hex]9[HexNAc]2               |
| 2+ | 1530.0713        | 1530.0698       | 1                | YCNSTQLF          | [Hex]10[HexNAc]2              |
|    |                  |                 |                  |                   |                               |
| 2+ | 943.3605         | 943.3514        | 10               | NSTW              | [Hex]6[HexNAc]2               |

| CS | Experimental m/z | Theoretical m/z | Mass Error (ppm) | Peptide Sequence     | Glycan                        |
|----|------------------|-----------------|------------------|----------------------|-------------------------------|
| 2+ | 1105.4114        | 1105.4042       | 7                | NSTW                 | [Hex]8[HexNAc]2               |
| 2+ | 1186.4373        | 1186.4306       | 6                | NSTW                 | [Hex]9[HexNAc]2               |
| 2+ | 1267.4672        | 1267.4570       | 8                | NSTW                 | [Hex]10[HexNAc]2              |
|    |                  |                 |                  |                      |                               |
| 4+ | 1241.4989        | 1241.4880       | 9                | NNNTEGSNNTEGNTITLPCR | [Hex]12[HexNAc]4              |
| 4+ | 1282.0080        | 1282.0012       | 5                | NNNTEGSNNTEGNTITLPCR | [Hex]13[HexNAc]4              |
| 4+ | 1322.5239        | 1322.5144       | 7                | NNNTEGSNNTEGNTITLPCR | [Hex]14[HexNAc]4              |
| 4+ | 1363.0340        | 1363.0276       | 5                | NNNTEGSNNTEGNTITLPCR | [Hex]15[HexNAc]4              |
| 4+ | 1403.5490        | 1403.5408       | 6                | NNNTEGSNNTEGNTITLPCR | [Hex]16[HexNAc]4              |
| 4+ | 1444.0623        | 1444.0540       | 6                | NNNTEGSNNTEGNTITLPCR | [Hex]17[HexNAc]4              |
| 4+ | 1484.5675        | 1484.5672       | 0.2              | NNNTEGSNNTEGNTITLPCR | [Hex]18[HexNAc]4              |
| 4+ | 1525.0914        | 1525.0804       | 7                | NNNTEGSNNTEGNTITLPCR | [Hex]19[HexNAc]4              |
| 4+ | 1565.5997        | 1565.5936       | 4                | NNNTEGSNNTEGNTITLPCR | [Hex]20[HexNAc]4              |
|    |                  |                 |                  |                      |                               |
| 2+ | 769.3993         | 769.3954        | 5                | CSSNITGLLLTR         | [HexNAc]                      |
| 2+ | 870.9394         | 870.9379        | 2                | CSSNITGLLLTR         | [HexNAc]2                     |
| 3+ | 634.9791         | 634.9786        | 1                | CSSNITGLLLTR         | [Hex]1[HexNAc]2               |
| 2+ | 1032.9928        | 1032.9907       | 2                | CSSNITGLLLTR         | [Hex]2[HexNAc]2               |
| 3+ | 743.0143         | 743.0138        | 1                | CSSNITGLLLTR         | [Hex]3[HexNAc]2               |
| 3+ | 797.0322         | 797.0314        | 1                | CSSNITGLLLTR         | [Hex]4[HexNAc]2               |
| 2+ | 1276.0730        | 1276.0699       | 2                | CSSNITGLLLTR         | [Hex]5[HexNAc]2               |
| 2+ | 1357.0970        | 1357.0963       | 1                | CSSNITGLLLTR         | [Hex]6[HexNAc]2               |
| 2+ | 1438.1255        | 1438.1227       | 2                | CSSNITGLLLTR         | [Hex]7[HexNAc]2               |
| 3+ | 1013.1030        | 1013.1018       | 1                | CSSNITGLLLTR         | [Hex]8[HexNAc]2               |
| 2+ | 1600.1757        | 1600.1755       | 0.1              | CSSNITGLLLTR         | [Hex]9[HexNAc]2               |
| 2+ | 1681.2055        | 1681.2019       | 2                | CSSNITGLLLTR         | [Hex]10[HexNAc]2              |
|    |                  |                 |                  |                      |                               |
| 2+ | 667.8590         | 667.8585        | 1                | CSSNITGLLLTR         | non-glycosylated              |
|    |                  |                 |                  |                      |                               |
| 2+ | 1397.0636        | 1397.0794       | 11               | CSSNITGLLLTR         | [Hex]6[HexNAc]2[PO3]1         |
| 2+ | 1478.0908        | 1478.1058       | 10               | CSSNITGLLLTR         | [Hex]7[HexNAc]2[PO3]1         |
|    |                  |                 |                  |                      |                               |
| 3+ | 765.6813         | 765.6799        | 2                | DGGINENGTEIFRPGGGDMR | [HexNAc]                      |
| 2+ | 1249.5601        | 1249.5587       | 1                | DGGINENGTEIFRPGGGDMR | [HexNAc]2                     |
| 3+ | 887.3943         | 887.3924        | 2                | DGGINENGTEIFRPGGGDMR | [Hex]1[HexNAc]2               |
| 3+ | 941.4133         | 941.4101        | 3                | DGGINENGTEIFRPGGGDMR | [Hex]2[HexNAc]2               |
| 3+ | 995.4305         | 995.4277        | 3                | DGGINENGTEIFRPGGGDMR | [Hex]3[HexNAc]2               |
| 3+ | 1111.8117        | 1111.8068       | 4                | DGGINENGTEIFRPGGGDMR | [Hex]3[HexNAc]3[Fuc]1         |
| 3+ | 1179.5018        | 1179.4999       | 2                | DGGINENGTEIFRPGGGDMR | [Hex]3[HexNAc]4[Fuc]1         |
| 3+ | 1247.1918        | 1247.1930       | 1                | DGGINENGTEIFRPGGGDMR | [Hex]3[HexNAc]5[Fuc]1         |
| 3+ | 1314.8842        | 1314.8862       | 2                | DGGINENGTEIFRPGGGDMR | [Hex]3[HexNAc]6[Fuc]1         |
| 3+ | 1049.4491        | 1049.4453       | 4                | DGGINENGTEIFRPGGGDMR | [Hex]4[HexNAc]2               |
| 3+ | 1165.8238        | 1165.8244       | 1                | DGGINENGTEIFRPGGGDMR | [Hex]4[HexNAc]3[Fuc]1         |
| 3+ | 1233.5175        | 1233.5175       | 0                | DGGINENGTEIFRPGGGDMR | [Hex]4[HexNAc]4[Fuc]1         |
| 3+ | 1330.5484        | 1330.5493       | 1                | DGGINENGTEIFRPGGGDMR | [Hex]4[HexNAc]4[Fuc]1[NeuAc]1 |
| 3+ | 1301.2078        | 1301.2106       | 2                | DGGINENGTEIFRPGGGDMR | [Hex]4[HexNAc]5[Fuc]1         |
| 3+ | 1398.2425        | 1398.2424       | 0.1              | DGGINENGTEIFRPGGGDMR | [Hex]4[HexNAc]5[Fuc]1[NeuAc]1 |
| 3+ | 1465.9348        | 1465.9356       | 1                | DGGINENGTEIFRPGGGDMR | [Hex]4[HexNAc]6[Fuc]1[NeuAc]1 |
| 3+ | 1103.4672        | 1103.4629       | 4                | DGGINENGTEIFRPGGGDMR | [Hex]5[HexNAc]2               |
| 3+ | 1287.5422        | 1287.5351       | 6                | DGGINENGTEIFRPGGGDMR | [Hex]5[HexNAc]4[Fuc]1         |
| 3+ | 1384.5671        | 1384.5669       | 0.1              | DGGINENGTEIFRPGGGDMR | [Hex]5[HexNAc]4[Fuc]1[NeuAc]1 |
| 3+ | 1481.6090        | 1481.5987       | 7                | DGGINENGTEIFRPGGGDMR | [Hex]5[HexNAc]4[Fuc]1[NeuAc]2 |
| 3+ | 1452.2573        | 1452.2600       | 2                | DGGINENGTEIFRPGGGDMR | [Hex]5[HexNAc]5[Fuc]1[NeuAc]1 |
| 3+ | 1549.2779        | 1549.2918       | 9                | DGGINENGTEIFRPGGGDMR | [Hex]5[HexNAc]5[Fuc]1[NeuAc]2 |
| 3+ | 1422.9266        | 1422.9213       | 4                | DGGINENGTEIFRPGGGDMR | [Hex]5[HexNAc]6[Fuc]1         |
| 3+ | 1519.9526        | 1519.9531       | 0.3              | DGGINENGTEIFRPGGGDMR | [Hex]5[HexNAc]6[Fuc]1[NeuAc]1 |

| CS | Experimental m/z | Theoretical m/z | Mass Error (ppm) | Peptide Sequence     | Glycan                          |
|----|------------------|-----------------|------------------|----------------------|---------------------------------|
| 3+ | 1616.9888        | 1616.9850       | 2                | DGGINENGTEIFRPGGGDMR | [Hex]5[HexNAc]6[Fuc]1[NeuAc]2   |
| 3+ | 1157.4843        | 1157.4805       | 3                | DGGINENGTEIFRPGGGDMR | [Hex]6[HexNAc]2                 |
| 3+ | 1409.2447        | 1409.2458       | 1                | DGGINENGTEIFRPGGGDMR | [Hex]6[HexNAc]5[Fuc]1           |
| 3+ | 1506.2785        | 1506.2776       | 1                | DGGINENGTEIFRPGGGDMR | [Hex]6[HexNAc]5[Fuc]1[NeuAc]1   |
| 3+ | 1603.3158        | 1603.3094       | 4                | DGGINENGTEIFRPGGGDMR | [Hex]6[HexNAc]5[Fuc]1[NeuAc]2   |
| 3+ | 1700.3347        | 1700.3412       | 4                | DGGINENGTEIFRPGGGDMR | [Hex]6[HexNAc]5[Fuc]1[NeuAc]3   |
| 3+ | 1573.9811        | 1573.9708       | 7                | DGGINENGTEIFRPGGGDMR | [Hex]6[HexNAc]6[Fuc]1[NeuAc]1   |
| 3+ | 1671.0049        | 1671.0026       | 1                | DGGINENGTEIFRPGGGDMR | [Hex]6[HexNAc]6[Fuc]1[NeuAc]2   |
| 3+ | 1768.0339        | 1768.0344       | 0.3              | DGGINENGTEIFRPGGGDMR | [Hex]6[HexNAc]6[Fuc]1[NeuAc]3   |
| 3+ | 1641.6471        | 1641.6639       | 10               | DGGINENGTEIFRPGGGDMR | [Hex]6[HexNAc]7[Fuc]1[NeuAc]1   |
| 3+ | 1801.7256        | 1801.7291       | 2                | DGGINENGTEIFRPGGGDMR | [Hex]7[HexNAc]10[Fuc]1          |
| 3+ | 1211.5024        | 1211.4981       | 4                | DGGINENGTEIFRPGGGDMR | [Hex]7[HexNAc]2                 |
| 3+ | 1627.9797        | 1627.9884       | 5                | DGGINENGTEIFRPGGGDMR | [Hex]7[HexNAc]6[Fuc]1[NeuAc]1   |
| 3+ | 1725.0030        | 1725.0202       | 10               | DGGINENGTEIFRPGGGDMR | [Hex]7[HexNAc]6[Fuc]1[NeuAc]2   |
| 3+ | 1822.0512        | 1822.0520       | 0.4              | DGGINENGTEIFRPGGGDMR | [Hex]7[HexNAc]6[Fuc]1[NeuAc]3   |
|    | 1439.5634        | 1439.5647       | 1                | DGGINENGTEIFRPGGGDMR | [Hex]7[HexNAc]6[Fuc]1[NeuAc]4   |
| 4+ | 1344.7912        | 1344.7868       | 3                | DGGINENGTEIFRPGGGDMR | [Hex]7[HexNAc]7[Fuc]1[NeuAc]2   |
| 4+ | 1417.5618        | 1417.5606       | 1                | DGGINENGTEIFRPGGGDMR | [Hex]7[HexNAc]7[Fuc]1[NeuAc]3   |
| 3+ | 1265.5192        | 1265.5157       | 3                | DGGINENGTEIFRPGGGDMR | [Hex]8[HexNAc]2                 |
| 4+ | 1312.5377        | 1312.5261       | 9                | DGGINENGTEIFRPGGGDMR | [Hex]8[HexNAc]7[Fuc]1[NeuAc]1   |
| 3+ | 1846.7370        | 1846.7309       | 3                | DGGINENGTEIFRPGGGDMR | [Hex]8[HexNAc]7[Fuc]1[NeuAc]2   |
| 4+ | 1458.0760        | 1458.0738       | 2                | DGGINENGTEIFRPGGGDMR | [Hex]8[HexNAc]7[Fuc]1[NeuAc]3   |
| 4+ | 1530.8514        | 1530.8477       | 2                | DGGINENGTEIFRPGGGDMR | [Hex]8[HexNAc]7[Fuc]1[NeuAc]4   |
| 3+ | 1319.5388        | 1319.5333       | 4                | DGGINENGTEIFRPGGGDMR | [Hex]9[HexNAc]2                 |
| 3+ | 1373.5585        | 1373.5509       | 6                | DGGINENGTEIFRPGGGDMR | [Hex]10[HexNAc]2                |
| 3+ | 1427.5766        | 1427.5685       | 6                | DGGINENGTEIFRPGGGDMR | [Hex]11[HexNAc]2                |
|    |                  |                 |                  |                      |                                 |
| 2+ | 1046.4805        | 1046.4792       | 1                | DGGINENGTEIFRPGGGDMR | non-glycosylated                |
|    |                  |                 |                  |                      |                                 |
| 3+ | 1211.5185        | 1211.5199       | 1                | LICTTAVPWNASWSNK     | [Hex]6[HexNAc]4                 |
| 3+ | 1265.5333        | 1265.5375       | 3                | LICTTAVPWNASWSNK     | [Hex]7[HexNAc]4                 |
| 5+ | 1094.2470        | 1094.2544       | 7                | LICTTAVPWNASWSNK     | [Hex]8[HexNAc]10[Fuc]2          |
| 3+ | 1319.5507        | 1319.5551       | 3                | LICTTAVPWNASWSNK     | [Hex]8[HexNAc]4                 |
| 4+ | 1251.5171        | 1251.5160       | 1                | LICTTAVPWNASWSNK     | [Hex]8[HexNAc]7[Fuc]1[NeuAc]1   |
| 4+ | 1030.4327        | 1030.4314       | 1                | LICTTAVPWNASWSNK     | [Hex]9[HexNAc]4                 |
| 4+ | 1306.5311        | 1306.5397       | 7                | LICTTAVPWNASWSNK     | [Hex]9[HexNAc]8[Fuc]2           |
| 3+ | 1427.5894        | 1427.5904       | 1                | LICTTAVPWNASWSNK     | [Hex]10[HexNAc]4                |
| 3+ | 1495.2804        | 1495.2835       | 2                | LICTTAVPWNASWSNK     | [Hex]10[HexNAc]5                |
| 3+ | 1611.6637        | 1611.6626       | 1                | LICTTAVPWNASWSNK     | [Hex]10[HexNAc]6[Fuc]1          |
| 4+ | 1296.2801        | 1296.2831       | 2                | LICTTAVPWNASWSNK     | [Hex]10[HexNAc]7[Fuc]2          |
| 3+ | 1481.6076        | 1481.6080       | 0.3              | LICTTAVPWNASWSNK     | [Hex]11[HexNAc]4                |
| 4+ | 1162.2185        | 1162.2276       | 8                | LICTTAVPWNASWSNK     | [Hex]11[HexNAc]5                |
| 3+ | 1762.7082        | 1762.7120       | 2                | LICTTAVPWNASWSNK     | [Hex]11[HexNAc]6[Fuc]1[NeuAc]1  |
| 4+ | 1300.2739        | 1300.2818       | 6                | LICTTAVPWNASWSNK     | [Hex]11[HexNAc]7[Fuc]1          |
| 4+ | 1511.1139        | 1511.1098       | 3                | LICTTAVPWNASWSNK     | [Hex]11[HexNAc]9[Fuc]2[NeuAc]1  |
| 4+ | 1602.3980        | 1602.3928       | 3                | LICTTAVPWNASWSNK     | [Hex]12[HexNAc]10[Fuc]2[NeuAc]1 |
| 4+ | 1151.9744        | 1151.9710       | 3                | LICTTAVPWNASWSNK     | [Hex]12[HexNAc]4                |
| 4+ | 1192.4814        | 1192.4842       | 2                | LICTTAVPWNASWSNK     | [Hex]13[HexNAc]4                |
| 3+ | 1657.3305        | 1657.3363       | 3                | LICTTAVPWNASWSNK     | [Hex]13[HexNAc]5                |
| 3+ | 1919.0892        | 1919.0930       | 2                | LICTTAVPWNASWSNK     | [Hex]13[HexNAc]6[NeuAc]2        |
| 3+ | 1643.6570        | 1643.6608       | 2                | LICTTAVPWNASWSNK     | [Hex]14[HexNAc]4                |
| 3+ | 1711.3529        | 1711.3539       | 1                | LICTTAVPWNASWSNK     | [Hex]14[HexNAc]5                |
| 4+ | 1443.8226        | 1443.8254       | 2                | LICTTAVPWNASWSNK     | [Hex]14[HexNAc]6[Fuc]1[NeuAc]1  |
| 3+ | 1697.6729        | 1697.6784       | 3                | LICTTAVPWNASWSNK     | [Hex]15[HexNAc]4                |
| 4+ | 1314.0253        | 1314.0238       | 1                | LICTTAVPWNASWSNK     | [Hex]16[HexNAc]4                |
| 4+ | 1575.6237        | 1575.6217       | 1                | LICTTAVPWNASWSNK     | [Hex]16[HexNAc]7[Fuc]1[NeuAc]1  |

| CS | Experimental m/z | Theoretical m/z | Mass Error (ppm) | Peptide Sequence  | Glycan                        |
|----|------------------|-----------------|------------------|-------------------|-------------------------------|
| 3+ | 1805.7148        | 1805.7136       | 1                | LICTTAVPWNASWSNK  | [Hex]17[HexNAc]4              |
| 3+ | 1859.7319        | 1859.7312       | 0.4              | LICTTAVPWNASWSNK  | [Hex]18[HexNAc]4              |
| 3+ | 1913.7494        | 1913.7488       | 0.3              | LICTTAVPWNASWSNK  | [Hex]19[HexNAc]4              |
| 4+ | 1476.0800        | 1476.0861       | 4                | LICTTAVPWNASWSNK  | [Hex]20[HexNAc]4              |
| 4+ | 1516.5964        | 1516.5898       | 4                | LICTTAVPWNASWSNK  | [Hex]21[HexNAc]4              |
|    |                  |                 |                  |                   |                               |
| 2+ | 1026.0013        | 1025.9960       | 5                | LICTTAVPWNASWSNK  | [HexNAc]                      |
| 3+ | 752.0279         | 752.0281        | 0.3              | LICTTAVPWNASWSNK  | [HexNAc]2                     |
| 2+ | 1099.0322        | 1099.0277       | 4                | LICTTAVPWNASWSNK  | [HexNAc][Fuc]                 |
| 3+ | 806.0471         | 806.0456        | 2                | LICTTAVPWNASWSNK  | [Hex]1[HexNAc]2               |
| 3+ | 860.0656         | 860.0633        | 3                | LICTTAVPWNASWSNK  | [Hex]2[HexNAc]2               |
| 2+ | 1370.6183        | 1370.6177       | 0.4              | LICTTAVPWNASWSNK  | [Hex]3[HexNAc]2               |
| 2+ | 1451.6467        | 1451.6441       | 2                | LICTTAVPWNASWSNK  | [Hex]4[HexNAc]2               |
| 3+ | 1035.7895        | 1035.7916       | 2                | LICTTAVPWNASWSNK  | [Hex]4[HexNAc]3               |
| 2+ | 1626.2244        | 1626.2127       | 7                | LICTTAVPWNASWSNK  | [Hex]4[HexNAc]3[Fuc]1         |
| 3+ | 1181.4932        | 1181.5094       | 14               | LICTTAVPWNASWSNK  | [Hex]4[HexNAc]3[Fuc]1[NeuAc]1 |
| 3+ | 1103.4863        | 1103.4847       | 1                | LICTTAVPWNASWSNK  | [Hex]4[HexNAc]4               |
| 2+ | 1532.6723        | 1532.6705       | 1                | LICTTAVPWNASWSNK  | [Hex]5[HexNAc]2               |
| 2+ | 1634.2133        | 1634.2102       | 2                | LICTTAVPWNASWSNK  | [Hex]5[HexNAc]3               |
| 3+ | 1235.5114        | 1235.5270       | 13               | LICTTAVPWNASWSNK  | [Hex]5[HexNAc]3[Fuc]1[NeuAc]1 |
| 3+ | 1157.5052        | 1157.5023       | 3                | LICTTAVPWNASWSNK  | [Hex]5[HexNAc]4               |
| 3+ | 1206.1979        | 1206.1883       | 8                | LICTTAVPWNASWSNK  | [Hex]5[HexNAc]4[Fuc]1         |
| 3+ | 1303.2359        | 1303.2201       | 12               | LICTTAVPWNASWSNK  | [Hex]5[HexNAc]4[Fuc]1[NeuAc]1 |
| 3+ | 1351.5617        | 1351.5660       | 3                | LICTTAVPWNASWSNK  | [Hex]5[HexNAc]4[NeuAc]2       |
| 2+ | 1613.6990        | 1613.6969       | 1                | LICTTAVPWNASWSNK  | [Hex]6[HexNAc]2               |
| 3+ | 1143.8348        | 1143.8268       | 7                | LICTTAVPWNASWSNK  | [Hex]6[HexNAc]3               |
| 3+ | 1192.4980        | 1192.5128       | 12               | LICTTAVPWNASWSNK  | [Hex]6[HexNAc]3[Fuc]1         |
| 2+ | 1694.7202        | 1694.7233       | 2                | LICTTAVPWNASWSNK  | [Hex]7[HexNAc]2               |
| 3+ | 1197.8541        | 1197.8444       | 8                | LICTTAVPWNASWSNK  | [Hex]7[HexNAc]3               |
| 2+ | 1775.7482        | 1775.7497       | 1                | LICTTAVPWNASWSNK  | [Hex]8[HexNAc]2               |
| 3+ | 1238.1868        | 1238.1865       | 0.2              | LICTTAVPWNASWSNK  | [Hex]9[HexNAc]2               |
| 3+ | 1292.2121        | 1292.2041       | 6                | LICTTAVPWNASWSNK  | [Hex]10[HexNAc]2              |
|    |                  |                 |                  |                   |                               |
| 2+ | 924.4630         | 924.4590        | 4                | LICTTAVPWNASWSNK  | non-glycosylated              |
|    |                  |                 |                  |                   |                               |
| 3+ | 1098.1561        | 1098.1531       | 3                | LICTTAVPWNASWSNK* | [Hex]3[HexNAc]4[Fuc]1         |
| 3+ | 1165.8508        | 1165.8462       | 4                | LICTTAVPWNASWSNK* | [Hex]3[HexNAc]5[Fuc]1         |
| 3+ | 1233.5419        | 1233.5394       | 2                | LICTTAVPWNASWSNK* | [Hex]3[HexNAc]6[Fuc]1         |
| 3+ | 1152.1744        | 1152.1707       | 3                | LICTTAVPWNASWSNK* | [Hex]4[HexNAc]4[Fuc]1         |
| 3+ | 1249.2039        | 1249.2025       | 1                | LICTTAVPWNASWSNK* | [Hex]4[HexNAc]4[Fuc]1[NeuAc]1 |
| 3+ | 1219.8661        | 1219.8638       | 2                | LICTTAVPWNASWSNK* | [Hex]4[HexNAc]5[Fuc]1         |
| 3+ | 1316.8990        | 1316.8956       | 3                | LICTTAVPWNASWSNK* | [Hex]4[HexNAc]5[Fuc]1[NeuAc]1 |
| 3+ | 1206.1869        | 1206.1883       | 1                | LICTTAVPWNASWSNK* | [Hex]5[HexNAc]4[Fuc]1         |
| 3+ | 1303.2233        | 1303.2201       | 2                | LICTTAVPWNASWSNK* | [Hex]5[HexNAc]4[Fuc]1[NeuAc]1 |
| 3+ | 1400.2550        | 1400.2519       | 2                | LICTTAVPWNASWSNK* | [Hex]5[HexNAc]4[Fuc]1[NeuAc]2 |
| 3+ | 1273.8842        | 1273.8814       | 2                | LICTTAVPWNASWSNK* | [Hex]5[HexNAc]5[Fuc]1         |
| 3+ | 1370.9137        | 1370.9132       | 0.4              | LICTTAVPWNASWSNK* | [Hex]5[HexNAc]5[Fuc]1[NeuAc]1 |
| 3+ | 1467.9524        | 1467.9450       | 5                | LICTTAVPWNASWSNK* | [Hex]5[HexNAc]5[Fuc]1[NeuAc]2 |
| 3+ | 1327.9017        | 1327.8990       | 2                | LICTTAVPWNASWSNK* | [Hex]6[HexNAc]5[Fuc]1         |
| 3+ | 1424.9308        | 1424.9308       | 0                | LICTTAVPWNASWSNK* | [Hex]6[HexNAc]5[Fuc]1[NeuAc]1 |
| 3+ | 1521.9628        | 1521.9626       | 0.1              | LICTTAVPWNASWSNK* | [Hex]6[HexNAc]5[Fuc]1[NeuAc]2 |
| 3+ | 1618.9949        | 1618.9944       | 0.3              | LICTTAVPWNASWSNK* | [Hex]6[HexNAc]5[Fuc]1[NeuAc]3 |
| 3+ | 1395.5980        | 1395.5922       | 4                | LICTTAVPWNASWSNK* | [Hex]6[HexNAc]6[Fuc]1         |
| 3+ | 1492.6294        | 1492.6240       | 4                | LICTTAVPWNASWSNK* | [Hex]6[HexNAc]6[Fuc]1[NeuAc]1 |
| 3+ | 1589.6547        | 1589.6558       | 1                | LICTTAVPWNASWSNK* | [Hex]6[HexNAc]6[Fuc]1[NeuAc]2 |
| 3+ | 1449.6141        | 1449.6098       | 3                | LICTTAVPWNASWSNK* | [Hex]7[HexNAc]6[Fuc]1         |



| CS | Experimental m/z | Theoretical m/z | Mass Error (ppm) | Peptide Sequence       | Glycan                        |
|----|------------------|-----------------|------------------|------------------------|-------------------------------|
| 3+ | 1546.6452        | 1546.6416       | 2                | LICTTAVPWNASWSNK*      | [Hex]7[HexNAc]6[Fuc]1[NeuAc]1 |
| 3+ | 1643.6774        | 1643.6734       | 2                | LICTTAVPWNASWSNK*      | [Hex]7[HexNAc]6[Fuc]1[NeuAc]2 |
| 3+ | 1740.7070        | 1740.7052       | 1                | LICTTAVPWNASWSNK*      | [Hex]7[HexNAc]6[Fuc]1[NeuAc]3 |
| 3+ | 1614.3251        | 1614.3346       | 6                | LICTTAVPWNASWSNK*      | [Hex]7[HexNAc]7[Fuc]1[NeuAc]1 |
| 3+ | 1711.3776        | 1711.3665       | 6                | LICTTAVPWNASWSNK*      | [Hex]7[HexNAc]7[Fuc]1[NeuAc]2 |
| 3+ | 1571.3203        | 1571.3205       | 0.1              | LICTTAVPWNASWSNK*      | [Hex]8[HexNAc]7[Fuc]1         |
| 3+ | 1668.3544        | 1668.3523       | 1                | LICTTAVPWNASWSNK*      | [Hex]8[HexNAc]7[Fuc]1[NeuAc]1 |
| 3+ | 1765.3860        | 1765.3841       | 1                | LICTTAVPWNASWSNK*      | [Hex]8[HexNAc]7[Fuc]1[NeuAc]2 |
| 4+ | 1397.0658        | 1397.0637       | 2                | LICTTAVPWNASWSNK*      | [Hex]8[HexNAc]7[Fuc]1[NeuAc]3 |
| 3+ | 1790.0653        | 1790.0630       | 1                | LICTTAVPWNASWSNK*      | [Hex]9[HexNAc]8[Fuc]1[NeuAc]1 |
| 4+ | 1488.3548        | 1488.3468       | 5                | LICTTAVPWNASWSNK*      | [Hex]9[HexNAc]8[Fuc]1[NeuAc]3 |
|    |                  |                 |                  |                        |                               |
| 2+ | 949.9166         | 949.9109        | 6                | IWNNMTWMEWER           | [HexNAc]                      |
| 2+ | 1051.4572        | 1051.4534       | 4                | IWNNMTWMEWER           | [HexNAc]2                     |
| 3+ | 755.3238         | 755.3222        | 2                | IWNNMTWMEWER           | [Hex]1[HexNAc]2               |
| 2+ | 1213.5102        | 1213.5062       | 3                | IWNNMTWMEWER           | [Hex]2[HexNAc]2               |
| 2+ | 1294.5332        | 1294.5326       | 0.5              | IWNNMTWMEWER           | [Hex]3[HexNAc]2               |
| 3+ | 863.3576         | 863.3575        | 0.1              | IWNNMTWMEWER           | [Hex]3[HexNAc]2               |
| 2+ | 1469.1143        | 1469.1012       | 9                | IWNNMTWMEWER           | [Hex]3[HexNAc]3[Fuc]1         |
| 2+ | 1570.6447        | 1570.6409       | 2                | IWNNMTWMEWER           | [Hex]3[HexNAc]4[Fuc]1         |
| 2+ | 1375.5564        | 1375.5590       | 2                | IWNNMTWMEWER           | [Hex]4[HexNAc]2               |
| 3+ | 985.0651         | 985.0682        | 3                | IWNNMTWMEWER           | [Hex]4[HexNAc]3               |
| 2+ | 1550.1232        | 1550.1276       | 3                | IWNNMTWMEWER           | [Hex]4[HexNAc]3[Fuc]1         |
| 3+ | 1101.4491        | 1101.4473       | 2                | IWNNMTWMEWER           | [Hex]4[HexNAc]4 [Fuc]1        |
| 3+ | 1198.4859        | 1198.4791       | 6                | IWNNMTWMEWER           | [Hex]4[HexNAc]4[Fuc]1[NeuAc]1 |
| 3+ | 1203.8109        | 1203.8107       | 0.2              | IWNNMTWMEWER           | [Hex]5 [HexNAc]4 [NeuAc]1     |
| 2+ | 1456.5852        | 1456.5854       | 0.1              | IWNNMTWMEWER           | [Hex]5[HexNAc]2               |
| 3+ | 1039.0942        | 1039.0858       | 8                | IWNNMTWMEWER           | [Hex]5[HexNAc]3               |
| 3+ | 1087.7760        | 1087.7718       | 4                | IWNNMTWMEWER           | [Hex]5[HexNAc]3[Fuc]1         |
| 3+ | 1106.7820        | 1106.7789       | 3                | IWNNMTWMEWER           | [Hex]5[HexNAc]4               |
| 3+ | 1155.4690        | 1155.4649       | 4                | IWNNMTWMEWER           | [Hex]5[HexNAc]4[Fuc]1         |
| 3+ | 1252.5012        | 1252.4967       | 4                | IWNNMTWMEWER           | [Hex]5[HexNAc]4[Fuc]1[NeuAc]1 |
| 3+ | 1349.5324        | 1349.5285       | 3                | IWNNMTWMEWER           | [Hex]5[HexNAc]4[Fuc]1[NeuAc]2 |
| 3+ | 1223.1624        | 1223.1580       | 4                | IWNNMTWMEWER           | [Hex]5[HexNAc]5[Fuc]1         |
| 3+ | 1320.1833        | 1320.1898       | 5                | IWNNMTWMEWER           | [Hex]5[HexNAc]5[Fuc]1[NeuAc]1 |
| 2+ | 1537.6132        | 1537.6118       | 1                | IWNNMTWMEWER           | [Hex]6[HexNAc]2               |
| 3+ | 1093.0944        | 1093.1034       | 8                | IWNNMTWMEWER           | [Hex]6[HexNAc]3               |
| 3+ | 1277.1802        | 1277.1756       | 4                | IWNNMTWMEWER           | [Hex]6[HexNAc]5[Fuc]1         |
| 3+ | 1374.2105        | 1374.2074       | 2                | IWNNMTWMEWER           | [Hex]6[HexNAc]5[Fuc]1[NeuAc]1 |
| 3+ | 1471.2376        | 1471.2392       | 1                | IWNNMTWMEWER           | [Hex]6[HexNAc]5[Fuc]1[NeuAc]2 |
| 3+ | 1344.8739        | 1344.8688       | 4                | IWNNMTWMEWER           | [Hex]6[HexNAc]6[Fuc]1         |
| 2+ | 1618.6392        | 1618.6382       | 1                | IWNNMTWMEWER           | [Hex]7[HexNAc]2               |
| 3+ | 1147.1159        | 1147.1210       | 4                | IWNNMTWMEWER           | [Hex]7[HexNAc]3               |
| 3+ | 1495.9276        | 1495.9182       | 6                | IWNNMTWMEWER           | [Hex]7[HexNAc]6[Fuc]1[NeuAc]1 |
| 3+ | 1592.9535        | 1592.9500       | 2                | IWNNMTWMEWER           | [Hex]7[HexNAc]6[Fuc]1[NeuAc]2 |
| 2+ | 1699.6671        | 1699.6646       | 1                | IWNNMTWMEWER           | [Hex]8[HexNAc]2               |
| 2+ | 1780.6874        | 1780.6910       | 2                | IWNNMTWMEWER           | [Hex]9[HexNAc]2               |
| 2+ | 1861.6905        | 1861.7174       | 14               | IWNNMTWMEWER           | [Hex]10[HexNAc]2              |
| 3+ | 1295.4989        | 1295.4983       | 0.5              | IWNNMTWMEWER           | [Hex]11[HexNAc]2              |
|    |                  |                 |                  |                        |                               |
| 2+ | 848.8689         | 848.8660        | 3.4              | IWNNMTWMEWER           | non-glycosylated              |
|    |                  |                 |                  |                        |                               |
| 3+ | 959.7789         | 959.7750        | 4                | EIDNYTSEIYTLIEESQNQQEK | [HexNAc]                      |
| 3+ | 1008.4701        | 1008.4628       | 7                | EIDNYTSEIYTLIEESQNQQEK | [HexNAc][Fuc]                 |
| 3+ | 1081.4937        | 1081.4876       | 6                | EIDNYTSEIYTLIEESQNQQEK | [Hex]1[HexNAc]2               |
| 3+ | 1135.5118        | 1135.5052       | 6                | EIDNYTSEIYTLIEESQNQQEK | [Hex]2[HexNAc]2               |

| CS                            | Experimental<br><i>m/z</i> | Theoretical<br><i>m/z</i> | Mass<br>Error<br>(ppm) | Peptide Sequence       | Glycan                        |
|-------------------------------|----------------------------|---------------------------|------------------------|------------------------|-------------------------------|
| 3+                            | 1189.5303                  | 1189.5228                 | 6                      | EIDNYTSEIYTLIEESQNQQEK | [Hex]3[HexNAc]2               |
| 3+                            | 1373.5950                  | 1373.5950                 | 0                      | EIDNYTSEIYTLIEESQNQQEK | [Hex]3[HexNAc]4[Fuc]1         |
| 3+                            | 1243.5481                  | 1243.5404                 | 6                      | EIDNYTSEIYTLIEESQNQQEK | [Hex]4[HexNAc]2               |
| 3+                            | 1427.6209                  | 1427.6126                 | 6                      | EIDNYTSEIYTLIEESQNQQEK | [Hex]4[HexNAc]4[Fuc]1         |
| 3+                            | 1297.5628                  | 1297.5580                 | 4                      | EIDNYTSEIYTLIEESQNQQEK | [Hex]5[HexNAc]2               |
| 3+                            | 1481.6335                  | 1481.6302                 | 2                      | EIDNYTSEIYTLIEESQNQQEK | [Hex]5[HexNAc]4[Fuc]1         |
| 3+                            | 1578.6741                  | 1578.6620                 | 8                      | EIDNYTSEIYTLIEESQNQQEK | [Hex]5[HexNAc]4[Fuc]1[NeuAc]1 |
| 3+                            | 1675.7031                  | 1675.6938                 | 6                      | EIDNYTSEIYTLIEESQNQQEK | [Hex]5[HexNAc]4[Fuc]1[NeuAc]2 |
| 3+                            | 1549.3239                  | 1549.3234                 | 0.3                    | EIDNYTSEIYTLIEESQNQQEK | [Hex]5[HexNAc]5[Fuc]1         |
| 3+                            | 1351.5883                  | 1351.5756                 | 9                      | EIDNYTSEIYTLIEESQNQQEK | [Hex]6[HexNAc]2               |
| 3+                            | 1603.3537                  | 1603.3410                 | 8                      | EIDNYTSEIYTLIEESQNQQEK | [Hex]6[HexNAc]5[Fuc]1         |
| 4+                            | 1275.5392                  | 1275.5314                 | 6                      | EIDNYTSEIYTLIEESQNQQEK | [Hex]6[HexNAc]5[Fuc]1[NeuAc]1 |
| 4+                            | 1348.3096                  | 1348.3052                 | 3                      | EIDNYTSEIYTLIEESQNQQEK | [Hex]6[HexNAc]5[Fuc]1[NeuAc]2 |
| 3+                            | 1671.0476                  | 1671.0341                 | 8                      | EIDNYTSEIYTLIEESQNQQEK | [Hex]6[HexNAc]6[Fuc]1         |
| 4+                            | 1326.3085                  | 1326.3012                 | 6                      | EIDNYTSEIYTLIEESQNQQEK | [Hex]6[HexNAc]6[Fuc]1[NeuAc]1 |
| 4+                            | 1377.0636                  | 1377.0711                 | 5                      | EIDNYTSEIYTLIEESQNQQEK | [Hex]6[HexNAc]7[Fuc]1[NeuAc]1 |
| 3+                            | 1405.5997                  | 1405.5932                 | 5                      | EIDNYTSEIYTLIEESQNQQEK | [Hex]7[HexNAc]2               |
| 3+                            | 1725.0548                  | 1725.0517                 | 2                      | EIDNYTSEIYTLIEESQNQQEK | [Hex]7[HexNAc]6[Fuc]1         |
| 4+                            | 1366.8177                  | 1366.8144                 | 2                      | EIDNYTSEIYTLIEESQNQQEK | [Hex]7[HexNAc]6[Fuc]1[NeuAc]1 |
| 4+                            | 1439.5985                  | 1439.5883                 | 7                      | EIDNYTSEIYTLIEESQNQQEK | [Hex]7[HexNAc]6[Fuc]1[NeuAc]2 |
| 4+                            | 1512.3683                  | 1512.3621                 | 4                      | EIDNYTSEIYTLIEESQNQQEK | [Hex]7[HexNAc]6[Fuc]1[NeuAc]3 |
| 3+                            | 1459.6199                  | 1459.6108                 | 6                      | EIDNYTSEIYTLIEESQNQQEK | [Hex]8[HexNAc]2               |
| 4+                            | 1458.0975                  | 1458.0975                 | 0                      | EIDNYTSEIYTLIEESQNQQEK | [Hex]8[HexNAc]7[Fuc]1[NeuAc]1 |
| 4+                            | 1530.8740                  | 1530.8713                 | 2                      | EIDNYTSEIYTLIEESQNQQEK | [Hex]8[HexNAc]7[Fuc]1[NeuAc]2 |
| 3+                            | 1513.6390                  | 1513.6284                 | 7                      | EIDNYTSEIYTLIEESQNQQEK | [Hex]9[HexNAc]2               |
| 3+                            | 1567.6541                  | 1567.6460                 | 5                      | EIDNYTSEIYTLIEESQNQQEK | [Hex]10[HexNAc]2              |
|                               |                            |                           |                        |                        |                               |
| 2+                            | 1337.6272                  | 1337.6219                 | 4                      | EIDNYTSEIYTLIEESQNQQEK | non-glycosylated              |
|                               |                            |                           |                        |                        |                               |
| <b>O-linked glycopeptides</b> |                            |                           |                        |                        |                               |
| 2+                            | 614.3462                   | 614.3452                  | 2                      | IEPLGVAPTK             | [HexNAc]1                     |
| 2+                            | 695.3732                   | 695.3716                  | 2                      | IEPLGVAPTK             | [Hex]1[HexNAc]1               |
| 2+                            | 840.9215                   | 840.9193                  | 3                      | IEPLGVAPTK             | [Hex]1[HexNAc]1[NeuAc]1       |
| 2+                            | 986.4707                   | 986.4670                  | 4                      | IEPLGVAPTK             | [Hex]1[HexNAc]1[NeuAc]2       |
|                               |                            |                           |                        |                        |                               |
| 2+                            | 512.8070                   | 512.8055                  | 3                      | IEPLGVAPTK             | non-glycosylated              |
|                               |                            |                           |                        |                        |                               |
| 2+                            | 632.3204                   | 632.3181                  | 4                      | LICTTAVPW              | [HexNAc]1                     |
| 2+                            | 858.8965                   | 858.8922                  | 5                      | LICTTAVPW              | [Hex]1[HexNAc]1[NeuAc]1       |
| 2+                            | 1004.4472                  | 1004.4399                 | 7                      | LICTTAVPW              | [Hex]1[HexNAc]1[NeuAc]2       |
|                               |                            |                           |                        |                        |                               |
| 2+                            | 530.7810                   | 530.7784                  | 5                      | LICTTAVPW              | non-glycosylated              |
|                               |                            |                           |                        |                        |                               |
| 3+                            | 684.9929                   | 684.9909                  | 3                      | LICTTAVPWDASWSDK       | [HexNAc]1                     |
| 3+                            | 836.0424                   | 836.0403                  | 3                      | LICTTAVPWDASWSDK       | [Hex]1[HexNAc]1[NeuAc]1       |
| 3+                            | 933.0763                   | 933.0721                  | 5                      | LICTTAVPWDASWSDK       | [Hex]1[HexNAc]1[NeuAc]2       |
|                               |                            |                           |                        |                        |                               |
| 2+                            | 925.4451                   | 925.4430                  | 2                      | LICTTAVPWDASWSDK       | non-glycosylated              |

**Table S1B. N- and O-linked glycopeptide compositions of membrane-anchored Env(-) $\Delta$ 712 obtained from preparation 2**

| CS | Experimental <i>m/z</i> | Theoretical <i>m/z</i> | Mass Error (ppm) | Peptide Sequence                      | Glycan                        |
|----|-------------------------|------------------------|------------------|---------------------------------------|-------------------------------|
| 4+ | 1171.0441               | 1171.0390              | 4                | AYDTEVHNVWATHACVPTDNPQEVVLENVTEHFNMWK | [HexNAc]                      |
| 4+ | 1221.8076               | 1221.8103              | 2                | AYDTEVHNVWATHACVPTDNPQEVVLENVTEHFNMWK | [HexNAc]2                     |
| 4+ | 1262.3154               | 1262.3234              | 6                | AYDTEVHNVWATHACVPTDNPQEVVLENVTEHFNMWK | [Hex]1[HexNAc]2               |
| 4+ | 1424.3805               | 1424.3763              | 3                | AYDTEVHNVWATHACVPTDNPQEVVLENVTEHFNMWK | [Hex]5[HexNAc]2               |
| 4+ | 1464.9003               | 1464.8895              | 7                | AYDTEVHNVWATHACVPTDNPQEVVLENVTEHFNMWK | [Hex]6[HexNAc]2               |
| 5+ | 1074.8790               | 1074.8813              | 2                | AYDTEVHNVWATHACVPTDNPQEVVLENVTEHFNMWK | [Hex]3[HexNAc]2               |
| 5+ | 1156.1082               | 1156.1131              | 4                | AYDTEVHNVWATHACVPTDNPQEVVLENVTEHFNMWK | [Hex]3[HexNAc]4               |
| 5+ | 1185.3282               | 1185.3247              | 3                | AYDTEVHNVWATHACVPTDNPQEVVLENVTEHFNMWK | [Hex]3[HexNAc]4[Fuc]1         |
| 5+ | 1225.9361               | 1225.9406              | 4                | AYDTEVHNVWATHACVPTDNPQEVVLENVTEHFNMWK | [Hex]3[HexNAc]5[Fuc]1         |
| 5+ | 1266.5504               | 1266.5564              | 5                | AYDTEVHNVWATHACVPTDNPQEVVLENVTEHFNMWK | [Hex]3[HexNAc]6[Fuc]1         |
| 5+ | 1107.2929               | 1107.2919              | 1                | AYDTEVHNVWATHACVPTDNPQEVVLENVTEHFNMWK | [Hex]4[HexNAc]2               |
| 5+ | 1147.9179               | 1147.9078              | 9                | AYDTEVHNVWATHACVPTDNPQEVVLENVTEHFNMWK | [Hex]4[HexNAc]3               |
| 5+ | 1188.5182               | 1188.5237              | 5                | AYDTEVHNVWATHACVPTDNPQEVVLENVTEHFNMWK | [Hex]4[HexNAc]4               |
| 5+ | 1217.7276               | 1217.7352              | 6                | AYDTEVHNVWATHACVPTDNPQEVVLENVTEHFNMWK | [Hex]4[HexNAc]4 [Fuc]1        |
| 5+ | 1275.9585               | 1275.9543              | 3                | AYDTEVHNVWATHACVPTDNPQEVVLENVTEHFNMWK | [Hex]4[HexNAc]4[Fuc]1[NeuAc]1 |
| 5+ | 1316.5645               | 1316.5702              | 4                | AYDTEVHNVWATHACVPTDNPQEVVLENVTEHFNMWK | [Hex]4[HexNAc]5[Fuc]1[NeuAc]1 |
| 5+ | 1209.5310               | 1209.5299              | 1                | AYDTEVHNVWATHACVPTDNPQEVVLENVTEHFNMWK | [Hex]5[HexNAc]3[Fuc]1         |
| 5+ | 1177.1146               | 1177.1194              | 4                | AYDTEVHNVWATHACVPTDNPQEVVLENVTEHFNMWK | [Hex]4[HexNAc]3[Fuc]1         |
| 5+ | 1220.9263               | 1220.9342              | 6                | AYDTEVHNVWATHACVPTDNPQEVVLENVTEHFNMWK | [Hex]5[HexNAc]4               |
| 5+ | 1250.1493               | 1250.1458              | 3                | AYDTEVHNVWATHACVPTDNPQEVVLENVTEHFNMWK | [Hex]5[HexNAc]4[Fuc]1         |
| 5+ | 1308.3658               | 1308.3649              | 1                | AYDTEVHNVWATHACVPTDNPQEVVLENVTEHFNMWK | [Hex]5[HexNAc]4[Fuc]1[NeuAc]1 |
| 5+ | 1279.1562               | 1279.1533              | 2                | AYDTEVHNVWATHACVPTDNPQEVVLENVTEHFNMWK | [Hex]5[HexNAc]4[NeuAc]1       |
| 5+ | 1290.7531               | 1290.7617              | 7                | AYDTEVHNVWATHACVPTDNPQEVVLENVTEHFNMWK | [Hex]5[HexNAc]5[Fuc]1         |
| 5+ | 1348.9682               | 1348.9808              | 9                | AYDTEVHNVWATHACVPTDNPQEVVLENVTEHFNMWK | [Hex]5[HexNAc]5[Fuc]1[NeuAc]1 |
| 5+ | 1212.7181               | 1212.7289              | 9                | AYDTEVHNVWATHACVPTDNPQEVVLENVTEHFNMWK | [Hex]6[HexNAc]3               |
| 5+ | 1323.1727               | 1323.1722              | 0.4              | AYDTEVHNVWATHACVPTDNPQEVVLENVTEHFNMWK | [Hex]6[HexNAc]5[Fuc]1         |
| 5+ | 1381.3779               | 1381.3913              | 10               | AYDTEVHNVWATHACVPTDNPQEVVLENVTEHFNMWK | [Hex]6[HexNAc]5[Fuc]1[NeuAc]1 |
| 5+ | 1439.6125               | 1439.6104              | 1                | AYDTEVHNVWATHACVPTDNPQEVVLENVTEHFNMWK | [Hex]6[HexNAc]5[Fuc]1[NeuAc]2 |
| 5+ | 1497.8298               | 1497.8295              | 0.2              | AYDTEVHNVWATHACVPTDNPQEVVLENVTEHFNMWK | [Hex]6[HexNAc]5[Fuc]1[NeuAc]3 |
| 5+ | 1204.5258               | 1204.5236              | 2                | AYDTEVHNVWATHACVPTDNPQEVVLENVTEHFNMWK | [Hex]7[HexNAc]2               |
| 5+ | 1512.6395               | 1512.6368              | 2                | AYDTEVHNVWATHACVPTDNPQEVVLENVTEHFNMWK | [Hex]7[HexNAc]6[Fuc]1[NeuAc]2 |
| 5+ | 1570.8611               | 1570.8559              | 3                | AYDTEVHNVWATHACVPTDNPQEVVLENVTEHFNMWK | [Hex]7[HexNAc]6[Fuc]1[NeuAc]3 |
| 5+ | 1629.0790               | 1629.0750              | 2                | AYDTEVHNVWATHACVPTDNPQEVVLENVTEHFNMWK | [Hex]7[HexNAc]6[Fuc]1[NeuAc]4 |
| 5+ | 1236.9300               | 1236.9256              | 4                | AYDTEVHNVWATHACVPTDNPQEVVLENVTEHFNMWK | [Hex]8[HexNAc]2               |
| 5+ | 1269.3440               | 1269.3447              | 1                | AYDTEVHNVWATHACVPTDNPQEVVLENVTEHFNMWK | [Hex]9[HexNAc]2               |
| 5+ | 1301.7529               | 1301.7553              | 2                | AYDTEVHNVWATHACVPTDNPQEVVLENVTEHFNMWK | [Hex]10[HexNAc]2              |
| 6+ | 1138.9807               | 1138.9878              | 6                | AYDTEVHNVWATHACVPTDNPQEVVLENVTEHFNMWK | [Hex]5[HexNAc]4[Fuc]1[NeuAc]2 |
| 6+ | 1175.4980               | 1175.5002              | 2                | AYDTEVHNVWATHACVPTDNPQEVVLENVTEHFNMWK | [Hex]6[HexNAc]5[NeuAc]2       |
| 4+ | 1120.2640               | 1120.2705              | 6                | AYDTEVHNVWATHACVPTDNPQEVVLENVTEHFNMWK | non-glycosylated              |
| 3+ | 1213.8072               | 1213.8087              | 1                | DVNATNTTNDSEGTMER                     | [Hex]6[HexNAc]4               |
| 3+ | 1267.8207               | 1267.8263              | 4                | DVNATNTTNDSEGTMER                     | [Hex]7[HexNAc]4               |
| 3+ | 1321.8395               | 1321.8439              | 3                | DVNATNTTNDSEGTMER                     | [Hex]8[HexNAc]4               |
| 3+ | 1375.8593               | 1375.8615              | 2                | DVNATNTTNDSEGTMER                     | [Hex]9[HexNAc]4               |
| 3+ | 1429.8706               | 1429.8791              | 6                | DVNATNTTNDSEGTMER                     | [Hex]10[HexNAc]4              |
| 3+ | 1483.8882               | 1483.8967              | 6                | DVNATNTTNDSEGTMER                     | [Hex]11[HexNAc]4              |
| 3+ | 1537.9026               | 1537.9143              | 8                | DVNATNTTNDSEGTMER                     | [Hex]12[HexNAc]4              |
| 4+ | 1342.4899               | 1342.5115              | 16               | DVNATNTTNDSEGTMER                     | [Hex]12[HexNAc]7[Fuc]1        |
| 3+ | 1591.9273               | 1591.9319              | 3                | DVNATNTTNDSEGTMER                     | [Hex]13[HexNAc]4              |
| 4+ | 1383.0018               | 1383.0247              | 17               | DVNATNTTNDSEGTMER                     | [Hex]13[HexNAc]7[Fuc]1        |
| 3+ | 1645.9405               | 1645.9495              | 5                | DVNATNTTNDSEGTMER                     | [Hex]14[HexNAc]4              |
| 3+ | 1699.9557               | 1699.9671              | 7                | DVNATNTTNDSEGTMER                     | [Hex]15[HexNAc]4              |

| CS | Experimental<br><i>m/z</i> | Theoretical<br><i>m/z</i> | Mass<br>Error<br>(ppm) | Peptide Sequence  | Glycan                         |
|----|----------------------------|---------------------------|------------------------|-------------------|--------------------------------|
| 3+ | 1753.9730                  | 1753.9847                 | 7                      | DVNATNTTNDSEGTMER | [Hex]16[HexNAc]4               |
| 3+ | 1807.9951                  | 1808.0023                 | 4                      | DVNATNTTNDSEGTMER | [Hex]17[HexNAc]4               |
| 3+ | 1862.0026                  | 1862.0199                 | 9                      | DVNATNTTNDSEGTMER | [Hex]18[HexNAc]4               |
| 3+ | 1916.0420                  | 1916.0375                 | 2                      | DVNATNTTNDSEGTMER | [Hex]19[HexNAc]4               |
|    |                            |                           |                        |                   |                                |
| 2+ | 1029.4315                  | 1029.4291                 | 2                      | DVNATNTTNDSEGTMER | [HexNAc]                       |
| 2+ | 1130.9700                  | 1130.9716                 | 1                      | DVNATNTTNDSEGTMER | [HexNAc]2                      |
| 3+ | 862.3529                   | 862.3520                  | 1                      | DVNATNTTNDSEGTMER | [Hex]2[HexNAc]2                |
| 3+ | 916.3667                   | 916.3696                  | 3                      | DVNATNTTNDSEGTMER | [Hex]3[HexNAc]2                |
| 3+ | 1100.4500                  | 1100.4418                 | 7                      | DVNATNTTNDSEGTMER | [Hex]3[HexNAc]4[Fuc]1          |
| 3+ | 1168.1409                  | 1168.1350                 | 5                      | DVNATNTTNDSEGTMER | [Hex]3[HexNAc]5[Fuc]1          |
| 3+ | 970.3878                   | 970.3872                  | 1                      | DVNATNTTNDSEGTMER | [Hex]4[HexNAc]2                |
| 3+ | 1038.0904                  | 1038.0803                 | 10                     | DVNATNTTNDSEGTMER | [Hex]4[HexNAc]3                |
| 3+ | 1086.7711                  | 1086.7663                 | 4                      | DVNATNTTNDSEGTMER | [Hex]4[HexNAc]3[Fuc]1          |
| 3+ | 1024.4069                  | 1024.4048                 | 2                      | DVNATNTTNDSEGTMER | [Hex]5[HexNAc]2                |
| 3+ | 1092.1068                  | 1092.0979                 | 8                      | DVNATNTTNDSEGTMER | [Hex]5[HexNAc]3                |
| 3+ | 1402.5488                  | 1402.5406                 | 6                      | DVNATNTTNDSEGTMER | [Hex]5[HexNAc]4[Fuc]1[NeuAc]2  |
| 3+ | 1537.9190                  | 1537.9269                 | 5                      | DVNATNTTNDSEGTMER | [Hex]5[HexNAc]6[Fuc]1[NeuAc]2  |
| 3+ | 1078.4204                  | 1078.4224                 | 2                      | DVNATNTTNDSEGTMER | [Hex]6[HexNAc]2                |
| 3+ | 1262.4950                  | 1262.4946                 | 0.3                    | DVNATNTTNDSEGTMER | [Hex]6[HexNAc]4[Fuc]1          |
| 3+ | 1591.9593                  | 1591.9445                 | 9                      | DVNATNTTNDSEGTMER | [Hex]6[HexNAc]6[Fuc]1[NeuAc]2  |
| 2+ | 1698.1563                  | 1698.1564                 | 0.1                    | DVNATNTTNDSEGTMER | [Hex]7[HexNAc]2                |
| 3+ | 1200.1365                  | 1200.1331                 | 3                      | DVNATNTTNDSEGTMER | [Hex]7[HexNAc]3                |
| 3+ | 1578.2791                  | 1578.2690                 | 6                      | DVNATNTTNDSEGTMER | [Hex]7[HexNAc]5[Fuc]1[NeuAc]2  |
| 3+ | 1645.9510                  | 1645.9621                 | 7                      | DVNATNTTNDSEGTMER | [Hex]7[HexNAc]6[Fuc]1[NeuAc]2  |
| 3+ | 1713.6477                  | 1713.6552                 | 4                      | DVNATNTTNDSEGTMER | [Hex]7[HexNAc]7[Fuc]1[NeuAc]2  |
| 3+ | 1186.4566                  | 1186.4576                 | 1                      | DVNATNTTNDSEGTMER | [Hex]8[HexNAc]2                |
| 3+ | 1240.4793                  | 1240.4752                 | 3                      | DVNATNTTNDSEGTMER | [Hex]9[HexNAc]2                |
| 3+ | 1294.5045                  | 1294.4928                 | 9                      | DVNATNTTNDSEGTMER | [Hex]10[HexNAc]2               |
|    |                            |                           |                        |                   |                                |
| 2+ | 927.8925                   | 927.8921                  | 0.4                    | DVNATNTTNDSEGTMER | non-glycosylated               |
|    |                            |                           |                        |                   |                                |
| 3+ | 979.0744                   | 979.0758                  | 1                      | NCSFNITTSIR       | [Hex]5[HexNAc]4                |
| 3+ | 1033.0914                  | 1033.0934                 | 2                      | NCSFNITTSIR       | [Hex]6[HexNAc]4                |
| 3+ | 1087.1084                  | 1087.1110                 | 2                      | NCSFNITTSIR       | [Hex]7[HexNAc]4                |
| 3+ | 1141.1288                  | 1141.1286                 | 0.2                    | NCSFNITTSIR       | [Hex]8[HexNAc]4                |
| 3+ | 1195.1415                  | 1195.1463                 | 4                      | NCSFNITTSIR       | [Hex]9[HexNAc]4                |
| 3+ | 1249.1632                  | 1249.1639                 | 1                      | NCSFNITTSIR       | [Hex]10[HexNAc]4               |
| 3+ | 1433.2414                  | 1433.2361                 | 4                      | NCSFNITTSIR       | [Hex]10[HexNAc]6[Fuc]1         |
| 3+ | 1568.6167                  | 1568.6223                 | 4                      | NCSFNITTSIR       | [Hex]10[HexNAc]8[Fuc]1         |
| 3+ | 1303.1816                  | 1303.1815                 | 0.1                    | NCSFNITTSIR       | [Hex]11[HexNAc]4               |
| 3+ | 1487.2554                  | 1487.2537                 | 1                      | NCSFNITTSIR       | [Hex]11[HexNAc]6[Fuc]1         |
| 4+ | 1261.2344                  | 1261.2304                 | 3                      | NCSFNITTSIR       | [Hex]11[HexNAc]6[Fuc]1[NeuAc]2 |
| 3+ | 1357.2001                  | 1357.1991                 | 1                      | NCSFNITTSIR       | [Hex]12[HexNAc]4               |
| 4+ | 1156.2102                  | 1156.2053                 | 4                      | NCSFNITTSIR       | [Hex]12[HexNAc]6[Fuc]1         |
| 3+ | 1411.2162                  | 1411.2167                 | 0.4                    | NCSFNITTSIR       | [Hex]13[HexNAc]4               |
| 3+ | 1478.8878                  | 1478.9098                 | 15                     | NCSFNITTSIR       | [Hex]13[HexNAc]5               |
| 3+ | 1465.2341                  | 1465.2343                 | 0.1                    | NCSFNITTSIR       | [Hex]14[HexNAc]4               |
| 3+ | 1519.2478                  | 1519.2519                 | 3                      | NCSFNITTSIR       | [Hex]15[HexNAc]4               |
| 3+ | 1573.2663                  | 1573.2695                 | 2                      | NCSFNITTSIR       | [Hex]16[HexNAc]4               |
| 3+ | 1627.2844                  | 1627.2871                 | 2                      | NCSFNITTSIR       | [Hex]17[HexNAc]4               |
| 3+ | 1681.3050                  | 1681.3047                 | 0.2                    | NCSFNITTSIR       | [Hex]18[HexNAc]4               |
| 3+ | 1735.3255                  | 1735.3223                 | 2                      | NCSFNITTSIR       | [Hex]19[HexNAc]4               |
| 3+ | 1789.3459                  | 1789.3399                 | 3                      | NCSFNITTSIR       | [Hex]20[HexNAc]4               |
|    |                            |                           |                        |                   |                                |
| 2+ | 758.3593                   | 758.3563                  | 4                      | NCSFNITTSIR       | [HexNAc]                       |

| CS | Experimental<br><i>m/z</i> | Theoretical<br><i>m/z</i> | Mass<br>Error<br>(ppm) | Peptide Sequence | Glycan                        |
|----|----------------------------|---------------------------|------------------------|------------------|-------------------------------|
| 2+ | 859.8991                   | 859.8987                  | 0.5                    | NCSFNITTSIR      | [HexNAc]2                     |
| 2+ | 940.9270                   | 940.9251                  | 2                      | NCSFNITTSIR      | [Hex]1[HexNAc]2               |
| 2+ | 1102.9785                  | 1102.9779                 | 1                      | NCSFNITTSIR      | [Hex]3[HexNAc]2               |
| 2+ | 1204.5195                  | 1204.5176                 | 2                      | NCSFNITTSIR      | [Hex]3[HexNAc]3               |
| 2+ | 1306.0560                  | 1306.0573                 | 1                      | NCSFNITTSIR      | [Hex]3[HexNAc]4               |
| 2+ | 1582.1711                  | 1582.1657                 | 3                      | NCSFNITTSIR      | [Hex]3[HexNAc]6[Fuc]1         |
| 2+ | 1184.0061                  | 1184.0044                 | 1                      | NCSFNITTSIR      | [Hex]4[HexNAc]2               |
| 2+ | 1285.5482                  | 1285.5440                 | 3                      | NCSFNITTSIR      | [Hex]4[HexNAc]3               |
| 2+ | 1265.0342                  | 1265.0307                 | 3                      | NCSFNITTSIR      | [Hex]5[HexNAc]2               |
| 2+ | 1366.5807                  | 1366.5704                 | 8                      | NCSFNITTSIR      | [Hex]5[HexNAc]3               |
| 2+ | 1346.0592                  | 1346.0572                 | 1                      | NCSFNITTSIR      | [Hex]6[HexNAc]2               |
| 2+ | 1447.6145                  | 1447.5968                 | 12                     | NCSFNITTSIR      | [Hex]6[HexNAc]3               |
| 2+ | 1427.0853                  | 1427.0836                 | 1                      | NCSFNITTSIR      | [Hex]7[HexNAc]2               |
| 2+ | 1508.1167                  | 1508.1100                 | 4                      | NCSFNITTSIR      | [Hex]8[HexNAc]2               |
| 2+ | 1589.1468                  | 1589.1364                 | 7                      | NCSFNITTSIR      | [Hex]9[HexNAc]2               |
|    |                            |                           |                        |                  |                               |
| 3+ | 919.7291                   | 919.7266                  | 3                      | NCSFNITTSIR      | [Hex]3[HexNAc]4[Fuc]1         |
| 3+ | 1124.8009                  | 1124.7936                 | 6                      | NCSFNITTSIR      | [Hex]5[HexNAc]4[Fuc]1[NeuAc]1 |
| 3+ | 1221.8307                  | 1221.8254                 | 4                      | NCSFNITTSIR      | [Hex]5[HexNAc]4[Fuc]1[NeuAc]2 |
| 3+ | 1314.1754                  | 1314.1975                 | 17                     | NCSFNITTSIR      | [Hex]6[HexNAc]6[Fuc]1[NeuAc]1 |
| 3+ | 1265.5234                  | 1265.5115                 | 9                      | NCSFNITTSIR      | [Hex]6[HexNAc]6[NeuAc]1       |
| 3+ | 1319.5461                  | 1319.5291                 | 13                     | NCSFNITTSIR      | [Hex]7[HexNAc]6[NeuAc]1       |
| 3+ | 1113.7812                  | 1113.7776                 | 3                      | NCSFNITTSIR      | [Hex]10[HexNAc]2              |
|    |                            |                           |                        |                  |                               |
| 2+ | 1480.6319                  | 1480.6260                 | 4                      | NCSFNITTSIR*     | [Hex]3[HexNAc]5[Fuc]1         |
| 2+ | 1460.1149                  | 1460.1127                 | 2                      | NCSFNITTSIR*     | [Hex]4[HexNAc]4 [Fuc]1        |
| 2+ | 1707.2061                  | 1707.2001                 | 4                      | NCSFNITTSIR*     | [Hex]4[HexNAc]5[Fuc]1[NeuAc]1 |
| 2+ | 1686.6860                  | 1686.6868                 | 0.5                    | NCSFNITTSIR*     | [Hex]5[HexNAc]4[Fuc]1[NeuAc]1 |
| 2+ | 1642.6826                  | 1642.6788                 | 2                      | NCSFNITTSIR*     | [Hex]5[HexNAc]5[Fuc]1         |
| 2+ | 1788.2326                  | 1788.2265                 | 3                      | NCSFNITTSIR*     | [Hex]5[HexNAc]5[Fuc]1[NeuAc]1 |
| 2+ | 1933.7757                  | 1933.7742                 | 1                      | NCSFNITTSIR*     | [Hex]5[HexNAc]5[Fuc]1[NeuAc]2 |
| 2+ | 1889.7572                  | 1889.7661                 | 5                      | NCSFNITTSIR*     | [Hex]5[HexNAc]6[Fuc]1[NeuAc]1 |
|    |                            |                           |                        |                  |                               |
| 3+ | 1055.1202                  | 1055.1128                 | 7                      | NCSFNITTSIR*     | [Hex]3[HexNAc]6[Fuc]1         |
| 3+ | 1041.4428                  | 1041.4373                 | 5                      | NCSFNITTSIR*     | [Hex]4[HexNAc]5[Fuc]1         |
| 3+ | 1235.5121                  | 1235.5009                 | 9                      | NCSFNITTSIR*     | [Hex]4[HexNAc]5[Fuc]1[NeuAc]2 |
| 3+ | 1109.1405                  | 1109.1304                 | 9                      | NCSFNITTSIR*     | [Hex]4[HexNAc]6[Fuc]1         |
| 3+ | 1221.8363                  | 1221.8254                 | 9                      | NCSFNITTSIR*     | [Hex]5[HexNAc]4[Fuc]1[NeuAc]2 |
| 3+ | 1192.4750                  | 1192.4867                 | 10                     | NCSFNITTSIR*     | [Hex]5[HexNAc]5[Fuc]1[NeuAc]1 |
| 3+ | 1357.2181                  | 1357.2117                 | 5                      | NCSFNITTSIR*     | [Hex]5[HexNAc]6[Fuc]1[NeuAc]2 |
| 3+ | 1246.5027                  | 1246.5043                 | 1                      | NCSFNITTSIR*     | [Hex]6[HexNAc]5[Fuc]1[NeuAc]1 |
| 3+ | 1343.5383                  | 1343.5361                 | 2                      | NCSFNITTSIR*     | [Hex]6[HexNAc]5[Fuc]1[NeuAc]2 |
| 3+ | 1314.2004                  | 1314.1975                 | 2                      | NCSFNITTSIR*     | [Hex]6[HexNAc]6[Fuc]1[NeuAc]1 |
| 3+ | 1411.2315                  | 1411.2293                 | 2                      | NCSFNITTSIR*     | [Hex]6[HexNAc]6[Fuc]1[NeuAc]2 |
| 3+ | 1508.2646                  | 1508.2611                 | 2                      | NCSFNITTSIR*     | [Hex]6[HexNAc]6[Fuc]1[NeuAc]3 |
| 3+ | 1265.5170                  | 1265.5115                 | 4                      | NCSFNITTSIR*     | [Hex]6[HexNAc]6[NeuAc]1       |
| 3+ | 1300.5319                  | 1300.5219                 | 8                      | NCSFNITTSIR*     | [Hex]7[HexNAc]5[Fuc]1[NeuAc]1 |
| 3+ | 1532.9453                  | 1532.9400                 | 3                      | NCSFNITTSIR*     | [Hex]7[HexNAc]7[Fuc]1[NeuAc]2 |
|    |                            |                           |                        |                  |                               |
| 2+ | 656.8222                   | 656.8193                  | 4                      | NCSFNITTSIR      | non-glycosylated              |
|    |                            |                           |                        |                  |                               |
| 2+ | 911.9446                   | 911.9418                  | 3                      | LDVVPIDNNNTSYR   | [HexNAc]                      |
| 2+ | 1013.4842                  | 1013.4842                 | 0                      | LDVVPIDNNNTSYR   | [HexNAc]2                     |
| 2+ | 1094.5114                  | 1094.5106                 | 1                      | LDVVPIDNNNTSYR   | [Hex]1[HexNAc]2               |
| 2+ | 1175.5384                  | 1175.5370                 | 1                      | LDVVPIDNNNTSYR   | [Hex]2[HexNAc]2               |
| 2+ | 1337.5895                  | 1337.5899                 | 0.3                    | LDVVPIDNNNTSYR   | [Hex]4[HexNAc]2               |

| CS | Experimental<br><i>m/z</i> | Theoretical<br><i>m/z</i> | Mass<br>Error<br>(ppm) | Peptide Sequence | Glycan                           |
|----|----------------------------|---------------------------|------------------------|------------------|----------------------------------|
| 2+ | 1580.6742                  | 1580.6691                 | 3                      | LDVVPIDNNNTSYR   | [Hex]7[HexNAc]2                  |
| 2+ | 1661.6881                  | 1661.6955                 | 4                      | LDVVPIDNNNTSYR   | [Hex]8[HexNAc]2                  |
| 2+ | 1742.7225                  | 1742.7219                 | 0.3                    | LDVVPIDNNNTSYR   | [Hex]9[HexNAc]2                  |
|    |                            |                           |                        |                  |                                  |
| 3+ | 838.0448                   | 838.0447                  | 0.1                    | LDVVPIDNNNTSYR   | [Hex]3[HexNAc]2                  |
| 3+ | 1022.1218                  | 1022.1169                 | 5                      | LDVVPIDNNNTSYR   | [Hex]3[HexNAc]4[Fuc]1            |
| 3+ | 1089.8149                  | 1089.8101                 | 4                      | LDVVPIDNNNTSYR   | [Hex]3[HexNAc]5[Fuc]1            |
| 3+ | 1157.5067                  | 1157.5032                 | 3                      | LDVVPIDNNNTSYR   | [Hex]3[HexNAc]6[Fuc]1            |
| 3+ | 1076.1389                  | 1076.1345                 | 4                      | LDVVPIDNNNTSYR   | [Hex]4[HexNAc]4 [Fuc]1           |
| 3+ | 1173.1706                  | 1173.1663                 | 4                      | LDVVPIDNNNTSYR   | [Hex]4[HexNAc]4[Fuc]1[NeuAc]1    |
| 3+ | 1240.8626                  | 1240.8595                 | 2                      | LDVVPIDNNNTSYR   | [Hex]4[HexNAc]5[Fuc]1[NeuAc]1    |
| 3+ | 1211.5215                  | 1211.5208                 | 1                      | LDVVPIDNNNTSYR   | [Hex]4[HexNAc]6[Fuc]1            |
| 3+ | 946.0815                   | 946.0799                  | 2                      | LDVVPIDNNNTSYR   | [Hex]5[HexNAc]2                  |
| 3+ | 1130.1568                  | 1130.1521                 | 4                      | LDVVPIDNNNTSYR   | [Hex]5[HexNAc]4[Fuc]1            |
| 3+ | 1227.1890                  | 1227.1839                 | 4                      | LDVVPIDNNNTSYR   | [Hex]5[HexNAc]4[Fuc]1[NeuAc]1    |
| 3+ | 1324.2195                  | 1324.2157                 | 3                      | LDVVPIDNNNTSYR   | [Hex]5[HexNAc]4[Fuc]1[NeuAc]2    |
| 3+ | 1197.8561                  | 1197.8453                 | 9                      | LDVVPIDNNNTSYR   | [Hex]5[HexNAc]5[Fuc]1            |
| 3+ | 1294.8838                  | 1294.8771                 | 5                      | LDVVPIDNNNTSYR   | [Hex]5[HexNAc]5[Fuc]1[NeuAc]1    |
| 3+ | 1391.9128                  | 1391.9089                 | 3                      | LDVVPIDNNNTSYR   | [Hex]5[HexNAc]5[Fuc]1[NeuAc]2    |
| 3+ | 1265.5314                  | 1265.5384                 | 6                      | LDVVPIDNNNTSYR   | [Hex]5[HexNAc]6[Fuc]1            |
| 3+ | 1362.5701                  | 1362.5702                 | 0.1                    | LDVVPIDNNNTSYR   | [Hex]5[HexNAc]6[Fuc]1[NeuAc]1    |
| 3+ | 1459.6017                  | 1459.6020                 | 0.2                    | LDVVPIDNNNTSYR   | [Hex]5[HexNAc]6[Fuc]1[NeuAc]2    |
| 3+ | 1000.0989                  | 1000.0975                 | 1                      | LDVVPIDNNNTSYR   | [Hex]6[HexNAc]2                  |
| 3+ | 1251.8673                  | 1251.8629                 | 4                      | LDVVPIDNNNTSYR   | [Hex]6[HexNAc]5[Fuc]1            |
| 3+ | 1348.8961                  | 1348.8947                 | 1                      | LDVVPIDNNNTSYR   | [Hex]6[HexNAc]5[Fuc]1[NeuAc]1    |
| 3+ | 1445.9253                  | 1445.9265                 | 1                      | LDVVPIDNNNTSYR   | [Hex]6[HexNAc]5[Fuc]1[NeuAc]2    |
| 3+ | 1542.9593                  | 1542.9583                 | 1                      | LDVVPIDNNNTSYR   | [Hex]6[HexNAc]5[Fuc]1[NeuAc]3    |
| 3+ | 1513.6135                  | 1513.6196                 | 4                      | LDVVPIDNNNTSYR   | [Hex]6[HexNAc]6[Fuc]1[NeuAc]2    |
| 3+ | 1610.6511                  | 1610.6514                 | 0.2                    | LDVVPIDNNNTSYR   | [Hex]6[HexNAc]6[Fuc]1[NeuAc]3    |
| 3+ | 1373.5770                  | 1373.5736                 | 2                      | LDVVPIDNNNTSYR   | [Hex]7[HexNAc]6[Fuc]1            |
| 3+ | 1470.6087                  | 1470.6054                 | 2                      | LDVVPIDNNNTSYR   | [Hex]7[HexNAc]6[Fuc]1[NeuAc]1    |
| 3+ | 1567.6413                  | 1567.6372                 | 3                      | LDVVPIDNNNTSYR   | [Hex]7[HexNAc]6[Fuc]1[NeuAc]2    |
| 3+ | 1664.6742                  | 1664.6690                 | 3                      | LDVVPIDNNNTSYR   | [Hex]7[HexNAc]6[Fuc]1[NeuAc]3    |
| 3+ | 1495.2987                  | 1495.2843                 | 10                     | LDVVPIDNNNTSYR   | [Hex]8 [HexNAc]7 [Fuc]1          |
| 3+ | 1689.3529                  | 1689.3479                 | 3                      | LDVVPIDNNNTSYR   | [Hex]8 [HexNAc]7 [Fuc]1 [NeuAc]2 |
| 3+ | 1054.1167                  | 1054.1151                 | 2                      | LDVVPIDNNNTSYR   | [Hex]8[HexNAc]2                  |
| 3+ | 1592.3257                  | 1592.3161                 | 6                      | LDVVPIDNNNTSYR   | [Hex]8[HexNAc]7[Fuc]1[NeuAc]1    |
| 3+ | 1786.3802                  | 1786.3797                 | 0.3                    | LDVVPIDNNNTSYR   | [Hex]8[HexNAc]7[Fuc]1[NeuAc]3    |
| 3+ | 1883.4131                  | 1883.4115                 | 1                      | LDVVPIDNNNTSYR   | [Hex]8[HexNAc]7[Fuc]1[NeuAc]4    |
| 3+ | 1908.0723                  | 1908.0905                 | 10                     | LDVVPIDNNNTSYR   | [Hex]9[HexNAc]8[Fuc]1[NeuAc]3    |
| 3+ | 1216.1693                  | 1216.1679                 | 1                      | LDVVPIDNNNTSYR   | [Hex]10[HexNAc]2                 |
|    |                            |                           |                        |                  |                                  |
| 4+ | 1212.9954                  | 1212.9981                 | 2                      | LDVVPIDNNNTSYR   | [Hex]9[HexNAc]8[Fuc]1            |
|    |                            |                           |                        |                  |                                  |
| 2+ | 810.4040                   | 810.4048                  | 1.0                    | LDVVPIDNNNTSYR   | non-glycosylated                 |
|    |                            |                           |                        |                  |                                  |
| 1+ | 1213.5393                  | 1213.5331                 | 5                      | SDNFTNNAK        | [HexNAc]1                        |
|    |                            |                           |                        |                  |                                  |
| 2+ | 870.8628                   | 870.8627                  | 0.1                    | SDNFTNNAK        | [Hex]2[HexNAc]2                  |
| 2+ | 951.8921                   | 951.8891                  | 3                      | SDNFTNNAK        | [Hex]3[HexNAc]2                  |
| 2+ | 1053.4337                  | 1053.4288                 | 5                      | SDNFTNNAK        | [Hex]3[HexNAc]3                  |
| 2+ | 1126.4573                  | 1126.4578                 | 0.4                    | SDNFTNNAK        | [Hex]3[HexNAc]3[Fuc]1            |
| 2+ | 1228.0032                  | 1227.9974                 | 5                      | SDNFTNNAK        | [Hex]3[HexNAc]4[Fuc]1            |
| 2+ | 1329.5383                  | 1329.5372                 | 1                      | SDNFTNNAK        | [Hex]3[HexNAc]5[Fuc]1            |
| 2+ | 1431.0671                  | 1431.0769                 | 7                      | SDNFTNNAK        | [Hex]3[HexNAc]6[Fuc]1            |
| 2+ | 1032.9164                  | 1032.9156                 | 1                      | SDNFTNNAK        | [Hex]4[HexNAc]2                  |



| CS | Experimental<br><i>m/z</i> | Theoretical<br><i>m/z</i> | Mass<br>Error<br>(ppm) | Peptide Sequence | Glycan                        |
|----|----------------------------|---------------------------|------------------------|------------------|-------------------------------|
| 2+ | 1134.4550                  | 1134.4552                 | 0.2                    | SDNFTNNAK        | [Hex]4[HexNAc]3               |
| 2+ | 1207.4813                  | 1207.4842                 | 2                      | SDNFTNNAK        | [Hex]4[HexNAc]3[Fuc]1         |
| 2+ | 1235.9957                  | 1235.9949                 | 1                      | SDNFTNNAK        | [Hex]4[HexNAc]4               |
| 2+ | 1309.0219                  | 1309.0239                 | 2                      | SDNFTNNAK        | [Hex]4[HexNAc]4 [Fuc]1        |
| 2+ | 1462.5651                  | 1462.5690                 | 3                      | SDNFTNNAK        | [Hex]5 [HexNAc]4 [NeuAc]1     |
| 2+ | 1113.9458                  | 1113.9419                 | 4                      | SDNFTNNAK        | [Hex]5[HexNAc]2               |
| 2+ | 1215.4801                  | 1215.4816                 | 1                      | SDNFTNNAK        | [Hex]5[HexNAc]3               |
| 2+ | 1361.0186                  | 1361.0293                 | 8                      | SDNFTNNAK        | [Hex]5[HexNAc]3 [NeuAc]1      |
| 2+ | 1317.0243                  | 1317.0213                 | 2                      | SDNFTNNAK        | [Hex]5[HexNAc]4               |
| 2+ | 1390.0558                  | 1390.0503                 | 4                      | SDNFTNNAK        | [Hex]5[HexNAc]4[Fuc]1         |
| 2+ | 1535.6052                  | 1535.5980                 | 5                      | SDNFTNNAK        | [Hex]5[HexNAc]4[Fuc]1[NeuAc]1 |
| 2+ | 1681.1447                  | 1681.1457                 | 1                      | SDNFTNNAK        | [Hex]5[HexNAc]4[Fuc]1[NeuAc]2 |
| 2+ | 1194.9709                  | 1194.9684                 | 2                      | SDNFTNNAK        | [Hex]6[HexNAc]2               |
| 2+ | 1515.0735                  | 1515.0847                 | 7                      | SDNFTNNAK        | [Hex]6[HexNAc]3[Fuc]1[NeuAc]1 |
| 2+ | 1718.1696                  | 1718.1641                 | 3                      | SDNFTNNAK        | [Hex]6[HexNAc]5[Fuc]1[NeuAc]1 |
| 2+ | 1275.9979                  | 1275.9948                 | 2                      | SDNFTNNAK        | [Hex]7[HexNAc]2               |
| 2+ | 1377.5373                  | 1377.5344                 | 2                      | SDNFTNNAK        | [Hex]7[HexNAc]3               |
| 2+ | 1357.0205                  | 1357.0212                 | 1                      | SDNFTNNAK        | [Hex]8[HexNAc]2               |
| 2+ | 1438.0490                  | 1438.0476                 | 1                      | SDNFTNNAK        | [Hex]9[HexNAc]2               |
| 2+ | 1519.0784                  | 1519.0740                 | 3                      | SDNFTNNAK        | [Hex]10[HexNAc]2              |
|    |                            |                           |                        |                  |                               |
| 3+ | 770.3119                   | 770.3147                  | 4                      | SDNFTNNAK        | [Hex]3[HexNAc]4               |
| 3+ | 946.0352                   | 946.0431                  | 8                      | SDNFTNNAK        | [Hex]5[HexNAc]5               |
| 3+ | 959.0337                   | 959.0341                  | 0.4                    | SDNFTNNAK        | [Hex]5[HexNAc]5[Fuc]1         |
| 3+ | 1091.7582                  | 1091.7609                 | 2                      | SDNFTNNAK        | [Hex]5[HexNAc]5[Fuc]1[NeuAc]1 |
| 3+ | 1000.0613                  | 1000.0607                 | 1                      | SDNFTNNAK        | [Hex]6[HexNAc]5               |
| 3+ | 1048.7487                  | 1048.7467                 | 2                      | SDNFTNNAK        | [Hex]6[HexNAc]5[Fuc]1         |
| 3+ | 1242.8060                  | 1242.8103                 | 3                      | SDNFTNNAK        | [Hex]6[HexNAc]5[Fuc]1[NeuAc]2 |
| 3+ | 1097.0921                  | 1097.0925                 | 0.4                    | SDNFTNNAK        | [Hex]6[HexNAc]5[NeuAc]1       |
| 3+ | 1116.4432                  | 1116.4398                 | 3                      | SDNFTNNAK        | [Hex]6[HexNAc]6[Fuc]1         |
| 3+ | 1310.5020                  | 1310.5034                 | 1                      | SDNFTNNAK        | [Hex]6[HexNAc]6[Fuc]1[NeuAc]2 |
| 3+ | 1170.4580                  | 1170.4574                 | 1                      | SDNFTNNAK        | [Hex]7[HexNAc]6[Fuc]1         |
| 3+ | 1267.4868                  | 1267.4892                 | 2                      | SDNFTNNAK        | [Hex]7[HexNAc]6[Fuc]1[NeuAc]1 |
| 3+ | 1364.5220                  | 1364.5210                 | 1                      | SDNFTNNAK        | [Hex]7[HexNAc]6[Fuc]1[NeuAc]2 |
| 3+ | 1218.8027                  | 1218.8032                 | 0.4                    | SDNFTNNAK        | [Hex]7[HexNAc]6[NeuAc]1       |
|    |                            |                           |                        |                  |                               |
| 2+ | 505.7293                   | 505.7305                  | 2                      | SDNFTNNAK        | non-glycosylated              |
|    |                            |                           |                        |                  |                               |
| 3+ | 525.5938                   | 525.5894                  | 8                      | NVSTVQCTHGIR     | [HexNAc]                      |
| 3+ | 755.3416                   | 755.3372                  | 6                      | NVSTVQCTHGIR     | [Hex]3[HexNAc]2               |
| 3+ | 871.7208                   | 871.7163                  | 5                      | NVSTVQCTHGIR     | [Hex]3[HexNAc]3[Fuc]1         |
| 3+ | 890.7307                   | 890.7234                  | 8                      | NVSTVQCTHGIR     | [Hex]3[HexNAc]4               |
| 3+ | 939.4142                   | 939.4094                  | 5                      | NVSTVQCTHGIR     | [Hex]3[HexNAc]4[Fuc]1         |
| 3+ | 1007.1070                  | 1007.1025                 | 4                      | NVSTVQCTHGIR     | [Hex]3[HexNAc]5[Fuc]1         |
| 3+ | 809.3584                   | 809.3548                  | 4                      | NVSTVQCTHGIR     | [Hex]4[HexNAc]2               |
| 3+ | 877.0526                   | 877.0479                  | 5                      | NVSTVQCTHGIR     | [Hex]4[HexNAc]3               |
| 3+ | 944.7429                   | 944.7410                  | 2                      | NVSTVQCTHGIR     | [Hex]4[HexNAc]4               |
| 3+ | 993.4279                   | 993.4270                  | 1                      | NVSTVQCTHGIR     | [Hex]4[HexNAc]4 [Fuc]1        |
| 3+ | 863.3770                   | 863.3724                  | 5                      | NVSTVQCTHGIR     | [Hex]5[HexNAc]2               |
| 3+ | 931.0697                   | 931.0655                  | 5                      | NVSTVQCTHGIR     | [Hex]5[HexNAc]3               |
| 3+ | 998.7627                   | 998.7586                  | 4                      | NVSTVQCTHGIR     | [Hex]5[HexNAc]4               |
| 3+ | 1047.4413                  | 1047.4446                 | 3                      | NVSTVQCTHGIR     | [Hex]5[HexNAc]4[Fuc]1         |
| 3+ | 1144.4810                  | 1144.4764                 | 4                      | NVSTVQCTHGIR     | [Hex]5[HexNAc]4[Fuc]1[NeuAc]1 |
| 3+ | 1241.5125                  | 1241.5082                 | 3                      | NVSTVQCTHGIR     | [Hex]5[HexNAc]4[Fuc]1[NeuAc]2 |
| 3+ | 917.3951                   | 917.3900                  | 6                      | NVSTVQCTHGIR     | [Hex]6[HexNAc]2               |
| 3+ | 985.0885                   | 985.0831                  | 5                      | NVSTVQCTHGIR     | [Hex]6[HexNAc]3               |

| CS | Experimental<br><i>m/z</i> | Theoretical<br><i>m/z</i> | Mass<br>Error<br>(ppm) | Peptide Sequence                | Glycan                         |
|----|----------------------------|---------------------------|------------------------|---------------------------------|--------------------------------|
| 3+ | 971.4146                   | 971.4076                  | 7                      | NVSTVQCTHGIR                    | [Hex]7[HexNAc]2                |
| 3+ | 1039.0983                  | 1039.1007                 | 2                      | NVSTVQCTHGIR                    | [Hex]7[HexNAc]3                |
| 3+ | 1025.4311                  | 1025.4252                 | 6                      | NVSTVQCTHGIR                    | [Hex]8[HexNAc]2                |
| 3+ | 1079.4467                  | 1079.4428                 | 4                      | NVSTVQCTHGIR                    | [Hex]9[HexNAc]2                |
| 3+ | 1133.4664                  | 1133.4604                 | 5                      | NVSTVQCTHGIR                    | [Hex]10[HexNAc]2               |
|    |                            |                           |                        |                                 |                                |
| 2+ | 686.3417                   | 686.3435                  | 3                      | NVSTVQCTHGIR                    | non-glycosylated               |
|    |                            |                           |                        |                                 |                                |
| 5+ | 1178.7230                  | 1178.7498                 | 23                     | NVSTVQCTHGIRPVVSTQLLNGSLAEEVVIR | [Hex]9[HexNAc]4                |
| 5+ | 1211.1782                  | 1211.1604                 | 15                     | NVSTVQCTHGIRPVVSTQLLNGSLAEEVVIR | [Hex]10[HexNAc]4               |
| 5+ | 1308.3807                  | 1308.3921                 | 9                      | NVSTVQCTHGIRPVVSTQLLNGSLAEEVVIR | [Hex]13[HexNAc]4               |
| 5+ | 1340.7932                  | 1340.8026                 | 7                      | NVSTVQCTHGIRPVVSTQLLNGSLAEEVVIR | [Hex]14[HexNAc]4               |
| 5+ | 1373.2142                  | 1373.2132                 | 1                      | NVSTVQCTHGIRPVVSTQLLNGSLAEEVVIR | [Hex]15[HexNAc]4               |
| 5+ | 1405.6299                  | 1405.6238                 | 4                      | NVSTVQCTHGIRPVVSTQLLNGSLAEEVVIR | [Hex]16[HexNAc]4               |
| 5+ | 1438.0413                  | 1438.0343                 | 5                      | NVSTVQCTHGIRPVVSTQLLNGSLAEEVVIR | [Hex]17[HexNAc]4               |
| 5+ | 1470.4501                  | 1470.4449                 | 4                      | NVSTVQCTHGIRPVVSTQLLNGSLAEEVVIR | [Hex]18[HexNAc]4               |
|    |                            |                           |                        |                                 |                                |
| 3+ | 932.5257                   | 932.5201                  | 6                      | GIRPVVSTQLLNGSLAEEVVIR          | [HexNAc]                       |
| 3+ | 1432.3590                  | 1432.3559                 | 2                      | GIRPVVSTQLLNGSLAEEVVIR          | [Hex]8[HexNAc]2                |
| 3+ | 1486.3764                  | 1486.3735                 | 2                      | GIRPVVSTQLLNGSLAEEVVIR          | [Hex]9[HexNAc]2                |
| 3+ | 1540.3942                  | 1540.3911                 | 2                      | GIRPVVSTQLLNGSLAEEVVIR          | [Hex]10[HexNAc]2               |
|    |                            |                           |                        |                                 |                                |
| 3+ | 864.8352                   | 864.8288                  | 7                      | GIRPVVSTQLLNGSLAEEVVIR          | non-glycosylated               |
|    |                            |                           |                        |                                 |                                |
| 3+ | 737.3398                   | 737.3379                  | 3                      | ESVEINSTRPNNNTR                 | [HexNAc]2                      |
| 3+ | 1250.8393                  | 1250.8473                 | 6                      | ESVEINSTRPNNNTR                 | [Hex]7[HexNAc]4                |
| 3+ | 1304.8596                  | 1304.8649                 | 4                      | ESVEINSTRPNNNTR                 | [Hex]8[HexNAc]4                |
| 3+ | 1358.8817                  | 1358.8826                 | 1                      | ESVEINSTRPNNNTR                 | [Hex]9[HexNAc]4                |
| 3+ | 1475.2618                  | 1475.2616                 | 0.1                    | ESVEINSTRPNNNTR                 | [Hex]9[HexNAc]5[Fuc]1          |
| 3+ | 1412.9000                  | 1412.9002                 | 0.1                    | ESVEINSTRPNNNTR                 | [Hex]10[HexNAc]4               |
| 3+ | 1858.7184                  | 1858.7291                 | 6                      | ESVEINSTRPNNNTR                 | [Hex]10[HexNAc]7[Fuc]1[NeuAc]2 |
| 3+ | 1466.9137                  | 1466.9178                 | 3                      | ESVEINSTRPNNNTR                 | [Hex]11[HexNAc]4               |
| 3+ | 1650.9954                  | 1650.9900                 | 3                      | ESVEINSTRPNNNTR                 | [Hex]11[HexNAc]6[Fuc]1         |
| 3+ | 1520.9341                  | 1520.9354                 | 1                      | ESVEINSTRPNNNTR                 | [Hex]12[HexNAc]4               |
| 3+ | 1637.3163                  | 1637.3145                 | 1                      | ESVEINSTRPNNNTR                 | [Hex]12[HexNAc]5[Fuc]1         |
| 3+ | 1705.0109                  | 1705.0076                 | 2                      | ESVEINSTRPNNNTR                 | [Hex]12[HexNAc]6[Fuc]1         |
| 3+ | 1574.9538                  | 1574.9530                 | 1                      | ESVEINSTRPNNNTR                 | [Hex]13[HexNAc]4               |
| 3+ | 1759.0303                  | 1759.0252                 | 3                      | ESVEINSTRPNNNTR                 | [Hex]13[HexNAc]6[Fuc]1         |
| 3+ | 1923.7432                  | 1923.7501                 | 4                      | ESVEINSTRPNNNTR                 | [Hex]13[HexNAc]7[Fuc]1[NeuAc]1 |
| 3+ | 1628.9680                  | 1628.9706                 | 2                      | ESVEINSTRPNNNTR                 | [Hex]14[HexNAc]4               |
| 3+ | 1682.9877                  | 1682.9882                 | 0.3                    | ESVEINSTRPNNNTR                 | [Hex]15[HexNAc]4               |
| 3+ | 1737.0078                  | 1737.0058                 | 1                      | ESVEINSTRPNNNTR                 | [Hex]16[HexNAc]4               |
| 3+ | 1791.0252                  | 1791.0234                 | 1                      | ESVEINSTRPNNNTR                 | [Hex]17[HexNAc]4               |
| 3+ | 1845.0423                  | 1845.0410                 | 1                      | ESVEINSTRPNNNTR                 | [Hex]18[HexNAc]4               |
| 3+ | 1899.0613                  | 1899.0586                 | 1                      | ESVEINSTRPNNNTR                 | [Hex]19[HexNAc]4               |
| 3+ | 1953.0766                  | 1953.0762                 | 0.2                    | ESVEINSTRPNNNTR                 | [Hex]20[HexNAc]4               |
|    |                            |                           |                        |                                 |                                |
| 4+ | 1402.5484                  | 1402.5512                 | 2                      | ESVEINSTRPNNNTR                 | [Hex]12[HexNAc]7[Fuc]1[NeuAc]1 |
| 4+ | 1432.8052                  | 1432.8078                 | 2                      | ESVEINSTRPNNNTR                 | [Hex]14[HexNAc]6[Fuc]1[NeuAc]1 |
| 4+ | 1505.5897                  | 1505.5816                 | 5                      | ESVEINSTRPNNNTR                 | [Hex]14[HexNAc]6[Fuc]1[NeuAc]2 |
| 4+ | 1524.0998                  | 1524.0908                 | 6                      | ESVEINSTRPNNNTR                 | [Hex]15[HexNAc]7[Fuc]1[NeuAc]1 |
| 4+ | 1596.8666                  | 1596.8647                 | 1                      | ESVEINSTRPNNNTR                 | [Hex]15[HexNAc]7[Fuc]1[NeuAc]2 |
| 4+ | 1303.0072                  | 1303.0062                 | 1                      | ESVEINSTRPNNNTR                 | [Hex]16[HexNAc]4               |
|    |                            |                           |                        |                                 |                                |
| 3+ | 1115.4634                  | 1115.4611                 | 2                      | ESVEINSTRPNNNTR                 | [Hex]7[HexNAc]2                |
| 3+ | 1169.4812                  | 1169.4787                 | 2                      | ESVEINSTRPNNNTR                 | [Hex]8[HexNAc]2                |

| CS | Experimental<br><i>m/z</i> | Theoretical<br><i>m/z</i> | Mass<br>Error<br>(ppm) | Peptide Sequence | Glycan                        |
|----|----------------------------|---------------------------|------------------------|------------------|-------------------------------|
| 3+ | 1223.4995                  | 1223.4963                 | 3                      | ESVEINCTRPNNNTR  | [Hex]9[HexNAc]2               |
| 3+ | 1034.7801                  | 1034.7769                 | 3                      | ESVEINCTRPNNNTR* | [Hex]3[HexNAc]4               |
| 3+ | 1083.4668                  | 1083.4629                 | 4                      | ESVEINCTRPNNNTR* | [Hex]3[HexNAc]4[Fuc]1         |
| 3+ | 1083.4706                  | 1083.4629                 | 7                      | ESVEINCTRPNNNTR* | [Hex]3[HexNAc]4[Fuc]1         |
| 3+ | 1151.1625                  | 1151.1560                 | 6                      | ESVEINCTRPNNNTR* | [Hex]3[HexNAc]5[Fuc]1         |
| 3+ | 1151.1616                  | 1151.1560                 | 5                      | ESVEINCTRPNNNTR* | [Hex]3[HexNAc]5[Fuc]1         |
| 3+ | 1218.8535                  | 1218.8492                 | 4                      | ESVEINCTRPNNNTR* | [Hex]3[HexNAc]6[Fuc]1         |
| 3+ | 1137.4774                  | 1137.4805                 | 3                      | ESVEINCTRPNNNTR* | [Hex]4[HexNAc]4 [Fuc]1        |
| 3+ | 1137.4842                  | 1137.4805                 | 3                      | ESVEINCTRPNNNTR* | [Hex]4[HexNAc]4 [Fuc]1        |
| 3+ | 1234.5148                  | 1234.5123                 | 2                      | ESVEINCTRPNNNTR* | [Hex]4[HexNAc]4[Fuc]1[NeuAc]1 |
| 3+ | 1234.5182                  | 1234.5123                 | 5                      | ESVEINCTRPNNNTR* | [Hex]4[HexNAc]4[Fuc]1[NeuAc]1 |
| 3+ | 1205.1765                  | 1205.1736                 | 2                      | ESVEINCTRPNNNTR* | [Hex]4[HexNAc]5[Fuc]1         |
| 3+ | 1205.1779                  | 1205.1736                 | 4                      | ESVEINCTRPNNNTR* | [Hex]4[HexNAc]5[Fuc]1         |
| 3+ | 1302.2065                  | 1302.2054                 | 1                      | ESVEINCTRPNNNTR* | [Hex]4[HexNAc]5[Fuc]1[NeuAc]1 |
| 3+ | 1302.2095                  | 1302.2054                 | 3                      | ESVEINCTRPNNNTR* | [Hex]4[HexNAc]5[Fuc]1[NeuAc]1 |
| 3+ | 1272.8577                  | 1272.8667                 | 7                      | ESVEINCTRPNNNTR* | [Hex]4[HexNAc]6[Fuc]1         |
| 3+ | 1272.8671                  | 1272.8667                 | 0.3                    | ESVEINCTRPNNNTR* | [Hex]4[HexNAc]6[Fuc]1         |
| 3+ | 1369.8956                  | 1369.8986                 | 2                      | ESVEINCTRPNNNTR* | [Hex]4[HexNAc]6[Fuc]1[NeuAc]1 |
| 3+ | 1337.2195                  | 1337.2159                 | 3                      | ESVEINCTRPNNNTR* | [Hex]5[HexNAc]4[Fuc]2[NeuAc]1 |
| 3+ | 1337.2185                  | 1337.2159                 | 2                      | ESVEINCTRPNNNTR* | [Hex]5[HexNAc]4[Fuc]2[NeuAc]1 |
| 3+ | 1210.5086                  | 1210.5053                 | 3                      | ESVEINCTRPNNNTR* | [Hex]5[HexNAc]5               |
| 3+ | 1259.2004                  | 1259.1912                 | 7                      | ESVEINCTRPNNNTR* | [Hex]5[HexNAc]5[Fuc]1         |
| 3+ | 1259.1979                  | 1259.1912                 | 5                      | ESVEINCTRPNNNTR* | [Hex]5[HexNAc]5[Fuc]1         |
| 3+ | 1356.2240                  | 1356.2230                 | 1                      | ESVEINCTRPNNNTR* | [Hex]5[HexNAc]5[Fuc]1[NeuAc]1 |
| 3+ | 1356.2265                  | 1356.2230                 | 3                      | ESVEINCTRPNNNTR* | [Hex]5[HexNAc]5[Fuc]1[NeuAc]1 |
| 3+ | 1453.2567                  | 1453.2548                 | 1                      | ESVEINCTRPNNNTR* | [Hex]5[HexNAc]5[Fuc]1[NeuAc]2 |
| 3+ | 1453.2573                  | 1453.2548                 | 2                      | ESVEINCTRPNNNTR* | [Hex]5[HexNAc]5[Fuc]1[NeuAc]2 |
| 3+ | 1307.5401                  | 1307.5371                 | 2                      | ESVEINCTRPNNNTR* | [Hex]5[HexNAc]5[NeuAc]1       |
| 3+ | 1423.9212                  | 1423.9161                 | 4                      | ESVEINCTRPNNNTR* | [Hex]5[HexNAc]6[Fuc]1[NeuAc]1 |
| 3+ | 1313.2071                  | 1313.2088                 | 1                      | ESVEINCTRPNNNTR* | [Hex]6[HexNAc]5[Fuc]1         |
| 3+ | 1410.2322                  | 1410.2406                 | 6                      | ESVEINCTRPNNNTR* | [Hex]6[HexNAc]5[Fuc]1[NeuAc]1 |
| 3+ | 1380.9091                  | 1380.9020                 | 5                      | ESVEINCTRPNNNTR* | [Hex]6[HexNAc]6[Fuc]1         |
| 3+ | 1477.9387                  | 1477.9338                 | 3                      | ESVEINCTRPNNNTR* | [Hex]6[HexNAc]6[Fuc]1[NeuAc]1 |
| 3+ | 1477.9388                  | 1477.9338                 | 3                      | ESVEINCTRPNNNTR* | [Hex]6[HexNAc]6[Fuc]1[NeuAc]1 |
| 3+ | 1574.9712                  | 1574.9656                 | 4                      | ESVEINCTRPNNNTR* | [Hex]6[HexNAc]6[Fuc]1[NeuAc]2 |
| 3+ | 1574.9679                  | 1574.9656                 | 1                      | ESVEINCTRPNNNTR* | [Hex]6[HexNAc]6[Fuc]1[NeuAc]2 |
| 3+ | 1671.9970                  | 1671.9974                 | 0.2                    | ESVEINCTRPNNNTR* | [Hex]6[HexNAc]6[Fuc]1[NeuAc]3 |
| 3+ | 1599.6537                  | 1599.6444                 | 6                      | ESVEINCTRPNNNTR* | [Hex]7[HexNAc]7[Fuc]1[NeuAc]1 |
| 3+ | 1696.6713                  | 1696.6763                 | 3                      | ESVEINCTRPNNNTR* | [Hex]7[HexNAc]7[Fuc]1[NeuAc]2 |
| 3+ | 601.9497                   | 601.9516                  | 3                      | ESVEINCTRPNNNTR  | non-glycosylated              |
| 2+ | 1020.4251                  | 1020.4203                 | 5                      | QAHCNISR         | [Hex]4[HexNAc]2               |
| 2+ | 1101.4552                  | 1101.4466                 | 8                      | QAHCNISR         | [Hex]5[HexNAc]2               |
| 2+ | 1182.4781                  | 1182.4731                 | 4                      | QAHCNISR         | [Hex]6[HexNAc]2               |
| 2+ | 1263.5059                  | 1263.4995                 | 5                      | QAHCNISR         | [Hex]7[HexNAc]2               |
| 2+ | 1344.5313                  | 1344.5259                 | 4                      | QAHCNISR         | [Hex]8[HexNAc]2               |
| 2+ | 1425.5570                  | 1425.5523                 | 3                      | QAHCNISR         | [Hex]9[HexNAc]2               |
| 2+ | 493.2343                   | 493.2352                  | 2                      | QAHCNISR         | non-glycosylated              |
| 2+ | 591.7820                   | 591.7799                  | 4                      | WNDTLK           | [HexNAc]2                     |
| 2+ | 672.8087                   | 672.8063                  | 4                      | WNDTLK           | [Hex]1[HexNAc]2               |
| 2+ | 753.8352                   | 753.8327                  | 3                      | WNDTLK           | [Hex]2[HexNAc]2               |
| 2+ | 1029.9389                  | 1029.9411                 | 2                      | WNDTLK           | [Hex]2[HexNAc]4[Fuc]1         |

| CS | Experimental<br><i>m/z</i> | Theoretical<br><i>m/z</i> | Mass<br>Error<br>(ppm) | Peptide Sequence | Glycan                        |
|----|----------------------------|---------------------------|------------------------|------------------|-------------------------------|
| 2+ | 834.8629                   | 834.8591                  | 5                      | WNDTLK           | [Hex]3[HexNAc]2               |
| 2+ | 1009.4318                  | 1009.4278                 | 4                      | WNDTLK           | [Hex]3[HexNAc]3[Fuc]1         |
| 2+ | 1037.9427                  | 1037.9385                 | 4                      | WNDTLK           | [Hex]3[HexNAc]4               |
| 2+ | 1110.9730                  | 1110.9674                 | 5                      | WNDTLK           | [Hex]3[HexNAc]4[Fuc]1         |
| 2+ | 915.8894                   | 915.8856                  | 4                      | WNDTLK           | [Hex]4[HexNAc]2               |
| 2+ | 988.9159                   | 988.9145                  | 1                      | WNDTLK           | [Hex]4[HexNAc]2[Fuc]1         |
| 2+ | 1017.4214                  | 1017.4252                 | 4                      | WNDTLK           | [Hex]4[HexNAc]3               |
| 2+ | 1090.4599                  | 1090.4542                 | 5                      | WNDTLK           | [Hex]4[HexNAc]3[Fuc]1         |
| 2+ | 1191.9891                  | 1191.9939                 | 4                      | WNDTLK           | [Hex]4[HexNAc]4 [Fuc]1        |
| 3+ | 892.0352                   | 892.0301                  | 6                      | WNDTLK           | [Hex]4[HexNAc]4[Fuc]1[NeuAc]1 |
| 2+ | 996.9172                   | 996.9119                  | 5                      | WNDTLK           | [Hex]5[HexNAc]2               |
| 2+ | 1098.4588                  | 1098.4516                 | 7                      | WNDTLK           | [Hex]5[HexNAc]3               |
| 2+ | 1244.0013                  | 1243.9993                 | 2                      | WNDTLK           | [Hex]5[HexNAc]3 [NeuAc]1      |
| 2+ | 1317.0280                  | 1317.0283                 | 0.2                    | WNDTLK           | [Hex]5[HexNAc]3[Fuc]1[NeuAc]1 |
| 2+ | 1418.5566                  | 1418.5680                 | 8                      | WNDTLK           | [Hex]5[HexNAc]4[Fuc]1[NeuAc]1 |
| 2+ | 1564.1122                  | 1564.1157                 | 5                      | WNDTLK           | [Hex]5[HexNAc]4[Fuc]1[NeuAc]2 |
| 2+ | 1077.9432                  | 1077.9384                 | 4                      | WNDTLK           | [Hex]6[HexNAc]2               |
| 2+ | 1179.4770                  | 1179.4780                 | 1                      | WNDTLK           | [Hex]6[HexNAc]3               |
| 2+ | 1325.0144                  | 1325.0257                 | 9                      | WNDTLK           | [Hex]6[HexNAc]3[NeuAc]1       |
| 3+ | 1164.7937                  | 1164.7903                 | 3                      | WNDTLK           | [Hex]6[HexNAc]5[Fuc]1[NeuAc]2 |
| 2+ | 1158.9695                  | 1158.9648                 | 4                      | WNDTLK           | [Hex]7[HexNAc]2               |
| 3+ | 1286.5094                  | 1286.5010                 | 7                      | WNDTLK           | [Hex]7[HexNAc]6[Fuc]1[NeuAc]2 |
| 3+ | 1383.5398                  | 1383.5328                 | 5                      | WNDTLK           | [Hex]7[HexNAc]6[Fuc]1[NeuAc]3 |
| 2+ | 1239.9934                  | 1239.9912                 | 2                      | WNDTLK           | [Hex]8[HexNAc]2               |
| 2+ | 1321.0202                  | 1321.0176                 | 2                      | WNDTLK           | [Hex]9[HexNAc]2               |
| 2+ | 1402.0465                  | 1402.0440                 | 2                      | WNDTLK           | [Hex]10[HexNAc]2              |
| 2+ | 1483.0732                  | 1483.0704                 | 2                      | WNDTLK           | [Hex]11[HexNAc]2              |
|    |                            |                           |                        |                  |                               |
| 1+ | 776.3955                   | 776.3938                  | 2                      | WNDTLK           | non-glycosylated              |
|    |                            |                           |                        |                  |                               |
| 2+ | 633.8208                   | 633.8171                  | 6                      | LREQFENK         | [HexNAc]                      |
| 2+ | 735.3609                   | 735.3596                  | 2                      | LREQFENK         | [HexNAc]2                     |
| 2+ | 816.3877                   | 816.3859                  | 2                      | LREQFENK         | [Hex]1[HexNAc]2               |
| 2+ | 1071.9831                  | 1071.9810                 | 2                      | LREQFENK         | [Hex]2[HexNAc]3[Fuc]1         |
| 2+ | 897.4147                   | 897.4124                  | 3                      | LREQFENK         | [Hex]2[HexNAc]2               |
| 2+ | 978.4417                   | 978.4388                  | 3                      | LREQFENK         | [Hex]3[HexNAc]2               |
| 2+ | 1051.4696                  | 1051.4677                 | 2                      | LREQFENK         | [Hex]3[HexNAc]2[Fuc]1         |
| 2+ | 1079.9846                  | 1079.9785                 | 6                      | LREQFENK         | [Hex]3[HexNAc]3               |
| 2+ | 1153.0054                  | 1153.0074                 | 2                      | LREQFENK         | [Hex]3[HexNAc]3[Fuc]1         |
| 2+ | 1254.5466                  | 1254.5471                 | 0.4                    | LREQFENK         | [Hex]3[HexNAc]4[Fuc]1         |
| 2+ | 1356.0807                  | 1356.0868                 | 4                      | LREQFENK         | [Hex]3[HexNAc]5[Fuc]1         |
| 2+ | 1059.4678                  | 1059.4652                 | 2                      | LREQFENK         | [Hex]4[HexNAc]2               |
| 2+ | 1234.0327                  | 1234.0338                 | 1                      | LREQFENK         | [Hex]4[HexNAc]3[Fuc]1         |
| 2+ | 1379.5887                  | 1379.5815                 | 5                      | LREQFENK         | [Hex]4[HexNAc]3[Fuc]1[NeuAc]1 |
| 2+ | 1335.5769                  | 1335.5735                 | 3                      | LREQFENK         | [Hex]4[HexNAc]4 [Fuc]1        |
| 2+ | 1481.1179                  | 1481.1212                 | 2                      | LREQFENK         | [Hex]4[HexNAc]4[Fuc]1[NeuAc]1 |
| 2+ | 1437.1237                  | 1437.1132                 | 7                      | LREQFENK         | [Hex]4[HexNAc]5[Fuc]1         |
| 2+ | 1140.4942                  | 1140.4916                 | 2                      | LREQFENK         | [Hex]5[HexNAc]2               |
| 2+ | 1416.6023                  | 1416.5999                 | 2                      | LREQFENK         | [Hex]5[HexNAc]4[Fuc]1         |
| 2+ | 1562.1398                  | 1562.1476                 | 5                      | LREQFENK         | [Hex]5[HexNAc]4[Fuc]1[NeuAc]1 |
| 2+ | 1707.6941                  | 1707.6953                 | 1                      | LREQFENK         | [Hex]5[HexNAc]4[Fuc]1[NeuAc]2 |
| 2+ | 1221.5204                  | 1221.5180                 | 2                      | LREQFENK         | [Hex]6[HexNAc]2               |
| 2+ | 1541.6346                  | 1541.6343                 | 0.2                    | LREQFENK         | [Hex]6[HexNAc]3[Fuc]1[NeuAc]1 |
| 2+ | 1302.5474                  | 1302.5444                 | 2                      | LREQFENK         | [Hex]7[HexNAc]2               |
| 2+ | 1383.5730                  | 1383.5708                 | 2                      | LREQFENK         | [Hex]8[HexNAc]2               |
| 2+ | 1464.5988                  | 1464.5972                 | 1                      | LREQFENK         | [Hex]9[HexNAc]2               |

| CS | Experimental<br><i>m/z</i> | Theoretical<br><i>m/z</i> | Mass<br>Error<br>(ppm) | Peptide Sequence     | Glycan                        |
|----|----------------------------|---------------------------|------------------------|----------------------|-------------------------------|
| 2+ | 1545.6297                  | 1545.6236                 | 4                      | LREQFENK             | [Hex]10[HexNAc]2              |
| 3+ | 788.0122                   | 788.0145                  | 3                      | LREQFENK             | [Hex]3[HexNAc]4               |
| 3+ | 972.0839                   | 972.0868                  | 3                      | LREQFENK             | [Hex]3[HexNAc]6[Fuc]1         |
| 3+ | 774.3399                   | 774.3390                  | 1                      | LREQFENK             | [Hex]4[HexNAc]3               |
| 3+ | 1055.4386                  | 1055.4431                 | 4                      | LREQFENK             | [Hex]4[HexNAc]5[Fuc]1[NeuAc]1 |
| 3+ | 1026.1082                  | 1026.1044                 | 4                      | LREQFENK             | [Hex]4[HexNAc]6[Fuc]1         |
| 3+ | 1123.1353                  | 1123.1362                 | 1                      | LREQFENK             | [Hex]4[HexNAc]6[Fuc]1[NeuAc]1 |
| 3+ | 828.3510                   | 828.3566                  | 7                      | LREQFENK             | [Hex]5[HexNAc]3               |
| 3+ | 1012.4254                  | 1012.4289                 | 3                      | LREQFENK             | [Hex]5[HexNAc]5[Fuc]1         |
| 3+ | 1109.4738                  | 1109.4607                 | 12                     | LREQFENK             | [Hex]5[HexNAc]5[Fuc]1[NeuAc]1 |
| 3+ | 1206.5043                  | 1206.4925                 | 10                     | LREQFENK             | [Hex]5[HexNAc]5[Fuc]1[NeuAc]2 |
| 3+ | 1177.1464                  | 1177.1538                 | 6                      | LREQFENK             | [Hex]5[HexNAc]6[Fuc]1[NeuAc]1 |
| 3+ | 1274.1944                  | 1274.1856                 | 7                      | LREQFENK             | [Hex]5[HexNAc]6[Fuc]1[NeuAc]2 |
| 3+ | 931.0615                   | 931.0602                  | 1                      | LREQFENK             | [Hex]6[HexNAc]3[Fuc]1         |
| 3+ | 979.3987                   | 979.4060                  | 7                      | LREQFENK             | [Hex]6[HexNAc]3[NeuAc]1       |
| 3+ | 1163.4810                  | 1163.4783                 | 2                      | LREQFENK             | [Hex]6[HexNAc]5[Fuc]1[NeuAc]1 |
| 3+ | 1260.5148                  | 1260.5101                 | 4                      | LREQFENK             | [Hex]6[HexNAc]5[Fuc]1[NeuAc]2 |
| 3+ | 1357.5450                  | 1357.5419                 | 2                      | LREQFENK             | [Hex]6[HexNAc]5[Fuc]1[NeuAc]3 |
| 3+ | 1231.1712                  | 1231.1714                 | 0.2                    | LREQFENK             | [Hex]6[HexNAc]6[Fuc]1[NeuAc]1 |
| 3+ | 1328.2038                  | 1328.2032                 | 0.5                    | LREQFENK             | [Hex]6[HexNAc]6[Fuc]1[NeuAc]2 |
| 3+ | 1425.2439                  | 1425.2350                 | 6                      | LREQFENK             | [Hex]6[HexNAc]6[Fuc]1[NeuAc]3 |
| 3+ | 1285.1949                  | 1285.1890                 | 5                      | LREQFENK             | [Hex]7[HexNAc]6[Fuc]1[NeuAc]1 |
| 3+ | 1382.2255                  | 1382.2208                 | 3                      | LREQFENK             | [Hex]7[HexNAc]6[Fuc]1[NeuAc]2 |
| 3+ | 1479.2546                  | 1479.2526                 | 1                      | LREQFENK             | [Hex]7[HexNAc]6[Fuc]1[NeuAc]3 |
| 3+ | 1576.2890                  | 1576.2844                 | 3                      | LREQFENK             | [Hex]7[HexNAc]6[Fuc]1[NeuAc]4 |
| 3+ | 1352.8679                  | 1352.8821                 | 10                     | LREQFENK             | [Hex]7[HexNAc]7[Fuc]1[NeuAc]1 |
| 3+ | 1406.8921                  | 1406.8997                 | 5                      | LREQFENK             | [Hex]8[HexNAc]7[Fuc]1[NeuAc]1 |
| 3+ | 1503.9438                  | 1503.9315                 | 8                      | LREQFENK             | [Hex]8[HexNAc]7[Fuc]1[NeuAc]2 |
| 3+ | 1600.9471                  | 1600.9633                 | 10                     | LREQFENK             | [Hex]8[HexNAc]7[Fuc]1[NeuAc]3 |
| 3+ | 1697.9810                  | 1697.9951                 | 8                      | LREQFENK             | [Hex]8[HexNAc]7[Fuc]1[NeuAc]4 |
| 4+ | 1292.2516                  | 1292.2574                 | 4                      | LREQFENK             | [Hex]9[HexNAc]8[Fuc]1[NeuAc]3 |
| 2+ | 532.2815                   | 532.2802                  | 2                      | LREQFENK             | non-glycosylated              |
| 2+ | 1021.9809                  | 1021.9753                 | 5                      | TIVFNHSSGGDPEIVMH    | [HexNAc]                      |
| 2+ | 1204.5488                  | 1204.5441                 | 4                      | TIVFNHSSGGDPEIVMH    | [Hex]1[HexNAc]2               |
| 2+ | 1285.5750                  | 1285.5705                 | 4                      | TIVFNHSSGGDPEIVMH    | [Hex]2[HexNAc]2               |
| 2+ | 1366.5948                  | 1366.5969                 | 2                      | TIVFNHSSGGDPEIVMH    | [Hex]3[HexNAc]2               |
| 2+ | 1447.6256                  | 1447.6234                 | 2                      | TIVFNHSSGGDPEIVMH    | [Hex]4[HexNAc]2               |
| 2+ | 1528.6507                  | 1528.6497                 | 1                      | TIVFNHSSGGDPEIVMH    | [Hex]5[HexNAc]2               |
| 2+ | 1771.7236                  | 1771.7290                 | 3                      | TIVFNHSSGGDPEIVMH    | [Hex]8[HexNAc]2               |
| 2+ | 1852.7488                  | 1852.7554                 | 4                      | TIVFNHSSGGDPEIVMH    | [Hex]9[HexNAc]2               |
| 3+ | 749.3487                   | 749.3476                  | 1                      | TIVFNHSSGGDPEIVMH    | [HexNAc]2                     |
| 3+ | 1095.4717                  | 1095.4726                 | 1                      | TIVFNHSSGGDPEIVMH    | [Hex]3[HexNAc]4[Fuc]1         |
| 3+ | 1087.1346                  | 1087.1287                 | 5                      | TIVFNHSSGGDPEIVMH    | [Hex]5[HexNAc]3               |
| 3+ | 1127.4743                  | 1127.4708                 | 3                      | TIVFNHSSGGDPEIVMH    | [Hex]6[HexNAc]2               |
| 3+ | 1181.4917                  | 1181.4884                 | 3                      | TIVFNHSSGGDPEIVMH    | [Hex]7[HexNAc]2               |
| 3+ | 1289.5275                  | 1289.5236                 | 3                      | TIVFNHSSGGDPEIVMH    | [Hex]10[HexNAc]2              |
| 3+ | 1343.5435                  | 1343.5412                 | 2                      | TIVFNHSSGGDPEIVMH    | [Hex]11[HexNAc]2              |
| 2+ | 920.4364                   | 920.4383                  | 2                      | TIVFNHSSGGDPEIVMH    | non-glycosylated              |
| 3+ | 1763.0115                  | 1763.0168                 | 3                      | NNNTEGSNNTEGNTITLPCR | [Hex]14[HexNAc]4              |
| 3+ | 1817.0383                  | 1817.0344                 | 2                      | NNNTEGSNNTEGNTITLPCR | [Hex]15[HexNAc]4              |

| CS | Experimental<br><i>m/z</i> | Theoretical<br><i>m/z</i> | Mass<br>Error<br>(ppm) | Peptide Sequence     | Glycan                        |
|----|----------------------------|---------------------------|------------------------|----------------------|-------------------------------|
| 3+ | 1871.0556                  | 1871.0520                 | 2                      | NNNTEGSNNTEGNTITLPCR | [Hex]16[HexNAc]4              |
| 3+ | 1925.0742                  | 1925.0696                 | 2                      | NNNTEGSNNTEGNTITLPCR | [Hex]17[HexNAc]4              |
| 3+ | 1979.0972                  | 1979.0872                 | 5                      | NNNTEGSNNTEGNTITLPCR | [Hex]18[HexNAc]4              |
|    |                            |                           |                        |                      |                               |
| 2+ | 769.3976                   | 769.3954                  | 3                      | CSSNITGLLLTR         | [HexNAc]                      |
| 2+ | 870.9399                   | 870.9379                  | 2                      | CSSNITGLLLTR         | [HexNAc]2                     |
| 2+ | 951.9664                   | 951.9642                  | 2                      | CSSNITGLLLTR         | [Hex]1[HexNAc]2               |
| 3+ | 688.9972                   | 688.9962                  | 1                      | CSSNITGLLLTR         | [Hex]2[HexNAc]2               |
| 2+ | 1114.0195                  | 1114.0171                 | 2                      | CSSNITGLLLTR         | [Hex]3[HexNAc]2               |
| 2+ | 1195.0459                  | 1195.0435                 | 2                      | CSSNITGLLLTR         | [Hex]4[HexNAc]2               |
| 2+ | 1276.0741                  | 1276.0699                 | 3                      | CSSNITGLLLTR         | [Hex]5[HexNAc]2               |
| 2+ | 1357.0991                  | 1357.0963                 | 2                      | CSSNITGLLLTR         | [Hex]6[HexNAc]2               |
| 2+ | 1438.1271                  | 1438.1227                 | 3                      | CSSNITGLLLTR         | [Hex]7[HexNAc]2               |
| 2+ | 1519.1475                  | 1519.1491                 | 1                      | CSSNITGLLLTR         | [Hex]8[HexNAc]2               |
| 2+ | 1600.1778                  | 1600.1755                 | 1                      | CSSNITGLLLTR         | [Hex]9[HexNAc]2               |
| 2+ | 1681.2063                  | 1681.2019                 | 3                      | CSSNITGLLLTR         | [Hex]10[HexNAc]2              |
|    |                            |                           |                        |                      |                               |
| 2+ | 667.8590                   | 667.8585                  | 1                      | CSSNITGLLLTR         | non-glycosylated              |
|    |                            |                           |                        |                      |                               |
| 3+ | 765.6832                   | 765.6799                  | 4                      | DGGINENGTEIFRPGGGDMR | [HexNAc]                      |
| 3+ | 833.3777                   | 833.3749                  | 3                      | DGGINENGTEIFRPGGGDMR | [HexNAc]2                     |
| 3+ | 887.3954                   | 887.3924                  | 3                      | DGGINENGTEIFRPGGGDMR | [Hex]1[HexNAc]2               |
| 3+ | 941.4145                   | 941.4101                  | 5                      | DGGINENGTEIFRPGGGDMR | [Hex]2[HexNAc]2               |
| 3+ | 995.4317                   | 995.4277                  | 4                      | DGGINENGTEIFRPGGGDMR | [Hex]3[HexNAc]2               |
| 3+ | 1179.5059                  | 1179.4999                 | 5                      | DGGINENGTEIFRPGGGDMR | [Hex]3[HexNAc]4[Fuc]1         |
| 3+ | 1247.1941                  | 1247.1930                 | 1                      | DGGINENGTEIFRPGGGDMR | [Hex]3[HexNAc]5[Fuc]1         |
| 3+ | 1314.8761                  | 1314.8862                 | 8                      | DGGINENGTEIFRPGGGDMR | [Hex]3[HexNAc]6[Fuc]1         |
| 3+ | 1049.4438                  | 1049.4453                 | 1                      | DGGINENGTEIFRPGGGDMR | [Hex]4[HexNAc]2               |
| 3+ | 1165.8260                  | 1165.8244                 | 1                      | DGGINENGTEIFRPGGGDMR | [Hex]4[HexNAc]3[Fuc]1         |
| 3+ | 1233.5193                  | 1233.5175                 | 1                      | DGGINENGTEIFRPGGGDMR | [Hex]4[HexNAc]4[Fuc]1         |
| 3+ | 1330.5537                  | 1330.5493                 | 3                      | DGGINENGTEIFRPGGGDMR | [Hex]4[HexNAc]4[Fuc]1[NeuAc]1 |
| 3+ | 1301.2049                  | 1301.2106                 | 4                      | DGGINENGTEIFRPGGGDMR | [Hex]4[HexNAc]5[Fuc]1         |
| 3+ | 1398.2421                  | 1398.2424                 | 0.2                    | DGGINENGTEIFRPGGGDMR | [Hex]4[HexNAc]5[Fuc]1[NeuAc]1 |
| 3+ | 1368.8982                  | 1368.9037                 | 0.2                    | DGGINENGTEIFRPGGGDMR | [Hex]4[HexNAc]6[Fuc]1         |
| 3+ | 1465.9381                  | 1465.9356                 | 2                      | DGGINENGTEIFRPGGGDMR | [Hex]4[HexNAc]6[Fuc]1[NeuAc]1 |
| 3+ | 1103.4682                  | 1103.4629                 | 5                      | DGGINENGTEIFRPGGGDMR | [Hex]5[HexNAc]2               |
| 3+ | 1171.1566                  | 1171.1560                 | 1                      | DGGINENGTEIFRPGGGDMR | [Hex]5[HexNAc]3               |
| 3+ | 1238.8410                  | 1238.8491                 | 7                      | DGGINENGTEIFRPGGGDMR | [Hex]5[HexNAc]4               |
| 3+ | 1384.5799                  | 1384.5669                 | 9                      | DGGINENGTEIFRPGGGDMR | [Hex]5[HexNAc]4[Fuc]1[NeuAc]1 |
| 3+ | 1481.5984                  | 1481.5987                 | 0.2                    | DGGINENGTEIFRPGGGDMR | [Hex]5[HexNAc]4[Fuc]1[NeuAc]2 |
| 3+ | 1452.2645                  | 1452.2600                 | 3                      | DGGINENGTEIFRPGGGDMR | [Hex]5[HexNAc]5[Fuc]1[NeuAc]1 |
| 3+ | 1549.3007                  | 1549.2918                 | 6                      | DGGINENGTEIFRPGGGDMR | [Hex]5[HexNAc]5[Fuc]1[NeuAc]2 |
| 3+ | 1519.9538                  | 1519.9531                 | 0.5                    | DGGINENGTEIFRPGGGDMR | [Hex]5[HexNAc]6[Fuc]1[NeuAc]1 |
| 3+ | 1616.9932                  | 1616.9850                 | 5                      | DGGINENGTEIFRPGGGDMR | [Hex]5[HexNAc]6[Fuc]1[NeuAc]2 |
| 3+ | 1157.4839                  | 1157.4805                 | 3                      | DGGINENGTEIFRPGGGDMR | [Hex]6[HexNAc]2               |
| 3+ | 1225.1735                  | 1225.1736                 | 0.1                    | DGGINENGTEIFRPGGGDMR | [Hex]6[HexNAc]3               |
| 3+ | 1273.8490                  | 1273.8596                 | 8                      | DGGINENGTEIFRPGGGDMR | [Hex]6[HexNAc]3[Fuc]1         |
| 3+ | 1409.2526                  | 1409.2458                 | 1                      | DGGINENGTEIFRPGGGDMR | [Hex]6[HexNAc]5[Fuc]1         |
| 3+ | 1506.2826                  | 1506.2776                 | 3                      | DGGINENGTEIFRPGGGDMR | [Hex]6[HexNAc]5[Fuc]1[NeuAc]1 |
| 3+ | 1603.3107                  | 1603.3094                 | 1                      | DGGINENGTEIFRPGGGDMR | [Hex]6[HexNAc]5[Fuc]1[NeuAc]2 |
| 3+ | 1700.3467                  | 1700.3412                 | 3                      | DGGINENGTEIFRPGGGDMR | [Hex]6[HexNAc]5[Fuc]1[NeuAc]3 |
| 3+ | 1573.9804                  | 1573.9708                 | 6                      | DGGINENGTEIFRPGGGDMR | [Hex]6[HexNAc]6[Fuc]1[NeuAc]1 |
| 3+ | 1671.0066                  | 1671.0026                 | 2                      | DGGINENGTEIFRPGGGDMR | [Hex]6[HexNAc]6[Fuc]1[NeuAc]2 |
| 3+ | 1768.0306                  | 1768.0343                 | 2                      | DGGINENGTEIFRPGGGDMR | [Hex]6[HexNAc]6[Fuc]1[NeuAc]3 |
| 3+ | 1211.5037                  | 1211.4981                 | 5                      | DGGINENGTEIFRPGGGDMR | [Hex]7[HexNAc]2               |
| 3+ | 1627.9933                  | 1627.9884                 | 3                      | DGGINENGTEIFRPGGGDMR | [Hex]7[HexNAc]6[Fuc]1[NeuAc]1 |



| CS | Experimental<br><i>m/z</i> | Theoretical<br><i>m/z</i> | Mass<br>Error<br>(ppm) | Peptide Sequence     | Glycan                         |
|----|----------------------------|---------------------------|------------------------|----------------------|--------------------------------|
| 3+ | 1725.0241                  | 1725.0202                 | 2                      | DGGINENGTEIFRPGGGDMR | [Hex]7[HexNAc]6[Fuc]1[NeuAc]2  |
| 3+ | 1822.0556                  | 1822.0520                 | 2                      | DGGINENGTEIFRPGGGDMR | [Hex]7[HexNAc]6[Fuc]1[NeuAc]3  |
| 3+ | 1889.7410                  | 1889.7451                 | 2                      | DGGINENGTEIFRPGGGDMR | [Hex]7[HexNAc]7[Fuc]1[NeuAc]3  |
| 3+ | 1265.5209                  | 1265.5157                 | 4                      | DGGINENGTEIFRPGGGDMR | [Hex]8[HexNAc]2                |
| 3+ | 1846.7328                  | 1846.7309                 | 1                      | DGGINENGTEIFRPGGGDMR | [Hex]8[HexNAc]7[Fuc]1[NeuAc]2  |
| 3+ | 1943.7662                  | 1943.7627                 | 2                      | DGGINENGTEIFRPGGGDMR | [Hex]8[HexNAc]7[Fuc]1[NeuAc]3  |
| 3+ | 1319.5338                  | 1319.5333                 | 0.4                    | DGGINENGTEIFRPGGGDMR | [Hex]9[HexNAc]2                |
| 3+ | 1373.5585                  | 1373.5509                 | 6                      | DGGINENGTEIFRPGGGDMR | [Hex]10[HexNAc]2               |
| 3+ | 1427.5673                  | 1427.5685                 | 1                      | DGGINENGTEIFRPGGGDMR | [Hex]11[HexNAc]2               |
|    |                            |                           |                        |                      |                                |
| 2+ | 1046.4812                  | 1046.4792                 | 2                      | DGGINENGTEIFRPGGGDMR | non-glycosylated               |
|    |                            |                           |                        |                      |                                |
| 3+ | 1211.5154                  | 1211.5199                 | 4                      | LICTTAVPWNASWSNK     | [Hex]6[HexNAc]4                |
| 3+ | 1265.5367                  | 1265.5375                 | 1                      | LICTTAVPWNASWSNK     | [Hex]7[HexNAc]4                |
| 3+ | 1319.5540                  | 1319.5551                 | 1                      | LICTTAVPWNASWSNK     | [Hex]8[HexNAc]4                |
| 3+ | 1373.5732                  | 1373.5728                 | 0.3                    | LICTTAVPWNASWSNK     | [Hex]9[HexNAc]4                |
| 3+ | 1427.5899                  | 1427.5904                 | 0.4                    | LICTTAVPWNASWSNK     | [Hex]10[HexNAc]4               |
| 3+ | 1805.7137                  | 1805.7136                 | 0.1                    | LICTTAVPWNASWSNK     | [Hex]10[HexNAc]6[Fuc]1[NeuAc]2 |
| 3+ | 1873.4094                  | 1873.4193                 | 5                      | LICTTAVPWNASWSNK     | [Hex]10[HexNAc]7[Fuc]1[NeuAc]2 |
| 3+ | 1481.6087                  | 1481.6080                 | 0                      | LICTTAVPWNASWSNK     | [Hex]11[HexNAc]4               |
| 3+ | 1535.6277                  | 1535.6256                 | 1                      | LICTTAVPWNASWSNK     | [Hex]12[HexNAc]4               |
| 3+ | 1589.6411                  | 1589.6432                 | 1                      | LICTTAVPWNASWSNK     | [Hex]13[HexNAc]4               |
| 3+ | 1643.6589                  | 1643.6608                 | 1                      | LICTTAVPWNASWSNK     | [Hex]14[HexNAc]4               |
| 3+ | 1711.3492                  | 1711.3539                 | 3                      | LICTTAVPWNASWSNK     | [Hex]14[HexNAc]5               |
| 3+ | 1697.6758                  | 1697.6784                 | 2                      | LICTTAVPWNASWSNK     | [Hex]15[HexNAc]4               |
| 3+ | 1751.6922                  | 1751.6960                 | 2                      | LICTTAVPWNASWSNK     | [Hex]16[HexNAc]4               |
| 3+ | 1805.7185                  | 1805.7136                 | 3                      | LICTTAVPWNASWSNK     | [Hex]17[HexNAc]4               |
| 3+ | 1859.7235                  | 1859.7312                 | 4                      | LICTTAVPWNASWSNK     | [Hex]18[HexNAc]4               |
| 3+ | 1913.7336                  | 1913.7488                 | 8                      | LICTTAVPWNASWSNK     | [Hex]19[HexNAc]4               |
| 3+ | 1967.7671                  | 1967.7664                 | 0.4                    | LICTTAVPWNASWSNK     | [Hex]20[HexNAc]4               |
|    |                            |                           |                        |                      |                                |
| 4+ | 1209.0022                  | 1208.9987                 | 3                      | LICTTAVPWNASWSNK     | [Hex]10[HexNAc]6[Fuc]1         |
| 4+ | 1162.2359                  | 1162.2276                 | 7                      | LICTTAVPWNASWSNK     | [Hex]11[HexNAc]5               |
| 4+ | 1243.2479                  | 1243.2540                 | 5                      | LICTTAVPWNASWSNK     | [Hex]13[HexNAc]5               |
|    |                            |                           |                        |                      |                                |
| 2+ | 1026.0016                  | 1025.9960                 | 5                      | LICTTAVPWNASWSNK     | [HexNAc]                       |
| 2+ | 1127.5406                  | 1127.5385                 | 2                      | LICTTAVPWNASWSNK     | [HexNAc]2                      |
| 2+ | 1289.5929                  | 1289.5913                 | 1                      | LICTTAVPWNASWSNK     | [Hex]2[HexNAc]2                |
| 2+ | 1370.6194                  | 1370.6177                 | 1                      | LICTTAVPWNASWSNK     | [Hex]3[HexNAc]2                |
| 2+ | 1472.1553                  | 1472.1574                 | 1                      | LICTTAVPWNASWSNK     | [Hex]3[HexNAc]3                |
| 2+ | 1451.6454                  | 1451.6441                 | 1                      | LICTTAVPWNASWSNK     | [Hex]4[HexNAc]2                |
| 2+ | 1553.1678                  | 1553.1838                 | 10                     | LICTTAVPWNASWSNK     | [Hex]4[HexNAc]3                |
| 2+ | 1532.6730                  | 1532.6705                 | 2                      | LICTTAVPWNASWSNK     | [Hex]5[HexNAc]2                |
| 2+ | 1613.6990                  | 1613.6969                 | 1                      | LICTTAVPWNASWSNK     | [Hex]6[HexNAc]2                |
| 2+ | 1775.7493                  | 1775.7497                 | 0.2                    | LICTTAVPWNASWSNK     | [Hex]8[HexNAc]2                |
| 2+ | 1856.7817                  | 1856.7761                 | 3                      | LICTTAVPWNASWSNK     | [Hex]9[HexNAc]2                |
|    |                            |                           |                        |                      |                                |
| 3+ | 806.0462                   | 806.0456                  | 1                      | LICTTAVPWNASWSNK     | [Hex]1[HexNAc]2                |
| 3+ | 1292.2077                  | 1292.2041                 | 3                      | LICTTAVPWNASWSNK     | [Hex]10[HexNAc]2               |
| 3+ | 1346.2251                  | 1346.2217                 | 3                      | LICTTAVPWNASWSNK     | [Hex]11[HexNAc]2               |
| 3+ | 1165.8356                  | 1165.8462                 | 9                      | LICTTAVPWNASWSNK     | [Hex]3[HexNAc]5[Fuc]1          |
| 3+ | 1084.4792                  | 1084.4776                 | 1                      | LICTTAVPWNASWSNK     | [Hex]4[HexNAc]3[Fuc]1          |
| 3+ | 1103.4888                  | 1103.4847                 | 4                      | LICTTAVPWNASWSNK     | [Hex]4[HexNAc]4                |
| 3+ | 1152.1777                  | 1152.1707                 | 6                      | LICTTAVPWNASWSNK     | [Hex]4[HexNAc]4[Fuc]1          |
| 3+ | 1089.8147                  | 1089.8092                 | 5                      | LICTTAVPWNASWSNK     | [Hex]5[HexNAc]3                |
| 3+ | 1235.5170                  | 1235.5270                 | 8                      | LICTTAVPWNASWSNK     | [Hex]5[HexNAc]3[Fuc]1[NeuAc]1  |

| CS | Experimental<br><i>m/z</i> | Theoretical<br><i>m/z</i> | Mass<br>Error<br>(ppm) | Peptide Sequence  | Glycan                        |
|----|----------------------------|---------------------------|------------------------|-------------------|-------------------------------|
| 3+ | 1157.5083                  | 1157.5023                 | 5                      | LICTTAVPWNASWSNK  | [Hex]5[HexNAc]4               |
| 3+ | 1206.1929                  | 1206.1883                 | 4                      | LICTTAVPWNASWSNK  | [Hex]5[HexNAc]4[Fuc]1         |
| 3+ | 1303.2219                  | 1303.2201                 | 1                      | LICTTAVPWNASWSNK  | [Hex]5[HexNAc]4[Fuc]1[NeuAc]1 |
| 3+ | 1400.2564                  | 1400.2519                 | 3                      | LICTTAVPWNASWSNK  | [Hex]5[HexNAc]4[Fuc]1[NeuAc]2 |
| 3+ | 1351.5588                  | 1351.5660                 | 5                      | LICTTAVPWNASWSNK  | [Hex]5[HexNAc]4[NeuAc]2       |
| 3+ | 1273.8799                  | 1273.8814                 | 1                      | LICTTAVPWNASWSNK  | [Hex]5[HexNAc]5[Fuc]1         |
| 3+ | 1143.8321                  | 1143.8268                 | 5                      | LICTTAVPWNASWSNK  | [Hex]6[HexNAc]3               |
| 3+ | 1327.9034                  | 1327.8990                 | 3                      | LICTTAVPWNASWSNK  | [Hex]6[HexNAc]5[Fuc]1         |
| 3+ | 1130.1546                  | 1130.1513                 | 3                      | LICTTAVPWNASWSNK  | [Hex]7[HexNAc]2               |
| 3+ | 1197.8458                  | 1197.8444                 | 1                      | LICTTAVPWNASWSNK  | [Hex]7[HexNAc]3               |
| 3+ | 1517.2926                  | 1517.3029                 | 7                      | LICTTAVPWNASWSNK  | [Hex]7[HexNAc]7[Fuc]1         |
|    |                            |                           |                        |                   |                               |
| 4+ | 1192.4870                  | 1192.4936                 | 6                      | LICTTAVPWNASWSNK  | [Hex]6[HexNAc]6[Fuc]1[NeuAc]2 |
|    |                            |                           |                        |                   |                               |
| 3+ | 1098.1589                  | 1098.1531                 | 5                      | LICTTAVPWNASWSNK* | [Hex]3[HexNAc]4[Fuc]1         |
| 3+ | 1165.8480                  | 1165.8462                 | 2                      | LICTTAVPWNASWSNK* | [Hex]3[HexNAc]5[Fuc]1         |
| 3+ | 1152.1768                  | 1152.1707                 | 5                      | LICTTAVPWNASWSNK* | [Hex]4[HexNAc]4[Fuc]1         |
| 3+ | 1219.8695                  | 1219.8638                 | 5                      | LICTTAVPWNASWSNK* | [Hex]4[HexNAc]5[Fuc]1         |
| 3+ | 1316.8992                  | 1316.8956                 | 3                      | LICTTAVPWNASWSNK* | [Hex]4[HexNAc]5[Fuc]1[NeuAc]1 |
| 3+ | 1206.1907                  | 1206.1883                 | 2                      | LICTTAVPWNASWSNK* | [Hex]5[HexNAc]4[Fuc]1         |
| 3+ | 1303.2239                  | 1303.2201                 | 3                      | LICTTAVPWNASWSNK* | [Hex]5[HexNAc]4[Fuc]1[NeuAc]1 |
| 3+ | 1400.2543                  | 1400.2519                 | 2                      | LICTTAVPWNASWSNK* | [Hex]5[HexNAc]4[Fuc]1[NeuAc]2 |
| 3+ | 1273.8856                  | 1273.8814                 | 3                      | LICTTAVPWNASWSNK* | [Hex]5[HexNAc]5[Fuc]1         |
| 3+ | 1370.9168                  | 1370.9132                 | 3                      | LICTTAVPWNASWSNK* | [Hex]5[HexNAc]5[Fuc]1[NeuAc]1 |
| 3+ | 1467.9418                  | 1467.9450                 | 2                      | LICTTAVPWNASWSNK* | [Hex]5[HexNAc]5[Fuc]1[NeuAc]2 |
| 3+ | 1327.9039                  | 1327.8990                 | 4                      | LICTTAVPWNASWSNK* | [Hex]6[HexNAc]5[Fuc]1         |
| 3+ | 1424.9344                  | 1424.9308                 | 3                      | LICTTAVPWNASWSNK* | [Hex]6[HexNAc]5[Fuc]1[NeuAc]1 |
| 3+ | 1521.9696                  | 1521.9626                 | 5                      | LICTTAVPWNASWSNK* | [Hex]6[HexNAc]5[Fuc]1[NeuAc]2 |
| 3+ | 1395.6015                  | 1395.5922                 | 7                      | LICTTAVPWNASWSNK* | [Hex]6[HexNAc]6[Fuc]1         |
| 3+ | 1492.6286                  | 1492.6240                 | 3                      | LICTTAVPWNASWSNK* | [Hex]6[HexNAc]6[Fuc]1[NeuAc]1 |
| 3+ | 1492.6286                  | 1492.6240                 | 3                      | LICTTAVPWNASWSNK* | [Hex]6[HexNAc]6[Fuc]1[NeuAc]1 |
| 3+ | 1449.6133                  | 1449.6098                 | 2                      | LICTTAVPWNASWSNK* | [Hex]7[HexNAc]6[Fuc]1         |
| 3+ | 1546.6489                  | 1546.6416                 | 5                      | LICTTAVPWNASWSNK* | [Hex]7[HexNAc]6[Fuc]1[NeuAc]1 |
| 3+ | 1643.6740                  | 1643.6734                 | 0.4                    | LICTTAVPWNASWSNK* | [Hex]7[HexNAc]6[Fuc]1[NeuAc]2 |
| 3+ | 1571.3183                  | 1571.3205                 | 1                      | LICTTAVPWNASWSNK* | [Hex]8[HexNAc]7[Fuc]1         |
| 3+ | 1668.3434                  | 1668.3523                 | 5                      | LICTTAVPWNASWSNK* | [Hex]8[HexNAc]7[Fuc]1[NeuAc]1 |
|    |                            |                           |                        |                   |                               |
| 4+ | 1324.2960                  | 1324.2899                 | 5                      | LICTTAVPWNASWSNK* | [Hex]8[HexNAc]7[Fuc]1[NeuAc]2 |
| 4+ | 1397.0607                  | 1397.0637                 | 2                      | LICTTAVPWNASWSNK* | [Hex]8[HexNAc]7[Fuc]1[NeuAc]3 |
|    |                            |                           |                        |                   |                               |
| 2+ | 924.4574                   | 924.4590                  | 2                      | LICTTAVPWNASWSNK  | non-glycosylated              |
|    |                            |                           |                        |                   |                               |
| 2+ | 949.9160                   | 949.9109                  | 5                      | IWNNMTWMEWER      | [HexNAc]                      |
| 2+ | 1051.4554                  | 1051.4534                 | 2                      | IWNNMTWMEWER      | [HexNAc]2                     |
| 2+ | 1132.4822                  | 1132.4797                 | 2                      | IWNNMTWMEWER      | [Hex]1[HexNAc]2               |
| 2+ | 1213.5105                  | 1213.5062                 | 4                      | IWNNMTWMEWER      | [Hex]2[HexNAc]2               |
| 2+ | 1294.5345                  | 1294.5326                 | 1                      | IWNNMTWMEWER      | [Hex]3[HexNAc]2               |
| 2+ | 1469.1127                  | 1469.1012                 | 8                      | IWNNMTWMEWER      | [Hex]3[HexNAc]3[Fuc]1         |
| 2+ | 1375.5612                  | 1375.5590                 | 2                      | IWNNMTWMEWER      | [Hex]4[HexNAc]2               |
| 3+ | 1033.7540                  | 1033.7542                 | 0.2                    | IWNNMTWMEWER      | [Hex]4[HexNAc]3[Fuc]1         |
| 3+ | 1101.4527                  | 1101.4473                 | 5                      | IWNNMTWMEWER      | [Hex]4[HexNAc]4[Fuc]1         |
| 3+ | 1198.4738                  | 1198.4791                 | 4                      | IWNNMTWMEWER      | [Hex]4[HexNAc]4[Fuc]1[NeuAc]1 |
| 3+ | 1169.1484                  | 1169.1404                 | 7                      | IWNNMTWMEWER      | [Hex]4[HexNAc]5[Fuc]1         |
| 2+ | 1456.5886                  | 1456.5854                 | 2                      | IWNNMTWMEWER      | [Hex]5[HexNAc]2               |
| 3+ | 1039.0899                  | 1039.0858                 | 4                      | IWNNMTWMEWER      | [Hex]5[HexNAc]3               |
| 3+ | 1087.7757                  | 1087.7718                 | 4                      | IWNNMTWMEWER      | [Hex]5[HexNAc]3[Fuc]1         |

| CS                            | Experimental<br><i>m/z</i> | Theoretical<br><i>m/z</i> | Mass<br>Error<br>(ppm) | Peptide Sequence       | Glycan                        |
|-------------------------------|----------------------------|---------------------------|------------------------|------------------------|-------------------------------|
| 3+                            | 1106.7755                  | 1106.7789                 | 3                      | IWNNMTWMEWER           | [Hex]5[HexNAc]4               |
| 3+                            | 1155.4698                  | 1155.4649                 | 4                      | IWNNMTWMEWER           | [Hex]5[HexNAc]4[Fuc]1         |
| 3+                            | 1252.5008                  | 1252.4967                 | 3                      | IWNNMTWMEWER           | [Hex]5[HexNAc]4[Fuc]1[NeuAc]1 |
| 3+                            | 1349.5198                  | 1349.5285                 | 6                      | IWNNMTWMEWER           | [Hex]5[HexNAc]4[Fuc]1[NeuAc]2 |
| 3+                            | 1203.8140                  | 1203.8107                 | 3                      | IWNNMTWMEWER           | [Hex]5[HexNAc]4[NeuAc]1       |
| 3+                            | 1223.1690                  | 1223.1580                 | 9                      | IWNNMTWMEWER           | [Hex]5[HexNAc]5[Fuc]1         |
| 3+                            | 1320.1915                  | 1320.1898                 | 1                      | IWNNMTWMEWER           | [Hex]5[HexNAc]5[Fuc]1[NeuAc]1 |
| 2+                            | 1537.6135                  | 1537.6118                 | 1                      | IWNNMTWMEWER           | [Hex]6[HexNAc]2               |
| 3+                            | 1093.0997                  | 1093.1034                 | 3                      | IWNNMTWMEWER           | [Hex]6[HexNAc]3               |
| 3+                            | 1277.1778                  | 1277.1756                 | 2                      | IWNNMTWMEWER           | [Hex]6[HexNAc]5[Fuc]1         |
| 3+                            | 1374.2070                  | 1374.2074                 | 0.3                    | IWNNMTWMEWER           | [Hex]6[HexNAc]5[Fuc]1[NeuAc]1 |
| 3+                            | 1471.2423                  | 1471.2392                 | 2                      | IWNNMTWMEWER           | [Hex]6[HexNAc]5[Fuc]1[NeuAc]2 |
| 2+                            | 1618.6378                  | 1618.6382                 | 0.2                    | IWNNMTWMEWER           | [Hex]7[HexNAc]2               |
| 3+                            | 1147.1219                  | 1147.1210                 | 1                      | IWNNMTWMEWER           | [Hex]7[HexNAc]3               |
| 3+                            | 1495.9205                  | 1495.9182                 | 2                      | IWNNMTWMEWER           | [Hex]7[HexNAc]6[Fuc]1[NeuAc]1 |
| 2+                            | 1699.6647                  | 1699.6646                 | 0.1                    | IWNNMTWMEWER           | [Hex]8[HexNAc]2               |
| 2+                            | 1780.6941                  | 1780.6910                 | 2                      | IWNNMTWMEWER           | [Hex]9[HexNAc]2               |
| 2+                            | 1861.7199                  | 1861.7174                 | 1                      | IWNNMTWMEWER           | [Hex]10[HexNAc]2              |
| 3+                            | 1295.5007                  | 1295.4983                 | 2                      | IWNNMTWMEWER           | [Hex]11[HexNAc]2              |
|                               |                            |                           |                        |                        |                               |
| 2+                            | 848.3767                   | 848.3740                  | 3                      | IWNNMTWMEWER           | non-glycosylated              |
|                               |                            |                           |                        |                        |                               |
| 2+                            | 1439.1507                  | 1439.1589                 | 6                      | EIDNYTSEIYTLIEESQNQQEK | [HexNAc]                      |
| 3+                            | 1189.5247                  | 1189.5228                 | 2                      | EIDNYTSEIYTLIEESQNQQEK | [Hex]3[HexNAc]2               |
| 3+                            | 1373.6003                  | 1373.5950                 | 4                      | EIDNYTSEIYTLIEESQNQQEK | [Hex]3[HexNAc]4[Fuc]1         |
| 3+                            | 1243.5422                  | 1243.5404                 | 1                      | EIDNYTSEIYTLIEESQNQQEK | [Hex]4[HexNAc]2               |
| 3+                            | 1297.5663                  | 1297.5580                 | 6                      | EIDNYTSEIYTLIEESQNQQEK | [Hex]5[HexNAc]2               |
| 3+                            | 1578.6660                  | 1578.6620                 | 3                      | EIDNYTSEIYTLIEESQNQQEK | [Hex]5[HexNAc]4[Fuc]1[NeuAc]1 |
| 3+                            | 1351.5829                  | 1351.5756                 | 5                      | EIDNYTSEIYTLIEESQNQQEK | [Hex]6[HexNAc]2               |
| 3+                            | 1405.5995                  | 1405.5932                 | 4                      | EIDNYTSEIYTLIEESQNQQEK | [Hex]7[HexNAc]2               |
| 3+                            | 1459.6178                  | 1459.6108                 | 5                      | EIDNYTSEIYTLIEESQNQQEK | [Hex]8[HexNAc]2               |
| 3+                            | 1513.6392                  | 1513.6284                 | 7                      | EIDNYTSEIYTLIEESQNQQEK | [Hex]9[HexNAc]2               |
| 3+                            | 1567.6565                  | 1567.6460                 | 7                      | EIDNYTSEIYTLIEESQNQQEK | [Hex]10[HexNAc]2              |
|                               |                            |                           |                        |                        |                               |
| 4+                            | 1081.2198                  | 1081.2179                 | 2                      | EIDNYTSEIYTLIEESQNQQEK | [Hex]3[HexNAc]5[Fuc]1         |
| 4+                            | 1131.9861                  | 1131.9878                 | 2                      | EIDNYTSEIYTLIEESQNQQEK | [Hex]3[HexNAc]6[Fuc]1         |
| 4+                            | 1096.9658                  | 1096.9640                 | 2                      | EIDNYTSEIYTLIEESQNQQEK | [Hex]5[HexNAc]3 [NeuAc]1      |
| 4+                            | 1111.4843                  | 1111.4745                 | 9                      | EIDNYTSEIYTLIEESQNQQEK | [Hex]5[HexNAc]4[Fuc]1         |
| 4+                            | 1257.0369                  | 1257.0222                 | 12                     | EIDNYTSEIYTLIEESQNQQEK | [Hex]5[HexNAc]4[Fuc]1[NeuAc]2 |
| 4+                            | 1162.2451                  | 1162.2443                 | 1                      | EIDNYTSEIYTLIEESQNQQEK | [Hex]5[HexNAc]5[Fuc]1         |
| 4+                            | 1137.4799                  | 1137.4772                 | 2                      | EIDNYTSEIYTLIEESQNQQEK | [Hex]6[HexNAc]3[NeuAc]1       |
| 4+                            | 1202.7642                  | 1202.7575                 | 6                      | EIDNYTSEIYTLIEESQNQQEK | [Hex]6[HexNAc]5[Fuc]1         |
| 4+                            | 1275.5401                  | 1275.5314                 | 7                      | EIDNYTSEIYTLIEESQNQQEK | [Hex]6[HexNAc]5[Fuc]1[NeuAc]1 |
| 4+                            | 1348.3083                  | 1348.3052                 | 2                      | EIDNYTSEIYTLIEESQNQQEK | [Hex]6[HexNAc]5[Fuc]1[NeuAc]2 |
| 4+                            | 1294.0351                  | 1294.0406                 | 4                      | EIDNYTSEIYTLIEESQNQQEK | [Hex]7[HexNAc]6[Fuc]1         |
| 4+                            | 1366.8064                  | 1366.8144                 | 6                      | EIDNYTSEIYTLIEESQNQQEK | [Hex]7[HexNAc]6[Fuc]1[NeuAc]1 |
| 4+                            | 1439.5793                  | 1439.5883                 | 6                      | EIDNYTSEIYTLIEESQNQQEK | [Hex]7[HexNAc]6[Fuc]1[NeuAc]2 |
| 4+                            | 1512.3607                  | 1512.3621                 | 1                      | EIDNYTSEIYTLIEESQNQQEK | [Hex]7[HexNAc]6[Fuc]1[NeuAc]3 |
| 4+                            | 1603.6408                  | 1603.6452                 | 3                      | EIDNYTSEIYTLIEESQNQQEK | [Hex]8[HexNAc]7[Fuc]1[NeuAc]3 |
|                               |                            |                           |                        |                        |                               |
| 2+                            | 1337.6194                  | 1337.6219                 | 2                      | EIDNYTSEIYTLIEESQNQQEK | non-glycosylated              |
|                               |                            |                           |                        |                        |                               |
| <b>O-linked glycopeptides</b> |                            |                           |                        |                        |                               |
| 2+                            | 614.3465                   | 614.3452                  | 2                      | IEPLGVAPTK             | [HexNAc]1                     |
| 2+                            | 695.3700                   | 695.3716                  | 2                      | IEPLGVAPTK             | [Hex]1[HexNAc]1               |
| 2+                            | 840.9171                   | 840.9193                  | 3                      | IEPLGVAPTK             | [Hex]1[HexNAc]1[NeuAc]1       |

| CS | Experimental<br><i>m/z</i> | Theoretical<br><i>m/z</i> | Mass<br>Error<br>(ppm) | Peptide Sequence | Glycan                  |
|----|----------------------------|---------------------------|------------------------|------------------|-------------------------|
| 2+ | 986.4671                   | 986.4670                  | 0.1                    | IEPLGVAPTK       | [Hex]1[HexNAc]1[NeuAc]2 |
|    |                            |                           |                        |                  |                         |
| 2+ | 512.8046                   | 512.8055                  | 2                      | IEPLGVAPTK       | non-glycosylated        |
|    |                            |                           |                        |                  |                         |
| 3+ | 684.9963                   | 684.9909                  | 7.9                    | LICTTAVPWDASWSDK | [HexNAc]1               |
| 3+ | 836.0435                   | <i>836.0403</i>           | 3.8                    | LICTTAVPWDASWSDK | [Hex]1[HexNAc]1[NeuAc]1 |
| 3+ | 933.0764                   | 933.0721                  | 4.6                    | LICTTAVPWDASWSDK | [Hex]1[HexNAc]1[NeuAc]2 |
|    |                            |                           |                        |                  |                         |
| 2+ | 925.4439                   | 925.4430                  | 1                      | LICTTAVPWDASWSDK | non -glycosylated       |

CS denotes charge state

Glycopeptides with asterisks (\*) were obtained from Endo-H reaction

**Table S2. N- and O-linked glycopeptide compositions of membrane-anchored Env(-)Δ808**

| CS | Experimental m/z | Theoretical m/z | Mass Error (ppm) | Peptide Sequence                       | Glycan                        |
|----|------------------|-----------------|------------------|----------------------------------------|-------------------------------|
| 3+ | 1285.9079        | 1285.8889       | 15               | ACVPTDPNPQEVVLENVTEHF                  | [Hex]4[HexNAc]4               |
| 3+ | 1469.9729        | 1469.9611       | 8                | ACVPTDPNPQEVVLENVTEHF                  | [Hex]4[HexNAc]6[Fuc]1         |
| 3+ | 1339.9243        | 1339.9065       | 13               | ACVPTDPNPQEVVLENVTEHF                  | [Hex]5[HexNAc]4               |
| 3+ | 1582.6445        | 1582.6435       | 1                | ACVPTDPNPQEVVLENVTEHF                  | [Hex]12[HexNAc]2              |
| 4+ | 1143.2482        | 1143.2359       | 11               | ACVPTDPNPQEVVLENVTEHF                  | [Hex]5[HexNAc]6[Fuc]1         |
| 3+ | 1037.4884        | 1037.4801       | 8                | ATHACVPTDPNPQEVVLENVTEHF               | [HexNAc]2                     |
| 3+ | 1091.5089        | 1091.4977       | 10               | ATHACVPTDPNPQEVVLENVTEHF               | [Hex]1[HexNAc]2               |
| 3+ | 1267.2338        | 1267.2261       | 6                | ATHACVPTDPNPQEVVLENVTEHF               | [Hex]3[HexNAc]3               |
| 4+ | 1171.0404        | 1171.0390       | 1                | AYDTEVHNVWATHACVPTDPNPQEVVLENVTEHFNMWK | [HexNAc]                      |
| 4+ | 1481.4077        | 1481.4040       | 2                | AYDTEVHNVWATHACVPTDPNPQEVVLENVTEHFNMWK | [Hex]3[HexNAc]4[Fuc]1         |
| 4+ | 1532.1749        | 1532.1739       | 1                | AYDTEVHNVWATHACVPTDPNPQEVVLENVTEHFNMWK | [Hex]3[HexNAc]5[Fuc]1         |
| 4+ | 1572.6962        | 1572.6871       | 6                | AYDTEVHNVWATHACVPTDPNPQEVVLENVTEHFNMWK | [Hex]4[HexNAc]5[Fuc]1         |
| 4+ | 1424.3734        | 1424.3763       | 2                | AYDTEVHNVWATHACVPTDPNPQEVVLENVTEHFNMWK | [Hex]5[HexNAc]2               |
| 4+ | 1562.4144        | 1562.4304       | 10               | AYDTEVHNVWATHACVPTDPNPQEVVLENVTEHFNMWK | [Hex]5[HexNAc]4[Fuc]1         |
| 4+ | 1464.8932        | 1464.8895       | 3                | AYDTEVHNVWATHACVPTDPNPQEVVLENVTEHFNMWK | [Hex]6[HexNAc]2               |
| 4+ | 1505.4063        | 1505.4027       | 2                | AYDTEVHNVWATHACVPTDPNPQEVVLENVTEHFNMWK | [Hex]7[HexNAc]2               |
| 4+ | 1545.9205        | 1545.9159       | 3                | AYDTEVHNVWATHACVPTDPNPQEVVLENVTEHFNMWK | [Hex]8[HexNAc]2               |
| 4+ | 1626.9428        | 1626.9423       | 0.3              | AYDTEVHNVWATHACVPTDPNPQEVVLENVTEHFNMWK | [Hex]10[HexNAc]2              |
| 4+ | 1667.4642        | 1667.4555       | 5                | AYDTEVHNVWATHACVPTDPNPQEVVLENVTEHFNMWK | [Hex]11[HexNAc]2              |
| 5+ | 1042.4714        | 1042.4708       | 1                | AYDTEVHNVWATHACVPTDPNPQEVVLENVTEHFNMWK | [Hex]2[HexNAc]2               |
| 5+ | 1074.8808        | 1074.8813       | 0.5              | AYDTEVHNVWATHACVPTDPNPQEVVLENVTEHFNMWK | [Hex]3[HexNAc]2               |
| 5+ | 1144.7129        | 1144.7088       | 4                | AYDTEVHNVWATHACVPTDPNPQEVVLENVTEHFNMWK | [Hex]3[HexNAc]3[Fuc]1         |
| 5+ | 1156.1176        | 1156.1131       | 4                | AYDTEVHNVWATHACVPTDPNPQEVVLENVTEHFNMWK | [Hex]3[HexNAc]4               |
| 5+ | 1266.5568        | 1266.5564       | 0.3              | AYDTEVHNVWATHACVPTDPNPQEVVLENVTEHFNMWK | [Hex]3[HexNAc]6[Fuc]1         |
| 5+ | 1107.2841        | 1107.2919       | 7                | AYDTEVHNVWATHACVPTDPNPQEVVLENVTEHFNMWK | [Hex]4[HexNAc]2               |
| 5+ | 1217.7315        | 1217.7352       | 3                | AYDTEVHNVWATHACVPTDPNPQEVVLENVTEHFNMWK | [Hex]4[HexNAc]4[Fuc]1         |
| 5+ | 1275.9477        | 1275.9543       | 5                | AYDTEVHNVWATHACVPTDPNPQEVVLENVTEHFNMWK | [Hex]4[HexNAc]4[Fuc]1[NeuAc]1 |
| 5+ | 1229.1367        | 1229.1395       | 2                | AYDTEVHNVWATHACVPTDPNPQEVVLENVTEHFNMWK | [Hex]4[HexNAc]5               |
| 5+ | 1316.5868        | 1316.5702       | 13               | AYDTEVHNVWATHACVPTDPNPQEVVLENVTEHFNMWK | [Hex]4[HexNAc]5[Fuc]1[NeuAc]1 |
| 5+ | 1298.9619        | 1298.9670       | 4                | AYDTEVHNVWATHACVPTDPNPQEVVLENVTEHFNMWK | [Hex]4[HexNAc]6[Fuc]1         |
| 5+ | 1357.2002        | 1357.1861       | 10               | AYDTEVHNVWATHACVPTDPNPQEVVLENVTEHFNMWK | [Hex]4[HexNAc]6[Fuc]1[NeuAc]1 |
| 5+ | 1279.1583        | 1279.1533       | 4                | AYDTEVHNVWATHACVPTDPNPQEVVLENVTEHFNMWK | [Hex]5[HexNAc]4[NeuAc]1       |
| 5+ | 1308.3658        | 1308.3649       | 1                | AYDTEVHNVWATHACVPTDPNPQEVVLENVTEHFNMWK | [Hex]5[HexNAc]4[Fuc]1[NeuAc]1 |
| 5+ | 1366.5833        | 1366.5840       | 1                | AYDTEVHNVWATHACVPTDPNPQEVVLENVTEHFNMWK | [Hex]5[HexNAc]4[Fuc]1[NeuAc]2 |
| 5+ | 1290.7494        | 1290.7617       | 10               | AYDTEVHNVWATHACVPTDPNPQEVVLENVTEHFNMWK | [Hex]5[HexNAc]5[Fuc]1         |
| 5+ | 1348.9699        | 1348.9808       | 8                | AYDTEVHNVWATHACVPTDPNPQEVVLENVTEHFNMWK | [Hex]5[HexNAc]5[Fuc]1[NeuAc]1 |
| 5+ | 1407.1949        | 1407.1998       | 3                | AYDTEVHNVWATHACVPTDPNPQEVVLENVTEHFNMWK | [Hex]5[HexNAc]5[Fuc]1[NeuAc]2 |
| 5+ | 1389.5934        | 1389.5966       | 2                | AYDTEVHNVWATHACVPTDPNPQEVVLENVTEHFNMWK | [Hex]5[HexNAc]6[Fuc]1[NeuAc]1 |
| 5+ | 1520.8370        | 1520.8422       | 3                | AYDTEVHNVWATHACVPTDPNPQEVVLENVTEHFNMWK | [Hex]6[HexNAc]7[Fuc]1[NeuAc]2 |
| 5+ | 1512.6559        | 1512.6368       | 13               | AYDTEVHNVWATHACVPTDPNPQEVVLENVTEHFNMWK | [Hex]7[HexNAc]6[Fuc]1[NeuAc]2 |
| 5+ | 1570.8678        | 1570.8559       | 8                | AYDTEVHNVWATHACVPTDPNPQEVVLENVTEHFNMWK | [Hex]7[HexNAc]6[Fuc]1[NeuAc]3 |
| 5+ | 1269.3434        | 1269.3447       | 1                | AYDTEVHNVWATHACVPTDPNPQEVVLENVTEHFNMWK | [Hex]9[HexNAc]2               |
| 3+ | 1429.8752        | 1429.8791       | 3                | DVNATNTTNDSEGTMER                      | [Hex]10[HexNAc]4              |

| CS | Experimental<br><i>m/z</i> | Theoretical<br><i>m/z</i> | Mass<br>Error<br>(ppm) | Peptide Sequence   | Glycan                |
|----|----------------------------|---------------------------|------------------------|--------------------|-----------------------|
| 3+ | 1483.9015                  | 1483.8967                 | 3                      | DVNATNTTNDSEGTMER  | [Hex]11[HexNAc]4      |
| 3+ | 1537.9169                  | 1537.9143                 | 2                      | DVNATNTTNDSEGTMER  | [Hex]12[HexNAc]4      |
| 3+ | 1699.9754                  | 1699.9671                 | 5                      | DVNATNTTNDSEGTMER  | [Hex]15[HexNAc]4      |
| 3+ | 1808.0116                  | 1808.0023                 | 5                      | DVNATNTTNDSEGTMER  | [Hex]17[HexNAc]4      |
| 3+ | 1862.0225                  | 1862.0199                 | 1                      | DVNATNTTNDSEGTMER  | [Hex]18[HexNAc]4      |
| 3+ | 1916.0455                  | 1916.0375                 | 4                      | DVNATNTTNDSEGTMER  | [Hex]19[HexNAc]4      |
| 3+ | 1970.0629                  | 1970.0551                 | 4                      | DVNATNTTNDSEGTMER  | [Hex]20[HexNAc]4      |
|    |                            |                           |                        |                    |                       |
| 4+ | 1194.1990                  | 1194.2007                 | 1                      | DVNATNTTNDSEGTMER  | [Hex]13[HexNAc]4      |
| 4+ | 1234.7185                  | 1234.7140                 | 4                      | DVNATNTTNDSEGTMER  | [Hex]14[HexNAc]4      |
| 4+ | 1315.7463                  | 1315.7404                 | 4                      | DVNATNTTNDSEGTMER  | [Hex]16[HexNAc]4      |
|    |                            |                           |                        |                    |                       |
| 2+ | 1029.4310                  | 1029.4291                 | 2                      | DVNATNTTNDSEGTMER  | [HexNAc]              |
| 2+ | 1102.4663                  | 1102.4608                 | 5                      | DVNATNTTNDSEGTMER  | [HexNAc][Fuc]         |
| 2+ | 1130.9670                  | 1130.9716                 | 4                      | DVNATNTTNDSEGTMER  | [HexNAc]2             |
|    |                            |                           |                        |                    |                       |
| 2+ | 1212.0036                  | 1211.9979                 | 5                      | DVNATNTTNDSEGTMER  | [Hex]1[HexNAc]2       |
| 2+ | 1475.5954                  | 1475.5905                 | 3                      | DVNATNTTNDSEGTMER  | [Hex]3[HexNAc]3       |
| 2+ | 1548.6225                  | 1548.6194                 | 2                      | DVNATNTTNDSEGTMER  | [Hex]3[HexNAc]3[Fuc]1 |
| 2+ | 1650.1605                  | 1650.1591                 | 1                      | DVNATNTTNDSEGTMER  | [Hex]3[HexNAc]4[Fuc]1 |
| 2+ | 1751.6931                  | 1751.6988                 | 3                      | DVNATNTTNDSEGTMER  | [Hex]3[HexNAc]5[Fuc]1 |
| 2+ | 1455.0802                  | 1455.0772                 | 2                      | DVNATNTTNDSEGTMER  | [Hex]4[HexNAc]2       |
| 2+ | 1556.6315                  | 1556.6169                 | 9                      | DVNATNTTNDSEGTMER  | [Hex]4[HexNAc]3       |
| 2+ | 1536.1089                  | 1536.1036                 | 3                      | DVNATNTTNDSEGTMER  | [Hex]5[HexNAc]2       |
| 2+ | 1617.1353                  | 1617.1300                 | 3                      | DVNATNTTNDSEGTMER  | [Hex]6[HexNAc]2       |
| 2+ | 1698.1515                  | 1698.1564                 | 3                      | DVNATNTTNDSEGTMER  | [Hex]7[HexNAc]2       |
| 2+ | 1779.1880                  | 1779.1828                 | 3                      | DVNATNTTNDSEGTMER  | [Hex]8[HexNAc]2       |
| 2+ | 1860.2132                  | 1860.2092                 | 2                      | DVNATNTTNDSEGTMER  | [Hex]9[HexNAc]2       |
|    |                            |                           |                        |                    |                       |
| 3+ | 862.3472                   | 862.3520                  | 6                      | DVNATNTTNDSEGTMER  | [Hex]2[HexNAc]2       |
| 3+ | 916.3745                   | 916.3696                  | 5                      | DVNATNTTNDSEGTMER  | [Hex]3[HexNAc]2       |
| 3+ | 1235.8362                  | 1235.8281                 | 7                      | DVNATNTTNDSEGTMER  | [Hex]3[HexNAc]6[Fuc]1 |
| 3+ | 1092.1098                  | 1092.0979                 | 11                     | DVNATNTTNDSEGTMER  | [Hex]5[HexNAc]3       |
| 3+ | 1294.4959                  | 1294.4928                 | 2                      | DVNATNTTNDSEGTMER  | [Hex]10[HexNAc]2      |
|    |                            |                           |                        |                    |                       |
| 3+ | 1289.8559                  | 1289.8457                 | 8                      | DVNATNTTNDSEGTMER* | [Hex]4[HexNAc]6[Fuc]1 |
| 3+ | 1397.8839                  | 1397.8809                 | 2                      | DVNATNTTNDSEGTMER* | [Hex]6[HexNAc]6[Fuc]1 |
|    |                            |                           |                        |                    |                       |
| 2+ | 872.3141                   | 872.3110                  | 4                      | NCSF               | [Hex]5[HexNAc]2       |
| 2+ | 953.3373                   | 953.3374                  | 0.1                    | NCSF               | [Hex]6[HexNAc]2       |
| 2+ | 1034.3667                  | 1034.3638                 | 3                      | NCSF               | [Hex]7[HexNAc]2       |
| 2+ | 1196.4209                  | 1196.4166                 | 4                      | NCSF               | [Hex]9[HexNAc]2       |
| 2+ | 1115.3930                  | 1115.3902                 | 3                      | NCSF               | [Hex]8[HexNAc]2       |
| 2+ | 1277.4476                  | 1277.4430                 | 4                      | NCSF               | [Hex]10[HexNAc]2      |
|    |                            |                           |                        |                    |                       |
| 1+ | 527.1926                   | 527.1918                  | 1                      | NCSF               | non-glycosylated      |
|    |                            |                           |                        |                    |                       |
| 2+ | 848.8930                   | 848.8910                  | 2                      | NITTSIR            | [Hex]3[HexNAc]2       |
| 2+ | 1051.9756                  | 1051.9703                 | 5                      | NITTSIR            | [Hex]3[HexNAc]4       |
| 2+ | 1125.0024                  | 1124.9993                 | 3                      | NITTSIR            | [Hex]3[HexNAc]4[Fuc]1 |



| CS | Experimental<br><i>m/z</i> | Theoretical<br><i>m/z</i> | Mass<br>Error<br>(ppm) | Peptide Sequence | Glycan                 |
|----|----------------------------|---------------------------|------------------------|------------------|------------------------|
| 2+ | 1328.0789                  | 1328.0787                 | 0.2                    | NITTSIR          | [Hex]3[HexNAc]6[Fuc]1  |
| 2+ | 929.9208                   | 929.9174                  | 4                      | NITTSIR          | [Hex]4[HexNAc]2        |
| 2+ | 1010.9451                  | 1010.9438                 | 1                      | NITTSIR          | [Hex]5[HexNAc]2        |
| 2+ | 1091.9651                  | 1091.9702                 | 5                      | NITTSIR          | [Hex]6[HexNAc]2        |
| 2+ | 1173.0061                  | 1172.9966                 | 8                      | NITTSIR          | [Hex]7[HexNAc]2        |
| 2+ | 1254.0362                  | 1254.023                  | 11                     | NITTSIR          | [Hex]8[HexNAc]2        |
| 2+ | 1335.0575                  | 1335.0494                 | 6                      | NITTSIR          | [Hex]9[HexNAc]2        |
| 2+ | 1416.0834                  | 1416.0758                 | 5                      | NITTSIR          | [Hex]10[HexNAc]2       |
| 2+ | 1497.1144                  | 1497.1023                 | 8                      | NITTSIR          | [Hex]11[HexNAc]2       |
|    |                            |                           |                        |                  |                        |
| 2+ | 803.9111                   | 803.915                   | 5                      | NITTSIRDEVQK     | [HexNAc]               |
|    |                            |                           |                        |                  |                        |
| 3+ | 833.7190                   | 833.7200                  | 1                      | NITTSIRDEVQK     | [Hex]3[HexNAc]3        |
| 3+ | 882.4025                   | 882.4060                  | 4                      | NITTSIRDEVQK     | [Hex]3[HexNAc]3[Fuc]1  |
| 3+ | 1017.7965                  | 1017.7923                 | 4                      | NITTSIRDEVQK     | [Hex]3[HexNAc]5[Fuc]1  |
| 3+ | 887.7468                   | 887.7376                  | 10                     | NITTSIRDEVQK     | [Hex]4[HexNAc]3        |
| 3+ | 1004.1264                  | 1004.1167                 | 10                     | NITTSIRDEVQK     | [Hex]4[HexNAc]4 [Fuc]1 |
| 3+ | 941.7657                   | 941.7552                  | 11                     | NITTSIRDEVQK     | [Hex]5[HexNAc]3        |
|    |                            |                           |                        |                  |                        |
| 2+ | 702.3785                   | 702.3781                  | 0.6                    | NITTSIRDEVQK     | non-glycosylated       |
|    |                            |                           |                        |                  |                        |
| 3+ | 925.0604                   | 925.0582                  | 2                      | NCSFNITTSIR      | [Hex]4[HexNAc]4        |
| 3+ | 979.0792                   | 979.0758                  | 3                      | NCSFNITTSIR      | [Hex]5[HexNAc]4        |
| 3+ | 1033.0928                  | 1033.0934                 | 1                      | NCSFNITTSIR      | [Hex]6[HexNAc]4        |
| 3+ | 1087.1135                  | 1087.111                  | 2                      | NCSFNITTSIR      | [Hex]7[HexNAc]4        |
| 3+ | 1141.1343                  | 1141.1286                 | 5                      | NCSFNITTSIR      | [Hex]8[HexNAc]4        |
| 3+ | 1195.1444                  | 1195.1463                 | 2                      | NCSFNITTSIR      | [Hex]9[HexNAc]4        |
| 3+ | 1249.1684                  | 1249.1639                 | 4                      | NCSFNITTSIR      | [Hex]10[HexNAc]4       |
| 3+ | 1500.9205                  | 1500.9292                 | 6                      | NCSFNITTSIR      | [Hex]10[HexNAc]7[Fuc]1 |
| 3+ | 1568.6379                  | 1568.6223                 | 10                     | NCSFNITTSIR      | [Hex]10[HexNAc]8[Fuc]1 |
| 3+ | 1303.1856                  | 1303.1815                 | 3                      | NCSFNITTSIR      | [Hex]11[HexNAc]4       |
| 3+ | 1487.2627                  | 1487.2537                 | 6                      | NCSFNITTSIR      | [Hex]11[HexNAc]6[Fuc]1 |
| 3+ | 1554.952                   | 1554.9468                 | 3.3                    | NCSFNITTSIR      | [Hex]11[HexNAc]7[Fuc]1 |
| 3+ | 1357.1979                  | 1357.1991                 | 1                      | NCSFNITTSIR      | [Hex]12[HexNAc]4       |
| 3+ | 1465.2381                  | 1465.2343                 | 3                      | NCSFNITTSIR      | [Hex]14[HexNAc]4       |
| 3+ | 1519.2559                  | 1519.2519                 | 3                      | NCSFNITTSIR      | [Hex]15[HexNAc]4       |
| 3+ | 1573.2741                  | 1573.2695                 | 3                      | NCSFNITTSIR      | [Hex]16[HexNAc]4       |
| 3+ | 1627.292                   | 1627.2871                 | 3                      | NCSFNITTSIR      | [Hex]17[HexNAc]4       |
| 3+ | 1681.3087                  | 1681.3047                 | 2                      | NCSFNITTSIR      | [Hex]18[HexNAc]4       |
| 3+ | 1735.3252                  | 1735.3223                 | 2                      | NCSFNITTSIR      | [Hex]19[HexNAc]4       |
| 3+ | 1789.3425                  | 1789.3399                 | 1                      | NCSFNITTSIR      | [Hex]20[HexNAc]4       |
| 3+ | 1843.3602                  | 1843.3575                 | 1                      | NCSFNITTSIR      | [Hex]21[HexNAc]4       |
| 3+ | 1897.3812                  | 1897.3751                 | 3                      | NCSFNITTSIR      | [Hex]22[HexNAc]4       |
|    |                            |                           |                        |                  |                        |
| 4+ | 1075.1885                  | 1075.1789                 | 9                      | NCSFNITTSIR      | [Hex]10[HexNAc]6[Fuc]1 |
| 4+ | 1058.6573                  | 1058.6643                 | 7                      | NCSFNITTSIR      | [Hex]13[HexNAc]4       |
|    |                            |                           |                        |                  |                        |
| 2+ | 758.3585                   | 758.3563                  | 3                      | NCSFNITTSIR      | [HexNAc]               |
| 2+ | 859.8994                   | 859.8987                  | 1                      | NCSFNITTSIR      | [HexNAc]2              |
| 2+ | 940.9272                   | 940.9251                  | 2                      | NCSFNITTSIR      | [Hex]1[HexNAc]2        |

| CS | Experimental<br><i>m/z</i> | Theoretical<br><i>m/z</i> | Mass<br>Error<br>(ppm) | Peptide Sequence | Glycan                        |
|----|----------------------------|---------------------------|------------------------|------------------|-------------------------------|
| 2+ | 1102.9838                  | 1102.9779                 | 5                      | NCSFNITTSIR      | [Hex]3[HexNAc]2               |
| 2+ | 1204.525                   | 1204.5176                 | 6                      | NCSFNITTSIR      | [Hex]3[HexNAc]3               |
| 2+ | 1277.5516                  | 1277.5466                 | 4                      | NCSFNITTSIR      | [Hex]3[HexNAc]3[Fuc]1         |
| 2+ | 1306.0599                  | 1306.0573                 | 2                      | NCSFNITTSIR      | [Hex]3[HexNAc]4               |
| 2+ | 1480.6325                  | 1480.626                  | 4                      | NCSFNITTSIR      | [Hex]3[HexNAc]5[Fuc]1         |
| 3+ | 1055.121                   | 1055.1129                 | 8                      | NCSFNITTSIR      | [Hex]3[HexNAc]6[Fuc]1         |
| 2+ | 1184.0091                  | 1184.0044                 | 4                      | NCSFNITTSIR      | [Hex]4[HexNAc]2               |
| 2+ | 1285.5390                  | 1285.5440                 | 4                      | NCSFNITTSIR      | [Hex]4[HexNAc]3               |
| 2+ | 1265.0367                  | 1265.0307                 | 5                      | NCSFNITTSIR      | [Hex]5[HexNAc]2               |
| 2+ | 1366.5770                  | 1366.5704                 | 5                      | NCSFNITTSIR      | [Hex]5[HexNAc]3               |
| 2+ | 1346.0628                  | 1346.0572                 | 4                      | NCSFNITTSIR      | [Hex]6[HexNAc]2               |
| 2+ | 1447.5980                  | 1447.5968                 | 1                      | NCSFNITTSIR      | [Hex]6[HexNAc]3               |
| 2+ | 1427.0899                  | 1427.0836                 | 4                      | NCSFNITTSIR      | [Hex]7[HexNAc]2               |
| 2+ | 1589.1437                  | 1589.1364                 | 5                      | NCSFNITTSIR      | [Hex]9[HexNAc]2               |
| 2+ | 1670.1678                  | 1670.1628                 | 3                      | NCSFNITTSIR      | [Hex]10[HexNAc]2              |
| 2+ | 1751.1713                  | 1751.1892                 | 10                     | NCSFNITTSIR      | [Hex]11[HexNAc]2              |
|    |                            |                           |                        |                  |                               |
| 2+ | 1407.5971                  | 1407.5970                 | 0.1                    | NCSFNITTSIR*     | [Hex]3[HexNAc]5               |
| 2+ | 1480.6228                  | 1480.626                  | 2                      | NCSFNITTSIR*     | [Hex]3[HexNAc]5[Fuc]1         |
| 2+ | 1582.1692                  | 1582.1657                 | 2                      | NCSFNITTSIR*     | [Hex]3[HexNAc]6[Fuc]1         |
| 3+ | 1289.5277                  | 1289.5185                 | 7                      | NCSFNITTSIR*     | [Hex]5[HexNAc]5[Fuc]1[NeuAc]2 |
| 3+ | 1235.5098                  | 1235.5009                 | 7                      | NCSFNITTSIR*     | [Hex]4[HexNAc]5[Fuc]1[NeuAc]2 |
| 3+ | 1240.8365                  | 1240.8326                 | 3                      | NCSFNITTSIR*     | [Hex]5[HexNAc]5[NeuAc]2       |
|    |                            |                           |                        |                  |                               |
| 2+ | 911.9458                   | 911.9418                  | 4                      | LDVVPIDNNNTSYR   | [HexNAc]                      |
| 2+ | 1013.4867                  | 1013.4842                 | 2                      | LDVVPIDNNNTSYR   | [HexNAc]2                     |
| 2+ | 1094.5130                  | 1094.5106                 | 2                      | LDVVPIDNNNTSYR   | [Hex]1[HexNAc]2               |
| 2+ | 1175.5439                  | 1175.5370                 | 6                      | LDVVPIDNNNTSYR   | [Hex]2[HexNAc]2               |
| 2+ | 1256.5622                  | 1256.5634                 | 1                      | LDVVPIDNNNTSYR   | [Hex]3[HexNAc]2               |
| 2+ | 1431.1290                  | 1431.1321                 | 2                      | LDVVPIDNNNTSYR   | [Hex]3[HexNAc]3[Fuc]1         |
| 2+ | 1532.6691                  | 1532.6717                 | 2                      | LDVVPIDNNNTSYR   | [Hex]3[HexNAc]4[Fuc]1         |
| 2+ | 1634.2088                  | 1634.2115                 | 2                      | LDVVPIDNNNTSYR   | [Hex]3[HexNAc]5[Fuc]1         |
| 2+ | 1735.7490                  | 1735.7512                 | 1                      | LDVVPIDNNNTSYR   | [Hex]3[HexNAc]6[Fuc]1         |
| 2+ | 1337.5882                  | 1337.5899                 | 1                      | LDVVPIDNNNTSYR   | [Hex]4[HexNAc]2               |
| 2+ | 1613.6978                  | 1613.6982                 | 0.2                    | LDVVPIDNNNTSYR   | [Hex]4[HexNAc]4 [Fuc]1        |
| 2+ | 1759.2439                  | 1759.2459                 | 1                      | LDVVPIDNNNTSYR   | [Hex]4[HexNAc]4[Fuc]1[NeuAc]1 |
| 2+ | 1715.2351                  | 1715.2378                 | 2                      | LDVVPIDNNNTSYR   | [Hex]4[HexNAc]5[Fuc]1         |
| 2+ | 1816.7803                  | 1816.7775                 | 2                      | LDVVPIDNNNTSYR   | [Hex]4[HexNAc]6[Fuc]1         |
| 2+ | 1418.6202                  | 1418.6162                 | 3                      | LDVVPIDNNNTSYR   | [Hex]5[HexNAc]2               |
| 2+ | 1796.2690                  | 1796.2643                 | 3                      | LDVVPIDNNNTSYR   | [Hex]5[HexNAc]5[Fuc]1         |
| 2+ | 1499.6445                  | 1499.6427                 | 1                      | LDVVPIDNNNTSYR   | [Hex]6[HexNAc]2               |
| 2+ | 1580.6676                  | 1580.6691                 | 1                      | LDVVPIDNNNTSYR   | [Hex]7[HexNAc]2               |
| 2+ | 1661.6990                  | 1661.6955                 | 2                      | LDVVPIDNNNTSYR   | [Hex]8[HexNAc]2               |
| 2+ | 1742.7233                  | 1742.7219                 | 1                      | LDVVPIDNNNTSYR   | [Hex]9[HexNAc]2               |
| 2+ | 1823.7514                  | 1823.7483                 | 2                      | LDVVPIDNNNTSYR   | [Hex]10[HexNAc]2              |
| 2+ | 1904.7761                  | 1904.7747                 | 1                      | LDVVPIDNNNTSYR   | [Hex]11[HexNAc]2              |
| 2+ | 1985.7995                  | 1985.8011                 | 1                      | LDVVPIDNNNTSYR   | [Hex]12[HexNAc]2              |
|    |                            |                           |                        |                  |                               |
| 3+ | 905.7376                   | 905.7378                  | 0.2                    | LDVVPIDNNNTSYR   | [Hex]3[HexNAc]3               |
| 3+ | 973.4337                   | 973.4309                  | 3                      | LDVVPIDNNNTSYR   | [Hex]3[HexNAc]4               |

| CS | Experimental<br><i>m/z</i> | Theoretical<br><i>m/z</i> | Mass<br>Error<br>(ppm) | Peptide Sequence | Glycan                        |
|----|----------------------------|---------------------------|------------------------|------------------|-------------------------------|
| 3+ | 1240.8584                  | 1240.8595                 | 1                      | LDVVPIDNNNTSYR   | [Hex]4[HexNAc]5[Fuc]1[NeuAc]1 |
| 3+ | 1308.5522                  | 1308.5526                 | 0.3                    | LDVVPIDNNNTSYR   | [Hex]4[HexNAc]6[Fuc]1[NeuAc]1 |
| 3+ | 1013.7801                  | 1013.7730                 | 7                      | LDVVPIDNNNTSYR   | [Hex]5[HexNAc]3               |
| 3+ | 1130.1608                  | 1130.1521                 | 8                      | LDVVPIDNNNTSYR   | [Hex]5[HexNAc]4[Fuc]1         |
| 3+ | 1227.1848                  | 1227.1839                 | 1                      | LDVVPIDNNNTSYR   | [Hex]5[HexNAc]4[Fuc]1[NeuAc]1 |
| 3+ | 1324.2157                  | 1324.2157                 | 0                      | LDVVPIDNNNTSYR   | [Hex]5[HexNAc]4[Fuc]1[NeuAc]2 |
| 3+ | 1294.8794                  | 1294.8771                 | 2                      | LDVVPIDNNNTSYR   | [Hex]5[HexNAc]5[Fuc]1[NeuAc]1 |
| 3+ | 1391.9096                  | 1391.9089                 | 0.5                    | LDVVPIDNNNTSYR   | [Hex]5[HexNAc]5[Fuc]1[NeuAc]2 |
| 3+ | 1265.5399                  | 1265.5384                 | 1                      | LDVVPIDNNNTSYR   | [Hex]5[HexNAc]6[Fuc]1         |
| 3+ | 1362.5674                  | 1362.5702                 | 2                      | LDVVPIDNNNTSYR   | [Hex]5[HexNAc]6[Fuc]1[NeuAc]1 |
| 3+ | 1164.8298                  | 1164.8224                 | 6                      | LDVVPIDNNNTSYR   | [Hex]6[HexNAc]3[NeuAc]1       |
| 3+ | 1251.8727                  | 1251.8629                 | 8                      | LDVVPIDNNNTSYR   | [Hex]6[HexNAc]5[Fuc]1         |
| 3+ | 1348.8968                  | 1348.8947                 | 2                      | LDVVPIDNNNTSYR   | [Hex]6[HexNAc]5[Fuc]1[NeuAc]1 |
| 3+ | 1445.9295                  | 1445.9265                 | 2                      | LDVVPIDNNNTSYR   | [Hex]6[HexNAc]5[Fuc]1[NeuAc]2 |
| 3+ | 1542.9577                  | 1542.9583                 | 0.4                    | LDVVPIDNNNTSYR   | [Hex]6[HexNAc]5[Fuc]1[NeuAc]3 |
| 3+ | 1319.5433                  | 1319.5560                 | 10                     | LDVVPIDNNNTSYR   | [Hex]6[HexNAc]6[Fuc]1         |
| 3+ | 1416.5985                  | 1416.5878                 | 8                      | LDVVPIDNNNTSYR   | [Hex]6[HexNAc]6[Fuc]1[NeuAc]1 |
| 3+ | 1513.6126                  | 1513.6196                 | 5                      | LDVVPIDNNNTSYR   | [Hex]6[HexNAc]6[Fuc]1[NeuAc]2 |
| 3+ | 1610.6582                  | 1610.6514                 | 4                      | LDVVPIDNNNTSYR   | [Hex]6[HexNAc]6[Fuc]1[NeuAc]3 |
| 3+ | 1305.8793                  | 1305.8805                 | 1                      | LDVVPIDNNNTSYR   | [Hex]7[HexNAc]5[Fuc]1         |
| 3+ | 1373.5600                  | 1373.5736                 | 10                     | LDVVPIDNNNTSYR   | [Hex]7[HexNAc]6[Fuc]1         |
| 3+ | 1470.6039                  | 1470.6054                 | 1                      | LDVVPIDNNNTSYR   | [Hex]7[HexNAc]6[Fuc]1[NeuAc]1 |
| 3+ | 1567.6348                  | 1567.6372                 | 2                      | LDVVPIDNNNTSYR   | [Hex]7[HexNAc]6[Fuc]1[NeuAc]2 |
| 3+ | 1664.6665                  | 1664.6690                 | 2                      | LDVVPIDNNNTSYR   | [Hex]7[HexNAc]6[Fuc]1[NeuAc]3 |
| 4+ | 1094.9599                  | 1094.9533                 | 6                      | LDVVPIDNNNTSYR   | [Hex]5[HexNAc]6[Fuc]1[NeuAc]2 |
| 4+ | 1058.4290                  | 1058.4389                 | 9                      | LDVVPIDNNNTSYR   | [Hex]5[HexNAc]6[NeuAc]2       |
|    |                            |                           |                        |                  |                               |
| 2+ | 810.4047                   | 810.4048                  | 0.1                    | LDVVPIDNNNTSYR   | non-glycosylated              |
|    |                            |                           |                        |                  |                               |
| 2+ | 951.8878                   | 951.8891                  | 1                      | SDNFTNNAK        | [Hex]3[HexNAc]2               |
| 2+ | 1053.4325                  | 1053.4288                 | 4                      | SDNFTNNAK        | [Hex]3[HexNAc]3               |
| 2+ | 1126.4652                  | 1126.4578                 | 7                      | SDNFTNNAK        | [Hex]3[HexNAc]3[Fuc]1         |
| 2+ | 1154.9623                  | 1154.9685                 | 5                      | SDNFTNNAK        | [Hex]3[HexNAc]4               |
| 2+ | 1228.0049                  | 1227.9974                 | 6                      | SDNFTNNAK        | [Hex]3[HexNAc]4[Fuc]1         |
| 2+ | 1256.5071                  | 1256.5082                 | 1                      | SDNFTNNAK        | [Hex]3[HexNAc]5               |
| 2+ | 1329.5262                  | 1329.5372                 | 8                      | SDNFTNNAK        | [Hex]3[HexNAc]5[Fuc]1         |
| 2+ | 1329.5348                  | 1329.5372                 | 2                      | SDNFTNNAK        | [Hex]3[HexNAc]5[Fuc]1         |
| 2+ | 1358.0464                  | 1358.0479                 | 1                      | SDNFTNNAK        | [Hex]3[HexNAc]6               |
| 2+ | 1431.0725                  | 1431.0769                 | 3                      | SDNFTNNAK        | [Hex]3[HexNAc]6[Fuc]1         |
| 2+ | 1032.9157                  | 1032.9156                 | 0.1                    | SDNFTNNAK        | [Hex]4[HexNAc]2               |
| 2+ | 1454.5822                  | 1454.5716                 | 7                      | SDNFTNNAK        | [Hex]4[HexNAc]4[Fuc]1[NeuAc]1 |
| 2+ | 1556.1135                  | 1556.1113                 | 1                      | SDNFTNNAK        | [Hex]4[HexNAc]5[Fuc]1[NeuAc]1 |
| 2+ | 1113.9438                  | 1113.9419                 | 2                      | SDNFTNNAK        | [Hex]5[HexNAc]2               |
| 2+ | 1194.9683                  | 1194.9684                 | 0.1                    | SDNFTNNAK        | [Hex]6[HexNAc]2               |
| 2+ | 1275.9978                  | 1275.9948                 | 2                      | SDNFTNNAK        | [Hex]7[HexNAc]2               |
| 2+ | 1357.0226                  | 1357.0212                 | 1                      | SDNFTNNAK        | [Hex]8[HexNAc]2               |
| 2+ | 1438.0487                  | 1438.0476                 | 1                      | SDNFTNNAK        | [Hex]9[HexNAc]2               |
| 2+ | 1519.0864                  | 1519.0740                 | 8                      | SDNFTNNAK        | [Hex]10[HexNAc]2              |
| 2+ | 1600.1144                  | 1600.1004                 | 9                      | SDNFTNNAK        | [Hex]11[HexNAc]2              |
|    |                            |                           |                        |                  |                               |

| CS | Experimental<br><i>m/z</i> | Theoretical<br><i>m/z</i> | Mass<br>Error<br>(ppm) | Peptide Sequence                | Glycan                |
|----|----------------------------|---------------------------|------------------------|---------------------------------|-----------------------|
| 5+ | 1113.9532                  | 1113.9287                 | 22                     | NVSTVQCTHGIRPVVSTQLLNGSLAEEVVIR | [Hex]7[HexNAc]4       |
| 5+ | 1146.3592                  | 1146.3392                 | 17                     | NVSTVQCTHGIRPVVSTQLLNGSLAEEVVIR | [Hex]8[HexNAc]4       |
| 5+ | 1178.7625                  | 1178.7498                 | 11                     | NVSTVQCTHGIRPVVSTQLLNGSLAEEVVIR | [Hex]9[HexNAc]4       |
| 5+ | 1211.1642                  | 1211.1604                 | 3                      | NVSTVQCTHGIRPVVSTQLLNGSLAEEVVIR | [Hex]10[HexNAc]4      |
| 5+ | 1243.5753                  | 1243.5709                 | 4                      | NVSTVQCTHGIRPVVSTQLLNGSLAEEVVIR | [Hex]11[HexNAc]4      |
| 5+ | 1275.9839                  | 1275.9815                 | 2                      | NVSTVQCTHGIRPVVSTQLLNGSLAEEVVIR | [Hex]12[HexNAc]4      |
| 5+ | 1308.3994                  | 1308.3921                 | 6                      | NVSTVQCTHGIRPVVSTQLLNGSLAEEVVIR | [Hex]13[HexNAc]4      |
| 5+ | 1340.8053                  | 1340.8026                 | 2                      | NVSTVQCTHGIRPVVSTQLLNGSLAEEVVIR | [Hex]14[HexNAc]4      |
| 5+ | 1405.6305                  | 1405.6238                 | 5                      | NVSTVQCTHGIRPVVSTQLLNGSLAEEVVIR | [Hex]16[HexNAc]4      |
| 5+ | 1438.0393                  | 1438.0343                 | 3                      | NVSTVQCTHGIRPVVSTQLLNGSLAEEVVIR | [Hex]17[HexNAc]4      |
| 5+ | 1470.4505                  | 1470.4449                 | 4                      | NVSTVQCTHGIRPVVSTQLLNGSLAEEVVIR | [Hex]18[HexNAc]4      |
| 5+ | 1502.8582                  | 1502.8554                 | 2                      | NVSTVQCTHGIRPVVSTQLLNGSLAEEVVIR | [Hex]19[HexNAc]4      |
| 5+ | 1535.2791                  | 1535.2660                 | 9                      | NVSTVQCTHGIRPVVSTQLLNGSLAEEVVIR | [Hex]20[HexNAc]4      |
| 5+ | 1567.6917                  | 1567.6766                 | 10                     | NVSTVQCTHGIRPVVSTQLLNGSLAEEVVIR | [Hex]21[HexNAc]4      |
| 5+ | 1632.5046                  | 1632.4977                 | 4                      | NVSTVQCTHGIRPVVSTQLLNGSLAEEVVIR | [Hex]23[HexNAc]4      |
|    |                            |                           |                        |                                 |                       |
| 2+ | 787.8826                   | 787.8805                  | 3                      | NVSTVQCTHGIR                    | [HexNAc]              |
| 2+ | 889.4230                   | 889.4229                  | 0.1                    | NVSTVQCTHGIR                    | [HexNAc]2             |
| 2+ | 970.4491                   | 970.4493                  | 0.2                    | NVSTVQCTHGIR                    | [Hex]1[HexNAc]2       |
| 2+ | 1456.6093                  | 1456.6078                 | 1                      | NVSTVQCTHGIR                    | [Hex]7[HexNAc]2       |
|    |                            |                           |                        |                                 |                       |
| 3+ | 701.3204                   | 701.3196                  | 1                      | NVSTVQCTHGIR                    | [Hex]2[HexNAc]2       |
| 3+ | 755.3368                   | 755.3372                  | 1                      | NVSTVQCTHGIR                    | [Hex]3[HexNAc]2       |
| 3+ | 823.0299                   | 823.0303                  | 1                      | NVSTVQCTHGIR                    | [Hex]3[HexNAc]3       |
| 3+ | 890.7230                   | 890.7234                  | 0.4                    | NVSTVQCTHGIR                    | [Hex]3[HexNAc]4       |
| 3+ | 871.7218                   | 871.7163                  | 6                      | NVSTVQCTHGIR                    | [Hex]3[HexNAc]3[Fuc]1 |
| 3+ | 939.4140                   | 939.4094                  | 5                      | NVSTVQCTHGIR                    | [Hex]3[HexNAc]4[Fuc]1 |
| 3+ | 1007.1067                  | 1007.1025                 | 4                      | NVSTVQCTHGIR                    | [Hex]3[HexNAc]5[Fuc]1 |
| 3+ | 1074.7913                  | 1074.7957                 | 4                      | NVSTVQCTHGIR                    | [Hex]3[HexNAc]6[Fuc]1 |
| 3+ | 809.3539                   | 809.3548                  | 1                      | NVSTVQCTHGIR                    | [Hex]4[HexNAc]2       |
| 3+ | 877.0528                   | 877.0479                  | 6                      | NVSTVQCTHGIR                    | [Hex]4[HexNAc]3       |
| 3+ | 863.3720                   | 863.3724                  | 0.5                    | NVSTVQCTHGIR                    | [Hex]5[HexNAc]2       |
| 3+ | 931.0698                   | 931.0655                  | 5                      | NVSTVQCTHGIR                    | [Hex]5[HexNAc]3       |
| 3+ | 979.7580                   | 979.7515                  | 7                      | NVSTVQCTHGIR                    | [Hex]5[HexNAc]3[Fuc]1 |
| 3+ | 917.3892                   | 917.3900                  | 1                      | NVSTVQCTHGIR                    | [Hex]6[HexNAc]2       |
| 3+ | 1025.4253                  | 1025.4252                 | 0.1                    | NVSTVQCTHGIR                    | [Hex]8[HexNAc]2       |
| 3+ | 1079.4446                  | 1079.4428                 | 2                      | NVSTVQCTHGIR                    | [Hex]9[HexNAc]2       |
| 3+ | 1133.4661                  | 1133.4604                 | 5                      | NVSTVQCTHGIR                    | [Hex]10[HexNAc]2      |
| 3+ | 1187.4804                  | 1187.4780                 | 2                      | NVSTVQCTHGIR                    | [Hex]11[HexNAc]2      |
|    |                            |                           |                        |                                 |                       |
| 2+ | 686.3449                   | 686.3435                  | 2                      | NVSTVQCTHGIR                    | non-glycosylated      |
|    |                            |                           |                        |                                 |                       |
| 3+ | 932.5257                   | 932.5201                  | 6                      | GIRPVVSTQLLNGSLAEEVVIR          | [HexNAc]              |
| 3+ | 1000.2141                  | 1000.2151                 | 1                      | GIRPVVSTQLLNGSLAEEVVIR          | [HexNAc]2             |
| 3+ | 1054.2376                  | 1054.2327                 | 5                      | GIRPVVSTQLLNGSLAEEVVIR          | [Hex]1[HexNAc]2       |
| 3+ | 1108.2423                  | 1108.2503                 | 7                      | GIRPVVSTQLLNGSLAEEVVIR          | [Hex]2[HexNAc]2       |
| 3+ | 1162.2717                  | 1162.2679                 | 3                      | GIRPVVSTQLLNGSLAEEVVIR          | [Hex]3[HexNAc]2       |
|    |                            |                           |                        |                                 |                       |
| 4+ | 912.4733                   | 912.4660                  | 8                      | GIRPVVSTQLLNGSLAEEVVIR          | [Hex]4[HexNAc]2       |
| 4+ | 952.9869                   | 952.9791                  | 8                      | GIRPVVSTQLLNGSLAEEVVIR          | [Hex]5[HexNAc]2       |

| CS | Experimental <i>m/z</i> | Theoretical <i>m/z</i> | Mass Error (ppm) | Peptide Sequence        | Glycan                 |
|----|-------------------------|------------------------|------------------|-------------------------|------------------------|
| 4+ | 993.4910                | 993.4924               | 1                | GIRPVVSTQLLNGSLAEEEVVIR | [Hex]6[HexNAc]2        |
| 4+ | 1034.0120               | 1034.0056              | 6                | GIRPVVSTQLLNGSLAEEEVVIR | [Hex]7[HexNAc]2        |
| 4+ | 1074.5181               | 1074.5188              | 1                | GIRPVVSTQLLNGSLAEEEVVIR | [Hex]8[HexNAc]2        |
| 4+ | 1115.0368               | 1115.0320              | 4                | GIRPVVSTQLLNGSLAEEEVVIR | [Hex]9[HexNAc]2        |
| 4+ | 1155.5446               | 1155.5452              | 0.5              | GIRPVVSTQLLNGSLAEEEVVIR | [Hex]10[HexNAc]2       |
| 4+ | 1196.0650               | 1196.0584              | 6                | GIRPVVSTQLLNGSLAEEEVVIR | [Hex]11[HexNAc]2       |
|    |                         |                        |                  |                         |                        |
| 2+ | 1055.5425               | 1055.5361              | 6                | LLNGSLAEEEVVIR          | [Hex]1[HexNAc]2        |
| 2+ | 1290.6285               | 1290.6179              | 8                | LLNGSLAEEEVVIR          | [Hex]3[HexNAc]2[Fuc]1  |
| 2+ | 1319.1383               | 1319.1286              | 7                | LLNGSLAEEEVVIR          | [Hex]3[HexNAc]3        |
| 2+ | 1392.1714               | 1392.1576              | 10               | LLNGSLAEEEVVIR          | [Hex]3[HexNAc]3[Fuc]1  |
| 2+ | 1493.7131               | 1493.6972              | 11               | LLNGSLAEEEVVIR          | [Hex]3[HexNAc]4[Fuc]1  |
| 2+ | 1595.2457               | 1595.2370              | 5                | LLNGSLAEEEVVIR          | [Hex]3[HexNAc]5[Fuc]1  |
| 2+ | 1696.7662               | 1696.7767              | 6                | LLNGSLAEEEVVIR          | [Hex]3[HexNAc]6[Fuc]1  |
| 2+ | 1784.7922               | 1784.7738              | 10               | LLNGSLAEEEVVIR          | [Hex]10[HexNAc]2       |
| 2+ | 1865.7916               | 1865.8002              | 5                | LLNGSLAEEEVVIR          | [Hex]11[HexNAc]2       |
|    |                         |                        |                  |                         |                        |
| 3+ | 812.0625                | 812.0617               | 1                | LLNGSLAEEEVVIR          | [Hex]3[HexNAc]2        |
| 3+ | 866.0828                | 866.0793               | 4                | LLNGSLAEEEVVIR          | [Hex]4[HexNAc]2        |
| 3+ | 974.1199                | 974.1145               | 6                | LLNGSLAEEEVVIR          | [Hex]6[HexNAc]2        |
| 3+ | 1028.1383               | 1028.1321              | 6                | LLNGSLAEEEVVIR          | [Hex]7[HexNAc]2        |
| 3+ | 1082.1573               | 1082.1497              | 7                | LLNGSLAEEEVVIR          | [Hex]8[HexNAc]2        |
|    |                         |                        |                  |                         |                        |
| 2+ | 929.5156                | 929.5093               | 7                | LLLNGSLAEEEVVIR         | [HexNAc]               |
| 2+ | 1031.0524               | 1031.0517              | 1                | LLLNGSLAEEEVVIR         | [HexNAc]2              |
| 2+ | 1436.1880               | 1436.1837              | 3                | LLLNGSLAEEEVVIR         | [Hex]5[HexNAc]2        |
| 2+ | 1760.3041               | 1760.2894              | 8                | LLLNGSLAEEEVVIR         | [Hex]9[HexNAc]2        |
|    |                         |                        |                  |                         |                        |
| 2+ | 771.4327                | 771.4303               | 3.1              | LLNGSLAEEEVVIR          | non-glycosylated       |
|    |                         |                        |                  |                         |                        |
| 3+ | 1304.8795               | 1304.8649              | 11               | ESVEINTRPNNNTR          | [Hex]8[HexNAc]4        |
| 3+ | 1488.9371               | 1488.9372              | 0                | ESVEINTRPNNNTR          | [Hex]8[HexNAc]6[Fuc]1  |
| 3+ | 1358.8808               | 1358.8826              | 1                | ESVEINTRPNNNTR          | [Hex]9[HexNAc]4        |
| 3+ | 1475.2779               | 1475.2616              | 11               | ESVEINTRPNNNTR          | [Hex]9[HexNAc]5[Fuc]1  |
| 3+ | 1542.9719               | 1542.9548              | 11               | ESVEINTRPNNNTR          | [Hex]9[HexNAc]6[Fuc]1  |
| 3+ | 1412.9030               | 1412.9002              | 2                | ESVEINTRPNNNTR          | [Hex]10[HexNAc]4       |
| 3+ | 1480.5990               | 1480.5933              | 4                | ESVEINTRPNNNTR          | [Hex]10[HexNAc]5       |
| 3+ | 1529.2946               | 1529.2792              | 10               | ESVEINTRPNNNTR          | [Hex]10[HexNAc]5[Fuc]1 |
| 3+ | 1596.9719               | 1596.9724              | 0.3              | ESVEINTRPNNNTR          | [Hex]10[HexNAc]6[Fuc]1 |
| 3+ | 1664.6621               | 1664.6655              | 2                | ESVEINTRPNNNTR          | [Hex]10[HexNAc]7[Fuc]1 |
| 3+ | 1466.9126               | 1466.9178              | 4                | ESVEINTRPNNNTR          | [Hex]11[HexNAc]4       |
| 3+ | 1534.6296               | 1534.6108              | 12               | ESVEINTRPNNNTR          | [Hex]11[HexNAc]5       |
| 3+ | 1583.3081               | 1583.2968              | 7                | ESVEINTRPNNNTR          | [Hex]11[HexNAc]5[Fuc]1 |
| 3+ | 1650.9930               | 1650.9900              | 2                | ESVEINTRPNNNTR          | [Hex]11[HexNAc]6[Fuc]1 |
| 3+ | 1718.6833               | 1718.6831              | 0.1              | ESVEINTRPNNNTR          | [Hex]11[HexNAc]7[Fuc]1 |
| 3+ | 1520.9380               | 1520.9354              | 2                | ESVEINTRPNNNTR          | [Hex]12[HexNAc]4       |
| 3+ | 1588.6238               | 1588.6285              | 3                | ESVEINTRPNNNTR          | [Hex]12[HexNAc]5       |
| 3+ | 1637.3170               | 1637.3145              | 2                | ESVEINTRPNNNTR          | [Hex]12[HexNAc]5[Fuc]1 |
| 3+ | 1656.3228               | 1656.3216              | 1                | ESVEINTRPNNNTR          | [Hex]12[HexNAc]6       |
| 3+ | 1705.0074               | 1705.0076              | 0.1              | ESVEINTRPNNNTR          | [Hex]12[HexNAc]6[Fuc]1 |

| CS | Experimental<br><i>m/z</i> | Theoretical<br><i>m/z</i> | Mass<br>Error<br>(ppm) | Peptide Sequence | Glycan                         |
|----|----------------------------|---------------------------|------------------------|------------------|--------------------------------|
| 3+ | 1574.9545                  | 1574.9530                 | 1                      | ESVEINCRPNNNTR   | [Hex]13[HexNAc]4               |
| 3+ | 1642.6482                  | 1642.6461                 | 1                      | ESVEINCRPNNNTR   | [Hex]13[HexNAc]5               |
| 3+ | 1628.9738                  | 1628.9706                 | 2                      | ESVEINCRPNNNTR   | [Hex]14[HexNAc]4               |
| 3+ | 1813.0414                  | 1813.0428                 | 1                      | ESVEINCRPNNNTR   | [Hex]14[HexNAc]6[Fuc]1         |
| 3+ | 1910.0578                  | 1910.0746                 | 9                      | ESVEINCRPNNNTR   | [Hex]14[HexNAc]6[Fuc]1[NeuAc]1 |
| 3+ | 1682.9921                  | 1682.9882                 | 2                      | ESVEINCRPNNNTR   | [Hex]15[HexNAc]4               |
| 3+ | 1737.0110                  | 1737.0058                 | 3                      | ESVEINCRPNNNTR   | [Hex]16[HexNAc]4               |
| 3+ | 1791.0284                  | 1791.0234                 | 3                      | ESVEINCRPNNNTR   | [Hex]17[HexNAc]4               |
| 3+ | 1845.0450                  | 1845.0410                 | 2                      | ESVEINCRPNNNTR   | [Hex]18[HexNAc]4               |
| 3+ | 1899.0623                  | 1899.0586                 | 2                      | ESVEINCRPNNNTR   | [Hex]19[HexNAc]4               |
| 3+ | 1953.0786                  | 1953.0762                 | 1                      | ESVEINCRPNNNTR   | [Hex]20[HexNAc]4               |
|    |                            |                           |                        |                  |                                |
| 4+ | 1299.5325                  | 1299.5208                 | 9                      | ESVEINCRPNNNTR   | [Hex]10[HexNAc]8[Fuc]1         |
| 4+ | 1329.7825                  | 1329.7773                 | 4                      | ESVEINCRPNNNTR   | [Hex]12[HexNAc]7[Fuc]1         |
| 4+ | 1380.5625                  | 1380.5472                 | 11                     | ESVEINCRPNNNTR   | [Hex]12[HexNAc]8[Fuc]1         |
| 4+ | 1319.5210                  | 1319.5207                 | 0.2                    | ESVEINCRPNNNTR   | [Hex]13[HexNAc]6[Fuc]1         |
| 4+ | 1546.0954                  | 1546.0854                 | 6                      | ESVEINCRPNNNTR   | [Hex]22[HexNAc]4               |
| 4+ | 1505.5885                  | 1505.5722                 | 11                     | ESVEINCRPNNNTR   | [Hex]21[HexNAc]4               |
|    |                            |                           |                        |                  |                                |
| 2+ | 1003.9662                  | 1003.9607                 | 5                      | ESVEINCRPNNNTR   | [HexNAc]                       |
| 2+ | 1105.5007                  | 1105.5031                 | 2                      | ESVEINCRPNNNTR   | [HexNAc]2                      |
| 2+ | 1186.5410                  | 1186.5295                 | 10                     | ESVEINCRPNNNTR   | [Hex]1[HexNAc]2                |
| 2+ | 1267.5632                  | 1267.5559                 | 6                      | ESVEINCRPNNNTR   | [Hex]2[HexNAc]2                |
| 3+ | 899.3877                   | 899.3907                  | 3                      | ESVEINCRPNNNTR   | [Hex]3[HexNAc]2                |
| 3+ | 1083.4725                  | 1083.4629                 | 9                      | ESVEINCRPNNNTR   | [Hex]3[HexNAc]4[Fuc]1          |
| 3+ | 1151.1560                  | 1151.1560                 | 0                      | ESVEINCRPNNNTR   | [Hex]3[HexNAc]5[Fuc]1          |
| 3+ | 953.4064                   | 953.4083                  | 2                      | ESVEINCRPNNNTR   | [Hex]4[HexNAc]2                |
| 3+ | 1007.4285                  | 1007.4259                 | 3                      | ESVEINCRPNNNTR   | [Hex]5[HexNAc]2                |
| 3+ | 1061.4427                  | 1061.4435                 | 1                      | ESVEINCRPNNNTR   | [Hex]6[HexNAc]2                |
| 3+ | 1115.4727                  | 1115.4611                 | 10                     | ESVEINCRPNNNTR   | [Hex]7[HexNAc]2                |
| 3+ | 1169.4808                  | 1169.4787                 | 2                      | ESVEINCRPNNNTR   | [Hex]8[HexNAc]2                |
| 3+ | 1223.5000                  | 1223.4963                 | 3                      | ESVEINCRPNNNTR   | [Hex]9[HexNAc]2                |
| 3+ | 1277.5192                  | 1277.5139                 | 4                      | ESVEINCRPNNNTR   | [Hex]10[HexNAc]2               |
| 3+ | 1331.5366                  | 1331.5315                 | 4                      | ESVEINCRPNNNTR   | [Hex]11[HexNAc]2               |
|    |                            |                           |                        |                  |                                |
| 3+ | 1034.7892                  | 1034.7769                 | 12                     | ESVEINCRPNNNTR*  | [Hex]3[HexNAc]4                |
| 3+ | 1102.4796                  | 1102.4701                 | 9                      | ESVEINCRPNNNTR*  | [Hex]3[HexNAc]5                |
| 3+ | 1151.1683                  | 1151.156                  | 11                     | ESVEINCRPNNNTR*  | [Hex]3[HexNAc]5[Fuc]1          |
| 3+ | 1218.8637                  | 1218.8492                 | 12                     | ESVEINCRPNNNTR*  | [Hex]3[HexNAc]6[Fuc]1          |
| 3+ | 1267.5476                  | 1267.5351                 | 10                     | ESVEINCRPNNNTR*  | [Hex]3[HexNAc]6[Fuc]2          |
| 3+ | 1021.1146                  | 1021.1014                 | 13                     | ESVEINCRPNNNTR*  | [Hex]4[HexNAc]3                |
| 3+ | 1069.801                   | 1069.7874                 | 13                     | ESVEINCRPNNNTR*  | [Hex]4[HexNAc]3[Fuc]1          |
| 3+ | 1234.517                   | 1234.5123                 | 4                      | ESVEINCRPNNNTR*  | [Hex]4[HexNAc]4[Fuc]1[NeuAc]1  |
| 3+ | 1302.2059                  | 1302.2054                 | 0.4                    | ESVEINCRPNNNTR*  | [Hex]4[HexNAc]5[Fuc]1[NeuAc]1  |
| 3+ | 1253.5243                  | 1253.5195                 | 4                      | ESVEINCRPNNNTR*  | [Hex]4[HexNAc]5[NeuAc]1        |
| 3+ | 1272.8680                  | 1272.8667                 | 1                      | ESVEINCRPNNNTR*  | [Hex]4[HexNAc]6[Fuc]1          |
| 3+ | 1272.8754                  | 1272.8667                 | 7                      | ESVEINCRPNNNTR*  | [Hex]4[HexNAc]6[Fuc]1          |
| 3+ | 1369.8967                  | 1369.8986                 | 1                      | ESVEINCRPNNNTR*  | [Hex]4[HexNAc]6[Fuc]1[NeuAc]1  |
| 3+ | 1075.1337                  | 1075.119                  | 14                     | ESVEINCRPNNNTR*  | [Hex]5[HexNAc]3                |
| 3+ | 1123.8226                  | 1123.805                  | 16                     | ESVEINCRPNNNTR*  | [Hex]5[HexNAc]3[Fuc]1          |



| CS | Experimental<br><i>m/z</i> | Theoretical<br><i>m/z</i> | Mass<br>Error<br>(ppm) | Peptide Sequence | Glycan                        |
|----|----------------------------|---------------------------|------------------------|------------------|-------------------------------|
| 3+ | 1259.1899                  | 1259.1912                 | 1                      | ESVEINCTRPNNNTR* | [Hex]5[HexNAc]5[Fuc]1         |
| 3+ | 1356.2251                  | 1356.2230                 | 2                      | ESVEINCTRPNNNTR* | [Hex]5[HexNAc]5[Fuc]1[NeuAc]1 |
| 3+ | 1453.2529                  | 1453.2548                 | 1                      | ESVEINCTRPNNNTR* | [Hex]5[HexNAc]5[Fuc]1[NeuAc]2 |
| 3+ | 1307.5283                  | 1307.5371                 | 7                      | ESVEINCTRPNNNTR* | [Hex]5[HexNAc]5[NeuAc]1       |
| 3+ | 1326.8932                  | 1326.8843                 | 7                      | ESVEINCTRPNNNTR* | [Hex]5[HexNAc]6[Fuc]1         |
| 3+ | 1423.9100                  | 1423.9161                 | 4                      | ESVEINCTRPNNNTR* | [Hex]5[HexNAc]6[Fuc]1[NeuAc]1 |
| 3+ | 1313.2078                  | 1313.2088                 | 1                      | ESVEINCTRPNNNTR* | [Hex]6[HexNAc]5[Fuc]1         |
| 3+ | 1380.8941                  | 1380.9020                 | 6                      | ESVEINCTRPNNNTR* | [Hex]6[HexNAc]6[Fuc]1         |
| 3+ | 1574.9616                  | 1574.9656                 | 3                      | ESVEINCTRPNNNTR* | [Hex]6[HexNAc]6[Fuc]1[NeuAc]2 |
| 3+ | 1367.2305                  | 1367.2264                 | 3                      | ESVEINCTRPNNNTR* | [Hex]7[HexNAc]5[Fuc]1         |
| 3+ | 1434.9198                  | 1434.9196                 | 0.1                    | ESVEINCTRPNNNTR* | [Hex]7[HexNAc]6[Fuc]1         |
|    |                            |                           |                        |                  |                               |
| 3+ | 680.6181                   | 680.6159                  | 3                      | QAHCNISR         | [Hex]4[HexNAc]2               |
| 3+ | 734.6370                   | 734.6335                  | 5                      | QAHCNISR         | [Hex]5[HexNAc]2               |
| 3+ | 788.6565                   | 788.6511                  | 7                      | QAHCNISR         | [Hex]6[HexNAc]2               |
| 3+ | 842.6716                   | 842.6687                  | 3                      | QAHCNISR         | [Hex]7[HexNAc]2               |
| 3+ | 896.6907                   | 896.6863                  | 5                      | QAHCNISR         | [Hex]8[HexNAc]2               |
| 3+ | 950.7100                   | 950.7039                  | 6                      | QAHCNISR         | [Hex]9[HexNAc]2               |
| 3+ | 1004.7278                  | 1004.7215                 | 6                      | QAHCNISR         | [Hex]10[HexNAc]2              |
|    |                            |                           |                        |                  |                               |
| 2+ | 490.2419                   | 490.2375                  | 9                      | WNDTLK           | [HexNAc]                      |
| 2+ | 591.7834                   | 591.7799                  | 6                      | WNDTLK           | [HexNAc]2                     |
| 2+ | 672.8073                   | 672.8063                  | 1                      | WNDTLK           | [Hex]1[HexNAc]2               |
| 2+ | 753.8346                   | 753.8327                  | 3                      | WNDTLK           | [Hex]2[HexNAc]2               |
| 2+ | 834.8612                   | 834.8591                  | 3                      | WNDTLK           | [Hex]3[HexNAc]2               |
| 2+ | 936.4009                   | 936.3988                  | 2                      | WNDTLK           | [Hex]3[HexNAc]3               |
| 2+ | 1009.4321                  | 1009.4278                 | 4                      | WNDTLK           | [Hex]3[HexNAc]3[Fuc]1         |
| 2+ | 1037.9426                  | 1037.9385                 | 4                      | WNDTLK           | [Hex]3[HexNAc]4               |
| 2+ | 1110.9717                  | 1110.9674                 | 4                      | WNDTLK           | [Hex]3[HexNAc]4[Fuc]1         |
| 2+ | 1139.4830                  | 1139.4782                 | 4                      | WNDTLK           | [Hex]3[HexNAc]5               |
| 2+ | 1212.5108                  | 1212.5072                 | 3                      | WNDTLK           | [Hex]3[HexNAc]5[Fuc]1         |
| 2+ | 1314.0628                  | 1314.0469                 | 12                     | WNDTLK           | [Hex]3[HexNAc]6[Fuc]1         |
| 2+ | 1162.9765                  | 1162.9729                 | 3                      | WNDTLK           | [Hex]4[HexNAc]3[NeuAc]1       |
| 2+ | 915.8890                   | 915.8856                  | 4                      | WNDTLK           | [Hex]4[HexNAc]2               |
| 2+ | 1017.4189                  | 1017.4252                 | 6                      | WNDTLK           | [Hex]4[HexNAc]3               |
| 2+ | 1118.9651                  | 1118.9649                 | 0.2                    | WNDTLK           | [Hex]4[HexNAc]4               |
| 2+ | 1264.5173                  | 1264.5126                 | 4                      | WNDTLK           | [Hex]4[HexNAc]4[NeuAc]1       |
| 2+ | 996.9150                   | 996.9119                  | 3                      | WNDTLK           | [Hex]5[HexNAc]2               |
| 2+ | 1098.4617                  | 1098.4516                 | 9                      | WNDTLK           | [Hex]5[HexNAc]3               |
| 2+ | 1244.0053                  | 1243.9993                 | 5                      | WNDTLK           | [Hex]5[HexNAc]3[NeuAc]1       |
| 2+ | 1077.9427                  | 1077.9384                 | 4                      | WNDTLK           | [Hex]6[HexNAc]2               |
| 2+ | 1179.4732                  | 1179.4780                 | 4                      | WNDTLK           | [Hex]6[HexNAc]3               |
| 2+ | 1325.0296                  | 1325.0257                 | 3                      | WNDTLK           | [Hex]6[HexNAc]3[NeuAc]1       |
| 2+ | 1158.9699                  | 1158.9648                 | 4                      | WNDTLK           | [Hex]7[HexNAc]2               |
| 2+ | 1239.9971                  | 1239.9912                 | 5                      | WNDTLK           | [Hex]8[HexNAc]2               |
| 2+ | 1321.0233                  | 1321.0176                 | 4                      | WNDTLK           | [Hex]9[HexNAc]2               |
| 2+ | 1402.0531                  | 1402.0440                 | 6                      | WNDTLK           | [Hex]10[HexNAc]2              |
| 2+ | 1483.0863                  | 1483.0704                 | 11                     | WNDTLK           | [Hex]11[HexNAc]2              |
| 2+ | 1564.1022                  | 1564.0968                 | 3                      | WNDTLK           | [Hex]12[HexNAc]2              |

| CS | Experimental<br><i>m/z</i> | Theoretical<br><i>m/z</i> | Mass<br>Error<br>(ppm) | Peptide Sequence | Glycan                        |
|----|----------------------------|---------------------------|------------------------|------------------|-------------------------------|
| 2+ | 388.701                    | 388.7005                  | 1                      | WNDTLK           | non-glycosylated              |
| 2+ | 633.8264                   | 633.8171                  | 15                     | LREQFENK         | [HexNAc]                      |
| 2+ | 735.3585                   | 735.3596                  | 1                      | LREQFENK         | [HexNAc]2                     |
| 2+ | 816.3851                   | 816.3859                  | 1                      | LREQFENK         | [Hex]1[HexNAc]2               |
| 2+ | 1071.9802                  | 1071.9810                 | 1                      | LREQFENK         | [Hex]2[[HexNAc]3[Fuc]1        |
| 2+ | 897.4115                   | 897.4124                  | 1                      | LREQFENK         | [Hex]2[HexNAc]2               |
| 2+ | 1173.5205                  | 1173.5207                 | 0.2                    | LREQFENK         | [Hex]2[HexNAc]4[Fuc]1         |
| 2+ | 978.4408                   | 978.4388                  | 2                      | LREQFENK         | [Hex]3[HexNAc]2               |
| 2+ | 1079.9815                  | 1079.9785                 | 3                      | LREQFENK         | [Hex]3[HexNAc]3               |
| 2+ | 1153.0074                  | 1153.0074                 | 0                      | LREQFENK         | [Hex]3[HexNAc]3[Fuc]1         |
| 2+ | 1181.5129                  | 1181.5181                 | 4                      | LREQFENK         | [Hex]3[HexNAc]4               |
| 2+ | 1254.5463                  | 1254.5471                 | 1                      | LREQFENK         | [Hex]3[HexNAc]4[Fuc]1         |
| 2+ | 1059.4651                  | 1059.4652                 | 0.1                    | LREQFENK         | [Hex]4[HexNAc]2               |
| 2+ | 1234.0361                  | 1234.0338                 | 2                      | LREQFENK         | [Hex]4[HexNAc]3[Fuc]1         |
| 2+ | 1582.6609                  | 1582.6609                 | 0                      | LREQFENK         | [Hex]4[HexNAc]5[Fuc]1[NeuAc]1 |
| 2+ | 1140.4856                  | 1140.4916                 | 0.3                    | LREQFENK         | [Hex]5[HexNAc]2               |
| 2+ | 1221.5191                  | 1221.5180                 | 1                      | LREQFENK         | [Hex]6[HexNAc]2               |
| 2+ | 1302.5454                  | 1302.5444                 | 1                      | LREQFENK         | [Hex]7[HexNAc]2               |
| 2+ | 1383.5743                  | 1383.5708                 | 3                      | LREQFENK         | [Hex]8[HexNAc]2               |
| 2+ | 1464.5986                  | 1464.5972                 | 1                      | LREQFENK         | [Hex]9[HexNAc]2               |
| 2+ | 1545.6294                  | 1545.6236                 | 4                      | LREQFENK         | [Hex]10[HexNAc]2              |
| 3+ | 904.3926                   | 904.3937                  | 1                      | LREQFENK         | [Hex]3[HexNAc]5[Fuc]1         |
| 3+ | 972.0857                   | 972.0868                  | 1                      | LREQFENK         | [Hex]3[HexNAc]6[Fuc]1         |
| 3+ | 755.3417                   | 755.3319                  | 13                     | LREQFENK         | [Hex]4[HexNAc]2[Fuc]1         |
| 3+ | 774.3484                   | 774.3390                  | 12                     | LREQFENK         | [Hex]4[HexNAc]3               |
| 3+ | 890.7167                   | 890.7181                  | 2                      | LREQFENK         | [Hex]4[HexNAc]4[Fuc]1         |
| 3+ | 987.7505                   | 987.7499                  | 1                      | LREQFENK         | [Hex]4[HexNAc]4[Fuc]1[NeuAc]1 |
| 3+ | 958.4110                   | 958.4112                  | 0.2                    | LREQFENK         | [Hex]4[HexNAc]5[Fuc]1         |
| 3+ | 1152.4697                  | 1152.4749                 | 5                      | LREQFENK         | [Hex]4[HexNAc]5[Fuc]1[NeuAc]2 |
| 3+ | 1026.1034                  | 1026.1044                 | 1                      | LREQFENK         | [Hex]4[HexNAc]6[Fuc]1         |
| 3+ | 1123.1365                  | 1123.1362                 | 0.3                    | LREQFENK         | [Hex]4[HexNAc]6[Fuc]1[NeuAc]1 |
| 3+ | 809.3610                   | 809.3495                  | 14                     | LREQFENK         | [Hex]5[HexNAc]2[Fuc]1         |
| 3+ | 877.0533                   | 877.0426                  | 12                     | LREQFENK         | [Hex]5[HexNAc]3[Fuc]1         |
| 3+ | 944.7385                   | 944.7357                  | 3                      | LREQFENK         | [Hex]5[HexNAc]4[Fuc]1         |
| 3+ | 1041.7677                  | 1041.7675                 | 0.2                    | LREQFENK         | [Hex]5[HexNAc]4[Fuc]1[NeuAc]1 |
| 3+ | 1138.7977                  | 1138.7993                 | 1                      | LREQFENK         | [Hex]5[HexNAc]4[Fuc]1[NeuAc]2 |
| 3+ | 1012.4264                  | 1012.4289                 | 2                      | LREQFENK         | [Hex]5[HexNAc]5[Fuc]1         |
| 3+ | 1109.4612                  | 1109.4607                 | 0.5                    | LREQFENK         | [Hex]5[HexNAc]5[Fuc]1[NeuAc]1 |
| 3+ | 1206.4920                  | 1206.4925                 | 0.4                    | LREQFENK         | [Hex]5[HexNAc]5[Fuc]1[NeuAc]2 |
| 3+ | 1080.1197                  | 1080.1220                 | 2                      | LREQFENK         | [Hex]5[HexNAc]6[Fuc]1         |
| 3+ | 1177.1564                  | 1177.1538                 | 2                      | LREQFENK         | [Hex]5[HexNAc]6[Fuc]1[NeuAc]1 |
| 3+ | 1066.4527                  | 1066.4465                 | 6                      | LREQFENK         | [Hex]6[HexNAc]5[Fuc]1         |
| 3+ | 1163.4788                  | 1163.4783                 | 0.4                    | LREQFENK         | [Hex]6[HexNAc]5[Fuc]1[NeuAc]1 |
| 3+ | 1260.5102                  | 1260.5101                 | 0.1                    | LREQFENK         | [Hex]6[HexNAc]5[Fuc]1[NeuAc]2 |
| 3+ | 1134.1414                  | 1134.1396                 | 2                      | LREQFENK         | [Hex]6[HexNAc]6[Fuc]1         |
| 3+ | 1231.1749                  | 1231.1714                 | 3                      | LREQFENK         | [Hex]6[HexNAc]6[Fuc]1[NeuAc]1 |
| 3+ | 1328.2045                  | 1328.2032                 | 1                      | LREQFENK         | [Hex]6[HexNAc]6[Fuc]1[NeuAc]2 |
| 3+ | 1425.2328                  | 1425.2350                 | 2                      | LREQFENK         | [Hex]6[HexNAc]6[Fuc]1[NeuAc]3 |

| CS | Experimental<br><i>m/z</i> | Theoretical<br><i>m/z</i> | Mass<br>Error<br>(ppm) | Peptide Sequence  | Glycan                        |
|----|----------------------------|---------------------------|------------------------|-------------------|-------------------------------|
| 3+ | 1188.1550                  | 1188.1572                 | 2                      | LREQFENK          | [Hex]7[HexNAc]6[Fuc]1         |
| 3+ | 1285.1905                  | 1285.1890                 | 1                      | LREQFENK          | [Hex]7[HexNAc]6[Fuc]1[NeuAc]1 |
| 3+ | 1382.2220                  | 1382.2208                 | 1                      | LREQFENK          | [Hex]7[HexNAc]6[Fuc]1[NeuAc]2 |
| 3+ | 1479.2482                  | 1479.2526                 | 3                      | LREQFENK          | [Hex]7[HexNAc]6[Fuc]1[NeuAc]3 |
| 3+ | 1576.2793                  | 1576.2844                 | 3                      | LREQFENK          | [Hex]7[HexNAc]6[Fuc]1[NeuAc]4 |
| 3+ | 1358.2075                  | 1358.2138                 | 5                      | LREQFENK          | [Hex]8[HexNAc]7[NeuAc]1       |
| 3+ | 1084.7708                  | 1084.7692                 | 1                      | LREQFENK          | [Hex]11[HexNAc]2              |
| 3+ | 1138.7994                  | 1138.7867                 | 13                     | LREQFENK          | [Hex]12[HexNAc]2              |
|    |                            |                           |                        |                   |                               |
| 4+ | 955.8904                   | 955.8910                  | 1                      | LREQFENK          | [Hex]5[HexNAc]6[Fuc]1[NeuAc]2 |
| 4+ | 1018.4071                  | 1018.4082                 | 1                      | LREQFENK          | [Hex]6[HexNAc]5[Fuc]1[NeuAc]3 |
| 4+ | 1200.9769                  | 1200.9743                 | 2                      | LREQFENK          | [Hex]8[HexNAc]7[Fuc]1[NeuAc]3 |
|    |                            |                           |                        |                   |                               |
| 2+ | 532.2806                   | 532.2802                  | 0.8                    | LREQFENK          | non-glycosylated              |
|    |                            |                           |                        |                   |                               |
| 2+ | 892.8872                   | 892.8828                  | 5                      | TIVFNH            | [Hex]4[HexNAc]2               |
| 2+ | 973.9122                   | 973.9092                  | 3                      | TIVFNH            | [Hex]5[HexNAc]2               |
| 2+ | 1054.9376                  | 1054.9356                 | 2                      | TIVFNH            | [Hex]6[HexNAc]2               |
| 2+ | 1135.9670                  | 1135.9620                 | 4                      | TIVFNH            | [Hex]7[HexNAc]2               |
| 2+ | 1216.9940                  | 1216.9884                 | 5                      | TIVFNH            | [Hex]8[HexNAc]2               |
| 2+ | 1298.0230                  | 1298.0148                 | 6                      | TIVFNH            | [Hex]9[HexNAc]2               |
| 2+ | 1379.0547                  | 1379.0412                 | 10                     | TIVFNH            | [Hex]10[HexNAc]2              |
|    |                            |                           |                        |                   |                               |
| 2+ | 1067.4674                  | 1067.4514                 | 15                     | TIVFNH            | [Hex]4[HexNAc]3[Fuc]1         |
|    |                            |                           |                        |                   |                               |
| 2+ | 1021.9813                  | 1021.9753                 | 6                      | TIVFNHSSGGDPEIVMH | [HexNAc]                      |
| 3+ | 730.3439                   | 730.3404                  | 5                      | TIVFNHSSGGDPEIVMH | [HexNAc][Fuc]                 |
| 3+ | 749.3496                   | 749.3476                  | 3                      | TIVFNHSSGGDPEIVMH | [HexNAc]2                     |
| 3+ | 803.3675                   | 803.3652                  | 3                      | TIVFNHSSGGDPEIVMH | [Hex]1[HexNAc]2               |
| 3+ | 857.3825                   | 857.3828                  | 0.3                    | TIVFNHSSGGDPEIVMH | [Hex]2[HexNAc]2               |
| 3+ | 911.4031                   | 911.4004                  | 3                      | TIVFNHSSGGDPEIVMH | [Hex]3[HexNAc]2               |
| 3+ | 979.0989                   | 979.0935                  | 6                      | TIVFNHSSGGDPEIVMH | [Hex]3[HexNAc]3               |
| 3+ | 1046.8011                  | 1046.7866                 | 14                     | TIVFNHSSGGDPEIVMH | [Hex]3[HexNAc]4               |
| 3+ | 1095.4754                  | 1095.4726                 | 3                      | TIVFNHSSGGDPEIVMH | [Hex]3[HexNAc]4[Fuc]1         |
| 3+ | 1163.1782                  | 1163.1658                 | 11                     | TIVFNHSSGGDPEIVMH | [Hex]3[HexNAc]5[Fuc]1         |
| 3+ | 1230.8686                  | 1230.8589                 | 8                      | TIVFNHSSGGDPEIVMH | [Hex]3[HexNAc]6[Fuc]1         |
| 3+ | 965.4219                   | 965.4180                  | 4                      | TIVFNHSSGGDPEIVMH | [Hex]4[HexNAc]2               |
| 3+ | 1033.1165                  | 1033.1111                 | 5                      | TIVFNHSSGGDPEIVMH | [Hex]4[HexNAc]3               |
| 3+ | 1019.4399                  | 1019.4356                 | 4                      | TIVFNHSSGGDPEIVMH | [Hex]5[HexNAc]2               |
| 3+ | 1087.1415                  | 1087.1287                 | 12                     | TIVFNHSSGGDPEIVMH | [Hex]5[HexNAc]3               |
| 3+ | 1073.4582                  | 1073.4532                 | 5                      | TIVFNHSSGGDPEIVMH | [Hex]6[HexNAc]2               |
| 3+ | 1141.1515                  | 1141.1463                 | 5                      | TIVFNHSSGGDPEIVMH | [Hex]6[HexNAc]3               |
| 3+ | 1127.4777                  | 1127.4708                 | 6                      | TIVFNHSSGGDPEIVMH | [Hex]7[HexNAc]2               |
| 3+ | 1181.4949                  | 1181.4884                 | 6                      | TIVFNHSSGGDPEIVMH | [Hex]8[HexNAc]2               |
| 3+ | 1235.5144                  | 1235.5060                 | 7                      | TIVFNHSSGGDPEIVMH | [Hex]9[HexNAc]2               |
| 3+ | 1289.5357                  | 1289.5236                 | 9                      | TIVFNHSSGGDPEIVMH | [Hex]10[HexNAc]2              |
| 3+ | 1343.5352                  | 1343.5413                 | 5                      | TIVFNHSSGGDPEIVMH | [Hex]11[HexNAc]2              |
| 3+ | 1397.5728                  | 1397.5588                 | 10                     | TIVFNHSSGGDPEIVMH | [Hex]12[HexNAc]2              |
|    |                            |                           |                        |                   |                               |
| 2+ | 690.3054                   | 690.304                   | 2                      | NHSSGGDPEIVMH     | non-glycosylated              |

| CS | Experimental<br><i>m/z</i> | Theoretical<br><i>m/z</i> | Mass<br>Error<br>(ppm) | Peptide Sequence     | Glycan                        |
|----|----------------------------|---------------------------|------------------------|----------------------|-------------------------------|
|    |                            |                           |                        |                      |                               |
| 2+ | 962.3859                   | 962.3798                  | 6                      | CNSTQLF              | [Hex]4[HexNAc]2               |
| 2+ | 1043.4100                  | 1043.4061                 | 4                      | CNSTQLF              | [Hex]5[HexNAc]2               |
| 2+ | 1124.4328                  | 1124.4326                 | 0.2                    | CNSTQLF              | [Hex]6[HexNAc]2               |
| 2+ | 1205.4647                  | 1205.4590                 | 5                      | CNSTQLF              | [Hex]7[HexNAc]2               |
| 2+ | 1286.4898                  | 1286.4854                 | 3                      | CNSTQLF              | [Hex]8[HexNAc]2               |
| 2+ | 1367.5195                  | 1367.5118                 | 6                      | CNSTQLF              | [Hex]9[HexNAc]2               |
| 2+ | 1448.5386                  | 1448.5382                 | 0.3                    | CNSTQLF              | [Hex]10[HexNAc]2              |
|    |                            |                           |                        |                      |                               |
| 2+ | 1105.4101                  | 1105.4042                 | 5                      | NSTW                 | [Hex]8[HexNAc]2               |
| 2+ | 1186.4345                  | 1186.4306                 | 3                      | NSTW                 | [Hex]9[HexNAc]2               |
| 2+ | 1267.4458                  | 1267.4570                 | 9                      | NSTW                 | [Hex]10[HexNAc]2              |
|    |                            |                           |                        |                      |                               |
| 3+ | 1438.9246                  | 1438.9111                 | 9                      | NNNTEGSNNTEGNTITLPCR | [Hex]8[HexNAc]4               |
| 3+ | 1709.0153                  | 1708.9992                 | 9                      | NNNTEGSNNTEGNTITLPCR | [Hex]13[HexNAc]4              |
| 3+ | 1763.0326                  | 1763.0168                 | 9                      | NNNTEGSNNTEGNTITLPCR | [Hex]14[HexNAc]4              |
| 3+ | 1871.0691                  | 1871.0520                 | 9                      | NNNTEGSNNTEGNTITLPCR | [Hex]16[HexNAc]4              |
| 3+ | 1925.0874                  | 1925.0696                 | 9                      | NNNTEGSNNTEGNTITLPCR | [Hex]17[HexNAc]4              |
| 3+ | 1979.1041                  | 1979.0872                 | 9                      | NNNTEGSNNTEGNTITLPCR | [Hex]18[HexNAc]4              |
|    |                            |                           |                        |                      |                               |
| 4+ | 1160.4686                  | 1160.4616                 | 6                      | NNNTEGSNNTEGNTITLPCR | [Hex]10[HexNAc]4              |
| 4+ | 1200.9844                  | 1200.9748                 | 8                      | NNNTEGSNNTEGNTITLPCR | [Hex]11[HexNAc]4              |
| 4+ | 1241.4873                  | 1241.4880                 | 1                      | NNNTEGSNNTEGNTITLPCR | [Hex]12[HexNAc]4              |
| 4+ | 1282.0152                  | 1282.0012                 | 11                     | NNNTEGSNNTEGNTITLPCR | [Hex]13[HexNAc]4              |
| 4+ | 1363.0411                  | 1363.0276                 | 10                     | NNNTEGSNNTEGNTITLPCR | [Hex]15[HexNAc]4              |
| 4+ | 1525.0969                  | 1525.0804                 | 11                     | NNNTEGSNNTEGNTITLPCR | [Hex]19[HexNAc]4              |
| 4+ | 1565.6085                  | 1565.5936                 | 10                     | NNNTEGSNNTEGNTITLPCR | [Hex]20[HexNAc]4              |
|    |                            |                           |                        |                      |                               |
| 3+ | 1357.5425                  | 1357.5425                 | 0                      | NNNTEGSNNTEGNTITLPCR | [Hex]9[HexNAc]2               |
| 3+ | 1303.5342                  | 1303.5249                 | 7                      | NNNTEGSNNTEGNTITLPCR | [Hex]8[HexNAc]2               |
|    |                            |                           |                        |                      |                               |
| 4+ | 1376.0672                  | 1376.0568                 | 8                      | NNNTEGSNNTEGNTITLPCR | [Hex]6[HexNAc]10[Fuc]2        |
| 4+ | 1454.3081                  | 1454.3201                 | 8                      | NNNTEGSNNTEGNTITLPCR | [Hex]9[HexNAc]7[Fuc]1[NeuAc]2 |
|    |                            |                           |                        |                      |                               |
| 2+ | 791.3362                   | 791.3322                  | 5                      | CSSNITGL             | [Hex]2[HexNAc]2               |
| 2+ | 872.3638                   | 872.3586                  | 6                      | CSSNITGL             | [Hex]3[HexNAc]2               |
| 2+ | 953.3897                   | 953.3850                  | 5                      | CSSNITGL             | [Hex]4[HexNAc]2               |
| 2+ | 1034.4191                  | 1034.4114                 | 7                      | CSSNITGL             | [Hex]5[HexNAc]2               |
| 2+ | 1115.4467                  | 1115.4378                 | 8                      | CSSNITGL             | [Hex]6[HexNAc]2               |
| 2+ | 1196.4736                  | 1196.4642                 | 8                      | CSSNITGL             | [Hex]7[HexNAc]2               |
| 2+ | 1277.5003                  | 1277.4906                 | 8                      | CSSNITGL             | [Hex]8[HexNAc]2               |
| 2+ | 1358.5286                  | 1358.5170                 | 9                      | CSSNITGL             | [Hex]9[HexNAc]2               |
| 2+ | 1439.5608                  | 1439.5434                 | 12                     | CSSNITGL             | [Hex]10[HexNAc]2              |
|    |                            |                           |                        |                      |                               |
| 2+ | 769.3996                   | 769.3954                  | 5                      | CSSNITGLLLTR         | [HexNAc]                      |
| 2+ | 870.9375                   | 870.9379                  | 0.5                    | CSSNITGLLLTR         | [HexNAc]2                     |
| 2+ | 951.9673                   | 951.9642                  | 3                      | CSSNITGLLLTR         | [Hex]1[HexNAc]2               |
| 2+ | 1032.9956                  | 1032.9907                 | 5                      | CSSNITGLLLTR         | [Hex]2[HexNAc]2               |
| 2+ | 1114.0222                  | 1114.0171                 | 5                      | CSSNITGLLLTR         | [Hex]3[HexNAc]2               |
| 2+ | 1195.0508                  | 1195.0435                 | 6                      | CSSNITGLLLTR         | [Hex]4[HexNAc]2               |

| CS | Experimental <i>m/z</i> | Theoretical <i>m/z</i> | Mass Error (ppm) | Peptide Sequence     | Glycan                        |
|----|-------------------------|------------------------|------------------|----------------------|-------------------------------|
| 2+ | 1276.0763               | 1276.0699              | 5                | CSSNITGLLLTR         | [Hex]5[HexNAc]2               |
| 2+ | 1357.1022               | 1357.0963              | 4                | CSSNITGLLLTR         | [Hex]6[HexNAc]2               |
| 2+ | 1438.1310               | 1438.1227              | 6                | CSSNITGLLLTR         | [Hex]7[HexNAc]2               |
| 2+ | 1519.1581               | 1519.1491              | 6                | CSSNITGLLLTR         | [Hex]8[HexNAc]2               |
| 2+ | 1600.1841               | 1600.1755              | 5                | CSSNITGLLLTR         | [Hex]9[HexNAc]2               |
| 2+ | 1681.2264               | 1681.2019              | 15               | CSSNITGLLLTR         | [Hex]10[HexNAc]2              |
|    |                         |                        |                  |                      |                               |
| 2+ | 667.8651                | 667.8585               | 10               | CSSNITGLLLTR         | non-glycosylated              |
|    |                         |                        |                  |                      |                               |
| 3+ | 958.0488                | 958.0552               | 7                | DGGINENGTEIF         | [Hex]4[HexNAc]4 [Fuc]1        |
| 3+ | 1255.4913               | 1255.4943              | 2                | DGGINENGTEIF         | [Hex]7[HexNAc]6[Fuc]1         |
|    |                         |                        |                  |                      |                               |
| 2+ | 1221.0503               | 1221.0479              | 2                | DGGINENGTEIFRPGGGDMR | [HexNAc][Fuc]                 |
| 2+ | 1776.7375               | 1776.7437              | 3                | DGGINENGTEIFRPGGGDMR | [Hex]4[HexNAc]4               |
| 2+ | 1857.7603               | 1857.7701              | 5                | DGGINENGTEIFRPGGGDMR | [Hex]5[HexNAc]4               |
| 2+ | 1938.7977               | 1938.7965              | 1                | DGGINENGTEIFRPGGGDMR | [Hex]6[HexNAc]4               |
|    |                         |                        |                  |                      |                               |
| 3+ | 765.6845                | 765.6799               | 6                | DGGINENGTEIFRPGGGDMR | [HexNAc]                      |
| 3+ | 833.3737                | 833.3749               | 1                | DGGINENGTEIFRPGGGDMR | [HexNAc]2                     |
| 3+ | 887.3936                | 887.3924               | 1                | DGGINENGTEIFRPGGGDMR | [Hex]1[HexNAc]2               |
| 3+ | 941.4128                | 941.4101               | 3                | DGGINENGTEIFRPGGGDMR | [Hex]2[HexNAc]2               |
| 3+ | 995.4292                | 995.4277               | 2                | DGGINENGTEIFRPGGGDMR | [Hex]3[HexNAc]2               |
| 3+ | 995.4291                | 995.4277               | 1                | DGGINENGTEIFRPGGGDMR | [Hex]3[HexNAc]2               |
| 3+ | 1063.1203               | 1063.1208              | 1                | DGGINENGTEIFRPGGGDMR | [Hex]3[HexNAc]3               |
| 3+ | 1111.8067               | 1111.8068              | 0.1              | DGGINENGTEIFRPGGGDMR | [Hex]3[HexNAc]3[Fuc]1         |
| 3+ | 1179.4995               | 1179.4999              | 0.3              | DGGINENGTEIFRPGGGDMR | [Hex]3[HexNAc]4[Fuc]1         |
| 3+ | 1247.1924               | 1247.1930              | 0.5              | DGGINENGTEIFRPGGGDMR | [Hex]3[HexNAc]5[Fuc]1         |
| 3+ | 1314.8847               | 1314.8862              | 1                | DGGINENGTEIFRPGGGDMR | [Hex]3[HexNAc]6[Fuc]1         |
| 3+ | 1049.4450               | 1049.4453              | 0.3              | DGGINENGTEIFRPGGGDMR | [Hex]4[HexNAc]2               |
| 3+ | 1117.1445               | 1117.1384              | 5                | DGGINENGTEIFRPGGGDMR | [Hex]4[HexNAc]3               |
| 3+ | 1252.5240               | 1252.5247              | 1                | DGGINENGTEIFRPGGGDMR | [Hex]4[HexNAc]5               |
| 3+ | 1301.2091               | 1301.2106              | 1                | DGGINENGTEIFRPGGGDMR | [Hex]4[HexNAc]5[Fuc]1         |
| 3+ | 1398.2396               | 1398.2424              | 2                | DGGINENGTEIFRPGGGDMR | [Hex]4[HexNAc]5[Fuc]1[NeuAc]1 |
| 3+ | 1368.9023               | 1368.9037              | 1                | DGGINENGTEIFRPGGGDMR | [Hex]4[HexNAc]6[Fuc]1         |
| 3+ | 1465.9334               | 1465.9356              | 2                | DGGINENGTEIFRPGGGDMR | [Hex]4[HexNAc]6[Fuc]1[NeuAc]1 |
| 3+ | 1103.4627               | 1103.4629              | 0.2              | DGGINENGTEIFRPGGGDMR | [Hex]5[HexNAc]2               |
| 3+ | 1171.1720               | 1171.1560              | 14               | DGGINENGTEIFRPGGGDMR | [Hex]5[HexNAc]3               |
| 3+ | 1316.8792               | 1316.8738              | 4                | DGGINENGTEIFRPGGGDMR | [Hex]5[HexNAc]3[Fuc]1[NeuAc]1 |
| 3+ | 1287.5406               | 1287.5351              | 4                | DGGINENGTEIFRPGGGDMR | [Hex]5[HexNAc]4[Fuc]1         |
| 3+ | 1384.5802               | 1384.5669              | 10               | DGGINENGTEIFRPGGGDMR | [Hex]5[HexNAc]4[Fuc]1[NeuAc]1 |
| 3+ | 1481.6020               | 1481.5987              | 2                | DGGINENGTEIFRPGGGDMR | [Hex]5[HexNAc]4[Fuc]1[NeuAc]2 |
| 3+ | 1549.2815               | 1549.2918              | 7                | DGGINENGTEIFRPGGGDMR | [Hex]5[HexNAc]5[Fuc]1[NeuAc]2 |
| 3+ | 1422.9216               | 1422.9213              | 0.2              | DGGINENGTEIFRPGGGDMR | [Hex]5[HexNAc]6[Fuc]1         |
| 3+ | 1519.9567               | 1519.9531              | 2                | DGGINENGTEIFRPGGGDMR | [Hex]5[HexNAc]6[Fuc]1[NeuAc]1 |
| 3+ | 1616.9816               | 1616.9850              | 2                | DGGINENGTEIFRPGGGDMR | [Hex]5[HexNAc]6[Fuc]1[NeuAc]2 |
| 3+ | 1157.4804               | 1157.4805              | 0.1              | DGGINENGTEIFRPGGGDMR | [Hex]6[HexNAc]2               |
| 3+ | 1409.2450               | 1409.2458              | 1                | DGGINENGTEIFRPGGGDMR | [Hex]6[HexNAc]5[Fuc]1         |
| 3+ | 1603.3147               | 1603.3094              | 3                | DGGINENGTEIFRPGGGDMR | [Hex]6[HexNAc]5[Fuc]1[NeuAc]2 |
| 3+ | 1211.5045               | 1211.4981              | 5                | DGGINENGTEIFRPGGGDMR | [Hex]7[HexNAc]2               |
| 3+ | 1725.0300               | 1725.0202              | 6                | DGGINENGTEIFRPGGGDMR | [Hex]7[HexNAc]6[Fuc]1[NeuAc]2 |

| CS | Experimental<br><i>m/z</i> | Theoretical<br><i>m/z</i> | Mass<br>Error<br>(ppm) | Peptide Sequence     | Glycan                        |
|----|----------------------------|---------------------------|------------------------|----------------------|-------------------------------|
| 3+ | 1265.5212                  | 1265.5157                 | 4                      | DGGINENGTEIFRPGGGDMR | [Hex]8[HexNAc]2               |
| 3+ | 1319.5383                  | 1319.5333                 | 4                      | DGGINENGTEIFRPGGGDMR | [Hex]9[HexNAc]2               |
| 3+ | 1373.5578                  | 1373.5509                 | 5                      | DGGINENGTEIFRPGGGDMR | [Hex]10[HexNAc]2              |
| 3+ | 1427.5848                  | 1427.5685                 | 11                     | DGGINENGTEIFRPGGGDMR | [Hex]11[HexNAc]2              |
| 3+ | 1481.6020                  | 1481.5861                 | 11                     | DGGINENGTEIFRPGGGDMR | [Hex]12[HexNAc]2              |
|    |                            |                           |                        |                      |                               |
| 4+ | 1275.5085                  | 1275.5077                 | 1                      | DGGINENGTEIFRPGGGDMR | [Hex]6[HexNAc]5[Fuc]1[NeuAc]3 |
| 4+ | 1253.5080                  | 1253.5037                 | 3                      | DGGINENGTEIFRPGGGDMR | [Hex]6[HexNAc]6[Fuc]1[NeuAc]2 |
| 4+ | 1326.2830                  | 1326.2776                 | 4                      | DGGINENGTEIFRPGGGDMR | [Hex]6[HexNAc]6[Fuc]1[NeuAc]3 |
| 4+ | 1221.2447                  | 1221.2431                 | 1                      | DGGINENGTEIFRPGGGDMR | [Hex]7[HexNAc]6[Fuc]1[NeuAc]1 |
| 4+ | 1366.7848                  | 1366.7908                 | 4                      | DGGINENGTEIFRPGGGDMR | [Hex]7[HexNAc]6[Fuc]1[NeuAc]3 |
| 4+ | 1439.5607                  | 1439.5647                 | 3                      | DGGINENGTEIFRPGGGDMR | [Hex]7[HexNAc]6[Fuc]1[NeuAc]4 |
|    |                            |                           |                        |                      |                               |
| 2+ | 1046.4763                  | 1046.4792                 | 3                      | DGGINENGTEIFRPGGGDMR | non-glycosylated              |
|    |                            |                           |                        |                      |                               |
| 3+ | 1211.5173                  | 1211.5199                 | 2                      | LICTTAVPWNASWSNK     | [Hex]6[HexNAc]4               |
| 3+ | 1265.5298                  | 1265.5375                 | 6                      | LICTTAVPWNASWSNK     | [Hex]7[HexNAc]4               |
| 3+ | 1265.5308                  | 1265.5375                 | 5                      | LICTTAVPWNASWSNK     | [Hex]7[HexNAc]4               |
| 3+ | 1319.5566                  | 1319.5551                 | 1                      | LICTTAVPWNASWSNK     | [Hex]8[HexNAc]4               |
| 3+ | 1503.6323                  | 1503.6274                 | 3                      | LICTTAVPWNASWSNK     | [Hex]8[HexNAc]6[Fuc]1         |
| 3+ | 1441.2711                  | 1441.2659                 | 4                      | LICTTAVPWNASWSNK     | [Hex]9[HexNAc]5               |
| 3+ | 1427.5873                  | 1427.5904                 | 2                      | LICTTAVPWNASWSNK     | [Hex]10[HexNAc]4              |
| 3+ | 1495.2910                  | 1495.2835                 | 5                      | LICTTAVPWNASWSNK     | [Hex]10[HexNAc]5              |
| 3+ | 1611.6715                  | 1611.6626                 | 6                      | LICTTAVPWNASWSNK     | [Hex]10[HexNAc]6[Fuc]1        |
| 3+ | 1481.6120                  | 1481.6080                 | 3                      | LICTTAVPWNASWSNK     | [Hex]11[HexNAc]4              |
| 3+ | 1549.3169                  | 1549.3010                 | 10                     | LICTTAVPWNASWSNK     | [Hex]11[HexNAc]5              |
| 3+ | 1535.6298                  | 1535.6256                 | 3                      | LICTTAVPWNASWSNK     | [Hex]12[HexNAc]4              |
| 3+ | 1589.6488                  | 1589.6432                 | 4                      | LICTTAVPWNASWSNK     | [Hex]13[HexNAc]4              |
| 3+ | 1643.6654                  | 1643.6608                 | 3                      | LICTTAVPWNASWSNK     | [Hex]14[HexNAc]4              |
| 3+ | 1711.3673                  | 1711.3539                 | 8                      | LICTTAVPWNASWSNK     | [Hex]14[HexNAc]5              |
| 3+ | 1697.6826                  | 1697.6784                 | 2                      | LICTTAVPWNASWSNK     | [Hex]15[HexNAc]4              |
| 3+ | 1751.6999                  | 1751.6960                 | 2                      | LICTTAVPWNASWSNK     | [Hex]16[HexNAc]4              |
| 3+ | 1887.0752                  | 1887.0822                 | 4                      | LICTTAVPWNASWSNK     | [Hex]16[HexNAc]6              |
| 3+ | 1805.7161                  | 1805.7136                 | 1                      | LICTTAVPWNASWSNK     | [Hex]17[HexNAc]4              |
| 3+ | 1859.7336                  | 1859.7312                 | 1                      | LICTTAVPWNASWSNK     | [Hex]18[HexNAc]4              |
| 3+ | 1913.7522                  | 1913.7488                 | 2                      | LICTTAVPWNASWSNK     | [Hex]19[HexNAc]4              |
| 3+ | 1967.7690                  | 1967.7664                 | 1                      | LICTTAVPWNASWSNK     | [Hex]20[HexNAc]4              |
| 3+ | 1597.9807                  | 1597.9870                 | 4                      | LICTTAVPWNASWSNK     | [Hex]11[HexNAc]5[Fuc]1        |
| 3+ | 1603.3315                  | 1603.3187                 | 8                      | LICTTAVPWNASWSNK     | [Hex]12[HexNAc]5              |
|    |                            |                           |                        |                      |                               |
| 4+ | 868.3716                   | 868.3786                  | 8                      | LICTTAVPWNASWSNK     | [Hex]5[HexNAc]4               |
| 4+ | 1030.4332                  | 1030.4314                 | 2                      | LICTTAVPWNASWSNK     | [Hex]9[HexNAc]4               |
| 4+ | 1334.5210                  | 1334.5371                 | 12                     | LICTTAVPWNASWSNK     | [Hex]14[HexNAc]6              |
| 4+ | 1516.5936                  | 1516.5898                 | 3                      | LICTTAVPWNASWSNK     | [Hex]21[HexNAc]4              |
|    |                            |                           |                        |                      |                               |
| 2+ | 1026.0015                  | 1025.9960                 | 5                      | LICTTAVPWNASWSNK     | [HexNAc]                      |
| 2+ | 1127.5468                  | 1127.5385                 | 7                      | LICTTAVPWNASWSNK     | [HexNAc]2                     |
| 2+ | 1208.5676                  | 1208.5648                 | 2                      | LICTTAVPWNASWSNK     | [Hex]1[HexNAc]2               |
| 2+ | 1370.6119                  | 1370.6177                 | 4                      | LICTTAVPWNASWSNK     | [Hex]3[HexNAc]2               |
| 2+ | 1748.2603                  | 1748.2657                 | 3                      | LICTTAVPWNASWSNK     | [Hex]3[HexNAc]5[Fuc]1         |



| CS | Experimental<br><i>m/z</i> | Theoretical<br><i>m/z</i> | Mass<br>Error<br>(ppm) | Peptide Sequence  | Glycan                        |
|----|----------------------------|---------------------------|------------------------|-------------------|-------------------------------|
| 2+ | 1532.6719                  | 1532.6705                 | 1                      | LICTTAVPWNASWSNK  | [Hex]5[HexNAc]2               |
| 2+ | 1613.7033                  | 1613.6969                 | 4                      | LICTTAVPWNASWSNK  | [Hex]6[HexNAc]2               |
| 2+ | 1694.7285                  | 1694.7233                 | 3                      | LICTTAVPWNASWSNK  | [Hex]7[HexNAc]2               |
| 2+ | 1775.7513                  | 1775.7497                 | 1                      | LICTTAVPWNASWSNK  | [Hex]8[HexNAc]2               |
| 2+ | 1856.7817                  | 1856.7761                 | 3                      | LICTTAVPWNASWSNK  | [Hex]9[HexNAc]2               |
| 2+ | 1937.8000                  | 1937.8025                 | 1                      | LICTTAVPWNASWSNK  | [Hex]10[HexNAc]2              |
|    |                            |                           |                        |                   |                               |
| 3+ | 1030.4728                  | 1030.4600                 | 12                     | LICTTAVPWNASWSNK  | [Hex]3[HexNAc]3[Fuc]1         |
| 3+ | 860.0666                   | 860.0633                  | 4                      | LICTTAVPWNASWSNK  | [Hex]2[HexNAc]2               |
| 3+ | 1049.4708                  | 1049.4671                 | 4                      | LICTTAVPWNASWSNK  | [Hex]3[HexNAc]4               |
| 3+ | 1098.1586                  | 1098.1531                 | 5                      | LICTTAVPWNASWSNK  | [Hex]3[HexNAc]4[Fuc]1         |
| 3+ | 968.0998                   | 968.0985                  | 1                      | LICTTAVPWNASWSNK  | [Hex]4[HexNAc]2               |
| 3+ | 1035.7941                  | 1035.7916                 | 2                      | LICTTAVPWNASWSNK  | [Hex]4[HexNAc]3               |
| 3+ | 1089.8093                  | 1089.8092                 | 0.1                    | LICTTAVPWNASWSNK  | [Hex]5[HexNAc]3               |
| 3+ | 1143.8346                  | 1143.8268                 | 7                      | LICTTAVPWNASWSNK  | [Hex]6[HexNAc]3               |
| 3+ | 1346.2244                  | 1346.2217                 | 2                      | LICTTAVPWNASWSNK  | [Hex]11[HexNAc]2              |
| 3+ | 1400.2306                  | 1400.2393                 | 6                      | LICTTAVPWNASWSNK  | [Hex]12[HexNAc]2              |
|    |                            |                           |                        |                   |                               |
| 3+ | 1200.5220                  | 1200.5165                 | 5                      | LICTTAVPWNASWSNK* | [Hex]4[HexNAc]4[NeuAc]1       |
| 3+ | 1370.9090                  | 1370.9132                 | 3                      | LICTTAVPWNASWSNK* | [Hex]5[HexNAc]5[Fuc]1[NeuAc]1 |
| 3+ | 1303.2203                  | 1303.2201                 | 0.2                    | LICTTAVPWNASWSNK* | [Hex]5[HexNAc]4[Fuc]1[NeuAc]1 |
|    |                            |                           |                        |                   |                               |
| 2+ | 782.8114                   | 782.8089                  | 3                      | SNK               | [Hex]5[HexNAc]2               |
| 2+ | 701.7839                   | 701.7826                  | 2                      | SNK               | [Hex]4[HexNAc]2               |
| 2+ | 795.3275                   | 795.3248                  | 3                      | SNK               | [Hex]3[HexNAc]3[Fuc]1         |
| 2+ | 863.8377                   | 863.8354                  | 3                      | SNK               | [Hex]6[HexNAc]2               |
| 2+ | 896.8675                   | 896.8644                  | 3                      | SNK               | [Hex]3[HexNAc]4[Fuc]1         |
| 2+ | 944.8651                   | 944.8618                  | 3                      | SNK               | [Hex]7[HexNAc]2               |
| 2+ | 998.4087                   | 998.4042                  | 5                      | SNK               | [Hex]3[HexNAc]5[Fuc]1         |
| 2+ | 1025.8950                  | 1025.8882                 | 7                      | SNK               | [Hex]8[HexNAc]2               |
| 2+ | 1106.9183                  | 1106.9146                 | 3                      | SNK               | [Hex]9[HexNAc]2               |
| 2+ | 1187.9450                  | 1187.9410                 | 3                      | SNK               | [Hex]10[HexNAc]2              |
| 2+ | 1349.9965                  | 1349.9938                 | 2                      | SNK               | [Hex]12[HexNAc]2              |
|    |                            |                           |                        |                   |                               |
| 2+ | 949.9161                   | 949.9109                  | 5                      | IWNNMTWMEWER      | [HexNAc]                      |
| 2+ | 1051.4546                  | 1051.4534                 | 1                      | IWNNMTWMEWER      | [HexNAc]2                     |
| 2+ | 1132.4833                  | 1132.4797                 | 3                      | IWNNMTWMEWER      | [Hex]1[HexNAc]2               |
| 2+ | 1213.5112                  | 1213.5062                 | 4                      | IWNNMTWMEWER      | [Hex]2[HexNAc]2               |
| 2+ | 1294.5394                  | 1294.5326                 | 5                      | IWNNMTWMEWER      | [Hex]3[HexNAc]2               |
| 2+ | 1396.0785                  | 1396.0723                 | 4                      | IWNNMTWMEWER      | [Hex]3[HexNAc]3               |
| 2+ | 1469.1007                  | 1469.1012                 | 0.3                    | IWNNMTWMEWER      | [Hex]3[HexNAc]3[Fuc]1         |
| 2+ | 1570.6443                  | 1570.6409                 | 2                      | IWNNMTWMEWER      | [Hex]3[HexNAc]4[Fuc]1         |
| 2+ | 1672.1806                  | 1672.1806                 | 0                      | IWNNMTWMEWER      | [Hex]3[HexNAc]5[Fuc]1         |
| 2+ | 1375.5653                  | 1375.5590                 | 5                      | IWNNMTWMEWER      | [Hex]4[HexNAc]2               |
| 2+ | 1732.6985                  | 1732.6937                 | 3                      | IWNNMTWMEWER      | [Hex]5[HexNAc]4[Fuc]1         |
| 2+ | 1537.6166                  | 1537.6118                 | 3                      | IWNNMTWMEWER      | [Hex]6[HexNAc]2               |
| 2+ | 1699.6662                  | 1699.6646                 | 1                      | IWNNMTWMEWER      | [Hex]8[HexNAc]2               |
| 2+ | 1861.7206                  | 1861.7174                 | 2                      | IWNNMTWMEWER      | [Hex]10[HexNAc]2              |
| 2+ | 1942.7570                  | 1942.7439                 | 7                      | IWNNMTWMEWER      | [Hex]11[HexNAc]2              |
|    |                            |                           |                        |                   |                               |

| CS                            | Experimental<br><i>m/z</i> | Theoretical<br><i>m/z</i> | Mass<br>Error<br>(ppm) | Peptide Sequence       | Glycan                        |
|-------------------------------|----------------------------|---------------------------|------------------------|------------------------|-------------------------------|
| 3+                            | 1182.8151                  | 1182.8160                 | 1                      | IWNNMTWMEWER           | [Hex]3[HexNAc]6[Fuc]1         |
| 3+                            | 1052.7574                  | 1052.7613                 | 4                      | IWNNMTWMEWER           | [Hex]4[HexNAc]4               |
| 3+                            | 1101.4416                  | 1101.4473                 | 5                      | IWNNMTWMEWER           | [Hex]4[HexNAc]4 [Fuc]1        |
| 3+                            | 1198.4891                  | 1198.4791                 | 8                      | IWNNMTWMEWER           | [Hex]4[HexNAc]4[Fuc]1[NeuAc]1 |
| 3+                            | 1169.1471                  | 1169.1404                 | 6                      | IWNNMTWMEWER           | [Hex]4[HexNAc]5[Fuc]1         |
| 3+                            | 1236.8273                  | 1236.8335                 | 5                      | IWNNMTWMEWER           | [Hex]4[HexNAc]6[Fuc]1         |
| 3+                            | 971.3949                   | 971.3927                  | 2                      | IWNNMTWMEWER           | [Hex]5[HexNAc]2               |
| 3+                            | 1252.4987                  | 1252.4967                 | 2                      | IWNNMTWMEWER           | [Hex]5[HexNAc]4[Fuc]1[NeuAc]1 |
| 3+                            | 1349.5402                  | 1349.5285                 | 9                      | IWNNMTWMEWER           | [Hex]5[HexNAc]4[Fuc]1[NeuAc]2 |
| 3+                            | 1223.1518                  | 1223.1580                 | 5                      | IWNNMTWMEWER           | [Hex]5[HexNAc]5[Fuc]1         |
| 3+                            | 1290.8542                  | 1290.8511                 | 2                      | IWNNMTWMEWER           | [Hex]5[HexNAc]6[Fuc]1         |
| 3+                            | 1277.1653                  | 1277.1756                 | 8                      | IWNNMTWMEWER           | [Hex]6[HexNAc]5[Fuc]1         |
| 3+                            | 1374.1932                  | 1374.2074                 | 10                     | IWNNMTWMEWER           | [Hex]6[HexNAc]5[Fuc]1[NeuAc]1 |
| 3+                            | 1079.4318                  | 1079.4279                 | 4                      | IWNNMTWMEWER           | [Hex]7[HexNAc]2               |
| 3+                            | 1187.4850                  | 1187.4631                 | 18                     | IWNNMTWMEWER           | [Hex]9[HexNAc]2               |
|                               |                            |                           |                        |                        |                               |
| 3+                            | 1081.4779                  | 1081.4876                 | 9                      | EIDNYTSEIYTLIEESQNQQEK | [Hex]1[HexNAc]2               |
| 3+                            | 1135.5104                  | 1135.5052                 | 5                      | EIDNYTSEIYTLIEESQNQQEK | [Hex]2[HexNAc]2               |
| 3+                            | 1373.6005                  | 1373.5950                 | 4                      | EIDNYTSEIYTLIEESQNQQEK | [Hex]3[HexNAc]4[Fuc]1         |
| 3+                            | 1441.2893                  | 1441.2882                 | 1                      | EIDNYTSEIYTLIEESQNQQEK | [Hex]3[HexNAc]5[Fuc]1         |
| 3+                            | 1508.9761                  | 1508.9813                 | 3                      | EIDNYTSEIYTLIEESQNQQEK | [Hex]3[HexNAc]6[Fuc]1         |
| 3+                            | 1508.9761                  | 1508.9813                 | 3                      | EIDNYTSEIYTLIEESQNQQEK | [Hex]3[HexNAc]6[Fuc]1         |
| 3+                            | 1297.5618                  | 1297.5580                 | 3                      | EIDNYTSEIYTLIEESQNQQEK | [Hex]5[HexNAc]2               |
| 3+                            | 1351.5797                  | 1351.5756                 | 3                      | EIDNYTSEIYTLIEESQNQQEK | [Hex]6[HexNAc]2               |
| 3+                            | 1405.5960                  | 1405.5932                 | 2                      | EIDNYTSEIYTLIEESQNQQEK | [Hex]7[HexNAc]2               |
| 3+                            | 1459.6148                  | 1459.6108                 | 3                      | EIDNYTSEIYTLIEESQNQQEK | [Hex]8[HexNAc]2               |
| 3+                            | 1513.6316                  | 1513.6284                 | 2                      | EIDNYTSEIYTLIEESQNQQEK | [Hex]9[HexNAc]2               |
| 3+                            | 1567.6495                  | 1567.6460                 | 2                      | EIDNYTSEIYTLIEESQNQQEK | [Hex]10[HexNAc]2              |
| 3+                            | 1621.6736                  | 1621.6637                 | 6                      | EIDNYTSEIYTLIEESQNQQEK | [Hex]11[HexNAc]2              |
|                               |                            |                           |                        |                        |                               |
| <b>O-linked glycopeptides</b> |                            |                           |                        |                        |                               |
| 2+                            | 614.3441                   | 614.3452                  | 2                      | IEPLGVAPTK             | [HexNAc]1                     |
| 2+                            | 695.3751                   | 695.3716                  | 5                      | IEPLGVAPTK             | [Hex]1[HexNAc]1               |
| 2+                            | 840.9229                   | 840.9193                  | 4                      | IEPLGVAPTK             | [Hex]1[HexNAc]1[NeuAc]1       |
| 2+                            | 986.4726                   | 986.4670                  | 6                      | IEPLGVAPTK             | [Hex]1[HexNAc]1[NeuAc]2       |
|                               |                            |                           |                        |                        |                               |
| 2+                            | 512.8078                   | 512.8055                  | 4                      | IEPLGVAPTK             | non-glycosylated              |
|                               |                            |                           |                        |                        |                               |
| 1+                            | 947.4703                   | 947.4654                  | 5                      | ICTTAVPW               | non-glycosylated              |
|                               |                            |                           |                        |                        |                               |
| 2+                            | 632.3221                   | 632.3181                  | 6                      | LICTTAVPW              | [HexNAc]1                     |
| 2+                            | 858.8932                   | 858.8922                  | 1                      | LICTTAVPW              | [Hex]1[HexNAc]1[NeuAc]1       |
| 2+                            | 1004.4425                  | 1004.4399                 | 3                      | LICTTAVPW              | [Hex]1[HexNAc]1[NeuAc]2       |
|                               |                            |                           |                        |                        |                               |
| 1+                            | 1060.5571                  | 1060.5495                 | 7                      | LICTTAVPW              | non-glycosylated              |

CS denotes charge state

Glycopeptides with asterisks (\*) were obtained from Endo-H reaction

**Table S3. N- and O-linked glycopeptide compositions of soluble gp140ΔCF**

| CS | Experimental m/z | Theoretical m/z | Mass Error (ppm) | Peptide Sequence                      | Glycan                        |
|----|------------------|-----------------|------------------|---------------------------------------|-------------------------------|
| 4+ | 790.1205         | 790.1206        | 0.1              | ACVPTDNPQEVVLENVTEHFNMWK              | [HexNAc]                      |
| 3+ | 1282.9067        | 1282.9043       | 2                | ACVPTDNPQEVVLENVTEHFNMWK              | [Hex]3[HexNAc]2               |
| 3+ | 1350.5922        | 1350.5974       | 4                | ACVPTDNPQEVVLENVTEHFNMWK              | [Hex]3[HexNAc]3               |
| 3+ | 1534.6701        | 1534.6696       | 0.3              | ACVPTDNPQEVVLENVTEHFNMWK              | [Hex]3[HexNAc]5[Fuc]1         |
| 3+ | 1602.3686        | 1602.3628       | 4                | ACVPTDNPQEVVLENVTEHFNMWK              | [Hex]3[HexNAc]6[Fuc]1         |
| 3+ | 1739.7375        | 1739.7366       | 1                | ACVPTDNPQEVVLENVTEHFNMWK              | [Hex]5[HexNAc]5[Fuc]1[NeuAc]1 |
| 4+ | 1163.0039        | 1163.0014       | 2                | ACVPTDNPQEVVLENVTEHFNMWK              | [Hex]4[HexNAc]3[Fuc]1[NeuAc]1 |
| 4+ | 1337.3054        | 1337.3150       | 7                | ACVPTDNPQEVVLENVTEHFNMWK              | [Hex]4[HexNAc]5[Fuc]1[NeuAc]2 |
| 4+ | 1315.3160        | 1315.3110       | 4                | ACVPTDNPQEVVLENVTEHFNMWK              | [Hex]4[HexNAc]6[Fuc]1[NeuAc]1 |
| 4+ | 1327.0560        | 1327.0583       | 2                | ACVPTDNPQEVVLENVTEHFNMWK              | [Hex]5[HexNAc]4[Fuc]1[NeuAc]2 |
| 4+ | 1377.8324        | 1377.8282       | 3                | ACVPTDNPQEVVLENVTEHFNMWK              | [Hex]5[HexNAc]5[Fuc]1[NeuAc]2 |
| 4+ | 1428.5981        | 1428.5980       | 0.1              | ACVPTDNPQEVVLENVTEHFNMWK              | [Hex]5[HexNAc]6[Fuc]1[NeuAc]2 |
| 4+ | 1491.1167        | 1491.1152       | 1                | ACVPTDNPQEVVLENVTEHFNMWK              | [Hex]6[HexNAc]5[Fuc]1[NeuAc]3 |
| 4+ | 1364.0748        | 1364.0767       | 1                | ACVPTDNPQEVVLENVTEHFNMWK              | [Hex]7[HexNAc]6[Fuc]1         |
| 4+ | 1509.6231        | 1509.6244       | 1                | ACVPTDNPQEVVLENVTEHFNMWK              | [Hex]7[HexNAc]6[Fuc]1[NeuAc]2 |
| 4+ | 1582.3869        | 1582.3983       | 7                | ACVPTDNPQEVVLENVTEHFNMWK              | [Hex]7[HexNAc]6[Fuc]1[NeuAc]3 |
| 4+ | 1655.1760        | 1655.1721       | 2                | ACVPTDNPQEVVLENVTEHFNMWK              | [Hex]7[HexNAc]6[Fuc]1[NeuAc]4 |
| 4+ | 1436.8632        | 1436.8506       | 9                | ACVPTDNPQEVVLENVTEHFNMWK              | [Hex]7[HexNAc]6[Fuc]1[NeuAc]1 |
| 5+ | 1233.7074        | 1233.7095       | 2                | ACVPTDNPQEVVLENVTEHFNMWK              | [Hex]6[HexNAc]6[Fuc]1[NeuAc]3 |
| 4+ | 1635.2012        | 1635.2043       | 2                | AYDTEVHNVWATHACVPTDNPQEVVLENVTEHFNMWK | [Hex]5[HexNAc]4[Fuc]1[NeuAc]1 |
| 5+ | 1144.7079        | 1144.7080       | 0.1              | AYDTEVHNVWATHACVPTDNPQEVVLENVTEHFNMWK | [Hex]3[HexNAc]3[Fuc]1         |
| 5+ | 1185.3266        | 1185.3247       | 2                | AYDTEVHNVWATHACVPTDNPQEVVLENVTEHFNMWK | [Hex]3[HexNAc]4[Fuc]1         |
| 5+ | 1217.7355        | 1217.7352       | 0.2              | AYDTEVHNVWATHACVPTDNPQEVVLENVTEHFNMWK | [Hex]4[HexNAc]4[Fuc]1         |
| 5+ | 1107.2969        | 1107.2919       | 5                | AYDTEVHNVWATHACVPTDNPQEVVLENVTEHFNMWK | [Hex]4[HexNAc]2               |
| 5+ | 1275.9562        | 1275.9543       | 1                | AYDTEVHNVWATHACVPTDNPQEVVLENVTEHFNMWK | [Hex]4[HexNAc]4[Fuc]1[NeuAc]1 |
| 5+ | 1258.3482        | 1258.3511       | 2                | AYDTEVHNVWATHACVPTDNPQEVVLENVTEHFNMWK | [Hex]4[HexNAc]5[Fuc]1         |
| 5+ | 1316.5724        | 1316.5702       | 2                | AYDTEVHNVWATHACVPTDNPQEVVLENVTEHFNMWK | [Hex]4[HexNAc]5[Fuc]1[NeuAc]1 |
| 5+ | 1139.7029        | 1139.7025       | 0.4              | AYDTEVHNVWATHACVPTDNPQEVVLENVTEHFNMWK | [Hex]5[HexNAc]2               |
| 5+ | 1250.1490        | 1250.1458       | 3                | AYDTEVHNVWATHACVPTDNPQEVVLENVTEHFNMWK | [Hex]5[HexNAc]4[Fuc]1         |
| 5+ | 1290.7741        | 1290.7617       | 10               | AYDTEVHNVWATHACVPTDNPQEVVLENVTEHFNMWK | [Hex]5[HexNAc]5[Fuc]1         |
| 5+ | 1172.1060        | 1172.1130       | 6                | AYDTEVHNVWATHACVPTDNPQEVVLENVTEHFNMWK | [Hex]6[HexNAc]2               |
| 5+ | 1323.1729        | 1323.1722       | 1                | AYDTEVHNVWATHACVPTDNPQEVVLENVTEHFNMWK | [Hex]6[HexNAc]5[Fuc]1         |
| 5+ | 1439.6134        | 1439.6104       | 2                | AYDTEVHNVWATHACVPTDNPQEVVLENVTEHFNMWK | [Hex]6[HexNAc]5[Fuc]1[NeuAc]2 |
| 5+ | 1220.5163        | 1220.5168       | 0.4              | AYDTEVHNVWATHACVPTDNPQEVVLENVTEHFNMWK | [Hex]7[HexNAc]2[PO3]1         |
| 6+ | 1151.3272        | 1151.3273       | 0.1              | AYDTEVHNVWATHACVPTDNPQEVVLENVTEHFNMWK | [Hex]6[HexNAc]5[Fuc]1[NeuAc]1 |
| 6+ | 1267.5244        | 1267.5363       | 9                | AYDTEVHNVWATHACVPTDNPQEVVLENVTEHFNMWK | [Hex]6[HexNAc]7[Fuc]1[NeuAc]2 |
| 3+ | 985.4689         | 985.4652        | 4                | ACVPTDNPQEVVLENVTEHFNMWK              | non-glycosylated              |
| 2+ | 1029.4329        | 1029.4319       | 1                | DVNATNTTNDSEGTMER                     | [HexNAc]                      |
| 3+ | 1378.8745        | 1378.8737       | 1                | DVNATNTTNDSEGTMER                     | [Hex]6[HexNAc]5[Fuc]2         |

| CS | Experimental<br><i>m/z</i> | Theoretical<br><i>m/z</i> | Mass<br>Error<br>(ppm) | Peptide Sequence  | Glycan                        |
|----|----------------------------|---------------------------|------------------------|-------------------|-------------------------------|
| 3+ | 1446.5614                  | 1446.5669                 | 4                      | DVNATNTTNDSEGTMER | [Hex]6[HexNAc]6[Fuc]2         |
| 3+ | 1267.8334                  | 1267.8263                 | 6                      | DVNATNTTNDSEGTMER | [Hex]7[HexNAc]4               |
| 3+ | 1559.9293                  | 1559.9337                 | 3                      | DVNATNTTNDSEGTMER | [Hex]9[HexNAc]6[Fuc]1         |
| 3+ | 1429.8897                  | 1429.8791                 | 7                      | DVNATNTTNDSEGTMER | [Hex]10[HexNAc]4              |
|    |                            |                           |                        |                   |                               |
| 3+ | 1183.8018                  | 1183.7981                 | 3                      | DVNATNTTNDSEGTMER | [Hex]4[HexNAc]3[Fuc]1[NeuAc]1 |
| 3+ | 1319.1895                  | 1319.1844                 | 4                      | DVNATNTTNDSEGTMER | [Hex]4[HexNAc]5[Fuc]1[NeuAc]1 |
| 3+ | 1305.5214                  | 1305.5088                 | 10                     | DVNATNTTNDSEGTMER | [Hex]5[HexNAc]4[Fuc]1[NeuAc]1 |
| 3+ | 1470.2403                  | 1470.2338                 | 4                      | DVNATNTTNDSEGTMER | [Hex]5[HexNAc]5[Fuc]1[NeuAc]2 |
| 3+ | 1621.2871                  | 1621.2832                 | 2                      | DVNATNTTNDSEGTMER | [Hex]6[HexNAc]5[Fuc]1[NeuAc]3 |
|    |                            |                           |                        |                   |                               |
| 4+ | 938.8701                   | 938.8702                  | 0.1                    | DVNATNTTNDSEGTMER | [Hex]4[HexNAc]4[Fuc]1[NeuAc]1 |
|    |                            |                           |                        |                   |                               |
| 2+ | 1374.0523                  | 1374.0508                 | 1                      | DVNATNTTNDSEGTMER | [Hex]3[HexNAc]2               |
| 2+ | 1731.1912                  | 1731.1855                 | 3                      | DVNATNTTNDSEGTMER | [Hex]4[HexNAc]4 [Fuc]1        |
| 2+ | 1536.1019                  | 1536.1036                 | 1                      | DVNATNTTNDSEGTMER | [Hex]5[HexNAc]2               |
|    |                            |                           |                        |                   |                               |
| 3+ | 1032.7483                  | 1032.7487                 | 0.4                    | DVNATNTTNDSEGTMER | [Hex]3[HexNAc]3[Fuc]1         |
| 3+ | 1100.4460                  | 1100.4418                 | 4                      | DVNATNTTNDSEGTMER | [Hex]3[HexNAc]4[Fuc]1         |
| 3+ | 1168.1294                  | 1168.1350                 | 5                      | DVNATNTTNDSEGTMER | [Hex]3[HexNAc]5[Fuc]1         |
| 3+ | 970.3804                   | 970.3872                  | 7                      | DVNATNTTNDSEGTMER | [Hex]4[HexNAc]2               |
| 3+ | 1222.1625                  | 1222.1525                 | 8                      | DVNATNTTNDSEGTMER | [Hex]4[HexNAc]5[Fuc]1         |
| 3+ | 1319.1927                  | 1319.1844                 | 6                      | DVNATNTTNDSEGTMER | [Hex]4[HexNAc]5[Fuc]1[NeuAc]1 |
| 3+ | 1402.5403                  | 1402.5406                 | 0.2                    | DVNATNTTNDSEGTMER | [Hex]5[HexNAc]4[Fuc]1[NeuAc]2 |
| 3+ | 1276.1684                  | 1276.1702                 | 1                      | DVNATNTTNDSEGTMER | [Hex]5[HexNAc]5[Fuc]1         |
| 3+ | 1373.2049                  | 1373.2019                 | 2                      | DVNATNTTNDSEGTMER | [Hex]5[HexNAc]5[Fuc]1[NeuAc]1 |
| 3+ | 1330.2016                  | 1330.1877                 | 10                     | DVNATNTTNDSEGTMER | [Hex]6[HexNAc]5[Fuc]1         |
|    |                            |                           |                        |                   |                               |
| 2+ | 927.8974                   | 927.8922                  | 6                      | DVNATNTTNDSEGTMER | non-glycosylated              |
|    |                            |                           |                        |                   |                               |
| 2+ | 710.2597                   | 710.2582                  | 2                      | NCSF              | [Hex]3[HexNAc]2               |
| 2+ | 811.8005                   | 811.7979                  | 3                      | NCSF              | [Hex]3[HexNAc]3               |
| 2+ | 884.8284                   | 884.8268                  | 2                      | NCSF              | [Hex]3[HexNAc]3[Fuc]1         |
| 2+ | 913.3371                   | 913.3375                  | 0.4                    | NCSF              | [Hex]3[HexNAc]4               |
| 2+ | 986.3661                   | 986.3665                  | 0.4                    | NCSF              | [Hex]3[HexNAc]4[Fuc]1         |
| 2+ | 1087.9079                  | 1087.9062                 | 2                      | NCSF              | [Hex]3[HexNAc]5[Fuc]1         |
| 2+ | 791.2872                   | 791.2846                  | 3                      | NCSF              | [Hex]4[HexNAc]2               |
| 2+ | 892.8276                   | 892.8243                  | 4                      | NCSF              | [Hex]4[HexNAc]3               |
| 2+ | 1111.4040                  | 1111.4009                 | 3                      | NCSF              | [Hex]4[HexNAc]3[Fuc]1[NeuAc]1 |
| 2+ | 1038.3771                  | 1038.3720                 | 5                      | NCSF              | [Hex]4[HexNAc]3[NeuAc]1       |
| 2+ | 994.3691                   | 994.3640                  | 5                      | NCSF              | [Hex]4[HexNAc]4               |
| 2+ | 1067.3931                  | 1067.3929                 | 0.2                    | NCSF              | [Hex]4[HexNAc]4 [Fuc]1        |
| 2+ | 1212.9426                  | 1212.9406                 | 2                      | NCSF              | [Hex]4[HexNAc]4[Fuc]1[NeuAc]1 |
| 2+ | 1139.9148                  | 1139.9117                 | 3                      | NCSF              | [Hex]4[HexNAc]4[NeuAc]1       |
| 2+ | 1168.9296                  | 1168.9326                 | 3                      | NCSF              | [Hex]4[HexNAc]5[Fuc]1         |
| 2+ | 1314.4830                  | 1314.4803                 | 2                      | NCSF              | [Hex]4[HexNAc]5[Fuc]1[NeuAc]1 |
| 2+ | 872.3135                   | 872.3110                  | 3                      | NCSF              | [Hex]5[HexNAc]2               |
| 2+ | 973.8486                   | 973.8507                  | 2                      | NCSF              | [Hex]5[HexNAc]3               |
| 2+ | 1148.4201                  | 1148.4193                 | 1                      | NCSF              | [Hex]5[HexNAc]4[Fuc]1         |
| 2+ | 1293.9688                  | 1293.9670                 | 1                      | NCSF              | [Hex]5[HexNAc]4[Fuc]1[NeuAc]1 |

| CS | Experimental<br><i>m/z</i> | Theoretical<br><i>m/z</i> | Mass<br>Error<br>(ppm) | Peptide Sequence | Glycan                        |
|----|----------------------------|---------------------------|------------------------|------------------|-------------------------------|
| 2+ | 1439.5226                  | 1439.5147                 | 5                      | NCSF             | [Hex]5[HexNAc]4[Fuc]1[NeuAc]2 |
| 2+ | 1541.0613                  | 1541.0544                 | 4                      | NCSF             | [Hex]5[HexNAc]5[Fuc]1[NeuAc]2 |
| 2+ | 953.3382                   | 953.3374                  | 1                      | NCSF             | [Hex]6[HexNAc]2               |
| 2+ | 1034.3621                  | 1034.3638                 | 2                      | NCSF             | [Hex]7[HexNAc]2               |
| 2+ | 1115.3969                  | 1115.3902                 | 6                      | NCSF             | [Hex]8[HexNAc]2               |
|    |                            |                           |                        |                  |                               |
| 3+ | 1095.3989                  | 1095.3985                 | 0.4                    | NCSF             | [Hex]5[HexNAc]6[Fuc]1[NeuAc]2 |
| 3+ | 1081.7329                  | 1081.7230                 | 9                      | NCSF             | [Hex]6[HexNAc]5[Fuc]1[NeuAc]2 |
|    |                            |                           |                        |                  |                               |
| 1+ | 527.1928                   | 527.1918                  | 2                      | NCSF             | non-glycosylated              |
|    |                            |                           |                        |                  |                               |
| 2+ | 504.2728                   | 504.2721                  | 1                      | NITTSIR          | [HexNAc]                      |
| 2+ | 577.3029                   | 577.3010                  | 3                      | NITTSIR          | [HexNAc][Fuc]                 |
| 2+ | 767.8677                   | 767.8646                  | 4                      | NITTSIR          | [Hex]2[HexNAc]2               |
| 2+ | 840.8962                   | 840.8935                  | 3                      | NITTSIR          | [Hex]2[HexNAc]2[Fuc]1         |
| 2+ | 848.8901                   | 848.8910                  | 1                      | NITTSIR          | [Hex]3[HexNAc]2               |
| 2+ | 921.9231                   | 921.9199                  | 3                      | NITTSIR          | [Hex]3[HexNAc]2[Fuc]1         |
| 2+ | 950.4314                   | 950.4307                  | 1                      | NITTSIR          | [Hex]3[HexNAc]3               |
| 2+ | 1023.4608                  | 1023.4596                 | 1                      | NITTSIR          | [Hex]3[HexNAc]3[Fuc]1         |
| 2+ | 1051.9736                  | 1051.9703                 | 3                      | NITTSIR          | [Hex]3[HexNAc]4               |
| 2+ | 1125.0009                  | 1124.9993                 | 1                      | NITTSIR          | [Hex]3[HexNAc]4[Fuc]1         |
| 2+ | 1226.5416                  | 1226.5390                 | 2                      | NITTSIR          | [Hex]3[HexNAc]5[Fuc]1         |
| 2+ | 929.9176                   | 929.9174                  | 0.2                    | NITTSIR          | [Hex]4[HexNAc]2               |
| 2+ | 1031.4556                  | 1031.4571                 | 1                      | NITTSIR          | [Hex]4[HexNAc]3               |
| 2+ | 1104.4865                  | 1104.4860                 | 0.5                    | NITTSIR          | [Hex]4[HexNAc]3[Fuc]1         |
| 2+ | 1250.0355                  | 1250.0337                 | 1                      | NITTSIR          | [Hex]4[HexNAc]3[Fuc]1[NeuAc]1 |
| 2+ | 1132.9962                  | 1132.9968                 | 1                      | NITTSIR          | [Hex]4[HexNAc]4               |
| 2+ | 1206.0274                  | 1206.0257                 | 1                      | NITTSIR          | [Hex]4[HexNAc]4 [Fuc]1        |
| 2+ | 1351.5751                  | 1351.5734                 | 1                      | NITTSIR          | [Hex]4[HexNAc]4[Fuc]1[NeuAc]1 |
| 2+ | 1278.5470                  | 1278.5445                 | 2                      | NITTSIR          | [Hex]4[HexNAc]4[NeuAc]1       |
| 2+ | 1307.5714                  | 1307.5654                 | 5                      | NITTSIR          | [Hex]4[HexNAc]5[Fuc]1         |
| 2+ | 1453.1148                  | 1453.1131                 | 1                      | NITTSIR          | [Hex]4[HexNAc]5[Fuc]1[NeuAc]1 |
| 2+ | 1010.9445                  | 1010.9438                 | 1                      | NITTSIR          | [Hex]5[HexNAc]2               |
| 2+ | 1331.0601                  | 1331.0601                 | 0                      | NITTSIR          | [Hex]5[HexNAc]3[Fuc]1[NeuAc]1 |
| 2+ | 1432.6002                  | 1432.5998                 | 0.3                    | NITTSIR          | [Hex]5[HexNAc]4[Fuc]1[NeuAc]1 |
| 2+ | 1578.1482                  | 1578.1475                 | 0.4                    | NITTSIR          | [Hex]5[HexNAc]4[Fuc]1[NeuAc]2 |
| 2+ | 1091.9738                  | 1091.9702                 | 3                      | NITTSIR          | [Hex]6[HexNAc]2               |
| 2+ | 1131.9583                  | 1131.9533                 | 4                      | NITTSIR          | [Hex]6[HexNAc]2[PO3]1         |
| 2+ | 1193.5109                  | 1193.5099                 | 1                      | NITTSIR          | [Hex]6[HexNAc]3               |
| 2+ | 1396.5833                  | 1396.5893                 | 4                      | NITTSIR          | [Hex]6[HexNAc]5               |
| 2+ | 1469.6188                  | 1469.6182                 | 0.4                    | NITTSIR          | [Hex]6[HexNAc]5[Fuc]1         |
| 2+ | 1172.9986                  | 1172.9966                 | 2                      | NITTSIR          | [Hex]7[HexNAc]2               |
| 2+ | 1212.9850                  | 1212.9797                 | 4                      | NITTSIR          | [Hex]7[HexNAc]2[PO3]1         |
| 2+ | 1254.0246                  | 1254.0230                 | 1                      | NITTSIR          | [Hex]8[HexNAc]2               |
| 2+ | 1335.0487                  | 1335.0494                 | 1                      | NITTSIR          | [Hex]9[HexNAc]2               |
|    |                            |                           |                        |                  |                               |
| 3+ | 885.7268                   | 885.7216                  | 6                      | NITTSIR          | [Hex]3[HexNAc]6[Fuc]1         |
| 3+ | 1036.7682                  | 1036.7710                 | 3                      | NITTSIR          | [Hex]4[HexNAc]6[Fuc]1[NeuAc]1 |
| 3+ | 839.0230                   | 839.0232                  | 0.2                    | NITTSIR          | [Hex]5[HexNAc]3 [NeuAc]1      |
| 3+ | 858.3707                   | 858.3705                  | 0.2                    | NITTSIR          | [Hex]5[HexNAc]4[Fuc]1         |

| CS | Experimental<br><i>m/z</i> | Theoretical<br><i>m/z</i> | Mass<br>Error<br>(ppm) | Peptide Sequence | Glycan                        |
|----|----------------------------|---------------------------|------------------------|------------------|-------------------------------|
| 3+ | 926.0626                   | 926.0636                  | 1                      | NITTSIR          | [Hex]5[HexNAc]5[Fuc]1         |
| 3+ | 1023.1007                  | 1023.0954                 | 5                      | NITTSIR          | [Hex]5[HexNAc]5[Fuc]1[NeuAc]1 |
| 3+ | 1120.1286                  | 1120.1272                 | 1                      | NITTSIR          | [Hex]5[HexNAc]5[Fuc]1[NeuAc]2 |
| 3+ | 1090.7858                  | 1090.7885                 | 2                      | NITTSIR          | [Hex]5[HexNAc]6[Fuc]1[NeuAc]1 |
| 3+ | 893.0365                   | 893.0408                  | 5                      | NITTSIR          | [Hex]6[HexNAc]3[NeuAc]1       |
| 3+ | 1077.1166                  | 1077.1130                 | 3                      | NITTSIR          | [Hex]6[HexNAc]5[Fuc]1[NeuAc]1 |
| 3+ | 1174.1470                  | 1174.1448                 | 2                      | NITTSIR          | [Hex]6[HexNAc]5[Fuc]1[NeuAc]2 |
| 3+ | 1271.1731                  | 1271.1766                 | 3                      | NITTSIR          | [Hex]6[HexNAc]5[Fuc]1[NeuAc]3 |
| 3+ | 1241.8386                  | 1241.8380                 | 0.5                    | NITTSIR          | [Hex]6[HexNAc]6[Fuc]1[NeuAc]2 |
| 3+ | 1338.8736                  | 1338.8698                 | 3                      | NITTSIR          | [Hex]6[HexNAc]6[Fuc]1[NeuAc]3 |
| 3+ | 1101.7976                  | 1101.7920                 | 5                      | NITTSIR          | [Hex]7[HexNAc]6[Fuc]1         |
| 3+ | 1198.8263                  | 1198.8238                 | 2                      | NITTSIR          | [Hex]7[HexNAc]6[Fuc]1[NeuAc]1 |
|    |                            |                           |                        |                  |                               |
| 2+ | 758.3601                   | 758.3590                  | 1                      | NCSFNITTSIR      | [HexNAc]                      |
| 2+ | 859.9008                   | 859.8987                  | 2                      | NCSFNITTSIR      | [HexNAc]2                     |
|    |                            |                           |                        |                  |                               |
| 2+ | 1204.5174                  | 1204.5176                 | 0.2                    | NCSFNITTSIR      | [Hex]3[HexNAc]3               |
| 2+ | 1277.5478                  | 1277.5466                 | 1                      | NCSFNITTSIR      | [Hex]3[HexNAc]3[Fuc]1         |
| 2+ | 1306.0578                  | 1306.0573                 | 0.4                    | NCSFNITTSIR      | [Hex]3[HexNAc]4               |
| 2+ | 1379.0908                  | 1379.0862                 | 3                      | NCSFNITTSIR      | [Hex]3[HexNAc]4[Fuc]1         |
| 2+ | 1480.6268                  | 1480.6260                 | 1                      | NCSFNITTSIR      | [Hex]3[HexNAc]5[Fuc]1         |
| 2+ | 1184.0068                  | 1184.0044                 | 2                      | NCSFNITTSIR      | [Hex]4[HexNAc]2               |
| 2+ | 1285.5448                  | 1285.5440                 | 1                      | NCSFNITTSIR      | [Hex]4[HexNAc]3               |
| 2+ | 1358.5730                  | 1358.5730                 | 0                      | NCSFNITTSIR      | [Hex]4[HexNAc]3[Fuc]1         |
| 2+ | 1504.1135                  | 1504.1207                 | 5                      | NCSFNITTSIR      | [Hex]4[HexNAc]3[Fuc]1[NeuAc]1 |
| 2+ | 1460.1102                  | 1460.1127                 | 2                      | NCSFNITTSIR      | [Hex]4[HexNAc]4 [Fuc]1        |
| 2+ | 1605.6608                  | 1605.6604                 | 0.2                    | NCSFNITTSIR      | [Hex]4[HexNAc]4[Fuc]1[NeuAc]1 |
| 2+ | 1561.6571                  | 1561.6523                 | 3                      | NCSFNITTSIR      | [Hex]4[HexNAc]5[Fuc]1         |
| 2+ | 1265.0325                  | 1265.0307                 | 1                      | NCSFNITTSIR      | [Hex]5[HexNAc]2               |
| 2+ | 1366.5810                  | 1366.5704                 | 8                      | NCSFNITTSIR      | [Hex]5[HexNAc]3               |
| 2+ | 1439.6039                  | 1439.5994                 | 3                      | NCSFNITTSIR      | [Hex]5[HexNAc]3[Fuc]1         |
| 2+ | 1541.1362                  | 1541.1391                 | 2                      | NCSFNITTSIR      | [Hex]5[HexNAc]4[Fuc]1         |
| 2+ | 1686.6864                  | 1686.6868                 | 0.2                    | NCSFNITTSIR      | [Hex]5[HexNAc]4[Fuc]1[NeuAc]1 |
| 2+ | 1642.6717                  | 1642.6788                 | 4                      | NCSFNITTSIR      | [Hex]5[HexNAc]5[Fuc]1         |
| 2+ | 1346.0559                  | 1346.0572                 | 1                      | NCSFNITTSIR      | [Hex]6[HexNAc]2               |
| 2+ | 1427.0806                  | 1427.0836                 | 2                      | NCSFNITTSIR      | [Hex]7[HexNAc]2               |
| 2+ | 1508.0968                  | 1508.1100                 | 9                      | NCSFNITTSIR      | [Hex]8[HexNAc]2               |
|    |                            |                           |                        |                  |                               |
| 3+ | 735.6561                   | 735.6544                  | 2                      | NCSFNITTSIR      | [Hex]3[HexNAc]2               |
| 3+ | 1138.4695                  | 1138.4691                 | 0.4                    | NCSFNITTSIR      | [Hex]4[HexNAc]5[Fuc]1[NeuAc]1 |
| 3+ | 1235.5083                  | 1235.5009                 | 6                      | NCSFNITTSIR      | [Hex]4[HexNAc]5[Fuc]1[NeuAc]2 |
| 3+ | 870.3454                   | 870.3450                  | 0.5                    | NCSFNITTSIR      | [Hex]5[HexNAc]2[PO3]1         |
| 3+ | 1221.8292                  | 1221.8254                 | 3                      | NCSFNITTSIR      | [Hex]5[HexNAc]4[Fuc]1[NeuAc]2 |
| 3+ | 1192.4899                  | 1192.4867                 | 3                      | NCSFNITTSIR      | [Hex]5[HexNAc]5[Fuc]1[NeuAc]1 |
| 3+ | 1289.5179                  | 1289.5185                 | 0.4                    | NCSFNITTSIR      | [Hex]5[HexNAc]5[Fuc]1[NeuAc]2 |
| 3+ | 1343.5429                  | 1343.5361                 | 5                      | NCSFNITTSIR      | [Hex]6[HexNAc]5[Fuc]1[NeuAc]2 |
| 3+ | 1440.5663                  | 1440.5679                 | 1                      | NCSFNITTSIR      | [Hex]6[HexNAc]5[Fuc]1[NeuAc]3 |
| 3+ | 1368.2261                  | 1368.2151                 | 8                      | NCSFNITTSIR      | [Hex]7[HexNAc]6[Fuc]1[NeuAc]1 |
| 3+ | 1465.2575                  | 1465.2469                 | 7                      | NCSFNITTSIR      | [Hex]7[HexNAc]6[Fuc]1[NeuAc]2 |
|    |                            |                           |                        |                  |                               |



| CS | Experimental<br><i>m/z</i> | Theoretical<br><i>m/z</i> | Mass<br>Error<br>(ppm) | Peptide Sequence | Glycan                        |
|----|----------------------------|---------------------------|------------------------|------------------|-------------------------------|
| 3+ | 438.2177                   | 438.2153                  | 5                      | NCSFNITTSIR      | non-glycosylated              |
| 2+ | 911.9443                   | 911.9445                  | 0.2                    | LDVVPIDNNNTSYR   | [HexNAc]                      |
| 2+ | 1277.0810                  | 1277.0767                 | 3                      | LDVVPIDNNNTSYR   | [Hex]2[HexNAc]3               |
| 2+ | 1358.1045                  | 1358.1031                 | 1                      | LDVVPIDNNNTSYR   | [Hex]3[HexNAc]3               |
| 2+ | 1431.1343                  | 1431.1321                 | 2                      | LDVVPIDNNNTSYR   | [Hex]3[HexNAc]3[Fuc]1         |
| 2+ | 1459.6385                  | 1459.6428                 | 3                      | LDVVPIDNNNTSYR   | [Hex]3[HexNAc]4               |
| 2+ | 1532.6733                  | 1532.6717                 | 1                      | LDVVPIDNNNTSYR   | [Hex]3[HexNAc]4[Fuc]1         |
| 2+ | 1634.2134                  | 1634.2115                 | 1                      | LDVVPIDNNNTSYR   | [Hex]3[HexNAc]5[Fuc]1         |
| 2+ | 1337.5877                  | 1337.5899                 | 2                      | LDVVPIDNNNTSYR   | [Hex]4[HexNAc]2               |
| 2+ | 1512.1664                  | 1512.1585                 | 5                      | LDVVPIDNNNTSYR   | [Hex]4[HexNAc]3[Fuc]1         |
| 2+ | 1657.7067                  | 1657.7062                 | 0.3                    | LDVVPIDNNNTSYR   | [Hex]4[HexNAc]3[Fuc]1[NeuAc]1 |
| 2+ | 1613.6997                  | 1613.6982                 | 1                      | LDVVPIDNNNTSYR   | [Hex]4[HexNAc]4 [Fuc]1        |
| 2+ | 1759.2473                  | 1759.2458                 | 1                      | LDVVPIDNNNTSYR   | [Hex]4[HexNAc]4[Fuc]1[NeuAc]1 |
| 2+ | 1418.6174                  | 1418.6162                 | 1                      | LDVVPIDNNNTSYR   | [Hex]5[HexNAc]2               |
| 2+ | 1593.1796                  | 1593.1849                 | 3                      | LDVVPIDNNNTSYR   | [Hex]5[HexNAc]3[Fuc]1         |
| 2+ | 1840.2707                  | 1840.2723                 | 1                      | LDVVPIDNNNTSYR   | [Hex]5[HexNAc]4[Fuc]1[NeuAc]1 |
| 2+ | 1985.8176                  | 1985.8200                 | 1                      | LDVVPIDNNNTSYR   | [Hex]5[HexNAc]4[Fuc]1[NeuAc]2 |
| 2+ | 1499.6429                  | 1499.6427                 | 0.1                    | LDVVPIDNNNTSYR   | [Hex]6[HexNAc]2               |
| 2+ | 1580.6687                  | 1580.6691                 | 0.3                    | LDVVPIDNNNTSYR   | [Hex]7[HexNAc]2               |
| 3+ | 838.0437                   | 838.0447                  | 1                      | LDVVPIDNNNTSYR   | [Hex]3[HexNAc]2               |
| 3+ | 1070.4658                  | 1070.4628                 | 3                      | LDVVPIDNNNTSYR   | [Hex]3[HexNAc]4[NeuAc]1       |
| 3+ | 1157.5044                  | 1157.5032                 | 1                      | LDVVPIDNNNTSYR   | [Hex]3[HexNAc]6[Fuc]1         |
| 3+ | 959.7532                   | 959.7554                  | 2                      | LDVVPIDNNNTSYR   | [Hex]4[HexNAc]3               |
| 3+ | 1027.4517                  | 1027.4486                 | 3                      | LDVVPIDNNNTSYR   | [Hex]4[HexNAc]4               |
| 3+ | 1143.8310                  | 1143.8276                 | 3                      | LDVVPIDNNNTSYR   | [Hex]4[HexNAc]5[Fuc]1         |
| 3+ | 1240.8576                  | 1240.8595                 | 2                      | LDVVPIDNNNTSYR   | [Hex]4[HexNAc]5[Fuc]1[NeuAc]1 |
| 3+ | 1211.5132                  | 1211.5208                 | 6                      | LDVVPIDNNNTSYR   | [Hex]4[HexNAc]6[Fuc]1         |
| 3+ | 1308.5575                  | 1308.5526                 | 4                      | LDVVPIDNNNTSYR   | [Hex]4[HexNAc]6[Fuc]1[NeuAc]1 |
| 3+ | 1159.4971                  | 1159.4908                 | 5                      | LDVVPIDNNNTSYR   | [Hex]5[HexNAc]3[Fuc]1[NeuAc]1 |
| 3+ | 1081.4731                  | 1081.4662                 | 6                      | LDVVPIDNNNTSYR   | [Hex]5[HexNAc]4               |
| 3+ | 1130.1493                  | 1130.1521                 | 2                      | LDVVPIDNNNTSYR   | [Hex]5[HexNAc]4[Fuc]1         |
| 3+ | 1178.4967                  | 1178.4979                 | 1                      | LDVVPIDNNNTSYR   | [Hex]5[HexNAc]4[NeuAc]1       |
| 3+ | 1275.5339                  | 1275.5298                 | 3                      | LDVVPIDNNNTSYR   | [Hex]5[HexNAc]4[NeuAc]2       |
| 3+ | 1197.8445                  | 1197.8453                 | 1                      | LDVVPIDNNNTSYR   | [Hex]5[HexNAc]5[Fuc]1         |
| 3+ | 1294.8781                  | 1294.8771                 | 1                      | LDVVPIDNNNTSYR   | [Hex]5[HexNAc]5[Fuc]1[NeuAc]1 |
| 3+ | 1391.9117                  | 1391.9089                 | 2                      | LDVVPIDNNNTSYR   | [Hex]5[HexNAc]5[Fuc]1[NeuAc]2 |
| 3+ | 1362.5712                  | 1362.5702                 | 1                      | LDVVPIDNNNTSYR   | [Hex]5[HexNAc]6[Fuc]1[NeuAc]1 |
| 3+ | 1459.6113                  | 1459.6020                 | 6                      | LDVVPIDNNNTSYR   | [Hex]5[HexNAc]6[Fuc]1[NeuAc]2 |
| 3+ | 1116.4727                  | 1116.4766                 | 3                      | LDVVPIDNNNTSYR   | [Hex]6[HexNAc]3[Fuc]1         |
| 3+ | 1213.5101                  | 1213.5084                 | 1                      | LDVVPIDNNNTSYR   | [Hex]6[HexNAc]3[Fuc]1[NeuAc]1 |
| 3+ | 1203.1789                  | 1203.1769                 | 2                      | LDVVPIDNNNTSYR   | [Hex]6[HexNAc]5               |
| 3+ | 1251.8673                  | 1251.8629                 | 4                      | LDVVPIDNNNTSYR   | [Hex]6[HexNAc]5[Fuc]1         |
| 3+ | 1348.8901                  | 1348.8947                 | 3                      | LDVVPIDNNNTSYR   | [Hex]6[HexNAc]5[Fuc]1[NeuAc]1 |
| 3+ | 1445.9265                  | 1445.9265                 | 0                      | LDVVPIDNNNTSYR   | [Hex]6[HexNAc]5[Fuc]1[NeuAc]2 |
| 3+ | 1542.9597                  | 1542.9583                 | 1                      | LDVVPIDNNNTSYR   | [Hex]6[HexNAc]5[Fuc]1[NeuAc]3 |
| 3+ | 1300.2075                  | 1300.2087                 | 1                      | LDVVPIDNNNTSYR   | [Hex]6[HexNAc]5[NeuAc]1       |
| 3+ | 1319.5509                  | 1319.5560                 | 4                      | LDVVPIDNNNTSYR   | [Hex]6[HexNAc]6[Fuc]1         |
| 3+ | 1416.5859                  | 1416.5878                 | 1                      | LDVVPIDNNNTSYR   | [Hex]6[HexNAc]6[Fuc]1[NeuAc]1 |

| CS | Experimental<br><i>m/z</i> | Theoretical<br><i>m/z</i> | Mass<br>Error<br>(ppm) | Peptide Sequence | Glycan                        |
|----|----------------------------|---------------------------|------------------------|------------------|-------------------------------|
| 3+ | 1513.6162                  | 1513.6196                 | 2                      | LDVVPIDNNNTSYR   | [Hex]6[HexNAc]6[Fuc]1[NeuAc]2 |
| 3+ | 1610.6474                  | 1610.6514                 | 2                      | LDVVPIDNNNTSYR   | [Hex]6[HexNAc]6[Fuc]1[NeuAc]3 |
| 3+ | 1373.5733                  | 1373.5736                 | 0.2                    | LDVVPIDNNNTSYR   | [Hex]7[HexNAc]6[Fuc]1         |
| 3+ | 1470.5995                  | 1470.6054                 | 4                      | LDVVPIDNNNTSYR   | [Hex]7[HexNAc]6[Fuc]1[NeuAc]1 |
| 3+ | 1567.6292                  | 1567.6372                 | 5                      | LDVVPIDNNNTSYR   | [Hex]7[HexNAc]6[Fuc]1[NeuAc]2 |
| 3+ | 1664.6724                  | 1664.6690                 | 2                      | LDVVPIDNNNTSYR   | [Hex]7[HexNAc]6[Fuc]1[NeuAc]3 |
| 3+ | 1108.1289                  | 1108.1327                 | 3                      | LDVVPIDNNNTSYR   | [Hex]8[HexNAc]2               |
| 3+ | 1162.1523                  | 1162.1503                 | 2                      | LDVVPIDNNNTSYR   | [Hex]9[HexNAc]2               |
|    |                            |                           |                        |                  |                               |
| 4+ | 1321.5261                  | 1321.5274                 | 1                      | LDVVPIDNNNTSYR   | [Hex]7[HexNAc]6[Fuc]1[NeuAc]4 |
|    |                            |                           |                        |                  |                               |
| 2+ | 810.4052                   | 810.4048                  | 0.5                    | LDVVPIDNNNTSYR   | non-glycosylated              |
|    |                            |                           |                        |                  |                               |
| 2+ | 624.7798                   | 624.7799                  | 0.2                    | NVSTVQCTH        | [HexNAc]                      |
| 2+ | 1347.0486                  | 1347.0468                 | 1                      | NVSTVQCTH        | [Hex]3[HexNAc]5[Fuc]1         |
| 2+ | 1224.9902                  | 1224.9938                 | 3                      | NVSTVQCTH        | [Hex]4[HexNAc]3[Fuc]1         |
| 2+ | 1370.5398                  | 1370.5415                 | 1                      | NVSTVQCTH        | [Hex]4[HexNAc]3[Fuc]1[NeuAc]1 |
| 2+ | 1326.5333                  | 1326.5335                 | 0.2                    | NVSTVQCTH        | [Hex]4[HexNAc]4 [Fuc]1        |
| 2+ | 1472.0811                  | 1472.0812                 | 0.1                    | NVSTVQCTH        | [Hex]4[HexNAc]4[Fuc]1[NeuAc]1 |
| 2+ | 1529.6131                  | 1529.6129                 | 0.1                    | NVSTVQCTH        | [Hex]4[HexNAc]6[Fuc]1         |
| 2+ | 1334.5311                  | 1334.5310                 | 0.1                    | NVSTVQCTH        | [Hex]5[HexNAc]4               |
| 2+ | 1480.0833                  | 1480.0787                 | 3                      | NVSTVQCTH        | [Hex]5[HexNAc]4[NeuAc]1       |
| 2+ | 1610.6388                  | 1610.6393                 | 0.3                    | NVSTVQCTH        | [Hex]5[HexNAc]6[Fuc]1         |
| 2+ | 1756.1868                  | 1756.1870                 | 0.1                    | NVSTVQCTH        | [Hex]5[HexNAc]6[Fuc]1[NeuAc]1 |
| 2+ | 1901.7285                  | 1901.7347                 | 3                      | NVSTVQCTH        | [Hex]5[HexNAc]6[Fuc]1[NeuAc]2 |
| 2+ | 1212.4815                  | 1212.4780                 | 3                      | NVSTVQCTH        | [Hex]6[HexNAc]2               |
|    |                            |                           |                        |                  |                               |
| 2+ | 1307.0725                  | 1307.0708                 | 1                      | NVSTVQCTHGIR     | [Hex]3[HexNAc]3[Fuc]1         |
| 2+ | 1335.5832                  | 1335.5815                 | 1                      | NVSTVQCTHGIR     | [Hex]3[HexNAc]4               |
| 2+ | 1408.6128                  | 1408.6104                 | 2                      | NVSTVQCTHGIR     | [Hex]3[HexNAc]4[Fuc]1         |
| 2+ | 1460.6178                  | 1460.6159                 | 1                      | NVSTVQCTHGIR     | [Hex]4[HexNAc]3[NeuAc]1       |
| 2+ | 1416.6054                  | 1416.6079                 | 2                      | NVSTVQCTHGIR     | [Hex]4[HexNAc]4               |
| 2+ | 1736.7185                  | 1736.7243                 | 3                      | NVSTVQCTHGIR     | [Hex]4[HexNAc]5[Fuc]1[NeuAc]1 |
| 2+ | 1294.5574                  | 1294.5549                 | 2                      | NVSTVQCTHGIR     | [Hex]5[HexNAc]2               |
| 2+ | 1469.1237                  | 1469.1236                 | 0.1                    | NVSTVQCTHGIR     | [Hex]5[HexNAc]3[Fuc]1         |
| 2+ | 1716.2128                  | 1716.2110                 | 1                      | NVSTVQCTHGIR     | [Hex]5[HexNAc]4[Fuc]1[NeuAc]1 |
| 2+ | 1477.1294                  | 1477.1210                 | 6                      | NVSTVQCTHGIR     | [Hex]6[HexNAc]3               |
| 2+ | 1622.6668                  | 1622.6687                 | 1                      | NVSTVQCTHGIR     | [Hex]6[HexNAc]3[NeuAc]1       |
| 2+ | 1456.6099                  | 1456.6078                 | 1                      | NVSTVQCTHGIR     | [Hex]7[HexNAc]2               |
| 2+ | 1537.6327                  | 1537.6342                 | 1                      | NVSTVQCTHGIR     | [Hex]8[HexNAc]2               |
|    |                            |                           |                        |                  |                               |
| 3+ | 755.3382                   | 755.3372                  | 1                      | NVSTVQCTHGIR     | [Hex]3[HexNAc]2               |
| 3+ | 823.0321                   | 823.0303                  | 2                      | NVSTVQCTHGIR     | [Hex]3[HexNAc]3               |
| 3+ | 809.3546                   | 809.3548                  | 0.2                    | NVSTVQCTHGIR     | [Hex]4[HexNAc]2               |
| 3+ | 877.0510                   | 877.0479                  | 4                      | NVSTVQCTHGIR     | [Hex]4[HexNAc]3               |
| 3+ | 1061.1198                  | 1061.1201                 | 0.3                    | NVSTVQCTHGIR     | [Hex]4[HexNAc]5[Fuc]1         |
| 3+ | 1095.7961                  | 1095.7904                 | 5                      | NVSTVQCTHGIR     | [Hex]5 [HexNAc]4 [NeuAc]1     |
| 3+ | 931.0647                   | 931.0655                  | 1                      | NVSTVQCTHGIR     | [Hex]5[HexNAc]3               |
| 3+ | 1028.0987                  | 1028.0973                 | 1                      | NVSTVQCTHGIR     | [Hex]5[HexNAc]3[NeuAc]1       |
| 3+ | 1076.7863                  | 1076.7832                 | 3                      | NVSTVQCTHGIR     | [Hex]5[HexNAc]3[Fuc]1[NeuAc]1 |

| CS | Experimental<br><i>m/z</i> | Theoretical<br><i>m/z</i> | Mass<br>Error<br>(ppm) | Peptide Sequence | Glycan                        |
|----|----------------------------|---------------------------|------------------------|------------------|-------------------------------|
| 3+ | 1047.4422                  | 1047.4446                 | 2                      | NVSTVQCTHGIR     | [Hex]5[HexNAc]4[Fuc]1         |
| 3+ | 1241.5099                  | 1241.5082                 | 1                      | NVSTVQCTHGIR     | [Hex]5[HexNAc]4[Fuc]1[NeuAc]2 |
| 3+ | 1033.7750                  | 1033.7690                 | 6                      | NVSTVQCTHGIR     | [Hex]6[HexNAc]3[Fuc]1         |
| 3+ | 1130.8050                  | 1130.8009                 | 4                      | NVSTVQCTHGIR     | [Hex]6[HexNAc]3[Fuc]1[NeuAc]1 |
| 3+ | 1169.1594                  | 1169.1553                 | 4                      | NVSTVQCTHGIR     | [Hex]6[HexNAc]5[Fuc]1         |
| 3+ | 1266.1887                  | 1266.1871                 | 1                      | NVSTVQCTHGIR     | [Hex]6[HexNAc]5[Fuc]1[NeuAc]1 |
| 3+ | 1363.2214                  | 1363.2189                 | 2                      | NVSTVQCTHGIR     | [Hex]6[HexNAc]5[Fuc]1[NeuAc]2 |
| 3+ | 1460.2513                  | 1460.2507                 | 0.4                    | NVSTVQCTHGIR     | [Hex]6[HexNAc]5[Fuc]1[NeuAc]3 |
| 3+ | 1236.8401                  | 1236.8485                 | 7                      | NVSTVQCTHGIR     | [Hex]6[HexNAc]6[Fuc]1         |
| 3+ | 1079.4431                  | 1079.4428                 | 0.3                    | NVSTVQCTHGIR     | [Hex]9[HexNAc]2               |
|    |                            |                           |                        |                  |                               |
| 2+ | 523.2410                   | 523.2402                  | 2                      | NVSTVQCTH        | non-glycosylated              |
|    |                            |                           |                        |                  |                               |
| 2+ | 872.9728                   | 872.9700                  | 3                      | LLNGSLAEEEVVIR   | [HexNAc]                      |
| 2+ | 946.0023                   | 945.9989                  | 4                      | LLNGSLAEEEVVIR   | [HexNAc][Fuc]                 |
| 2+ | 1136.5646                  | 1136.5625                 | 2                      | LLNGSLAEEEVVIR   | [Hex]2[HexNAc]2               |
| 2+ | 1217.5924                  | 1217.5889                 | 3                      | LLNGSLAEEEVVIR   | [Hex]3[HexNAc]2               |
| 2+ | 1319.1302                  | 1319.1286                 | 1                      | LLNGSLAEEEVVIR   | [Hex]3[HexNAc]3               |
| 2+ | 1392.1595                  | 1392.1576                 | 1                      | LLNGSLAEEEVVIR   | [Hex]3[HexNAc]3[Fuc]1         |
| 2+ | 1420.6724                  | 1420.6683                 | 3                      | LLNGSLAEEEVVIR   | [Hex]3[HexNAc]4               |
| 2+ | 1493.6962                  | 1493.6972                 | 1                      | LLNGSLAEEEVVIR   | [Hex]3[HexNAc]4[Fuc]1         |
| 2+ | 1595.2383                  | 1595.2370                 | 1                      | LLNGSLAEEEVVIR   | [Hex]3[HexNAc]5[Fuc]1         |
| 2+ | 1298.6151                  | 1298.6154                 | 0.2                    | LLNGSLAEEEVVIR   | [Hex]4[HexNAc]2               |
| 2+ | 1400.1613                  | 1400.1550                 | 4                      | LLNGSLAEEEVVIR   | [Hex]4[HexNAc]3               |
| 2+ | 1720.2705                  | 1720.2714                 | 1                      | LLNGSLAEEEVVIR   | [Hex]4[HexNAc]4[Fuc]1[NeuAc]1 |
| 2+ | 1379.6412                  | 1379.6417                 | 0.4                    | LLNGSLAEEEVVIR   | [Hex]5[HexNAc]2               |
| 2+ | 1655.7573                  | 1655.7501                 | 4                      | LLNGSLAEEEVVIR   | [Hex]5[HexNAc]4[Fuc]1         |
| 2+ | 1460.6696                  | 1460.6682                 | 1                      | LLNGSLAEEEVVIR   | [Hex]6[HexNAc]2               |
| 2+ | 1541.6965                  | 1541.6946                 | 1                      | LLNGSLAEEEVVIR   | [Hex]7[HexNAc]2               |
| 2+ | 1622.7221                  | 1622.7210                 | 1                      | LLNGSLAEEEVVIR   | [Hex]8[HexNAc]2               |
| 2+ | 1703.7491                  | 1703.7474                 | 1                      | LLNGSLAEEEVVIR   | [Hex]9[HexNAc]2               |
|    |                            |                           |                        |                  |                               |
| 3+ | 982.4617                   | 982.4584                  | 3                      | LLNGSLAEEEVVIR   | [Hex]4[HexNAc]3[Fuc]1         |
| 3+ | 1079.4944                  | 1079.4902                 | 4                      | LLNGSLAEEEVVIR   | [Hex]4[HexNAc]3[Fuc]1[NeuAc]1 |
| 3+ | 1050.1517                  | 1050.1515                 | 0.2                    | LLNGSLAEEEVVIR   | [Hex]4[HexNAc]4[Fuc]1         |
| 3+ | 1117.8431                  | 1117.8446                 | 1                      | LLNGSLAEEEVVIR   | [Hex]4[HexNAc]5[Fuc]1         |
| 3+ | 1214.8788                  | 1214.8765                 | 2                      | LLNGSLAEEEVVIR   | [Hex]4[HexNAc]5[Fuc]1[NeuAc]1 |
| 3+ | 1185.5404                  | 1185.5378                 | 2                      | LLNGSLAEEEVVIR   | [Hex]4[HexNAc]6[Fuc]1         |
| 3+ | 1036.4806                  | 1036.4760                 | 4                      | LLNGSLAEEEVVIR   | [Hex]5[HexNAc]3[Fuc]1         |
| 3+ | 1201.2037                  | 1201.2009                 | 2                      | LLNGSLAEEEVVIR   | [Hex]5[HexNAc]4[Fuc]1[NeuAc]1 |
| 3+ | 1298.2350                  | 1298.2327                 | 2                      | LLNGSLAEEEVVIR   | [Hex]5[HexNAc]4[Fuc]1[NeuAc]2 |
| 3+ | 1171.8566                  | 1171.8623                 | 5                      | LLNGSLAEEEVVIR   | [Hex]5[HexNAc]5[Fuc]1         |
| 3+ | 1268.8910                  | 1268.8941                 | 2                      | LLNGSLAEEEVVIR   | [Hex]5[HexNAc]5[Fuc]1[NeuAc]1 |
| 3+ | 1365.9262                  | 1365.9259                 | 0.2                    | LLNGSLAEEEVVIR   | [Hex]5[HexNAc]5[Fuc]1[NeuAc]2 |
| 3+ | 1433.6280                  | 1433.6190                 | 6                      | LLNGSLAEEEVVIR   | [Hex]5[HexNAc]6[Fuc]1[NeuAc]2 |
| 3+ | 1225.8804                  | 1225.8799                 | 0.4                    | LLNGSLAEEEVVIR   | [Hex]6[HexNAc]5[Fuc]1         |
| 3+ | 1322.9117                  | 1322.9117                 | 0                      | LLNGSLAEEEVVIR   | [Hex]6[HexNAc]5[Fuc]1[NeuAc]1 |
| 3+ | 1419.9438                  | 1419.9435                 | 0.2                    | LLNGSLAEEEVVIR   | [Hex]6[HexNAc]5[Fuc]1[NeuAc]2 |
| 3+ | 1516.9761                  | 1516.9753                 | 1                      | LLNGSLAEEEVVIR   | [Hex]6[HexNAc]5[Fuc]1[NeuAc]3 |
| 3+ | 1390.6037                  | 1390.6048                 | 1                      | LLNGSLAEEEVVIR   | [Hex]6[HexNAc]6[Fuc]1[NeuAc]1 |

| CS | Experimental<br><i>m/z</i> | Theoretical<br><i>m/z</i> | Mass<br>Error<br>(ppm) | Peptide Sequence | Glycan                        |
|----|----------------------------|---------------------------|------------------------|------------------|-------------------------------|
| 3+ | 1584.6714                  | 1584.6684                 | 2                      | LLNGSLAEEEVVIR   | [Hex]6[HexNAc]6[Fuc]1[NeuAc]3 |
| 3+ | 1444.6216                  | 1444.6224                 | 1                      | LLNGSLAEEEVVIR   | [Hex]7[HexNAc]6[Fuc]1[NeuAc]1 |
| 4+ | 1156.4938                  | 1156.4925                 | 1                      | LLNGSLAEEEVVIR   | [Hex]7[HexNAc]6[Fuc]1[NeuAc]2 |
| 4+ | 1229.2688                  | 1229.2663                 | 2                      | LLNGSLAEEEVVIR   | [Hex]7[HexNAc]6[Fuc]1[NeuAc]3 |
| 4+ | 1302.0410                  | 1302.0402                 | 1                      | LLNGSLAEEEVVIR   | [Hex]7[HexNAc]6[Fuc]1[NeuAc]4 |
| 2+ | 771.4253                   | 771.4303                  | 7                      | LLNGSLAEEEVVIR   | non-glycosylated              |
| 2+ | 607.2708                   | 607.2702                  | 1                      | SDNFTNNAK        | [HexNAc]                      |
| 2+ | 680.2997                   | 680.2991                  | 1                      | SDNFTNNAK        | [HexNAc][Fuc]                 |
| 2+ | 951.8920                   | 951.8891                  | 3                      | SDNFTNNAK        | [Hex]3[HexNAc]2               |
| 2+ | 1053.4272                  | 1053.4288                 | 2                      | SDNFTNNAK        | [Hex]3[HexNAc]3               |
| 2+ | 1126.4607                  | 1126.4578                 | 3                      | SDNFTNNAK        | [Hex]3[HexNAc]3[Fuc]1         |
| 2+ | 1154.9698                  | 1154.9685                 | 1                      | SDNFTNNAK        | [Hex]3[HexNAc]4               |
| 2+ | 1227.9980                  | 1227.9974                 | 0.5                    | SDNFTNNAK        | [Hex]3[HexNAc]4[Fuc]1         |
| 2+ | 1329.5363                  | 1329.5372                 | 1                      | SDNFTNNAK        | [Hex]3[HexNAc]5[Fuc]1         |
| 2+ | 1431.0780                  | 1431.0769                 | 1                      | SDNFTNNAK        | [Hex]3[HexNAc]6[Fuc]1         |
| 2+ | 1032.9210                  | 1032.9156                 | 5                      | SDNFTNNAK        | [Hex]4[HexNAc]2               |
| 2+ | 1134.4633                  | 1134.4552                 | 7                      | SDNFTNNAK        | [Hex]4[HexNAc]3               |
| 2+ | 1280.0096                  | 1280.0029                 | 5                      | SDNFTNNAK        | [Hex]4[HexNAc]3[NeuAc]1       |
| 2+ | 1207.4860                  | 1207.4842                 | 1                      | SDNFTNNAK        | [Hex]4[HexNAc]3[Fuc]1         |
| 2+ | 1353.0325                  | 1353.0319                 | 0.4                    | SDNFTNNAK        | [Hex]4[HexNAc]3[Fuc]1[NeuAc]1 |
| 2+ | 1235.9963                  | 1235.9949                 | 1                      | SDNFTNNAK        | [Hex]4[HexNAc]4               |
| 2+ | 1381.5426                  | 1381.5426                 | 0                      | SDNFTNNAK        | [Hex]4[HexNAc]4[NeuAc]1       |
| 2+ | 1309.0266                  | 1309.0239                 | 2                      | SDNFTNNAK        | [Hex]4[HexNAc]4[Fuc]1         |
| 2+ | 1454.5714                  | 1454.5716                 | 0.1                    | SDNFTNNAK        | [Hex]4[HexNAc]4[Fuc]1[NeuAc]1 |
| 2+ | 1410.5619                  | 1410.5635                 | 1                      | SDNFTNNAK        | [Hex]4[HexNAc]5[Fuc]1         |
| 2+ | 1483.0696                  | 1483.0823                 | 9                      | SDNFTNNAK        | [Hex]4[HexNAc]5[NeuAc]1       |
| 2+ | 1512.1144                  | 1512.1032                 | 7                      | SDNFTNNAK        | [Hex]4[HexNAc]6[Fuc]1         |
| 2+ | 1113.9423                  | 1113.9419                 | 0.4                    | SDNFTNNAK        | [Hex]5[HexNAc]2               |
| 2+ | 1288.5180                  | 1288.5106                 | 6                      | SDNFTNNAK        | [Hex]5[HexNAc]3[Fuc]1         |
| 2+ | 1434.0651                  | 1434.0583                 | 5                      | SDNFTNNAK        | [Hex]5[HexNAc]3[Fuc]1[NeuAc]1 |
| 2+ | 1317.0229                  | 1317.0213                 | 1                      | SDNFTNNAK        | [Hex]5[HexNAc]4               |
| 2+ | 1390.0525                  | 1390.0503                 | 2                      | SDNFTNNAK        | [Hex]5[HexNAc]4[Fuc]1         |
| 2+ | 1535.5984                  | 1535.5980                 | 0.3                    | SDNFTNNAK        | [Hex]5[HexNAc]4[Fuc]1[NeuAc]1 |
| 2+ | 1681.1459                  | 1681.1457                 | 0.1                    | SDNFTNNAK        | [Hex]5[HexNAc]4[Fuc]1[NeuAc]2 |
| 2+ | 1462.5682                  | 1462.5690                 | 1                      | SDNFTNNAK        | [Hex]5[HexNAc]4[NeuAc]1       |
| 2+ | 1491.5901                  | 1491.5900                 | 0.1                    | SDNFTNNAK        | [Hex]5[HexNAc]5[Fuc]1         |
| 2+ | 1637.1399                  | 1637.1377                 | 1                      | SDNFTNNAK        | [Hex]5[HexNAc]5[Fuc]1[NeuAc]1 |
| 2+ | 1782.6835                  | 1782.6854                 | 1                      | SDNFTNNAK        | [Hex]5[HexNAc]5[Fuc]1[NeuAc]2 |
| 2+ | 1194.9742                  | 1194.9684                 | 5                      | SDNFTNNAK        | [Hex]6[HexNAc]2               |
| 2+ | 1296.5102                  | 1296.5080                 | 2                      | SDNFTNNAK        | [Hex]6[HexNAc]3               |
| 2+ | 1442.0614                  | 1442.0557                 | 4                      | SDNFTNNAK        | [Hex]6[HexNAc]3[NeuAc]1       |
| 2+ | 1572.6155                  | 1572.6164                 | 1                      | SDNFTNNAK        | [Hex]6[HexNAc]5[Fuc]1         |
| 2+ | 1718.1667                  | 1718.1641                 | 2                      | SDNFTNNAK        | [Hex]6[HexNAc]5[Fuc]1[NeuAc]1 |
| 2+ | 1674.1666                  | 1674.1561                 | 6                      | SDNFTNNAK        | [Hex]6[HexNAc]6[Fuc]1         |
| 2+ | 1965.2655                  | 1965.2515                 | 7                      | SDNFTNNAK        | [Hex]6[HexNAc]6[Fuc]1[NeuAc]2 |
| 2+ | 1276.0000                  | 1275.9948                 | 4                      | SDNFTNNAK        | [Hex]7[HexNAc]2               |
| 2+ | 1357.0269                  | 1357.0212                 | 4                      | SDNFTNNAK        | [Hex]8[HexNAc]2               |

| CS | Experimental<br><i>m/z</i> | Theoretical<br><i>m/z</i> | Mass<br>Error<br>(ppm) | Peptide Sequence | Glycan                              |
|----|----------------------------|---------------------------|------------------------|------------------|-------------------------------------|
| 2+ | 1438.0507                  | 1438.0476                 | 2                      | SDNFTNNAK        | [Hex]9[HexNAc]2                     |
| 3+ | 1037.7430                  | 1037.7433                 | 0.3                    | SDNFTNNAK        | [Hex]4[HexNAc]5[Fuc]1[NeuAc]1       |
| 3+ | 1105.4301                  | 1105.4364                 | 6                      | SDNFTNNAK        | [Hex]4[HexNAc]6[Fuc]1[NeuAc]1       |
| 3+ | 975.3822                   | 975.3818                  | 0.4                    | SDNFTNNAK        | [Hex]5 [HexNAc]4 [NeuAc]1           |
| 3+ | 1242.8109                  | 1242.8103                 | 0.5                    | SDNFTNNAK        | [Hex]6[HexNAc]5[Fuc]1[NeuAc]2       |
| 3+ | 1339.8415                  | 1339.8421                 | 0.4                    | SDNFTNNAK        | [Hex]6[HexNAc]5[Fuc]1[NeuAc]3       |
| 3+ | 1213.4704                  | 1213.4716                 | 1                      | SDNFTNNAK        | [Hex]6[HexNAc]6[Fuc]1[NeuAc]1       |
| 3+ | 1407.5466                  | 1407.5352                 | 8                      | SDNFTNNAK        | [Hex]6[HexNAc]6[Fuc]1[NeuAc]3       |
| 3+ | 1170.4656                  | 1170.4574                 | 7                      | SDNFTNNAK        | [Hex]7[HexNAc]6[Fuc]1               |
| 3+ | 1267.4933                  | 1267.4892                 | 3                      | SDNFTNNAK        | [Hex]7[HexNAc]6[Fuc]1[NeuAc]1       |
| 3+ | 1364.5195                  | 1364.5210                 | 1                      | SDNFTNNAK        | [Hex]7[HexNAc]6[Fuc]1[NeuAc]2       |
| 3+ | 1461.5517                  | 1461.5528                 | 1                      | SDNFTNNAK        | [Hex]7[HexNAc]6[Fuc]1[NeuAc]3       |
| 3+ | 1558.5719                  | 1558.5846                 | 8                      | SDNFTNNAK        | [Hex]7[HexNAc]6[Fuc]1[NeuAc]4       |
| 2+ | 505.7309                   | 505.7305                  | 1                      | SDNFTNNAK        | non-glycosylated                    |
| 3+ | 1196.8315                  | 1196.8297                 | 2                      | ESVEINCRPNNNTR   | [Hex]6[HexNAc]4                     |
| 3+ | 1380.9021                  | 1380.9020                 | 0.1                    | ESVEINCRPNNNTR   | [Hex]6[HexNAc]6[Fuc]1               |
| 3+ | 1497.2757                  | 1497.2810                 | 4                      | ESVEINCRPNNNTR   | [Hex]6[HexNAc]7[Fuc]2               |
| 3+ | 1531.9510                  | 1531.9514                 | 0.3                    | ESVEINCRPNNNTR   | [Hex]7 [HexNAc]6 [Fuc]1<br>[NeuAc]1 |
| 3+ | 1250.8503                  | 1250.8473                 | 2                      | ESVEINCRPNNNTR   | [Hex]7[HexNAc]4                     |
| 3+ | 1367.2246                  | 1367.2264                 | 1                      | ESVEINCRPNNNTR   | [Hex]7[HexNAc]5[Fuc]1               |
| 3+ | 1434.9184                  | 1434.9196                 | 1                      | ESVEINCRPNNNTR   | [Hex]7[HexNAc]6[Fuc]1               |
| 3+ | 1618.9940                  | 1618.9918                 | 1                      | ESVEINCRPNNNTR   | [Hex]7[HexNAc]8[Fuc]2               |
| 3+ | 1304.8685                  | 1304.8649                 | 3                      | ESVEINCRPNNNTR   | [Hex]8[HexNAc]4                     |
| 3+ | 1372.5618                  | 1372.5581                 | 3                      | ESVEINCRPNNNTR   | [Hex]8[HexNAc]5                     |
| 3+ | 1421.2430                  | 1421.2440                 | 1                      | ESVEINCRPNNNTR   | [Hex]8[HexNAc]5[Fuc]1               |
| 3+ | 1488.9372                  | 1488.9372                 | 0                      | ESVEINCRPNNNTR   | [Hex]8[HexNAc]6[Fuc]1               |
| 3+ | 1358.8836                  | 1358.8826                 | 1                      | ESVEINCRPNNNTR   | [Hex]9[HexNAc]4                     |
| 3+ | 1475.2611                  | 1475.2616                 | 0.3                    | ESVEINCRPNNNTR   | [Hex]9[HexNAc]5[Fuc]1               |
| 3+ | 1572.2812                  | 1572.2934                 | 8                      | ESVEINCRPNNNTR   | [Hex]9[HexNAc]5[Fuc]1[NeuAc]1       |
| 3+ | 1542.9562                  | 1542.9548                 | 1                      | ESVEINCRPNNNTR   | [Hex]9[HexNAc]6[Fuc]1               |
| 3+ | 1639.9900                  | 1639.9866                 | 2                      | ESVEINCRPNNNTR   | [Hex]9[HexNAc]6[Fuc]1[NeuAc]1       |
| 3+ | 1412.9014                  | 1412.9002                 | 1                      | ESVEINCRPNNNTR   | [Hex]10[HexNAc]4                    |
| 3+ | 1529.2769                  | 1529.2792                 | 2                      | ESVEINCRPNNNTR   | [Hex]10[HexNAc]5[Fuc]1              |
| 3+ | 1596.9712                  | 1596.9724                 | 1                      | ESVEINCRPNNNTR   | [Hex]10[HexNAc]6[Fuc]1              |
| 3+ | 1694.0047                  | 1694.0042                 | 0.3                    | ESVEINCRPNNNTR   | [Hex]10[HexNAc]6[Fuc]1[NeuAc]1      |
| 3+ | 1466.9178                  | 1466.9178                 | 0                      | ESVEINCRPNNNTR   | [Hex]11[HexNAc]4                    |
| 3+ | 1583.2946                  | 1583.2968                 | 1                      | ESVEINCRPNNNTR   | [Hex]11[HexNAc]5[Fuc]1              |
| 3+ | 1650.9910                  | 1650.9900                 | 1                      | ESVEINCRPNNNTR   | [Hex]11[HexNAc]6[Fuc]1              |
| 3+ | 1748.0203                  | 1748.0218                 | 1                      | ESVEINCRPNNNTR   | [Hex]11[HexNAc]6[Fuc]1[NeuAc]1      |
| 3+ | 1520.9370                  | 1520.9354                 | 1                      | ESVEINCRPNNNTR   | [Hex]12[HexNAc]4                    |
| 3+ | 1588.6249                  | 1588.6285                 | 2                      | ESVEINCRPNNNTR   | [Hex]12[HexNAc]5                    |
| 3+ | 1637.3145                  | 1637.3145                 | 0.0                    | ESVEINCRPNNNTR   | [Hex]12[HexNAc]5[Fuc]1              |
| 3+ | 1734.3489                  | 1734.3463                 | 1                      | ESVEINCRPNNNTR   | [Hex]12[HexNAc]5[Fuc]1[NeuAc]1      |
| 3+ | 1656.3199                  | 1656.3216                 | 1                      | ESVEINCRPNNNTR   | [Hex]12[HexNAc]6                    |
| 3+ | 1705.0081                  | 1705.0076                 | 0.3                    | ESVEINCRPNNNTR   | [Hex]12[HexNAc]6[Fuc]1              |
| 3+ | 1802.0389                  | 1802.0394                 | 0.3                    | ESVEINCRPNNNTR   | [Hex]12[HexNAc]6[Fuc]1[NeuAc]1      |

| CS | Experimental<br><i>m/z</i> | Theoretical<br><i>m/z</i> | Mass<br>Error<br>(ppm) | Peptide Sequence | Glycan                         |
|----|----------------------------|---------------------------|------------------------|------------------|--------------------------------|
| 3+ | 1574.9529                  | 1574.9530                 | 0.1                    | ESVEINSTRPNNNTR  | [Hex]13[HexNAc]4               |
| 3+ | 1642.6450                  | 1642.6461                 | 1                      | ESVEINSTRPNNNTR  | [Hex]13[HexNAc]5               |
| 3+ | 1788.3639                  | 1788.3639                 | 0                      | ESVEINSTRPNNNTR  | [Hex]13[HexNAc]5[Fuc]1[NeuAc]1 |
| 3+ | 1759.0222                  | 1759.0252                 | 2                      | ESVEINSTRPNNNTR  | [Hex]13[HexNAc]6[Fuc]1         |
| 3+ | 1628.9707                  | 1628.9706                 | 0.1                    | ESVEINSTRPNNNTR  | [Hex]14[HexNAc]4               |
| 3+ | 1745.3584                  | 1745.3497                 | 5                      | ESVEINSTRPNNNTR  | [Hex]14[HexNAc]5[Fuc]1         |
| 3+ | 1910.0751                  | 1910.0746                 | 0.3                    | ESVEINSTRPNNNTR  | [Hex]14[HexNAc]6[Fuc]1[NeuAc]1 |
| 3+ | 1682.9887                  | 1682.9882                 | 0.3                    | ESVEINSTRPNNNTR  | [Hex]15[HexNAc]4               |
| 3+ | 1737.0130                  | 1737.0058                 | 4                      | ESVEINSTRPNNNTR  | [Hex]16[HexNAc]4               |
| 3+ | 1791.0436                  | 1791.0234                 | 11                     | ESVEINSTRPNNNTR  | [Hex]17[HexNAc]4               |
|    |                            |                           |                        |                  |                                |
| 4+ | 1189.7307                  | 1189.7285                 | 2                      | ESVEINSTRPNNNTR  | [Hex]8[HexNAc]6[Fuc]1[NeuAc]1  |
| 4+ | 1441.5733                  | 1441.5737                 | 0.3                    | ESVEINSTRPNNNTR  | [Hex]11[HexNAc]10[Fuc]1        |
| 4+ | 1356.0381                  | 1356.0352                 | 2                      | ESVEINSTRPNNNTR  | [Hex]13[HexNAc]6[Fuc]2         |
| 4+ | 1360.0323                  | 1360.0339                 | 1                      | ESVEINSTRPNNNTR  | [Hex]14[HexNAc]6[Fuc]1         |
| 4+ | 1505.5881                  | 1505.5816                 | 4                      | ESVEINSTRPNNNTR  | [Hex]14[HexNAc]6[Fuc]1[NeuAc]2 |
|    |                            |                           |                        |                  |                                |
| 3+ | 669.6451                   | 669.6447                  | 1                      | ESVEINSTRPNNNTR  | [HexNAc]                       |
| 3+ | 737.3395                   | 737.3379                  | 2                      | ESVEINSTRPNNNTR  | [HexNAc]2                      |
| 3+ | 899.3912                   | 899.3907                  | 1                      | ESVEINSTRPNNNTR  | [Hex]3[HexNAc]2                |
| 3+ | 967.0863                   | 967.0838                  | 3                      | ESVEINSTRPNNNTR  | [Hex]3[HexNAc]3                |
| 3+ | 1015.7706                  | 1015.7698                 | 1                      | ESVEINSTRPNNNTR  | [Hex]3[HexNAc]3[Fuc]1          |
| 3+ | 1083.4650                  | 1083.4629                 | 2                      | ESVEINSTRPNNNTR  | [Hex]3[HexNAc]4[Fuc]1          |
| 3+ | 1151.1584                  | 1151.1560                 | 2                      | ESVEINSTRPNNNTR  | [Hex]3[HexNAc]5[Fuc]1          |
| 3+ | 953.4109                   | 953.4083                  | 3                      | ESVEINSTRPNNNTR  | [Hex]4[HexNAc]2                |
| 3+ | 1021.1057                  | 1021.1014                 | 4                      | ESVEINSTRPNNNTR  | [Hex]4[HexNAc]3                |
| 3+ | 1234.5129                  | 1234.5123                 | 0.5                    | ESVEINSTRPNNNTR  | [Hex]4[HexNAc]4[Fuc]1[NeuAc]1  |
| 3+ | 1205.1737                  | 1205.1736                 | 0.1                    | ESVEINSTRPNNNTR  | [Hex]4[HexNAc]5[Fuc]1          |
| 3+ | 1302.2074                  | 1302.2054                 | 2                      | ESVEINSTRPNNNTR  | [Hex]4[HexNAc]5[Fuc]1[NeuAc]1  |
| 3+ | 1369.9056                  | 1369.8986                 | 5                      | ESVEINSTRPNNNTR  | [Hex]4[HexNAc]6[Fuc]1[NeuAc]1  |
| 3+ | 1007.4246                  | 1007.4259                 | 1                      | ESVEINSTRPNNNTR  | [Hex]5[HexNAc]2                |
| 3+ | 1075.1222                  | 1075.1190                 | 3                      | ESVEINSTRPNNNTR  | [Hex]5[HexNAc]3                |
| 3+ | 1288.5269                  | 1288.5299                 | 2                      | ESVEINSTRPNNNTR  | [Hex]5[HexNAc]4[Fuc]1[NeuAc]1  |
| 3+ | 1356.2235                  | 1356.2230                 | 0.4                    | ESVEINSTRPNNNTR  | [Hex]5[HexNAc]5[Fuc]1[NeuAc]1  |
| 3+ | 1453.2546                  | 1453.2548                 | 0.1                    | ESVEINSTRPNNNTR  | [Hex]5[HexNAc]5[Fuc]1[NeuAc]2  |
| 3+ | 1061.4413                  | 1061.4435                 | 2                      | ESVEINSTRPNNNTR  | [Hex]6[HexNAc]2                |
| 3+ | 1458.5905                  | 1458.5865                 | 3                      | ESVEINSTRPNNNTR  | [Hex]6[HexNAc]5[NeuAc]2        |
| 3+ | 1313.2094                  | 1313.2088                 | 0.5                    | ESVEINSTRPNNNTR  | [Hex]6[HexNAc]5[Fuc]1          |
| 3+ | 1380.9040                  | 1380.9020                 | 1                      | ESVEINSTRPNNNTR  | [Hex]6[HexNAc]6[Fuc]1          |
| 3+ | 1574.9685                  | 1574.9656                 | 2                      | ESVEINSTRPNNNTR  | [Hex]6[HexNAc]6[Fuc]1[NeuAc]2  |
| 3+ | 1115.4551                  | 1115.4611                 | 5                      | ESVEINSTRPNNNTR  | [Hex]7[HexNAc]2                |
| 3+ | 1367.2216                  | 1367.2264                 | 4                      | ESVEINSTRPNNNTR  | [Hex]7[HexNAc]5[Fuc]1          |
| 3+ | 1434.9161                  | 1434.9196                 | 2                      | ESVEINSTRPNNNTR  | [Hex]7[HexNAc]6[Fuc]1          |
| 3+ | 1531.9510                  | 1531.9514                 | 0.3                    | ESVEINSTRPNNNTR  | [Hex]7[HexNAc]6[Fuc]1[NeuAc]1  |
| 3+ | 1169.4821                  | 1169.4787                 | 3                      | ESVEINSTRPNNNTR  | [Hex]8[HexNAc]2                |
| 3+ | 1585.9664                  | 1585.9690                 | 2                      | ESVEINSTRPNNNTR  | [Hex]8[HexNAc]6[Fuc]1[NeuAc]1  |
| 3+ | 1223.4931                  | 1223.4963                 | 3                      | ESVEINSTRPNNNTR  | [Hex]9[HexNAc]2                |
|    |                            |                           |                        |                  |                                |
| 4+ | 995.4169                   | 995.4151                  | 2                      | ESVEINSTRPNNNTR  | [Hex]5[HexNAc]6[Fuc]1          |
| 4+ | 1203.4700                  | 1203.4800                 | 8                      | ESVEINSTRPNNNTR  | [Hex]6[HexNAc]5[Fuc]1[NeuAc]3  |



| CS | Experimental<br><i>m/z</i> | Theoretical<br><i>m/z</i> | Mass<br>Error<br>(ppm) | Peptide Sequence | Glycan                        |
|----|----------------------------|---------------------------|------------------------|------------------|-------------------------------|
| 2+ | 594.7763                   | 594.7749                  | 2                      | QAHCNISR         | [HexNAc]                      |
| 2+ | 858.3664                   | 858.3674                  | 1                      | QAHCNISR         | [Hex]2[HexNAc]2               |
| 3+ | 626.5999                   | 626.5983                  | 3                      | QAHCNISR         | [Hex]3[HexNAc]2               |
| 2+ | 1113.9633                  | 1113.9625                 | 1                      | QAHCNISR         | [Hex]3[HexNAc]3[Fuc]1         |
| 2+ | 1142.4745                  | 1142.4732                 | 1                      | QAHCNISR         | [Hex]3[HexNAc]4               |
| 2+ | 1215.5032                  | 1215.5021                 | 1                      | QAHCNISR         | [Hex]3[HexNAc]4[Fuc]1         |
| 2+ | 1317.0369                  | 1317.0419                 | 4                      | QAHCNISR         | [Hex]3[HexNAc]5[Fuc]1         |
| 2+ | 1020.4217                  | 1020.4203                 | 1                      | QAHCNISR         | [Hex]4[HexNAc]2               |
| 2+ | 1194.9929                  | 1194.9889                 | 3                      | QAHCNISR         | [Hex]4[HexNAc]3[Fuc]1         |
| 2+ | 1340.5396                  | 1340.5365                 | 2                      | QAHCNISR         | [Hex]4[HexNAc]3[Fuc]1[NeuAc]1 |
| 2+ | 1296.5323                  | 1296.5286                 | 3                      | QAHCNISR         | [Hex]4[HexNAc]4 [Fuc]1        |
| 2+ | 1296.5329                  | 1296.5286                 | 3                      | QAHCNISR         | [Hex]4[HexNAc]4 [Fuc]1        |
| 2+ | 1442.0782                  | 1442.0763                 | 1                      | QAHCNISR         | [Hex]4[HexNAc]4[Fuc]1[NeuAc]1 |
| 3+ | 932.3896                   | 932.3812                  | 9                      | QAHCNISR         | [Hex]4[HexNAc]5[Fuc]1         |
| 2+ | 1101.4471                  | 1101.4466                 | 0.5                    | QAHCNISR         | [Hex]5[HexNAc]2               |
| 2+ | 1141.4340                  | 1141.4298                 | 4                      | QAHCNISR         | [Hex]5[HexNAc]2[PO3]1         |
| 2+ | 1202.9917                  | 1202.9863                 | 4                      | QAHCNISR         | [Hex]5[HexNAc]3               |
| 2+ | 1377.5569                  | 1377.5550                 | 1                      | QAHCNISR         | [Hex]5[HexNAc]4[Fuc]1         |
| 2+ | 1523.1032                  | 1523.1027                 | 0.3                    | QAHCNISR         | [Hex]5[HexNAc]4[Fuc]1[NeuAc]1 |
| 2+ | 1668.6525                  | 1668.6504                 | 1                      | QAHCNISR         | [Hex]5[HexNAc]4[Fuc]1[NeuAc]2 |
| 2+ | 1182.4762                  | 1182.4731                 | 3                      | QAHCNISR         | [Hex]6[HexNAc]2               |
| 3+ | 1040.4174                  | 1040.4165                 | 1                      | QAHCNISR         | [Hex]6[HexNAc]5[Fuc]1         |
| 3+ | 1137.4429                  | 1137.4483                 | 5                      | QAHCNISR         | [Hex]6[HexNAc]5[Fuc]1[NeuAc]1 |
| 3+ | 1234.4833                  | 1234.4801                 | 3                      | QAHCNISR         | [Hex]6[HexNAc]5[Fuc]1[NeuAc]2 |
| 2+ | 1263.4995                  | 1263.4995                 | 0                      | QAHCNISR         | [Hex]7[HexNAc]2               |
| 3+ | 1259.1579                  | 1259.1590                 | 1                      | QAHCNISR         | [Hex]7[HexNAc]6[Fuc]1[NeuAc]1 |
| 2+ | 1344.5263                  | 1344.5259                 | 0.3                    | QAHCNISR         | [Hex]8[HexNAc]2               |
| 2+ | 1425.5535                  | 1425.5523                 | 1                      | QAHCNISR         | [Hex]9[HexNAc]2               |
| 2+ | 493.2366                   | 493.2352                  | 3                      | QAHCNISR         | non-glycosylated              |
| 2+ | 490.2414                   | 490.2402                  | 2                      | WNDTLK           | [HexNAc]                      |
| 2+ | 563.2719                   | 563.2691                  | 5                      | WNDTLK           | [HexNAc][Fuc]                 |
| 2+ | 672.8052                   | 672.8063                  | 2                      | WNDTLK           | [Hex]1[HexNAc]2               |
| 2+ | 753.8350                   | 753.8327                  | 3                      | WNDTLK           | [Hex]2[HexNAc]2               |
| 2+ | 834.8600                   | 834.8591                  | 1                      | WNDTLK           | [Hex]3[HexNAc]2               |
| 2+ | 907.8884                   | 907.8881                  | 0.3                    | WNDTLK           | [Hex]3[HexNAc]2[Fuc]1         |
| 2+ | 936.4005                   | 936.3988                  | 2                      | WNDTLK           | [Hex]3[HexNAc]3               |
| 2+ | 1009.4297                  | 1009.4278                 | 2                      | WNDTLK           | [Hex]3[HexNAc]3[Fuc]1         |
| 2+ | 1037.9416                  | 1037.9385                 | 3                      | WNDTLK           | [Hex]3[HexNAc]4               |
| 2+ | 1212.5072                  | 1212.5072                 | 0                      | WNDTLK           | [Hex]3[HexNAc]5[Fuc]1         |
| 2+ | 1162.9764                  | 1162.9729                 | 3                      | WNDTLK           | [Hex]4 [HexNAc]3 [NeuAc]1     |
| 2+ | 915.8878                   | 915.8856                  | 2                      | WNDTLK           | [Hex]4[HexNAc]2               |
| 2+ | 1017.4249                  | 1017.4252                 | 0.3                    | WNDTLK           | [Hex]4[HexNAc]3               |
| 2+ | 1090.4532                  | 1090.4542                 | 1                      | WNDTLK           | [Hex]4[HexNAc]3[Fuc]1         |
| 2+ | 1236.0032                  | 1236.0019                 | 1                      | WNDTLK           | [Hex]4[HexNAc]3[Fuc]1[NeuAc]1 |
| 2+ | 1162.9795                  | 1162.9729                 | 6                      | WNDTLK           | [Hex]4[HexNAc]3[NeuAc]1       |
| 2+ | 1118.9618                  | 1118.9649                 | 3                      | WNDTLK           | [Hex]4[HexNAc]4               |

| CS | Experimental<br><i>m/z</i> | Theoretical<br><i>m/z</i> | Mass<br>Error<br>(ppm) | Peptide Sequence | Glycan                        |
|----|----------------------------|---------------------------|------------------------|------------------|-------------------------------|
| 2+ | 1191.9951                  | 1191.9939                 | 1                      | WNDTLK           | [Hex]4[HexNAc]4[Fuc]1         |
| 2+ | 1337.5427                  | 1337.5416                 | 1                      | WNDTLK           | [Hex]4[HexNAc]4[Fuc]1[NeuAc]1 |
| 2+ | 1264.5138                  | 1264.5126                 | 1                      | WNDTLK           | [Hex]4[HexNAc]4[NeuAc]1       |
| 2+ | 1293.5347                  | 1293.5335                 | 1                      | WNDTLK           | [Hex]4[HexNAc]5[Fuc]1         |
| 2+ | 1439.0800                  | 1439.0813                 | 1                      | WNDTLK           | [Hex]4[HexNAc]5[Fuc]1[NeuAc]1 |
| 2+ | 1345.5405                  | 1345.5390                 | 1                      | WNDTLK           | [Hex]5[HexNAc]4[NeuAc]1       |
| 2+ | 996.9151                   | 996.9119                  | 3                      | WNDTLK           | [Hex]5[HexNAc]2               |
| 2+ | 1098.4470                  | 1098.4516                 | 4                      | WNDTLK           | [Hex]5[HexNAc]3               |
| 2+ | 1244.0005                  | 1243.9993                 | 1                      | WNDTLK           | [Hex]5[HexNAc]3[NeuAc]1       |
| 2+ | 1171.4813                  | 1171.4806                 | 1                      | WNDTLK           | [Hex]5[HexNAc]3[Fuc]1         |
| 2+ | 1317.0263                  | 1317.0282                 | 1                      | WNDTLK           | [Hex]5[HexNAc]3[Fuc]1[NeuAc]1 |
| 2+ | 1199.9954                  | 1199.9913                 | 3                      | WNDTLK           | [Hex]5[HexNAc]4               |
| 2+ | 1273.0218                  | 1273.0203                 | 1                      | WNDTLK           | [Hex]5[HexNAc]4[Fuc]1         |
| 2+ | 1418.5683                  | 1418.5680                 | 0.2                    | WNDTLK           | [Hex]5[HexNAc]4[Fuc]1[NeuAc]1 |
| 2+ | 1564.1155                  | 1564.1157                 | 0.1                    | WNDTLK           | [Hex]5[HexNAc]4[Fuc]1[NeuAc]2 |
| 2+ | 1374.5623                  | 1374.5600                 | 2                      | WNDTLK           | [Hex]5[HexNAc]5[Fuc]1         |
| 2+ | 1077.9421                  | 1077.9384                 | 3                      | WNDTLK           | [Hex]6[HexNAc]2               |
| 2+ | 1179.4788                  | 1179.4780                 | 1                      | WNDTLK           | [Hex]6[HexNAc]3               |
| 2+ | 1252.5078                  | 1252.5069                 | 1                      | WNDTLK           | [Hex]6[HexNAc]3[Fuc]1         |
| 2+ | 1398.0588                  | 1398.0547                 | 3                      | WNDTLK           | [Hex]6[HexNAc]3[Fuc]1[NeuAc]1 |
| 2+ | 1325.0241                  | 1325.0257                 | 1                      | WNDTLK           | [Hex]6[HexNAc]3[NeuAc]1       |
| 2+ | 1455.5878                  | 1455.5864                 | 1                      | WNDTLK           | [Hex]6[HexNAc]5[Fuc]1         |
| 2+ | 1783.7112                  | 1783.7002                 | 6                      | WNDTLK           | [Hex]7[HexNAc]6[Fuc]1[NeuAc]1 |
| 2+ | 1239.9930                  | 1239.9912                 | 1                      | WNDTLK           | [Hex]8[HexNAc]2               |
| 2+ | 1321.0183                  | 1321.0176                 | 1                      | WNDTLK           | [Hex]9[HexNAc]2               |
|    |                            |                           |                        |                  |                               |
| 3+ | 740.9814                   | 740.9807                  | 1                      | WNDTLK           | [Hex]3[HexNAc]4[Fuc]1         |
| 3+ | 1013.7407                  | 1013.7409                 | 0.2                    | WNDTLK           | [Hex]5[HexNAc]5[Fuc]1[NeuAc]1 |
| 3+ | 1110.7747                  | 1110.7727                 | 2                      | WNDTLK           | [Hex]5[HexNAc]5[Fuc]1[NeuAc]2 |
| 3+ | 1178.4703                  | 1178.4658                 | 4                      | WNDTLK           | [Hex]5[HexNAc]6[Fuc]1[NeuAc]2 |
| 3+ | 1067.7566                  | 1067.7585                 | 2                      | WNDTLK           | [Hex]6[HexNAc]5[Fuc]1[NeuAc]1 |
| 3+ | 1164.7913                  | 1164.7903                 | 1                      | WNDTLK           | [Hex]6[HexNAc]5[Fuc]1[NeuAc]2 |
| 3+ | 1261.8237                  | 1261.8221                 | 1                      | WNDTLK           | [Hex]6[HexNAc]5[Fuc]1[NeuAc]3 |
| 3+ | 1135.4503                  | 1135.4516                 | 1                      | WNDTLK           | [Hex]6[HexNAc]6[Fuc]1[NeuAc]1 |
| 3+ | 1232.4813                  | 1232.4834                 | 2                      | WNDTLK           | [Hex]6[HexNAc]6[Fuc]1[NeuAc]2 |
| 3+ | 1329.5152                  | 1329.5152                 | 0                      | WNDTLK           | [Hex]6[HexNAc]6[Fuc]1[NeuAc]3 |
| 3+ | 772.9805                   | 772.9789                  | 2                      | WNDTLK           | [Hex]7[HexNAc]2               |
| 3+ | 1092.4276                  | 1092.4374                 | 9                      | WNDTLK           | [Hex]7[HexNAc]6[Fuc]1         |
| 3+ | 1286.5035                  | 1286.5010                 | 2                      | WNDTLK           | [Hex]7[HexNAc]6[Fuc]1[NeuAc]2 |
| 3+ | 1383.5338                  | 1383.5328                 | 1                      | WNDTLK           | [Hex]7[HexNAc]6[Fuc]1[NeuAc]3 |
|    |                            |                           |                        |                  |                               |
| 1+ | 776.3967                   | 776.3937                  | 4                      | WNDTLK           | non-glycosylated              |
|    |                            |                           |                        |                  |                               |
| 2+ | 843.8487                   | 843.8462                  | 3                      | EQFENK           | [Hex]3[HexNAc]2               |
| 2+ | 1018.4163                  | 1018.4149                 | 1                      | EQFENK           | [Hex]3[HexNAc]3[Fuc]1         |
| 2+ | 1119.9538                  | 1119.9545                 | 1                      | EQFENK           | [Hex]3[HexNAc]4[Fuc]1         |
| 2+ | 1221.4948                  | 1221.4943                 | 0.4                    | EQFENK           | [Hex]3[HexNAc]5[Fuc]1         |
| 2+ | 924.8769                   | 924.8727                  | 5                      | EQFENK           | [Hex]4[HexNAc]2               |
| 2+ | 1099.4437                  | 1099.4413                 | 2                      | EQFENK           | [Hex]4[HexNAc]3[Fuc]1         |
| 2+ | 1244.9890                  | 1244.9890                 | 0                      | EQFENK           | [Hex]4[HexNAc]3[Fuc]1[NeuAc]1 |

| CS | Experimental m/z | Theoretical m/z | Mass Error (ppm) | Peptide Sequence | Glycan                        |
|----|------------------|-----------------|------------------|------------------|-------------------------------|
| 2+ | 1127.9492        | 1127.9520       | 2                | EQFENK           | [Hex]4[HexNAc]4               |
| 2+ | 1200.9842        | 1200.9810       | 3                | EQFENK           | [Hex]4[HexNAc]4 [Fuc]1        |
| 2+ | 1346.5284        | 1346.5287       | 0.2              | EQFENK           | [Hex]4[HexNAc]4[Fuc]1[NeuAc]1 |
| 2+ | 1302.5205        | 1302.5206       | 0.1              | EQFENK           | [Hex]4[HexNAc]5[Fuc]1         |
| 2+ | 1448.0704        | 1448.0684       | 1                | EQFENK           | [Hex]4[HexNAc]5[Fuc]1[NeuAc]1 |
| 2+ | 1005.9018        | 1005.8990       | 3                | EQFENK           | [Hex]5[HexNAc]2               |
| 2+ | 1180.4742        | 1180.4677       | 6                | EQFENK           | [Hex]5[HexNAc]3[Fuc]1         |
| 2+ | 1282.0100        | 1282.0074       | 2                | EQFENK           | [Hex]5[HexNAc]4[Fuc]1         |
| 2+ | 1427.5576        | 1427.5550       | 2                | EQFENK           | [Hex]5[HexNAc]4[Fuc]1[NeuAc]1 |
| 2+ | 1573.1033        | 1573.1028       | 0.3              | EQFENK           | [Hex]5[HexNAc]4[Fuc]1[NeuAc]2 |
| 2+ | 1383.5498        | 1383.5471       | 2                | EQFENK           | [Hex]5[HexNAc]5[Fuc]1         |
| 2+ | 1529.0966        | 1529.0948       | 1                | EQFENK           | [Hex]5[HexNAc]5[Fuc]1[NeuAc]1 |
| 2+ | 1674.6404        | 1674.6425       | 1                | EQFENK           | [Hex]5[HexNAc]5[Fuc]1[NeuAc]2 |
| 2+ | 1086.9304        | 1086.9255       | 5                | EQFENK           | [Hex]6[HexNAc]2               |
| 2+ | 1261.5000        | 1261.4941       | 5                | EQFENK           | [Hex]6[HexNAc]3[Fuc]1         |
| 2+ | 1407.0392        | 1407.0418       | 2                | EQFENK           | [Hex]6[HexNAc]3[Fuc]1[NeuAc]1 |
| 2+ | 1464.5753        | 1464.5735       | 1                | EQFENK           | [Hex]6[HexNAc]5[Fuc]1         |
| 2+ | 1610.1229        | 1610.1212       | 1                | EQFENK           | [Hex]6[HexNAc]5[Fuc]1[NeuAc]1 |
| 2+ | 1755.6765        | 1755.6689       | 4                | EQFENK           | [Hex]6[HexNAc]5[Fuc]1[NeuAc]2 |
| 2+ | 1167.9562        | 1167.9519       | 4                | EQFENK           | [Hex]7[HexNAc]2               |
| 2+ | 1248.9810        | 1248.9783       | 2                | EQFENK           | [Hex]8[HexNAc]2               |
| 2+ | 1330.0092        | 1330.0047       | 3                | EQFENK           | [Hex]9[HexNAc]2               |
|    |                  |                 |                  |                  |                               |
| 3+ | 1267.8139        | 1267.8135       | 0.3              | EQFENK           | [Hex]6[HexNAc]5[Fuc]1[NeuAc]3 |
| 3+ | 1098.4339        | 1098.4288       | 5                | EQFENK           | [Hex]7[HexNAc]6[Fuc]1         |
| 3+ | 1195.4594        | 1195.4606       | 1                | EQFENK           | [Hex]7[HexNAc]6[Fuc]1[NeuAc]1 |
| 3+ | 1292.4987        | 1292.4924       | 5                | EQFENK           | [Hex]7[HexNAc]6[Fuc]1[NeuAc]2 |
| 3+ | 1389.5306        | 1389.5242       | 5                | EQFENK           | [Hex]7[HexNAc]6[Fuc]1[NeuAc]3 |
|    |                  |                 |                  |                  |                               |
| 2+ | 633.8243         | 633.8199        | 7                | LREQFENK         | [HexNAc]                      |
|    |                  |                 |                  |                  |                               |
| 2+ | 532.2811         | 532.2802        | 2                | LREQFENK         | non-glycosylated              |
|    |                  |                 |                  |                  |                               |
| 3+ | 528.2322         | 528.2316        | 1                | NHSSGGDPEIVMH    | [HexNAc]                      |
| 3+ | 576.9187         | 576.9175        | 2                | NHSSGGDPEIVMH    | [HexNAc][Fuc]                 |
|    |                  |                 |                  |                  |                               |
| 2+ | 1055.4369        | 1055.4363       | 1                | NHSSGGDPEIVMH    | [Hex]2[HexNAc]2               |
| 2+ | 1128.4632        | 1128.4652       | 2                | NHSSGGDPEIVMH    | [Hex]2[HexNAc]2[Fuc]1         |
| 2+ | 1136.4620        | 1136.4627       | 1                | NHSSGGDPEIVMH    | [Hex]3[HexNAc]2               |
| 2+ | 1209.4973        | 1209.4916       | 5                | NHSSGGDPEIVMH    | [Hex]3[HexNAc]2[Fuc]1         |
| 2+ | 1311.0345        | 1311.0313       | 2                | NHSSGGDPEIVMH    | [Hex]3[HexNAc]3[Fuc]1         |
| 2+ | 1339.5477        | 1339.5420       | 4                | NHSSGGDPEIVMH    | [Hex]3[HexNAc]4               |
| 2+ | 1412.5702        | 1412.5710       | 1                | NHSSGGDPEIVMH    | [Hex]3[HexNAc]4[Fuc]1         |
| 2+ | 1514.1107        | 1514.1107       | 0                | NHSSGGDPEIVMH    | [Hex]3[HexNAc]5[Fuc]1         |
| 2+ | 1615.6589        | 1615.6504       | 5                | NHSSGGDPEIVMH    | [Hex]3[HexNAc]6[Fuc]1         |
| 2+ | 1217.4922        | 1217.4891       | 3                | NHSSGGDPEIVMH    | [Hex]4[HexNAc]2               |
| 2+ | 1537.6042        | 1537.6054       | 1                | NHSSGGDPEIVMH    | [Hex]4[HexNAc]3[Fuc]1[NeuAc]1 |
| 2+ | 1493.5995        | 1493.5974       | 1                | NHSSGGDPEIVMH    | [Hex]4[HexNAc]4 [Fuc]1        |
| 2+ | 1639.1451        | 1639.1451       | 0                | NHSSGGDPEIVMH    | [Hex]4[HexNAc]4[Fuc]1[NeuAc]1 |
| 2+ | 1371.5454        | 1371.5444       | 1                | NHSSGGDPEIVMH    | [Hex]5[HexNAc]2[Fuc]1         |

| CS | Experimental<br><i>m/z</i> | Theoretical<br><i>m/z</i> | Mass<br>Error<br>(ppm) | Peptide Sequence  | Glycan                        |
|----|----------------------------|---------------------------|------------------------|-------------------|-------------------------------|
| 2+ | 1501.5980                  | 1501.5949                 | 2                      | NHSSGGDPEIVMH     | [Hex]5[HexNAc]4               |
| 2+ | 1574.6247                  | 1574.6238                 | 1                      | NHSSGGDPEIVMH     | [Hex]5[HexNAc]4[Fuc]1         |
| 2+ | 1720.1711                  | 1720.1715                 | 0.2                    | NHSSGGDPEIVMH     | [Hex]5[HexNAc]4[Fuc]1[NeuAc]1 |
| 2+ | 1865.7197                  | 1865.7192                 | 0.3                    | NHSSGGDPEIVMH     | [Hex]5[HexNAc]4[Fuc]1[NeuAc]2 |
| 2+ | 1379.5426                  | 1379.5419                 | 1                      | NHSSGGDPEIVMH     | [Hex]6[HexNAc]2               |
| 2+ | 1626.6402                  | 1626.6293                 | 7                      | NHSSGGDPEIVMH     | [Hex]6[HexNAc]3[NeuAc]1       |
| 2+ | 1460.5683                  | 1460.5683                 | 0                      | NHSSGGDPEIVMH     | [Hex]7[HexNAc]2               |
| 2+ | 1622.6216                  | 1622.6211                 | 0.3                    | NHSSGGDPEIVMH     | [Hex]9[HexNAc]2               |
|    |                            |                           |                        |                   |                               |
| 3+ | 825.6727                   | 825.6707                  | 2                      | NHSSGGDPEIVMH     | [Hex]3[HexNAc]3               |
| 3+ | 928.3750                   | 928.3742                  | 1                      | NHSSGGDPEIVMH     | [Hex]4[HexNAc]3[Fuc]1         |
| 3+ | 976.7189                   | 976.7201                  | 1                      | NHSSGGDPEIVMH     | [Hex]4[HexNAc]3[NeuAc]1       |
| 3+ | 1282.5025                  | 1282.5030                 | 0.4                    | NHSSGGDPEIVMH     | [Hex]5[HexNAc]6[Fuc]1[NeuAc]1 |
| 3+ | 1379.5400                  | 1379.5348                 | 4                      | NHSSGGDPEIVMH     | [Hex]5[HexNAc]6[Fuc]1[NeuAc]2 |
| 3+ | 1036.4039                  | 1036.4094                 | 5                      | NHSSGGDPEIVMH     | [Hex]6[HexNAc]3[Fuc]1[        |
| 3+ | 1133.4473                  | 1133.4412                 | 5                      | NHSSGGDPEIVMH     | [Hex]6[HexNAc]3[Fuc]1[NeuAc]1 |
| 3+ | 1268.8332                  | 1268.8275                 | 4                      | NHSSGGDPEIVMH     | [Hex]6[HexNAc]5[Fuc]1[NeuAc]1 |
| 3+ | 1365.8597                  | 1365.8593                 | 0.3                    | NHSSGGDPEIVMH     | [Hex]6[HexNAc]5[Fuc]1[NeuAc]2 |
| 3+ | 1462.8926                  | 1462.8911                 | 1                      | NHSSGGDPEIVMH     | [Hex]6[HexNAc]5[Fuc]1[NeuAc]3 |
| 3+ | 1336.5190                  | 1336.5206                 | 1                      | NHSSGGDPEIVMH     | [Hex]6[HexNAc]6[Fuc]1[NeuAc]1 |
| 3+ | 1433.5502                  | 1433.5524                 | 2                      | NHSSGGDPEIVMH     | [Hex]6[HexNAc]6[Fuc]1[NeuAc]2 |
| 3+ | 1487.5765                  | 1487.5700                 | 4                      | NHSSGGDPEIVMH     | [Hex]7[HexNAc]6[Fuc]1[NeuAc]2 |
|    |                            |                           |                        |                   |                               |
| 4+ | 1261.4779                  | 1261.4771                 | 1                      | NHSSGGDPEIVMH     | [Hex]7[HexNAc]6[Fuc]1[NeuAc]4 |
|    |                            |                           |                        |                   |                               |
| 2+ | 1528.6494                  | 1528.6497                 | 0.2                    | TIVFNHSSGGDPEIVMH | [Hex]5[HexNAc]2               |
| 2+ | 1771.7301                  | 1771.7290                 | 1                      | TIVFNHSSGGDPEIVMH | [Hex]8[HexNAc]2               |
|    |                            |                           |                        |                   |                               |
| 3+ | 1100.8048                  | 1100.8043                 | 0.5                    | TIVFNHSSGGDPEIVMH | [Hex]4[HexNAc]4               |
| 3+ | 1197.8445                  | 1197.8361                 | 7                      | TIVFNHSSGGDPEIVMH | [Hex]4[HexNAc]4[NeuAc]1       |
| 3+ | 1217.1867                  | 1217.1833                 | 3                      | TIVFNHSSGGDPEIVMH | [Hex]4[HexNAc]5[Fuc]1         |
| 3+ | 1314.2112                  | 1314.2152                 | 3                      | TIVFNHSSGGDPEIVMH | [Hex]4[HexNAc]5[Fuc]1[NeuAc]1 |
| 3+ | 1271.1990                  | 1271.2010                 | 2                      | TIVFNHSSGGDPEIVMH | [Hex]5[HexNAc]5[Fuc]1         |
| 3+ | 1368.2328                  | 1368.2328                 | 0                      | TIVFNHSSGGDPEIVMH | [Hex]5[HexNAc]5[Fuc]1[NeuAc]1 |
| 3+ | 1465.2655                  | 1465.2646                 | 1                      | TIVFNHSSGGDPEIVMH | [Hex]5[HexNAc]5[Fuc]1[NeuAc]2 |
| 3+ | 1325.2203                  | 1325.2186                 | 1                      | TIVFNHSSGGDPEIVMH | [Hex]6[HexNAc]5[Fuc]1         |
| 3+ | 1684.0023                  | 1684.0071                 | 3                      | TIVFNHSSGGDPEIVMH | [Hex]6[HexNAc]6[Fuc]1[NeuAc]3 |
| 3+ | 1446.9299                  | 1446.9293                 | 0.4                    | TIVFNHSSGGDPEIVMH | [Hex]7[HexNAc]6[Fuc]1[        |
| 3+ | 1543.9619                  | 1543.9611                 | 1                      | TIVFNHSSGGDPEIVMH | [Hex]7[HexNAc]6[Fuc]1[NeuAc]1 |
|    |                            |                           |                        |                   |                               |
| 4+ | 1303.7694                  | 1303.7703                 | 1                      | TIVFNHSSGGDPEIVMH | [Hex]7[HexNAc]6[Fuc]1[NeuAc]3 |
|    |                            |                           |                        |                   |                               |
| 2+ | 920.4383                   | 920.4383                  | 0                      | TIVFNHSSGGDPEIVMH | non-glycosylated              |
|    |                            |                           |                        |                   |                               |
| 1+ | 1561.5922                  | 1561.5899                 | 1                      | NSTW              | [Hex]4[HexNAc]2               |
|    |                            |                           |                        |                   |                               |
| 2+ | 700.2736                   | 700.2722                  | 2                      | NSTW              | [Hex]3[HexNAc]2               |
| 2+ | 976.3836                   | 976.3805                  | 3                      | NSTW              | [Hex]3[HexNAc]4[Fuc]1         |
| 2+ | 1179.4666                  | 1179.4599                 | 6                      | NSTW              | [Hex]3[HexNAc]6[Fuc]1         |
| 2+ | 1101.4174                  | 1101.4149                 | 2                      | NSTW              | [Hex]4[HexNAc]3[Fuc]1[NeuAc]1 |

| CS | Experimental<br><i>m/z</i> | Theoretical<br><i>m/z</i> | Mass<br>Error<br>(ppm) | Peptide Sequence     | Glycan                        |
|----|----------------------------|---------------------------|------------------------|----------------------|-------------------------------|
| 2+ | 1057.4169                  | 1057.4069                 | 9                      | NSTW                 | [Hex]4[HexNAc]4[Fuc]1         |
| 2+ | 1202.9558                  | 1202.9546                 | 1                      | NSTW                 | [Hex]4[HexNAc]4[Fuc]1[NeuAc]1 |
| 2+ | 1158.9509                  | 1158.9466                 | 4                      | NSTW                 | [Hex]4[HexNAc]5[Fuc]1         |
| 2+ | 1304.4919                  | 1304.4943                 | 2                      | NSTW                 | [Hex]4[HexNAc]5[Fuc]1[NeuAc]1 |
| 2+ | 862.3280                   | 862.3250                  | 3                      | NSTW                 | [Hex]5[HexNAc]2               |
| 2+ | 1429.5335                  | 1429.5287                 | 3                      | NSTW                 | [Hex]5[HexNAc]4[Fuc]1[NeuAc]2 |
| 2+ | 1239.9719                  | 1239.9730                 | 1                      | NSTW                 | [Hex]5[HexNAc]5[Fuc]1         |
| 2+ | 1105.4066                  | 1105.4042                 | 2                      | NSTW                 | [Hex]8[HexNAc]2               |
|    |                            |                           |                        |                      |                               |
| 2+ | 881.3567                   | 881.3533                  | 4                      | CNSTQLF              | [Hex]3[HexNAc]2               |
| 2+ | 962.3858                   | 962.3798                  | 6                      | CNSTQLF              | [Hex]4[HexNAc]2               |
| 2+ | 1384.0385                  | 1384.0357                 | 2                      | CNSTQLF              | [Hex]4[HexNAc]4[Fuc]1[NeuAc]1 |
| 2+ | 1043.4082                  | 1043.4061                 | 2                      | CNSTQLF              | [Hex]5[HexNAc]2               |
| 2+ | 1124.4384                  | 1124.4326                 | 5                      | CNSTQLF              | [Hex]6[HexNAc]2               |
| 2+ | 1205.4678                  | 1205.4590                 | 7                      | CNSTQLF              | [Hex]7[HexNAc]2               |
| 2+ | 1286.4871                  | 1286.4854                 | 1                      | CNSTQLF              | [Hex]8[HexNAc]2               |
| 2+ | 1367.5126                  | 1367.5118                 | 1                      | CNSTQLF              | [Hex]9[HexNAc]2               |
|    |                            |                           |                        |                      |                               |
| 2+ | 881.8627                   | 881.8586                  | 5                      | YCNSTQLF             | [Hex]2[HexNAc]2               |
| 2+ | 962.8885                   | 962.8850                  | 4                      | YCNSTQLF             | [Hex]3[HexNAc]2               |
| 2+ | 1035.9198                  | 1035.9139                 | 6                      | YCNSTQLF             | [Hex]3[HexNAc]2[Fuc]1         |
| 2+ | 1064.4312                  | 1064.4247                 | 6                      | YCNSTQLF             | [Hex]3[HexNAc]3               |
| 2+ | 1137.4544                  | 1137.4536                 | 1                      | YCNSTQLF             | [Hex]3[HexNAc]3[Fuc]1         |
| 2+ | 1238.9958                  | 1238.9933                 | 2                      | YCNSTQLF             | [Hex]3[HexNAc]4[Fuc]1         |
| 2+ | 1340.5393                  | 1340.5330                 | 5                      | YCNSTQLF             | [Hex]3[HexNAc]5[Fuc]1         |
| 2+ | 1043.9160                  | 1043.9114                 | 4                      | YCNSTQLF             | [Hex]4[HexNAc]2               |
| 2+ | 1364.0303                  | 1364.0277                 | 2                      | YCNSTQLF             | [Hex]4[HexNAc]3[Fuc]1[NeuAc]1 |
| 2+ | 1320.0158                  | 1320.0197                 | 3                      | YCNSTQLF             | [Hex]4[HexNAc]4[Fuc]1         |
| 2+ | 1465.5677                  | 1465.5674                 | 0.2                    | YCNSTQLF             | [Hex]4[HexNAc]4[Fuc]1[NeuAc]1 |
| 2+ | 1567.1117                  | 1567.1071                 | 3                      | YCNSTQLF             | [Hex]4[HexNAc]5[Fuc]1[NeuAc]1 |
| 2+ | 1124.9414                  | 1124.9378                 | 3                      | YCNSTQLF             | [Hex]5[HexNAc]2               |
| 2+ | 1546.5887                  | 1546.5938                 | 3                      | YCNSTQLF             | [Hex]5[HexNAc]4[Fuc]1[NeuAc]1 |
| 3+ | 1128.4350                  | 1128.4301                 | 4                      | YCNSTQLF             | [Hex]5[HexNAc]4[Fuc]1[NeuAc]2 |
| 3+ | 1099.0963                  | 1099.0914                 | 4                      | YCNSTQLF             | [Hex]5[HexNAc]5[Fuc]1[NeuAc]1 |
| 3+ | 1196.1289                  | 1196.1232                 | 5                      | YCNSTQLF             | [Hex]5[HexNAc]5[Fuc]1[NeuAc]2 |
| 2+ | 1205.9674                  | 1205.9642                 | 3                      | YCNSTQLF             | [Hex]6[HexNAc]2               |
| 3+ | 1153.1130                  | 1153.1090                 | 3                      | YCNSTQLF             | [Hex]6[HexNAc]5[Fuc]1[NeuAc]1 |
| 3+ | 1250.1457                  | 1250.1408                 | 4                      | YCNSTQLF             | [Hex]6[HexNAc]5[Fuc]1[NeuAc]2 |
| 3+ | 1347.1658                  | 1347.1726                 | 5                      | YCNSTQLF             | [Hex]6[HexNAc]5[Fuc]1[NeuAc]3 |
| 3+ | 1317.8451                  | 1317.8340                 | 8                      | YCNSTQLF             | [Hex]6[HexNAc]6[Fuc]1[NeuAc]2 |
| 2+ | 1286.9923                  | 1286.9906                 | 1                      | YCNSTQLF             | [Hex]7[HexNAc]2               |
| 2+ | 1368.0185                  | 1368.0170                 | 1                      | YCNSTQLF             | [Hex]8[HexNAc]2               |
| 2+ | 1449.0436                  | 1449.0434                 | 0.1                    | YCNSTQLF             | [Hex]9[HexNAc]2               |
|    |                            |                           |                        |                      |                               |
| 3+ | 928.6992                   | 928.6947                  | 5                      | YCNSTQLF             | [Hex]4[HexNAc]4[NeuAc]1       |
|    |                            |                           |                        |                      |                               |
| 1+ | 1032.4520                  | 1032.4455                 | 6                      | YCNSTQLF             | non-glycosylated              |
|    |                            |                           |                        |                      |                               |
| 4+ | 1238.0040                  | 1238.0026                 | 1                      | NNNTEGSNNTEGNTITLPCR | [Hex]6[HexNAc]8[Fuc]1         |
| 4+ | 1160.4592                  | 1160.4616                 | 2                      | NNNTEGSNNTEGNTITLPCR | [Hex]10[HexNAc]4              |

| CS | Experimental<br><i>m/z</i> | Theoretical<br><i>m/z</i> | Mass<br>Error<br>(ppm) | Peptide Sequence       | Glycan                        |
|----|----------------------------|---------------------------|------------------------|------------------------|-------------------------------|
| 3+ | 1101.1274                  | 1101.1300                 | 2                      | NNNTEGSSNNTTEGNTITLPCR | [Hex]3[HexNAc]3               |
| 3+ | 1149.8181                  | 1149.8160                 | 2                      | NNNTEGSSNNTTEGNTITLPCR | [Hex]3[HexNAc]3[Fuc]1         |
| 3+ | 1217.5049                  | 1217.5091                 | 3                      | NNNTEGSSNNTTEGNTITLPCR | [Hex]3[HexNAc]4[Fuc]1         |
| 3+ | 1087.4603                  | 1087.4545                 | 5                      | NNNTEGSSNNTTEGNTITLPCR | [Hex]4[HexNAc]2               |
| 3+ | 1368.5598                  | 1368.5585                 | 1                      | NNNTEGSSNNTTEGNTITLPCR | [Hex]4[HexNAc]4[Fuc]1[NeuAc]1 |
| 3+ | 1339.2146                  | 1339.2198                 | 4                      | NNNTEGSSNNTTEGNTITLPCR | [Hex]4[HexNAc]5[Fuc]1         |
| 3+ | 1141.4689                  | 1141.4721                 | 3                      | NNNTEGSSNNTTEGNTITLPCR | [Hex]5[HexNAc]2               |
| 3+ | 1519.6141                  | 1519.6079                 | 4                      | NNNTEGSSNNTTEGNTITLPCR | [Hex]5[HexNAc]4[Fuc]1[NeuAc]2 |
|    |                            |                           |                        |                        |                               |
| 3+ | 736.0012                   | 735.9978                  | 5                      | NNNTEGSSNNTTEGNTITLPCR | non-glycosylated              |
|    |                            |                           |                        |                        |                               |
| 2+ | 769.4004                   | 769.3982                  | 3                      | CSSNITGLLLTR           | [HexNAc]                      |
| 3+ | 513.2685                   | 513.2679                  | 1                      | CSSNITGLLLTR           | [HexNAc]                      |
|    |                            |                           |                        |                        |                               |
| 2+ | 1114.0208                  | 1114.0171                 | 3                      | CSSNITGLLLTR           | [Hex]3[HexNAc]2               |
| 2+ | 1187.0517                  | 1187.0460                 | 5                      | CSSNITGLLLTR           | [Hex]3[HexNAc]2[Fuc]1         |
| 2+ | 1215.5603                  | 1215.5568                 | 3                      | CSSNITGLLLTR           | [Hex]3[HexNAc]3               |
| 2+ | 1288.5873                  | 1288.5857                 | 1                      | CSSNITGLLLTR           | [Hex]3[HexNAc]3[Fuc]1         |
| 2+ | 1317.1003                  | 1317.0964                 | 3                      | CSSNITGLLLTR           | [Hex]3[HexNAc]4               |
| 2+ | 1390.1280                  | 1390.1254                 | 2                      | CSSNITGLLLTR           | [Hex]3[HexNAc]4[Fuc]1         |
| 2+ | 1491.6651                  | 1491.6651                 | 0                      | CSSNITGLLLTR           | [Hex]3[HexNAc]5[Fuc]1         |
| 2+ | 1369.6103                  | 1369.6121                 | 1                      | CSSNITGLLLTR           | [Hex]4[HexNAc]3[Fuc]1         |
| 2+ | 1442.1272                  | 1442.1309                 | 3                      | CSSNITGLLLTR           | [Hex]4[HexNAc]3[NeuAc]1       |
| 2+ | 1398.1227                  | 1398.1229                 | 0.1                    | CSSNITGLLLTR           | [Hex]4[HexNAc]4               |
| 2+ | 1471.1520                  | 1471.1518                 | 0.1                    | CSSNITGLLLTR           | [Hex]4[HexNAc]4 [Fuc]1        |
| 2+ | 1616.7023                  | 1616.6995                 | 2                      | CSSNITGLLLTR           | [Hex]4[HexNAc]4[Fuc]1[NeuAc]1 |
| 2+ | 1572.7031                  | 1572.6915                 | 7                      | CSSNITGLLLTR           | [Hex]4[HexNAc]5[Fuc]1         |
| 2+ | 1624.7022                  | 1624.6970                 | 3                      | CSSNITGLLLTR           | [Hex]5 [HexNAc]4 [NeuAc]1     |
| 2+ | 1276.0701                  | 1276.0699                 | 0.2                    | CSSNITGLLLTR           | [Hex]5[HexNAc]2               |
| 2+ | 1377.6120                  | 1377.6096                 | 2                      | CSSNITGLLLTR           | [Hex]5[HexNAc]3               |
| 2+ | 1523.1645                  | 1523.1573                 | 5                      | CSSNITGLLLTR           | [Hex]5[HexNAc]3 [NeuAc]1      |
| 2+ | 1450.6438                  | 1450.6385                 | 4                      | CSSNITGLLLTR           | [Hex]5[HexNAc]3[Fuc]1         |
| 2+ | 1552.1776                  | 1552.1782                 | 0.4                    | CSSNITGLLLTR           | [Hex]5[HexNAc]4[Fuc]1         |
| 2+ | 1697.7271                  | 1697.7259                 | 1                      | CSSNITGLLLTR           | [Hex]5[HexNAc]4[Fuc]1[NeuAc]1 |
| 2+ | 1843.2748                  | 1843.2736                 | 1                      | CSSNITGLLLTR           | [Hex]5[HexNAc]4[Fuc]1[NeuAc]2 |
| 2+ | 1357.0941                  | 1357.0963                 | 2                      | CSSNITGLLLTR           | [Hex]6[HexNAc]2               |
| 2+ | 1458.6414                  | 1458.6360                 | 4                      | CSSNITGLLLTR           | [Hex]6[HexNAc]3               |
| 2+ | 1531.6719                  | 1531.6649                 | 5                      | CSSNITGLLLTR           | [Hex]6[HexNAc]3[Fuc]1         |
| 2+ | 1438.1242                  | 1438.1227                 | 1                      | CSSNITGLLLTR           | [Hex]7[HexNAc]2               |
| 2+ | 1519.1507                  | 1519.1491                 | 1                      | CSSNITGLLLTR           | [Hex]8[HexNAc]2               |
| 2+ | 1600.1779                  | 1600.1755                 | 1                      | CSSNITGLLLTR           | [Hex]9[HexNAc]2               |
|    |                            |                           |                        |                        |                               |
| 3+ | 797.0316                   | 797.0314                  | 0.3                    | CSSNITGLLLTR           | [Hex]4[HexNAc]2               |
| 3+ | 864.7262                   | 864.7245                  | 2                      | CSSNITGLLLTR           | [Hex]4[HexNAc]3               |
| 3+ | 1010.4395                  | 1010.4423                 | 3                      | CSSNITGLLLTR           | [Hex]4[HexNAc]3[Fuc]1[NeuAc]1 |
| 3+ | 1029.4552                  | 1029.4495                 | 6                      | CSSNITGLLLTR           | [Hex]4[HexNAc]4[NeuAc]1       |
| 3+ | 1000.1151                  | 1000.1108                 | 4                      | CSSNITGLLLTR           | [Hex]4[HexNAc]5               |
| 3+ | 1145.8310                  | 1145.8286                 | 2                      | CSSNITGLLLTR           | [Hex]4[HexNAc]5[Fuc]1[NeuAc]1 |
| 3+ | 986.4353                   | 986.4353                  | 0                      | CSSNITGLLLTR           | [Hex]5[HexNAc]4               |
| 3+ | 1083.4710                  | 1083.4671                 | 4                      | CSSNITGLLLTR           | [Hex]5[HexNAc]4[NeuAc]1       |



| CS | Experimental<br><i>m/z</i> | Theoretical<br><i>m/z</i> | Mass<br>Error<br>(ppm) | Peptide Sequence     | Glycan                        |
|----|----------------------------|---------------------------|------------------------|----------------------|-------------------------------|
| 3+ | 1102.8153                  | 1102.8144                 | 1                      | CSSNITGLLLTR         | [Hex]5[HexNAc]5[Fuc]1         |
| 3+ | 1199.8467                  | 1199.8462                 | 0.4                    | CSSNITGLLLTR         | [Hex]5[HexNAc]5[Fuc]1[NeuAc]1 |
| 3+ | 1296.8835                  | 1296.8780                 | 4                      | CSSNITGLLLTR         | [Hex]5[HexNAc]5[Fuc]1[NeuAc]2 |
| 3+ | 1267.5346                  | 1267.5393                 | 4                      | CSSNITGLLLTR         | [Hex]5[HexNAc]6[Fuc]1[NeuAc]1 |
| 3+ | 1253.8641                  | 1253.8638                 | 0.2                    | CSSNITGLLLTR         | [Hex]6[HexNAc]5[Fuc]1[NeuAc]1 |
| 3+ | 1350.8979                  | 1350.8956                 | 2                      | CSSNITGLLLTR         | [Hex]6[HexNAc]5[Fuc]1[NeuAc]2 |
| 3+ | 1447.9354                  | 1447.9274                 | 6                      | CSSNITGLLLTR         | [Hex]6[HexNAc]5[Fuc]1[NeuAc]3 |
| 3+ | 1389.2545                  | 1389.2500                 | 3                      | CSSNITGLLLTR         | [Hex]6[HexNAc]7[Fuc]1[NeuAc]1 |
| 3+ | 1010.4466                  | 1010.4423                 | 4                      | CSSNITGLLLTR         | [Hex]4[HexNAc]3[Fuc]1[NeuAc]1 |
| 3+ | 1064.4631                  | 1064.4599                 | 3                      | CSSNITGLLLTR         | [Hex]5[HexNAc]3[Fuc]1[NeuAc]1 |
| 3+ | 1156.8424                  | 1156.8319                 | 9                      | CSSNITGLLLTR         | [Hex]6[HexNAc]5[Fuc]1         |
| 3+ | 1069.7939                  | 1069.7915                 | 2                      | CSSNITGLLLTR         | [Hex]6[HexNAc]3[NeuAc]1       |
| 3+ | 1170.5039                  | 1170.5074                 | 3                      | CSSNITGLLLTR         | [Hex]5[HexNAc]6[Fuc]1         |
| 3+ | 1118.4862                  | 1118.4775                 | 8                      | CSSNITGLLLTR         | [Hex]6[HexNAc]3[Fuc]1[NeuAc]1 |
| 3+ | 1213.5266                  | 1213.5217                 | 4                      | CSSNITGLLLTR         | [Hex]4[HexNAc]6[Fuc]1[NeuAc]1 |
|    |                            |                           |                        |                      |                               |
| 4+ | 1104.7102                  | 1104.7065                 | 3                      | CSSNITGLLLTR         | [Hex]7[HexNAc]6[Fuc]1[NeuAc]2 |
| 4+ | 1177.4782                  | 1177.4804                 | 2                      | CSSNITGLLLTR         | [Hex]7[HexNAc]6[Fuc]1[NeuAc]3 |
|    |                            |                           |                        |                      |                               |
| 2+ | 667.8588                   | 667.8585                  | 0.4                    | CSSNITGLLLTR         | non-glycosylated              |
|    |                            |                           |                        |                      |                               |
| 3+ | 765.6827                   | 765.6817                  | 1                      | DGGINENGTEIFRPGGGDMR | [HexNAc]                      |
|    |                            |                           |                        |                      |                               |
| 3+ | 990.1000                   | 990.0960                  | 4                      | DGGINENGTEIFRPGGGDMR | [Hex]2[HexNAc]2[Fuc]1         |
| 3+ | 995.4287                   | 995.4277                  | 1                      | DGGINENGTEIFRPGGGDMR | [Hex]3[HexNAc]2               |
| 3+ | 1044.1166                  | 1044.1136                 | 3                      | DGGINENGTEIFRPGGGDMR | [Hex]3[HexNAc]2[Fuc]1         |
| 3+ | 1111.8081                  | 1111.8068                 | 1                      | DGGINENGTEIFRPGGGDMR | [Hex]3[HexNAc]3[Fuc]1         |
| 3+ | 1130.8135                  | 1130.8139                 | 0.4                    | DGGINENGTEIFRPGGGDMR | [Hex]3[HexNAc]4               |
| 3+ | 1179.5011                  | 1179.4999                 | 1                      | DGGINENGTEIFRPGGGDMR | [Hex]3[HexNAc]4[Fuc]1         |
| 3+ | 1247.1933                  | 1247.1930                 | 0.2                    | DGGINENGTEIFRPGGGDMR | [Hex]3[HexNAc]5[Fuc]1         |
| 3+ | 1049.4413                  | 1049.4453                 | 4                      | DGGINENGTEIFRPGGGDMR | [Hex]4[HexNAc]2               |
| 3+ | 1165.8262                  | 1165.8244                 | 2                      | DGGINENGTEIFRPGGGDMR | [Hex]4[HexNAc]3[Fuc]1         |
| 3+ | 1262.8560                  | 1262.8561                 | 0.1                    | DGGINENGTEIFRPGGGDMR | [Hex]4[HexNAc]3[Fuc]1[NeuAc]1 |
| 3+ | 1184.8310                  | 1184.8315                 | 0.4                    | DGGINENGTEIFRPGGGDMR | [Hex]4[HexNAc]4               |
| 3+ | 1233.5211                  | 1233.5175                 | 3                      | DGGINENGTEIFRPGGGDMR | [Hex]4[HexNAc]4 [Fuc]1        |
| 3+ | 1330.5510                  | 1330.5493                 | 1                      | DGGINENGTEIFRPGGGDMR | [Hex]4[HexNAc]4[Fuc]1[NeuAc]1 |
| 3+ | 1301.2101                  | 1301.2106                 | 0.4                    | DGGINENGTEIFRPGGGDMR | [Hex]4[HexNAc]5[Fuc]1         |
| 3+ | 1398.2425                  | 1398.2424                 | 0.1                    | DGGINENGTEIFRPGGGDMR | [Hex]4[HexNAc]5[Fuc]1[NeuAc]1 |
| 3+ | 1368.9019                  | 1368.9037                 | 1                      | DGGINENGTEIFRPGGGDMR | [Hex]4[HexNAc]6[Fuc]1         |
| 3+ | 1465.9354                  | 1465.9356                 | 0.1                    | DGGINENGTEIFRPGGGDMR | [Hex]4[HexNAc]6[Fuc]1[NeuAc]1 |
| 3+ | 1103.4680                  | 1103.4629                 | 5                      | DGGINENGTEIFRPGGGDMR | [Hex]5[HexNAc]2               |
| 3+ | 1238.8519                  | 1238.8491                 | 2                      | DGGINENGTEIFRPGGGDMR | [Hex]5[HexNAc]4               |
| 3+ | 1287.5359                  | 1287.5351                 | 1                      | DGGINENGTEIFRPGGGDMR | [Hex]5[HexNAc]4[Fuc]1         |
| 3+ | 1384.5672                  | 1384.5669                 | 0.2                    | DGGINENGTEIFRPGGGDMR | [Hex]5[HexNAc]4[Fuc]1[NeuAc]1 |
| 3+ | 1481.5991                  | 1481.5987                 | 0.3                    | DGGINENGTEIFRPGGGDMR | [Hex]5[HexNAc]4[Fuc]1[NeuAc]2 |
| 3+ | 1355.2325                  | 1355.2282                 | 3                      | DGGINENGTEIFRPGGGDMR | [Hex]5[HexNAc]5[Fuc]1         |
| 3+ | 1452.2590                  | 1452.2600                 | 1                      | DGGINENGTEIFRPGGGDMR | [Hex]5[HexNAc]5[Fuc]1[NeuAc]1 |
| 3+ | 1549.2908                  | 1549.2918                 | 1                      | DGGINENGTEIFRPGGGDMR | [Hex]5[HexNAc]5[Fuc]1[NeuAc]2 |
| 3+ | 1422.9227                  | 1422.9213                 | 1                      | DGGINENGTEIFRPGGGDMR | [Hex]5[HexNAc]6[Fuc]1         |
| 3+ | 1519.9531                  | 1519.9531                 | 0                      | DGGINENGTEIFRPGGGDMR | [Hex]5[HexNAc]6[Fuc]1[NeuAc]1 |

| CS | Experimental<br><i>m/z</i> | Theoretical<br><i>m/z</i> | Mass<br>Error<br>(ppm) | Peptide Sequence     | Glycan                        |
|----|----------------------------|---------------------------|------------------------|----------------------|-------------------------------|
| 3+ | 1616.9858                  | 1616.9850                 | 0.5                    | DGGINENGTEIFRPGGGDMR | [Hex]5[HexNAc]6[Fuc]1[NeuAc]2 |
| 3+ | 1157.4751                  | 1157.4805                 | 5                      | DGGINENGTEIFRPGGGDMR | [Hex]6[HexNAc]2               |
| 3+ | 1370.8915                  | 1370.8914                 | 0.1                    | DGGINENGTEIFRPGGGDMR | [Hex]6[HexNAc]3[Fuc]1[NeuAc]1 |
| 3+ | 1506.2787                  | 1506.2776                 | 1                      | DGGINENGTEIFRPGGGDMR | [Hex]6[HexNAc]5[Fuc]1[NeuAc]1 |
| 3+ | 1603.3107                  | 1603.3094                 | 1                      | DGGINENGTEIFRPGGGDMR | [Hex]6[HexNAc]5[Fuc]1[NeuAc]2 |
| 3+ | 1700.3427                  | 1700.3412                 | 1                      | DGGINENGTEIFRPGGGDMR | [Hex]6[HexNAc]5[Fuc]1[NeuAc]3 |
| 3+ | 1476.9283                  | 1476.9390                 | 7                      | DGGINENGTEIFRPGGGDMR | [Hex]6[HexNAc]6[Fuc]1         |
| 3+ | 1573.9708                  | 1573.9707                 | 0.1                    | DGGINENGTEIFRPGGGDMR | [Hex]6[HexNAc]6[Fuc]1[NeuAc]1 |
| 3+ | 1641.6663                  | 1641.6639                 | 1                      | DGGINENGTEIFRPGGGDMR | [Hex]6[HexNAc]7[Fuc]1[NeuAc]1 |
| 3+ | 1627.9815                  | 1627.9884                 | 4                      | DGGINENGTEIFRPGGGDMR | [Hex]7[HexNAc]6[Fuc]1[NeuAc]1 |
| 3+ | 1822.0462                  | 1822.0520                 | 3                      | DGGINENGTEIFRPGGGDMR | [Hex]7[HexNAc]6[Fuc]1[NeuAc]3 |
| 3+ | 1598.6360                  | 1598.6497                 | 9                      | DGGINENGTEIFRPGGGDMR | [Hex]7[HexNAc]7[Fuc]1         |
|    |                            |                           |                        |                      |                               |
| 4+ | 986.4173                   | 986.4164                  | 1                      | DGGINENGTEIFRPGGGDMR | [Hex]3[HexNAc]6[Fuc]1         |
| 4+ | 1253.5088                  | 1253.5037                 | 4                      | DGGINENGTEIFRPGGGDMR | [Hex]6[HexNAc]6[Fuc]1[NeuAc]2 |
| 4+ | 1326.2777                  | 1326.2776                 | 0.1                    | DGGINENGTEIFRPGGGDMR | [Hex]6[HexNAc]6[Fuc]1[NeuAc]3 |
| 4+ | 1158.7275                  | 1158.7259                 | 1                      | DGGINENGTEIFRPGGGDMR | [Hex]6[HexNAc]7[Fuc]1         |
| 4+ | 1304.2756                  | 1304.2736                 | 2                      | DGGINENGTEIFRPGGGDMR | [Hex]6[HexNAc]7[Fuc]1[NeuAc]2 |
| 4+ | 1294.0160                  | 1294.0169                 | 1                      | DGGINENGTEIFRPGGGDMR | [Hex]7[HexNAc]6[Fuc]1[NeuAc]2 |
| 4+ | 1366.7964                  | 1366.7908                 | 4                      | DGGINENGTEIFRPGGGDMR | [Hex]7[HexNAc]6[Fuc]1[NeuAc]3 |
| 4+ | 1439.5645                  | 1439.5647                 | 0.1                    | DGGINENGTEIFRPGGGDMR | [Hex]7[HexNAc]6[Fuc]1[NeuAc]4 |
| 4+ | 1272.0013                  | 1272.0129                 | 9                      | DGGINENGTEIFRPGGGDMR | [Hex]7[HexNAc]7[Fuc]1[NeuAc]1 |
| 4+ | 1417.5573                  | 1417.5606                 | 2                      | DGGINENGTEIFRPGGGDMR | [Hex]7[HexNAc]7[Fuc]1[NeuAc]3 |
|    |                            |                           |                        |                      |                               |
| 2+ | 1046.4789                  | 1046.4793                 | 0.4                    | DGGINENGTEIFRPGGGDMR | non-glycosylated              |
|    |                            |                           |                        |                      |                               |
| 3+ | 1427.5887                  | 1427.5904                 | 1                      | LICTTAVPWNASWSNK     | [Hex]10[HexNAc]4              |
| 3+ | 1549.2945                  | 1549.3010                 | 4                      | LICTTAVPWNASWSNK     | [Hex]11[HexNAc]5              |
| 3+ | 1603.3133                  | 1603.3187                 | 3                      | LICTTAVPWNASWSNK     | [Hex]12[HexNAc]5              |
| 3+ | 1671.0140                  | 1671.0118                 | 1                      | LICTTAVPWNASWSNK     | [Hex]12[HexNAc]6              |
|    |                            |                           |                        |                      |                               |
| 4+ | 1111.4589                  | 1111.4578                 | 1                      | LICTTAVPWNASWSNK     | [Hex]11[HexNAc]4              |
| 4+ | 1300.2829                  | 1300.2818                 | 1                      | LICTTAVPWNASWSNK     | [Hex]11[HexNAc]7[Fuc]1        |
| 4+ | 1151.9696                  | 1151.9710                 | 1                      | LICTTAVPWNASWSNK     | [Hex]12[HexNAc]4              |
| 4+ | 1275.5202                  | 1275.5147                 | 4                      | LICTTAVPWNASWSNK     | [Hex]12[HexNAc]5[NeuAc]1      |
| 4+ | 1326.2856                  | 1326.2845                 | 1                      | LICTTAVPWNASWSNK     | [Hex]12[HexNAc]6[NeuAc]1      |
| 4+ | 1192.4902                  | 1192.4842                 | 5                      | LICTTAVPWNASWSNK     | [Hex]13[HexNAc]4              |
| 4+ | 1330.5500                  | 1330.5383                 | 9                      | LICTTAVPWNASWSNK     | [Hex]13[HexNAc]6[Fuc]1        |
| 4+ | 1366.7928                  | 1366.7977                 | 4                      | LICTTAVPWNASWSNK     | [Hex]13[HexNAc]6[NeuAc]1      |
| 4+ | 1439.5616                  | 1439.5716                 | 7                      | LICTTAVPWNASWSNK     | [Hex]13[HexNAc]6[NeuAc]2      |
|    |                            |                           |                        |                      |                               |
| 2+ | 1370.6212                  | 1370.6177                 | 3                      | LICTTAVPWNASWSNK     | [Hex]3[HexNAc]2               |
| 2+ | 1545.1848                  | 1545.1863                 | 1                      | LICTTAVPWNASWSNK     | [Hex]3[HexNAc]3[Fuc]1         |
| 2+ | 1646.7231                  | 1646.7260                 | 2                      | LICTTAVPWNASWSNK     | [Hex]3[HexNAc]4[Fuc]1         |
| 2+ | 1532.6691                  | 1532.6705                 | 1                      | LICTTAVPWNASWSNK     | [Hex]5[HexNAc]2               |
|    |                            |                           |                        |                      |                               |
| 3+ | 981.7777                   | 981.7740                  | 4                      | LICTTAVPWNASWSNK     | [Hex]3[HexNAc]3               |
| 3+ | 1049.4709                  | 1049.4671                 | 4                      | LICTTAVPWNASWSNK     | [Hex]3[HexNAc]4               |
| 3+ | 968.1006                   | 968.0985                  | 2                      | LICTTAVPWNASWSNK     | [Hex]4[HexNAc]2               |
| 3+ | 1181.5111                  | 1181.5094                 | 1                      | LICTTAVPWNASWSNK     | [Hex]4[HexNAc]3[Fuc]1[NeuAc]1 |

| CS | Experimental<br><i>m/z</i> | Theoretical<br><i>m/z</i> | Mass<br>Error<br>(ppm) | Peptide Sequence  | Glycan                        |
|----|----------------------------|---------------------------|------------------------|-------------------|-------------------------------|
| 3+ | 1152.1747                  | 1152.1707                 | 3                      | LICTTAVPWNASWSNK  | [Hex]4[HexNAc]4[Fuc]1         |
| 3+ | 1249.2062                  | 1249.2025                 | 3                      | LICTTAVPWNASWSNK  | [Hex]4[HexNAc]4[Fuc]1[NeuAc]1 |
| 3+ | 1219.8685                  | 1219.8638                 | 4                      | LICTTAVPWNASWSNK  | [Hex]4[HexNAc]5[Fuc]1         |
| 3+ | 1316.8940                  | 1316.8956                 | 1                      | LICTTAVPWNASWSNK  | [Hex]4[HexNAc]5[Fuc]1[NeuAc]1 |
| 3+ | 1089.8129                  | 1089.8092                 | 3                      | LICTTAVPWNASWSNK  | [Hex]5[HexNAc]3               |
| 3+ | 1206.1843                  | 1206.1883                 | 3                      | LICTTAVPWNASWSNK  | [Hex]5[HexNAc]4[Fuc]1         |
| 3+ | 1303.2226                  | 1303.2201                 | 2                      | LICTTAVPWNASWSNK  | [Hex]5[HexNAc]4[Fuc]1[NeuAc]1 |
| 3+ | 1400.2521                  | 1400.2519                 | 0.1                    | LICTTAVPWNASWSNK  | [Hex]5[HexNAc]4[Fuc]1[NeuAc]2 |
| 3+ | 1370.9166                  | 1370.9132                 | 2                      | LICTTAVPWNASWSNK  | [Hex]5[HexNAc]5[Fuc]1[NeuAc]1 |
| 3+ | 1535.6456                  | 1535.6382                 | 5                      | LICTTAVPWNASWSNK  | [Hex]5[HexNAc]6[Fuc]1[NeuAc]2 |
| 3+ | 1076.1424                  | 1076.1337                 | 8                      | LICTTAVPWNASWSNK  | [Hex]6[HexNAc]2               |
| 3+ | 1327.9011                  | 1327.8990                 | 2                      | LICTTAVPWNASWSNK  | [Hex]6[HexNAc]5[Fuc]1         |
|    |                            |                           |                        |                   |                               |
| 4+ | 874.6427                   | 874.6365                  | 7                      | LICTTAVPWNASWSNK  | [Hex]3[HexNAc]5[Fuc]1         |
| 4+ | 1101.2161                  | 1101.2106                 | 5                      | LICTTAVPWNASWSNK  | [Hex]5[HexNAc]5[Fuc]1[NeuAc]2 |
|    |                            |                           |                        |                   |                               |
| 3+ | 1084.4756                  | 1084.4776                 | 2                      | LICTTAVPWNASWSNK* | [Hex]4[HexNAc]3[Fuc]1         |
| 3+ | 1303.2266                  | 1303.2201                 | 5                      | LICTTAVPWNASWSNK* | [Hex]5[HexNAc]4[Fuc]1[NeuAc]1 |
| 3+ | 1400.2534                  | 1400.2519                 | 1                      | LICTTAVPWNASWSNK* | [Hex]5[HexNAc]4[Fuc]1[NeuAc]2 |
| 3+ | 1467.9420                  | 1467.9450                 | 2                      | LICTTAVPWNASWSNK* | [Hex]5[HexNAc]5[Fuc]1[NeuAc]2 |
| 3+ | 1560.3262                  | 1560.3171                 | 6                      | LICTTAVPWNASWSNK* | [Hex]6[HexNAc]7[Fuc]1[NeuAc]1 |
| 3+ | 1837.7402                  | 1837.7370                 | 2                      | LICTTAVPWNASWSNK* | [Hex]7[HexNAc]6[Fuc]1[NeuAc]4 |
|    |                            |                           |                        |                   |                               |
| 4+ | 904.8906                   | 904.8930                  | 3                      | LICTTAVPWNASWSNK* | [Hex]5[HexNAc]4[Fuc]1         |
| 4+ | 955.6655                   | 955.6629                  | 3                      | LICTTAVPWNASWSNK* | [Hex]5[HexNAc]5[Fuc]1         |
| 4+ | 1028.4354                  | 1028.4367                 | 1                      | LICTTAVPWNASWSNK* | [Hex]5[HexNAc]5[Fuc]1[NeuAc]1 |
| 4+ | 1151.9818                  | 1151.9804                 | 1                      | LICTTAVPWNASWSNK* | [Hex]5[HexNAc]6[Fuc]1[NeuAc]2 |
|    |                            |                           |                        |                   |                               |
| 2+ | 924.4626                   | 924.4591                  | 4                      | LICTTAVPWNASWSNK  | non-glycosylated              |
|    |                            |                           |                        |                   |                               |
| 2+ | 620.7579                   | 620.7561                  | 3                      | SNK               | [Hex]3[HexNAc]2               |
| 2+ | 795.3279                   | 795.3248                  | 4                      | SNK               | [Hex]3[HexNAc]3[Fuc]1         |
| 2+ | 701.7850                   | 701.7826                  | 3                      | SNK               | [Hex]4[HexNAc]2               |
| 2+ | 741.7634                   | 741.7657                  | 3                      | SNK               | [Hex]4[HexNAc]2[PO3]1         |
| 2+ | 803.3154                   | 803.3222                  | 8                      | SNK               | [Hex]4[HexNAc]3               |
| 2+ | 977.8966                   | 977.8909                  | 6                      | SNK               | [Hex]4[HexNAc]4[Fuc]1         |
| 2+ | 1123.4432                  | 1123.4386                 | 4                      | SNK               | [Hex]4[HexNAc]4[Fuc]1[NeuAc]1 |
| 2+ | 782.8118                   | 782.8089                  | 4                      | SNK               | [Hex]5[HexNAc]2               |
| 2+ | 855.8380                   | 855.8379                  | 0.1                    | SNK               | [Hex]5[HexNAc]2[Fuc]1         |
| 2+ | 822.7968                   | 822.7921                  | 6                      | SNK               | [Hex]5[HexNAc]2[PO3]1         |
| 2+ | 957.3720                   | 957.3776                  | 6                      | SNK               | [Hex]5[HexNAc]3[Fuc]1         |
| 2+ | 985.8851                   | 985.8883                  | 3                      | SNK               | [Hex]5[HexNAc]4               |
| 2+ | 1160.4655                  | 1160.4570                 | 7                      | SNK               | [Hex]5[HexNAc]5[Fuc]1         |
| 2+ | 863.8396                   | 863.8354                  | 5                      | SNK               | [Hex]6[HexNAc]2               |
| 2+ | 903.8223                   | 903.8185                  | 4                      | SNK               | [Hex]6[HexNAc]2[PO3]1         |
| 2+ | 1241.4860                  | 1241.4834                 | 2                      | SNK               | [Hex]6[HexNAc]5[Fuc]1         |
| 2+ | 1387.0353                  | 1387.0311                 | 3                      | SNK               | [Hex]6[HexNAc]5[Fuc]1[NeuAc]1 |
| 2+ | 944.8681                   | 944.8618                  | 7                      | SNK               | [Hex]7[HexNAc]2               |
| 2+ | 1025.8927                  | 1025.8882                 | 4                      | SNK               | [Hex]8[HexNAc]2               |
| 2+ | 1106.9109                  | 1106.9146                 | 3                      | SNK               | [Hex]9[HexNAc]2               |

| CS | Experimental<br><i>m/z</i> | Theoretical<br><i>m/z</i> | Mass<br>Error<br>(ppm) | Peptide Sequence       | Glycan                        |
|----|----------------------------|---------------------------|------------------------|------------------------|-------------------------------|
|    |                            |                           |                        |                        |                               |
| 3+ | 706.2829                   | 706.2806                  | 3                      | SNK                    | [Hex]5[HexNAc]4[Fuc]1         |
| 3+ | 803.3154                   | 803.3124                  | 4                      | SNK                    | [Hex]5[HexNAc]4[Fuc]1[NeuAc]1 |
| 3+ | 900.3485                   | 900.3442                  | 5                      | SNK                    | [Hex]5[HexNAc]4[Fuc]1[NeuAc]2 |
| 3+ | 1046.7369                  | 1046.7339                 | 3                      | SNK                    | [Hex]7[HexNAc]6[Fuc]1[NeuAc]1 |
| 3+ | 1143.7685                  | 1143.7657                 | 2                      | SNK                    | [Hex]7[HexNAc]6[Fuc]1[NeuAc]2 |
|    |                            |                           |                        |                        |                               |
| 3+ | 633.6112                   | 633.6115                  | 0.5                    | IWNNMTWMEWER           | [HexNAc]                      |
|    |                            |                           |                        |                        |                               |
| 2+ | 1051.4502                  | 1051.4534                 | 3                      | IWNNMTWMEWER           | [HexNAc]2                     |
| 2+ | 1286.5365                  | 1286.5351                 | 1                      | IWNNMTWMEWER           | [Hex]2[HexNAc]2[Fuc]1         |
| 2+ | 1388.0765                  | 1388.0748                 | 1                      | IWNNMTWMEWER           | [Hex]2[HexNAc]3[Fuc]1         |
| 2+ | 1294.5307                  | 1294.5326                 | 1                      | IWNNMTWMEWER           | [Hex]3[HexNAc]2               |
| 2+ | 1367.5654                  | 1367.5615                 | 3                      | IWNNMTWMEWER           | [Hex]3[HexNAc]2[Fuc]1         |
| 2+ | 1469.1042                  | 1469.1012                 | 2                      | IWNNMTWMEWER           | [Hex]3[HexNAc]3[Fuc]1         |
| 2+ | 1570.6433                  | 1570.6409                 | 2                      | IWNNMTWMEWER           | [Hex]3[HexNAc]4[Fuc]1         |
| 2+ | 1695.6759                  | 1695.6753                 | 0.4                    | IWNNMTWMEWER           | [Hex]4[HexNAc]3[Fuc]1[NeuAc]1 |
| 2+ | 1456.5898                  | 1456.5854                 | 3                      | IWNNMTWMEWER           | [Hex]5[HexNAc]2               |
| 2+ | 1577.5968                  | 1577.5949                 | 1                      | IWNNMTWMEWER           | [Hex]6[HexNAc]2[PO3]1         |
|    |                            |                           |                        |                        |                               |
| 3+ | 1115.1267                  | 1115.1228                 | 3                      | IWNNMTWMEWER           | [Hex]3[HexNAc]5[Fuc]1         |
| 3+ | 1101.4485                  | 1101.4473                 | 1                      | IWNNMTWMEWER           | [Hex]4[HexNAc]4 [Fuc]1        |
| 3+ | 1198.4819                  | 1198.4791                 | 2                      | IWNNMTWMEWER           | [Hex]4[HexNAc]4[Fuc]1[NeuAc]1 |
| 3+ | 1169.1480                  | 1169.1404                 | 7                      | IWNNMTWMEWER           | [Hex]4[HexNAc]5[Fuc]1         |
| 3+ | 1266.1757                  | 1266.1722                 | 3                      | IWNNMTWMEWER           | [Hex]4[HexNAc]5[Fuc]1[NeuAc]1 |
| 3+ | 1333.8655                  | 1333.8654                 | 0.1                    | IWNNMTWMEWER           | [Hex]4[HexNAc]6[Fuc]1[NeuAc]1 |
| 3+ | 1155.4693                  | 1155.4649                 | 4                      | IWNNMTWMEWER           | [Hex]5[HexNAc]4[Fuc]1         |
| 3+ | 1252.4997                  | 1252.4967                 | 2                      | IWNNMTWMEWER           | [Hex]5[HexNAc]4[Fuc]1[NeuAc]1 |
| 3+ | 1349.5287                  | 1349.5285                 | 0.1                    | IWNNMTWMEWER           | [Hex]5[HexNAc]4[Fuc]1[NeuAc]2 |
| 3+ | 1320.1911                  | 1320.1898                 | 1                      | IWNNMTWMEWER           | [Hex]5[HexNAc]5[Fuc]1[NeuAc]1 |
| 3+ | 1417.2213                  | 1417.2216                 | 0.2                    | IWNNMTWMEWER           | [Hex]5[HexNAc]5[Fuc]1[NeuAc]2 |
| 3+ | 1387.8872                  | 1387.8829                 | 3                      | IWNNMTWMEWER           | [Hex]5[HexNAc]6[Fuc]1[NeuAc]1 |
| 3+ | 1374.2130                  | 1374.2074                 | 4                      | IWNNMTWMEWER           | [Hex]6[HexNAc]5[Fuc]1[NeuAc]1 |
| 3+ | 1568.2686                  | 1568.2710                 | 2                      | IWNNMTWMEWER           | [Hex]6[HexNAc]5[Fuc]1[NeuAc]3 |
| 3+ | 1635.9642                  | 1635.9642                 | 0                      | IWNNMTWMEWER           | [Hex]6[HexNAc]6[Fuc]1[NeuAc]3 |
|    |                            |                           |                        |                        |                               |
| 4+ | 1113.9421                  | 1113.9379                 | 4                      | IWNNMTWMEWER           | [Hex]5[HexNAc]6[Fuc]1[NeuAc]2 |
| 4+ | 1103.6847                  | 1103.6813                 | 3                      | IWNNMTWMEWER           | [Hex]6[HexNAc]5[Fuc]1[NeuAc]2 |
| 4+ | 1194.9633                  | 1194.9643                 | 1                      | IWNNMTWMEWER           | [Hex]7[HexNAc]6[Fuc]1[NeuAc]2 |
| 4+ | 1267.7409                  | 1267.7382                 | 2                      | IWNNMTWMEWER           | [Hex]7[HexNAc]6[Fuc]1[NeuAc]3 |
| 4+ | 1340.5119                  | 1340.5120                 | 0.1                    | IWNNMTWMEWER           | [Hex]7[HexNAc]6[Fuc]1[NeuAc]4 |
|    |                            |                           |                        |                        |                               |
| 2+ | 848.3762                   | 848.374                   | 3                      | IWNNMTWMEWER           | non-glycosylated              |
|    |                            |                           |                        |                        |                               |
| 3+ | 1238.2152                  | 1238.2088                 | 5                      | EIDNYTSEIYTLIEESQNQQEK | [Hex]3[HexNAc]2[Fuc]1         |
| 3+ | 1305.9056                  | 1305.9019                 | 3                      | EIDNYTSEIYTLIEESQNQQEK | [Hex]3[HexNAc]3[Fuc]1         |
| 3+ | 1373.5963                  | 1373.5950                 | 1                      | EIDNYTSEIYTLIEESQNQQEK | [Hex]3[HexNAc]4[Fuc]1         |
| 3+ | 1441.2901                  | 1441.2882                 | 1                      | EIDNYTSEIYTLIEESQNQQEK | [Hex]3[HexNAc]5[Fuc]1         |
| 3+ | 1508.9808                  | 1508.9813                 | 0.3                    | EIDNYTSEIYTLIEESQNQQEK | [Hex]3[HexNAc]6[Fuc]1         |
| 3+ | 1456.9513                  | 1456.9513                 | 0                      | EIDNYTSEIYTLIEESQNQQEK | [Hex]4[HexNAc]3[Fuc]1[NeuAc]1 |

| CS                            | Experimental<br><i>m/z</i> | Theoretical<br><i>m/z</i> | Mass<br>Error<br>(ppm) | Peptide Sequence       | Glycan                        |
|-------------------------------|----------------------------|---------------------------|------------------------|------------------------|-------------------------------|
| 3+                            | 1427.6162                  | 1427.6126                 | 3                      | EIDNYTSEIYTLIEESQNQQEK | [Hex]4[HexNAc]4[Fuc]1         |
| 3+                            | 1524.6451                  | 1524.6444                 | 0.5                    | EIDNYTSEIYTLIEESQNQQEK | [Hex]4[HexNAc]4[Fuc]1[NeuAc]1 |
| 3+                            | 1592.3362                  | 1592.3376                 | 1                      | EIDNYTSEIYTLIEESQNQQEK | [Hex]4[HexNAc]5[Fuc]1[NeuAc]1 |
|                               |                            |                           |                        |                        |                               |
| 4+                            | 1245.2723                  | 1245.2748                 | 2                      | EIDNYTSEIYTLIEESQNQQEK | [Hex]4[HexNAc]6[Fuc]1[NeuAc]1 |
| 4+                            | 973.4246                   | 973.4203                  | 4                      | EIDNYTSEIYTLIEESQNQQEK | [Hex]5[HexNAc]2               |
| 4+                            | 1111.4764                  | 1111.4745                 | 2                      | EIDNYTSEIYTLIEESQNQQEK | [Hex]5[HexNAc]4[Fuc]1         |
| 4+                            | 1184.2482                  | 1184.2483                 | 0.1                    | EIDNYTSEIYTLIEESQNQQEK | [Hex]5[HexNAc]4[Fuc]1[NeuAc]1 |
| 4+                            | 1257.0229                  | 1257.0222                 | 1                      | EIDNYTSEIYTLIEESQNQQEK | [Hex]5[HexNAc]4[Fuc]1[NeuAc]2 |
| 4+                            | 1162.2429                  | 1162.2443                 | 1                      | EIDNYTSEIYTLIEESQNQQEK | [Hex]5[HexNAc]5[Fuc]1         |
| 4+                            | 1235.0177                  | 1235.0182                 | 0.4                    | EIDNYTSEIYTLIEESQNQQEK | [Hex]5[HexNAc]5[Fuc]1[NeuAc]1 |
| 4+                            | 1307.7932                  | 1307.7920                 | 1                      | EIDNYTSEIYTLIEESQNQQEK | [Hex]5[HexNAc]5[Fuc]1[NeuAc]2 |
| 4+                            | 1358.5600                  | 1358.5619                 | 1                      | EIDNYTSEIYTLIEESQNQQEK | [Hex]5[HexNAc]6[Fuc]1[NeuAc]2 |
| 4+                            | 1202.7463                  | 1202.7575                 | 9                      | EIDNYTSEIYTLIEESQNQQEK | [Hex]6[HexNAc]5[Fuc]1         |
| 4+                            | 1275.5336                  | 1275.5314                 | 2                      | EIDNYTSEIYTLIEESQNQQEK | [Hex]6[HexNAc]5[Fuc]1[NeuAc]1 |
| 3+                            | 1797.4071                  | 1797.4046                 | 1                      | EIDNYTSEIYTLIEESQNQQEK | [Hex]6[HexNAc]5[Fuc]1[NeuAc]2 |
| 4+                            | 1421.0772                  | 1421.0791                 | 1                      | EIDNYTSEIYTLIEESQNQQEK | [Hex]6[HexNAc]5[Fuc]1[NeuAc]3 |
| 4+                            | 1326.3095                  | 1326.3012                 | 6                      | EIDNYTSEIYTLIEESQNQQEK | [Hex]6[HexNAc]6[Fuc]1[NeuAc]1 |
| 4+                            | 1471.8516                  | 1471.8489                 | 2                      | EIDNYTSEIYTLIEESQNQQEK | [Hex]6[HexNAc]6[Fuc]1[NeuAc]3 |
| 4+                            | 1366.8169                  | 1366.8144                 | 2                      | EIDNYTSEIYTLIEESQNQQEK | [Hex]7[HexNAc]6[Fuc]1[NeuAc]1 |
| 4+                            | 1512.3662                  | 1512.3621                 | 3                      | EIDNYTSEIYTLIEESQNQQEK | [Hex]7[HexNAc]6[Fuc]1[NeuAc]3 |
| 4+                            | 1585.1428                  | 1585.1360                 | 4                      | EIDNYTSEIYTLIEESQNQQEK | [Hex]7[HexNAc]6[Fuc]1[NeuAc]4 |
|                               |                            |                           |                        |                        |                               |
| 3+                            | 892.0862                   | 892.0837                  | 3                      | EIDNYTSEIYTLIEESQNQQEK | non-glycosylated              |
|                               |                            |                           |                        |                        |                               |
| <b>O-linked glycopeptides</b> |                            |                           |                        |                        |                               |
| 2+                            | 614.3473                   | 614.3452                  | 3                      | IEPLGVAPTK             | [HexNAc]1                     |
| 2+                            | 695.3728                   | 695.3716                  | 2                      | IEPLGVAPTK             | [Hex]1[HexNAc]1               |
| 2+                            | 840.9214                   | 840.9193                  | 2                      | IEPLGVAPTK             | [Hex]1[HexNAc]1[NeuAc]1       |
|                               |                            |                           |                        |                        |                               |
| 1+                            | 1024.6083                  | 1024.6037                 | 4                      | IEPLGVAPTK             | non-glycosylated              |
|                               |                            |                           |                        |                        |                               |
| 2+                            | 632.3183                   | 632.3181                  | 0.3                    | LICTTAVPW              | [HexNAc]1                     |
| 2+                            | 713.3455                   | 713.3445                  | 1                      | LICTTAVPW              | [Hex]1[HexNAc]1               |
| 2+                            | 858.8935                   | 858.8922                  | 2                      | LICTTAVPW              | [Hex]1[HexNAc]1[NeuAc]1       |
| 2+                            | 1004.4430                  | 1004.4399                 | 3                      | LICTTAVPW              | [Hex]1[HexNAc]1[NeuAc]2       |
| 2+                            | 960.4265                   | 960.4319                  | 6                      | LICTTAVPW              | [Hex]1[HexNAc]2[NeuAc]1       |
| 2+                            | 1041.4631                  | 1041.4583                 | 5                      | LICTTAVPW              | [Hex]2[HexNAc]2[NeuAc]1       |
| 2+                            | 1187.0120                  | 1187.0060                 | 5                      | LICTTAVPW              | [Hex]2[HexNAc]2[NeuAc]2       |
|                               |                            |                           |                        |                        |                               |
| 1+                            | 1060.5532                  | 1060.5495                 | 4                      | LICTTAVPW              | non-glycosylated              |
| 2+                            | 530.7795                   | 530.7784                  | 2                      | LICTTAVPW              | non-glycosylated              |

CS denotes charge state

Glycopeptides with asterisks (\*) were obtained from Endo-H reaction
